# Supplementary material for: Global burden of chronic respiratory diseases and risk factors, 1990–2019: an update from the Global Burden of Disease Study 2019
Source: eClinicalMedicine. 2023 Apr 25;59:101936. doi: 10.1016/j.eclinm.2023.101936 (PMC7614570; doi:10.1016/j.eclinm.2023.101936)
Supplement: Supplementary material [file mmc1.pdf]

## Appendix 1: Online Methods

|                                                                              |     |
|------------------------------------------------------------------------------|-----|
| List of abbreviations .....                                                  | 2   |
| GBD overview .....                                                           | 3   |
| Geographic locations of the analysis .....                                   | 3   |
| Time period of the analysis .....                                            | 3   |
| Statement of GATHER compliance .....                                         | 3   |
| Data input sources overview .....                                            | 4   |
| Cause of Death (CoD) modeling descriptions .....                             | 5   |
| Chronic Respiratory Diseases .....                                           | 5   |
| Chronic Obstructive Pulmonary Disease .....                                  | 8   |
| Pneumoconiosis Diseases .....                                                | 11  |
| Asthma .....                                                                 | 14  |
| Interstitial Lung Disease and Pulmonary Sarcoidosis .....                    | 17  |
| Other Chronic Respiratory Diseases .....                                     | 20  |
| Non-fatal modeling descriptions .....                                        | 23  |
| Chronic obstructive pulmonary disease (COPD) .....                           | 23  |
| Pneumoconiosis .....                                                         | 30  |
| Asthma .....                                                                 | 35  |
| Interstitial lung disease (ILD) and pulmonary sarcoidosis .....              | 40  |
| Other chronic respiratory diseases .....                                     | 44  |
| Risk-specific modeling descriptions .....                                    | 45  |
| Non-optimal temperature .....                                                | 45  |
| High body-mass index .....                                                   | 51  |
| Smoking .....                                                                | 59  |
| Secondhand smoke .....                                                       | 64  |
| Ambient particulate matter pollution .....                                   | 67  |
| Ambient ozone pollution .....                                                | 105 |
| Household air pollution .....                                                | 120 |
| Occupational risk factors .....                                              | 127 |
| Calculating the burden of multiple risk factors .....                        | 136 |
| Inclusion of a risk–outcome pair in the GBD .....                            | 137 |
| Supplementary Tables and Figure                                              |     |
| Table S1. GATHER checklist .....                                             | 138 |
| Table S2. List of International Classification of Diseases (ICD) codes ..... | 140 |
| Table S3. Restrictions on age and sex by cause for GBD 2019 .....            | 141 |
| Table S4. Total number of site years by cause and source type for 2019 ..... | 142 |

|                                                                                                                        |     |
|------------------------------------------------------------------------------------------------------------------------|-----|
| Table S5. CODEm covariates used .....                                                                                  | 143 |
| Table S6. Comparison of GBD 2017 and GBD 2019 covariates and level of covariates used in cause of death modeling ..... | 158 |
| Table S7. SDI quintiles for countries estimated in GBD 2019 .....                                                      | 167 |
| Figure S1. Classification of GBD regions and super regions .....                                                       | 168 |

## Appendix 2: Online Figures and Tables

### B.3 Chronic respiratory diseases (CRDs)

|                                                                                                                                                              |     |
|--------------------------------------------------------------------------------------------------------------------------------------------------------------|-----|
| Figure S1. Age-standardised rate of deaths and DALYs from CRDs in 2019 and their percent change from 1990 in men .....                                       | 170 |
| Figure S2. Age-standardised rate of deaths and DALYs from CRDs in 2019 and their percent change from 1990 to 2019 in women .....                             | 171 |
| Figure S3. Age-standardised rate of prevalence and incidence of CRDs in 2019 and their percent change from 1990 to 2019 in both sexes .....                  | 172 |
| Figure S4. Age-standardised rate of prevalence and incidence of CRDs in 2019 and their percent change from 1990 to 2019 in men .....                         | 173 |
| Figure S5. Age-standardised rate of prevalence and incidence of CRDs in 2019 and their percent change from 1990 to 2019 in women .....                       | 174 |
| Figure S6. Absolute death rate due to CRDs by age and sex, 1990 and 2019 .....                                                                               | 175 |
| Figure S7. Absolute prevalence rate due to CRDs by age and sex, 1990 and 2019 .....                                                                          | 176 |
| Figure S8. Absolute incidence rate due to CRDs by age, 2019 and sex, 1990 and 2019 .....                                                                     | 177 |
| Figure S9. Contribution of YLLs and YLDs to age-standardised and age-specific DALYs from CRDs, 2019 .....                                                    | 178 |
| Figure S10. Correlation between the SDI and age-standardised DALYs rates due to CRDs in 1990, 2000, 2010, and 2019 globally .....                            | 179 |
| Figure S11. Correlation between the SDI and age-standardised death rates due to CRDs in 1990, 2000, 2010, and 2019 globally .....                            | 180 |
| Figure S12. Correlation between the SDI and age-standardised prevalence rates due to CRDs in 1990, 2000, 2010, and 2019 globally .....                       | 181 |
| Figure S13. Correlation between the SDI and age-standardised incidence rates due to CRDs in 1990, 2000, 2010, and 2019 globally .....                        | 182 |
| Figure S14. Ranked contribution of the specific sub-causes to the age-standardised DALYs from CRDs by region, 2019, for both sexes, females, and males ..... | 183 |
| Figure S15. Ranked contribution of risk factors to the age-standardised death from CRDs by region, 2019, for both sexes, females, and males .....            | 184 |

|                                                                                                                                                             |     |
|-------------------------------------------------------------------------------------------------------------------------------------------------------------|-----|
| Figure S16. Age-standardised DALYs from CRDs attributed to risk factors by sex and region in 1990 and 2019 .....                                            | 185 |
| <b>B.3.1 Chronic obstructive pulmonary diseases (COPD)</b>                                                                                                  |     |
| Figure S17. Global age-standardised rates of incidence, prevalence, deaths, and DALYs of COPD by sex, 1990-2019 .....                                       | 186 |
| Figure S18. Global age-standardised rates of incidence, prevalence, deaths, and DALYs of COPD by SDI, both sexes, 1990-2019 .....                           | 187 |
| Figure S19. Ranked contribution of risk factors to the age-standardised DALYs from COPD by region, 2019, for both sexes, females, and males .....           | 188 |
| Figure S20. Age-standardised DALYs from COPD attributed to risk factors by sex and region in 1990 and 2019 .....                                            | 189 |
| <b>B.3.3 Asthma</b>                                                                                                                                         |     |
| Figure S21. Global age-standardised rates of incidence, prevalence, deaths, and DALYs of asthma by sex, 1990-2019 .....                                     | 190 |
| Figure S22. Global age-standardised rates of incidence, prevalence, deaths, and DALYs of asthma by SDI, both sexes, 1990-2019 .....                         | 191 |
| Figure S23. Ranked contribution of risk factors to the age-standardised DALYs from asthma by region, 2019, for both sexes, females, and males .....         | 192 |
| Figure S24. Age-standardised DALYs from asthma attributed to risk factors by sex and region in 1990 and 2019 .....                                          | 193 |
| <b>B.3.4 Interstitial Lung Disease (ILD) and pulmonary sarcoidosis</b>                                                                                      |     |
| Figure S25. Global age-standardised rates of incidence, prevalence, deaths, and DALYs of ILD and pulmonary sarcoidosis by sex, 1990-2019 .....              | 194 |
| Figure S26. Global age-standardised rates of incidence, prevalence, deaths, and DALYs of ILD and pulmonary sarcoidosis by SDI, both sexes, 1990-2019 .....  | 195 |
| <b>B.3.2 Pneumoconiosis (Coal Worker's Pneumoconiosis, Asbestosis, Silicosis, and Other Pneumoconiosis)</b>                                                 |     |
| Figure S27. Global age-standardised rates of incidence, prevalence, deaths, and DALYs of pneumoconiosis by sex, 1990-2019 .....                             | 196 |
| Figure S28. Global age-standardised rates of incidence, prevalence, deaths, and DALYs of pneumoconiosis by SDI, both sexes, 1990-2019 .....                 | 197 |
| Figure S29. Ranked contribution of risk factors to the age-standardised DALYs from pneumoconiosis by region, 2019, for both sexes, females, and males ..... | 198 |
| Figure S30. Age-standardised DALYs from pneumoconiosis attributed to risk factors by sex and region in 1990 and 2019 .....                                  | 199 |

|                                                                                                                                                                                                                                                                                                                                                                                                             |     |
|-------------------------------------------------------------------------------------------------------------------------------------------------------------------------------------------------------------------------------------------------------------------------------------------------------------------------------------------------------------------------------------------------------------|-----|
| Figure S31. Ranked contribution of the specific sub-causes to the age-standardised DALYs from pneumoconiosis by region, 2019, for both sexes, females, and males .....                                                                                                                                                                                                                                      | 200 |
| Table S1. Global incidence, prevalence, deaths, DALYs, YLLs, and YLDs from CRDs by sex and for both sexes combined .....                                                                                                                                                                                                                                                                                    | 201 |
| Table S2. Rate of incidence, prevalence, deaths, DALYs, YLLs, and YLDs from CRDs by SDI, by sex and for both sexes combined .....                                                                                                                                                                                                                                                                           | 203 |
| Table S3. Results from decomposition analysis of the total incidence number in both sexes combined, by region and SDI .....                                                                                                                                                                                                                                                                                 | 209 |
| Table S4. Age-standardised rate of incidence, prevalence, deaths, DALYs, YLLs, and YLDs from sub-causes of pneumoconiosis by SDI, by sex .....                                                                                                                                                                                                                                                              | 211 |
| Table S5. Age-standardised rates and the total number of incidence, prevalence, deaths, DALYs, YLLs, and YLDs in CRDs and its sub causes (i.e., COPD, pneumoconiosis, asthma, ILD and pulmonary sarcoidosis, and other CRDs) in males, females, and both sexes combined in 7 GBD super regions, 21 GBD regions, and 204 countries and territories in 1990 and 2019 with percent change (1990 to 2019) ..... | 217 |
| Table S6. Age-standardised rates and crude figures of deaths, DALYs, YLLs, and YLDs attributed to risk factors in CRDs and its sub causes (i.e., COPD, pneumoconiosis, and asthma) in males, females, and both sexes combined in 7 GBD super regions, 21 GBD regions, and 204 countries and territories in 1990 and 2019 with percent change (1990 to 2019) .....                                           | 281 |

### **Appendix 3: Authors' Contributions**

|                              |     |
|------------------------------|-----|
| Authors' Contributions ..... | 341 |
|------------------------------|-----|

## **Appendix 1: Online Methods**

### **Results appendix to “Global Burden of Chronic Respiratory Diseases and Risk Factors, 1990–2019: Update From the GBD 2019 Study”**

This appendix provides further methodological detailed results for “Global Burden of Chronic Respiratory Diseases and Risk Factors, 1990–2019: Update From the GBD 2019 Study”.

Portions of this appendix have been reproduced or adapted from Vos et al. and Murray et al.

#### **Reference:**

Vos T, Lim SS, Abbafati C, et al. Global burden of 369 diseases and injuries in 204 countries and territories, 1990-2019: a systematic analysis for the Global Burden of Disease Study 2019. *The Lancet* 2020; 396(10258): 1204-22.

Murray CJL, Aravkin AY, Zheng P, et al. Global burden of 87 risk factors in 204 countries and territories, 1990-2019: a systematic analysis for the Global Burden of Disease Study 2019. *The Lancet* 2020; 396(10258): 1223-49.

## List of abbreviations

| Abbreviation | Meaning                                                            |
|--------------|--------------------------------------------------------------------|
| BMI          | body-mass index                                                    |
| CF           | correction factor                                                  |
| COD          | causes of death                                                    |
| CODEm        | cause of death ensemble modelling                                  |
| COPD         | chronic obstructive pulmonary disease                              |
| CRA          | comparative risk assessment                                        |
| CSV          | comma-separated values                                             |
| CSMR         | cause-specific mortality rate                                      |
| DALY         | disability-adjusted life-year                                      |
| DHS          | Demographic and Health Survey                                      |
| DisMod-MR    | disease model-Bayesian meta-regression                             |
| DW           | disability weights                                                 |
| EMR          | excess mortality rate                                              |
| FAO          | Food and Agriculture Organization                                  |
| GATHER       | Guidelines for Accurate and Transparent Health Estimates Reporting |
| GBD          | Global Burden of Diseases, Injuries, and Risk Factors Study        |
| GHDx         | Global Health Data exchange                                        |
| HAP          | household air pollution                                            |
| HAQ          | Healthcare Access and Quality                                      |
| ICD-         | International Classification of Diseases                           |
| IER          | integrated exposure response                                       |
| IHME         | Institute for Health Metrics and Evaluation                        |
| ILO          | International Labour Organization                                  |
| LDI          | lag-distributed income                                             |
| LOESS        | locally estimated scatterplot smoothing                            |
| MCCD         | Medical Certification of Causes of Death                           |
| MEPS         | Medical Expenditure Panel Surveys                                  |
| MICS         | Multiple Indicator Cluster Surveys                                 |
| MR-BRT       | meta-regression—Bayesian, regularised, trimmed                     |
| PAF          | population attributable fraction                                   |
| PM2.5        | particulate matter <2.5 µm in diameter                             |
| RMSE         | root mean square error                                             |
| RR           | relative risk                                                      |
| SCD          | Survey of Causes of Death                                          |
| SDI          | Socio-demographic Index                                            |
| SHS          | secondhand smoke                                                   |
| SRS          | Sample Registration System                                         |
| ST-GPR       | spatiotemporal Gaussian process regression                         |
| TMREL        | theoretical minimum-risk exposure level                            |
| UI           | uncertainty interval                                               |
| UN           | United Nations                                                     |
| USA          | United States                                                      |
| VA           | verbal autopsy                                                     |
| VR           | vital registration                                                 |
| WHO          | World Health Organization                                          |
| YLDs         | years lived with disability                                        |
| YLLs         | years of life lost                                                 |

## GBD overview

### Geographic locations of the analysis

We produced estimates for 204 countries and territories that were grouped into 21 regions and seven super-regions. The seven super-regions are central Europe, eastern Europe, and central Asia; high income; Latin America and the Caribbean; north Africa and the Middle East; south Asia; southeast Asia, east Asia, and Oceania; and sub-Saharan Africa. For GBD 2019, 9 countries and territories (Cook Islands, Monaco, San Marino, Nauru, Niue, Palau, Saint Kitts and Nevis, Tokelau, and Tuvalu) were added, such that the GBD location hierarchy now includes all WHO member states. This year, GBD includes subnational analyses for several new countries and continues to analyse at subnational levels countries that were added in previous cycles. Subnational estimation in GBD 2019 includes five new countries (Italy, Nigeria, Pakistan, the Philippines, and Poland) and 16 countries previously estimated at subnational levels (Brazil, China, Ethiopia, India, Indonesia, Iran, Japan, Kenya, Mexico, New Zealand, Norway, Russia, South Africa, Sweden, the UK, and the USA). All analyses are at the first level of administrative organisation within each country except for New Zealand (by Māori ethnicity), Sweden (by Stockholm and non-Stockholm), the UK (by local government authorities), and the Philippines (by provinces). All subnational estimates for these countries were incorporated into model development and evaluation as part of GBD 2017. To meet data use requirements, in this publication we present subnational estimates for Brazil, India, Indonesia, Japan, Kenya, Mexico, Sweden, the UK, and the USA); given space constraints, these results are presented in appendix 2 instead of the main text. Subnational estimates for China are included in maps but are not reported in appendix tables. Subnational estimates for other countries will be released in separate publications.

For GBD 2019, we have also defined locations as standard locations and non-standard locations. Standard GBD locations are defined as the set of all subnationals belonging to countries where data quality is high and with populations over 200 million, in addition to all other countries. Standard locations include the subnationals for China, India, the United States, and Brazil, but not Indonesia; China, India, the United States, and Brazil are also included at the country level. All other countries with subnational estimates are defined as non-standard locations.

### Time period of the analysis

A complete set of risk-specific exposures, relative risks (RRs), theoretical minimum-risk exposure levels (TMRELs), and population attributable fractions (PAFs) were computed for the years 1990–2019.

### Statement of GATHER compliance

This study complies with the Guidelines for Accurate and Transparent Health Estimates Reporting (GATHER) recommendations. We have documented the steps involved in our analytical procedures and detailed the data sources used. See table S1 for the GATHER checklist.

The GATHER recommendations may be found here: <http://gather-statement.org/>

**Reference:** Stevens GA, Alkema L, Black RE, et al. Guidelines for Accurate and Transparent Health Estimates Reporting: the GATHER statement. *The Lancet* 2016; 388: e19–23.

## Data input sources overview

GBD 2019 incorporated a large number and wide variety of input sources to estimate mortality, causes of death and illness, and risk factors for 204 countries and territories from 1990-2019. These input sources are accessible through an interactive citation tool available in the GHDx.

Users can retrieve citations for a specific GBD component, cause or risk, and location by choosing from the available selection boxes. They can then view and access GHDx records for input sources and export a comma-separated value (CSV) file that includes the GHDx metadata, citations, and information about where the data were used in GBD. Additional metadata for each input source are available through the citation tool as required by the GATHER statement.

The citation tool is accessible through the GHDx at <http://ghdx.healthdata.org/gbd-2019/data-input-sources>.

**Reference:** Stanaway JD, Afshin A, Gakidou E, et al. Global, regional, and national comparative risk assessment of 84 behavioural, environmental and occupational, and metabolic risks or clusters of risks for 195 countries and territories, 1990–2017: a systematic analysis for the Global Burden of Disease Study 2017. *The Lancet* 2018; 392: 1923–94.

# Cause of Death (CoD) modeling descriptions

## Chronic Respiratory Diseases

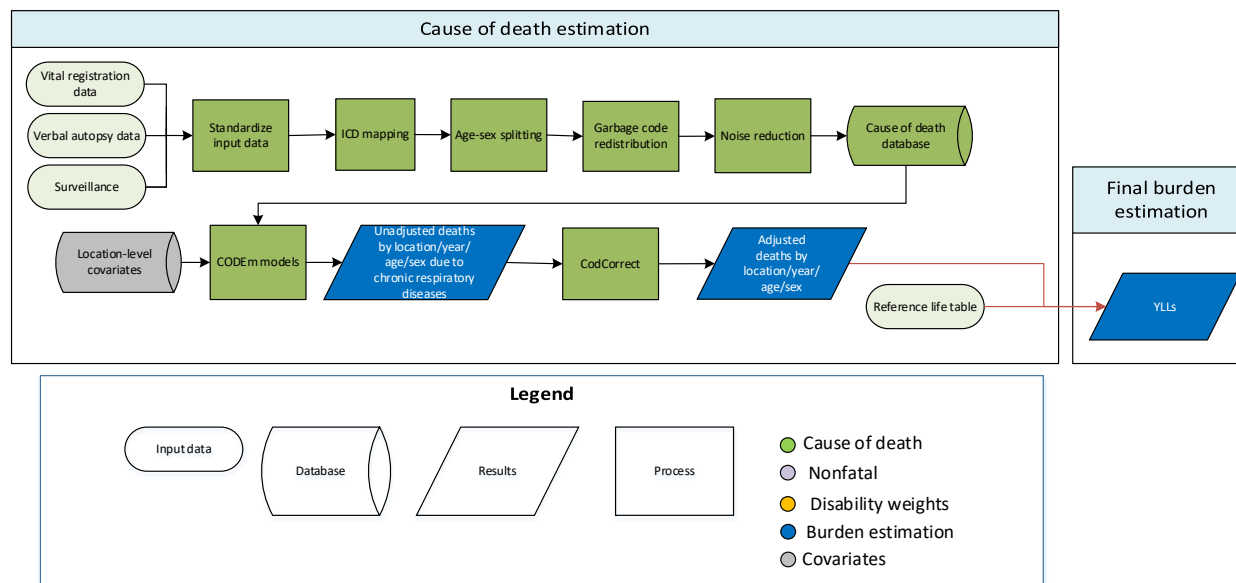

### Input data

Sources used to estimate chronic respiratory disease mortality included vital registration, verbal autopsy, and surveillance data from China. Our outlier criteria excluded data points that (1) were implausibly high or low, (2) substantially conflicted with established age or temporal patterns, or (3) significantly conflicted with other data sources conducted from the same locations or locations with similar characteristics (ie, Socio-demographic Index).

### Modelling strategy

The standard CODEm modelling approach was applied to estimate deaths due to chronic respiratory diseases. Separate models were conducted for male and female mortality, and the age range for both models was 1 to 95+ years.

### Key Changes from GBD 2017

- We added estimates for the following new locations: Monaco, San Marino, Cook Islands, Nauru, Niue, Palau, Tokelau, Tuvalu, Monaco, San Marino, St Kitts and Nevis
- We added subnational location data for the following: Italy, Poland, Pakistan, the Philippines, and Nigeria
- We excluded all MCCD (the very incomplete hospital death data largely from urban areas) and all SCD (earlier verbal autopsy data using lesser quality instruments and analysis) from India, based on discussions with GBD India collaborators. Thus, the estimates are driven by the more recent higher quality SRS verbal autopsy data and covariates.
- Healthcare quality and access index covariate changed to a level 2 covariate from level 1.
- Smoking prevalence and indoor air pollution both moved to a level 1 covariate from level 2.
- We removed the covariate SEV for chronic respiratory disease.
- The SDI covariate was allowed to take a positive or negative direction in GBD 2017, but was specified to only be selected if a negative association was detected in GBD 2019.

The following covariates were used for GBD 2019:

| Level | Covariate                                                                | Direction |
|-------|--------------------------------------------------------------------------|-----------|
| 1     | indoor air pollution (all cooking fuels)                                 | +         |
|       | cumulative cigarettes (10 years)                                         | +         |
|       | cumulative cigarettes (5 years)                                          | +         |
|       | smoking prevalence                                                       | +         |
| 2     | healthcare quality and access index                                      | -         |
|       | outdoor air pollution (PM <sub>2.5</sub> )                               | +         |
|       | population above 1500m elevation (proportion)                            | +         |
| 3     | LDI (I\$ per capita)                                                     | -         |
|       | education (years per capita)                                             | -         |
|       | socio-demographic index                                                  | -         |
|       | population between 500 and 1,500m elevation (proportion)                 | +         |
|       | population density over 1,000 people/kilometer <sup>2</sup> (proportion) | +         |

Chronic respiratory diseases served as a “parent” to the following causes:

- chronic obstructive pulmonary disease
- pneumoconiosis (silicosis, asbestosis, coal worker’s pneumoconiosis, other pneumoconiosis)
- asthma
- interstitial lung disease and pulmonary sarcoidosis
- other chronic respiratory diseases

The unadjusted death estimates for all these “child” causes are summed and fit to the distribution of deaths estimated for the “parent” during the CODCorrect adjustment process. This results in deaths recorded using non-specific coding systems, such as verbal autopsy, being included in the parent model and redistributed to the child models proportionately. This approach assumes that deaths reported in non-specific data-sources have the same underlying distribution of specific causes as deaths reported in more specific data-sources.

## Covariate Influences:

The following plots show the influence of each covariate on the four CODEm models (male global, male data rich, female global, and female data rich). A positive standardized beta (to the right) means that the covariate was associated with increased death. A negative standardized beta (to the left) means the covariate was associated with decreased death.

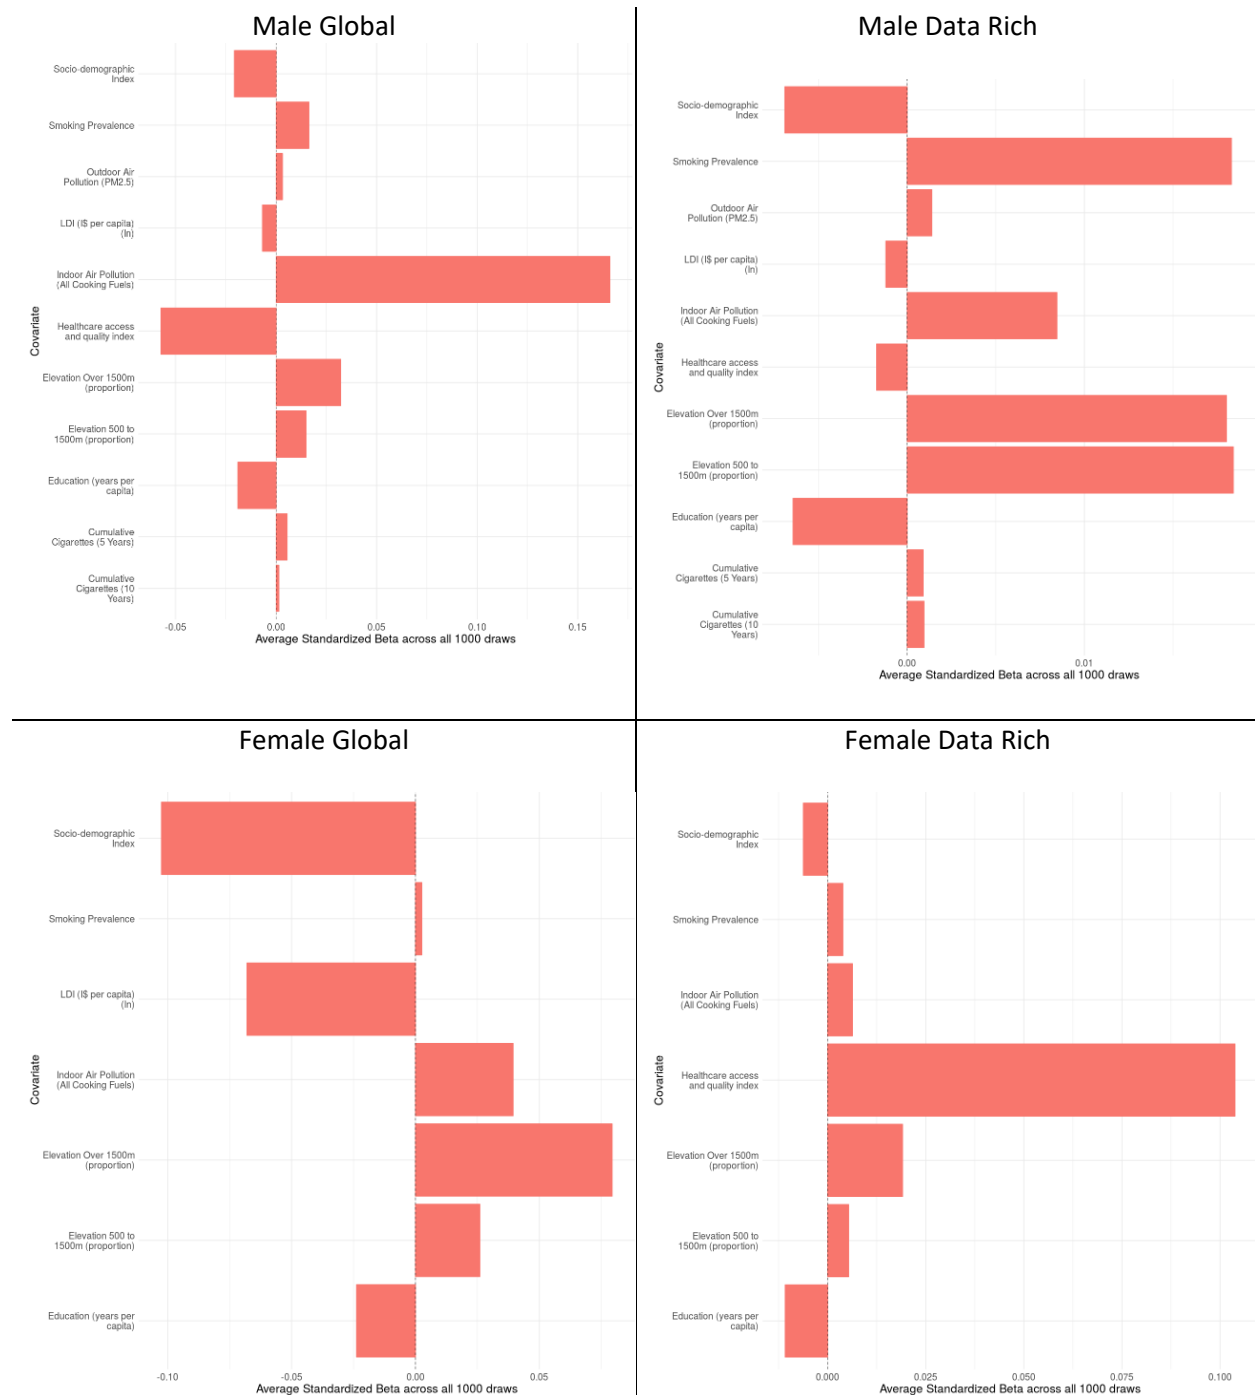

# Chronic Obstructive Pulmonary Disease

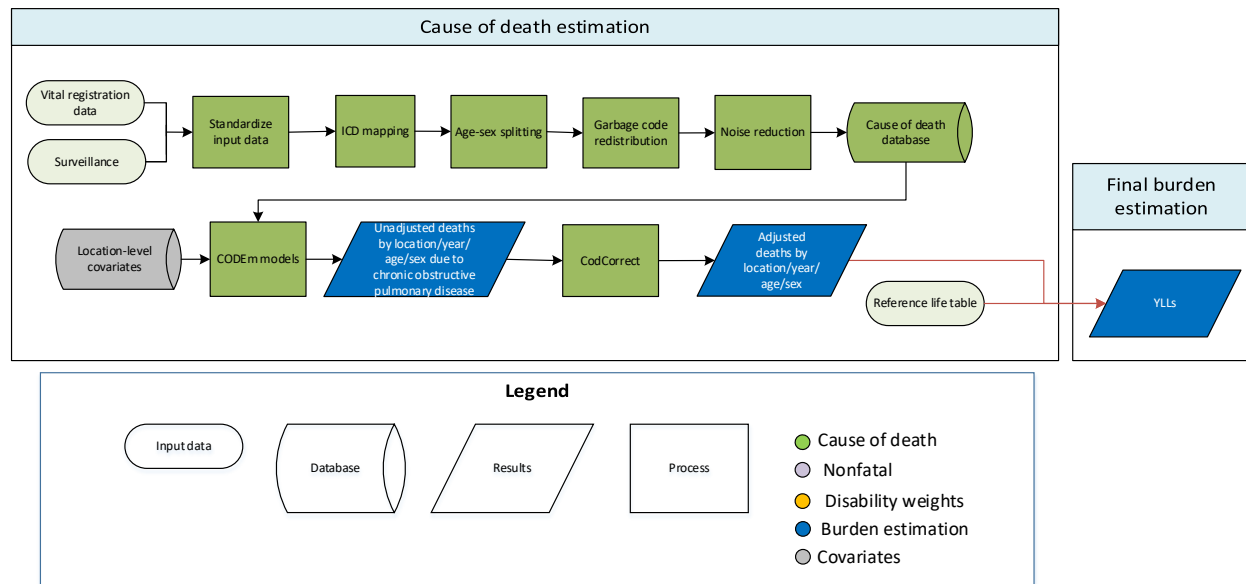

## Input data

Data used to estimate chronic obstructive pulmonary disease (COPD) mortality included vital registration and surveillance data from the cause of death (COD) database. Verbal autopsy data were not included and were instead mapped to an overall chronic respiratory disease model. Our outlier criteria excluded data points that (1) were implausibly high or low, (2) substantially conflicted with established age or temporal patterns, or (3) substantially conflicted with other data sources conducted from the same locations or locations with similar characteristics (ie, Socio-demographic Index).

## Modelling strategy

The standard CODEm modelling approach (as described in the relevant appendix section) was applied to estimate deaths due to COPD. Separate models were conducted for male and female mortality, and the age range for both models was 1-95+ years.

## Key Changes from GBD 2017

- We added estimates for the following new locations: Monaco, San Marino, Cook Islands, Nauru, Niue, Palau, Tokelau, Tuvalu, Monaco, San Marino, St Kitts and Nevis
- We added subnational location data for the following: Italy, Poland, Pakistan, the Philippines, and Nigeria
- We added a covariate for total number of cigarettes smoked in the past 20 years, by age group. We also replaced the covariate for log income per capita with 10-year lagged income per capita.
- Outdoor air pollution covariate was moved to level 1.

The following covariates were used for GBD 2019:

| Level | Covariate                                         | Direction |
|-------|---------------------------------------------------|-----------|
| 1     | log-transformed SEV scalar: COPD                  | +         |
|       | cumulative cigarettes (10 years)                  | +         |
|       | cumulative cigarettes (5 years)                   | +         |
|       | cumulative cigarettes (20 years)                  | +         |
|       | elevation over 1,500m (proportion)                | +         |
|       | outdoor air pollution (PM <sub>2.5</sub> )        | +         |
| 2     | smoking prevalence                                | +         |
|       | indoor air pollution (all cooking fuels)          | +         |
|       | healthcare access and quality index               | -         |
| 3     | socio-demographic index                           | -         |
|       | lagged 10 year income per capita (I\$ per capita) | -         |
|       | education (years per capita)                      | -         |

Chronic obstructive pulmonary disease is a “child” disease that is fit into an overall “parent” chronic respiratory disease model. The unadjusted death estimates from COPD are summed alongside other “child” causes (asthma, interstitial lung disease and pulmonary sarcoidosis, and pneumoconiosis) and fit to the distribution of deaths in an overall chronic respiratory disease “parent” model as part of the CODCorrect adjustment process. This results in deaths recorded using non-specific coding systems, such as verbal autopsy, being included in the parent model and redistributed to the child models proportionately.

## Covariate Influences:

The following plots show the influence of each covariate on the four CODEm models (male global, male data rich, female global, and female data rich). A positive standardized beta (to the right) means that the covariate was associated with increased death. A negative standardized beta (to the left) means the covariate was associated with decreased death.

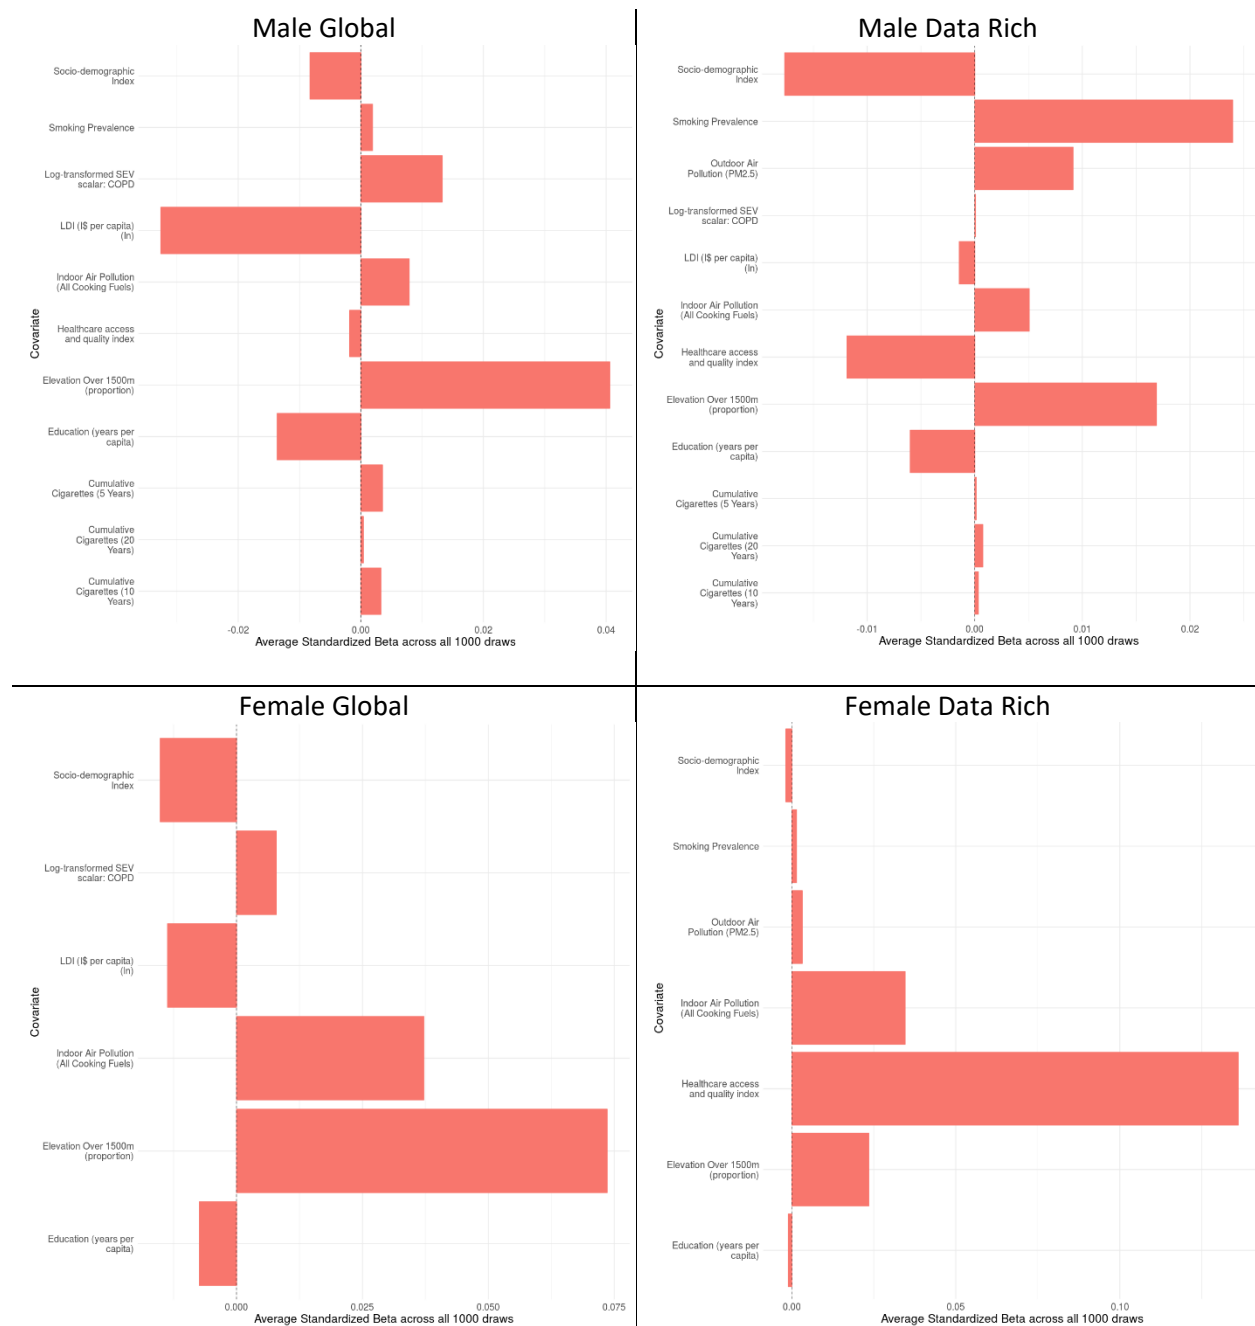

# Pneumoconiosis Diseases: Silicosis, Asbestosis, Coal Worker's Pneumoconiosis, and Other Pneumoconiosis

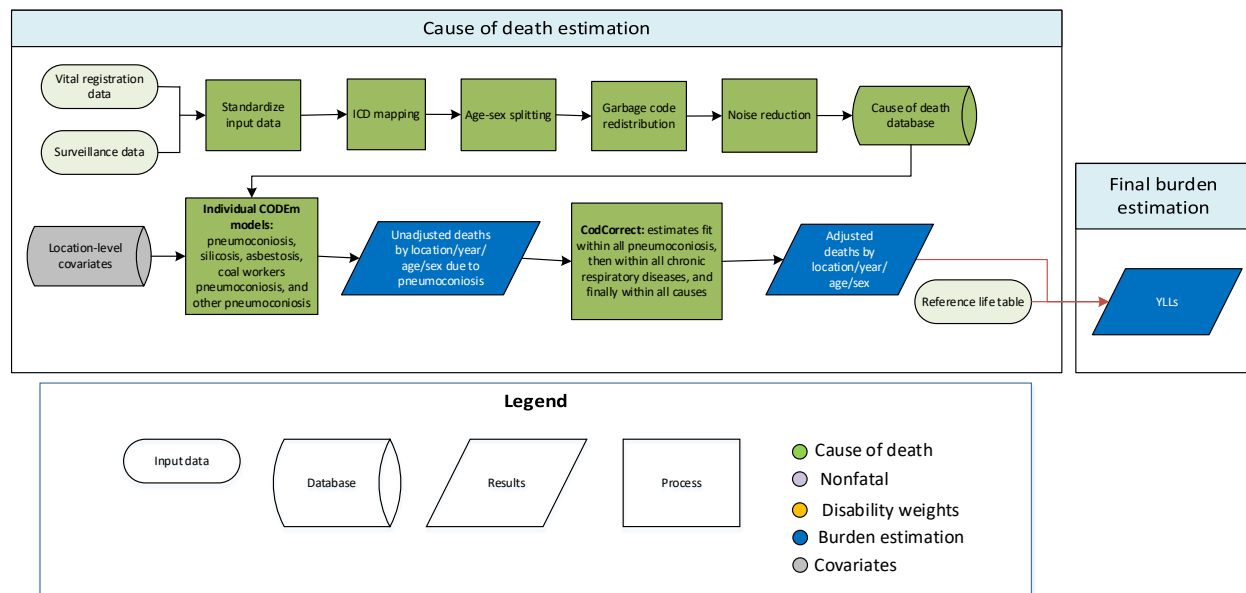

## Input data

Data used to estimate pneumoconiosis mortality included vital registration and China mortality surveillance data from the cause of death (COD) database. Our outlier criteria excluded data points that (1) were implausibly high or low, (2) substantially conflicted with established age or temporal patterns, or (3) substantially conflicted with other data sources conducted from the same locations or locations with similar characteristics (ie, socio-demographic index).

## Modelling strategy

The standard CODEm modelling approach was applied to estimate deaths due to pneumoconiosis diseases. Separate models were conducted for male and female mortality, and the age range for both models was 15–95+ years. The mortality estimates from pneumoconiosis disease models were ultimately fit into the chronic respiratory envelope, which is the parent cause for pneumoconiosis disease. The pneumoconiosis model serves as an envelope or “parent” model for silicosis, asbestosis, coal worker’s pneumoconiosis, and other pneumoconiosis. In CoDCorrect, estimates for each of these “child” models are first fit within all pneumoconiosis, then within all chronic respiratory disease, before being fit to the all-cause mortality envelope.

## Key Changes from GBD 2017

- We added estimates for the following new locations: Monaco, San Marino, Cook Islands, Nauru, Niue, Palau, Tokelau, Tuvalu, Monaco, San Marino, St Kitts and Nevis
- We added subnational location data for the following: Italy, Poland, Pakistan, the Philippines, and Nigeria
- We switched the covariate from log income per capita to a 10-year lagged income per capita and removed the elevation covariates that were previously in GBD 2017.

- We added back SEV scalars that were previously dropped in GBD 2017. These are SEVs for occupational asbestos, beryllium, and silica.

The following table indicates covariates used in the pneumoconiosis models, their level, and direction:

| Level | Covariate                                            | Direction |
|-------|------------------------------------------------------|-----------|
| 1     | asbestos consumption per capita*                     | +         |
|       | coal production per capita*                          | +         |
|       | gold production per capita*                          | +         |
|       | age- and sex-specific SEV for occupational asbestos  | +         |
|       | age- and sex-specific SEV for occupational beryllium | +         |
|       | age- and sex-specific SEV for occupational silica    | +         |
| 2     | smoking prevalence                                   | +         |
|       | indoor air pollution (all cooking fuels)             | +         |
|       | cumulative cigarettes (5 years)                      | +         |
|       | healthcare access and quality index                  | -         |
| 3     | LDI (I\$ per capita)                                 | -         |
|       | education (years per capita)                         | -         |
|       | socio-demographic index                              | -         |

\* asbestos, coal, and gold covariates are each only used in a subset of the pneumoconiosis models, as follows: all three are included in the parent all pneumoconiosis model, asbestos consumption is included in the asbestosis model, coal production is included in the coal worker's pneumoconiosis model, and gold production is included in the silicosis model.

## Covariate Influences:

The following plots show the influence of each covariate on the four CODEm models (male global, male data rich, female global, and female data rich). A positive standardized beta (to the right) means that the covariate was associated with increased death. A negative standardized beta (to the left) means the covariate was associated with decreased death.

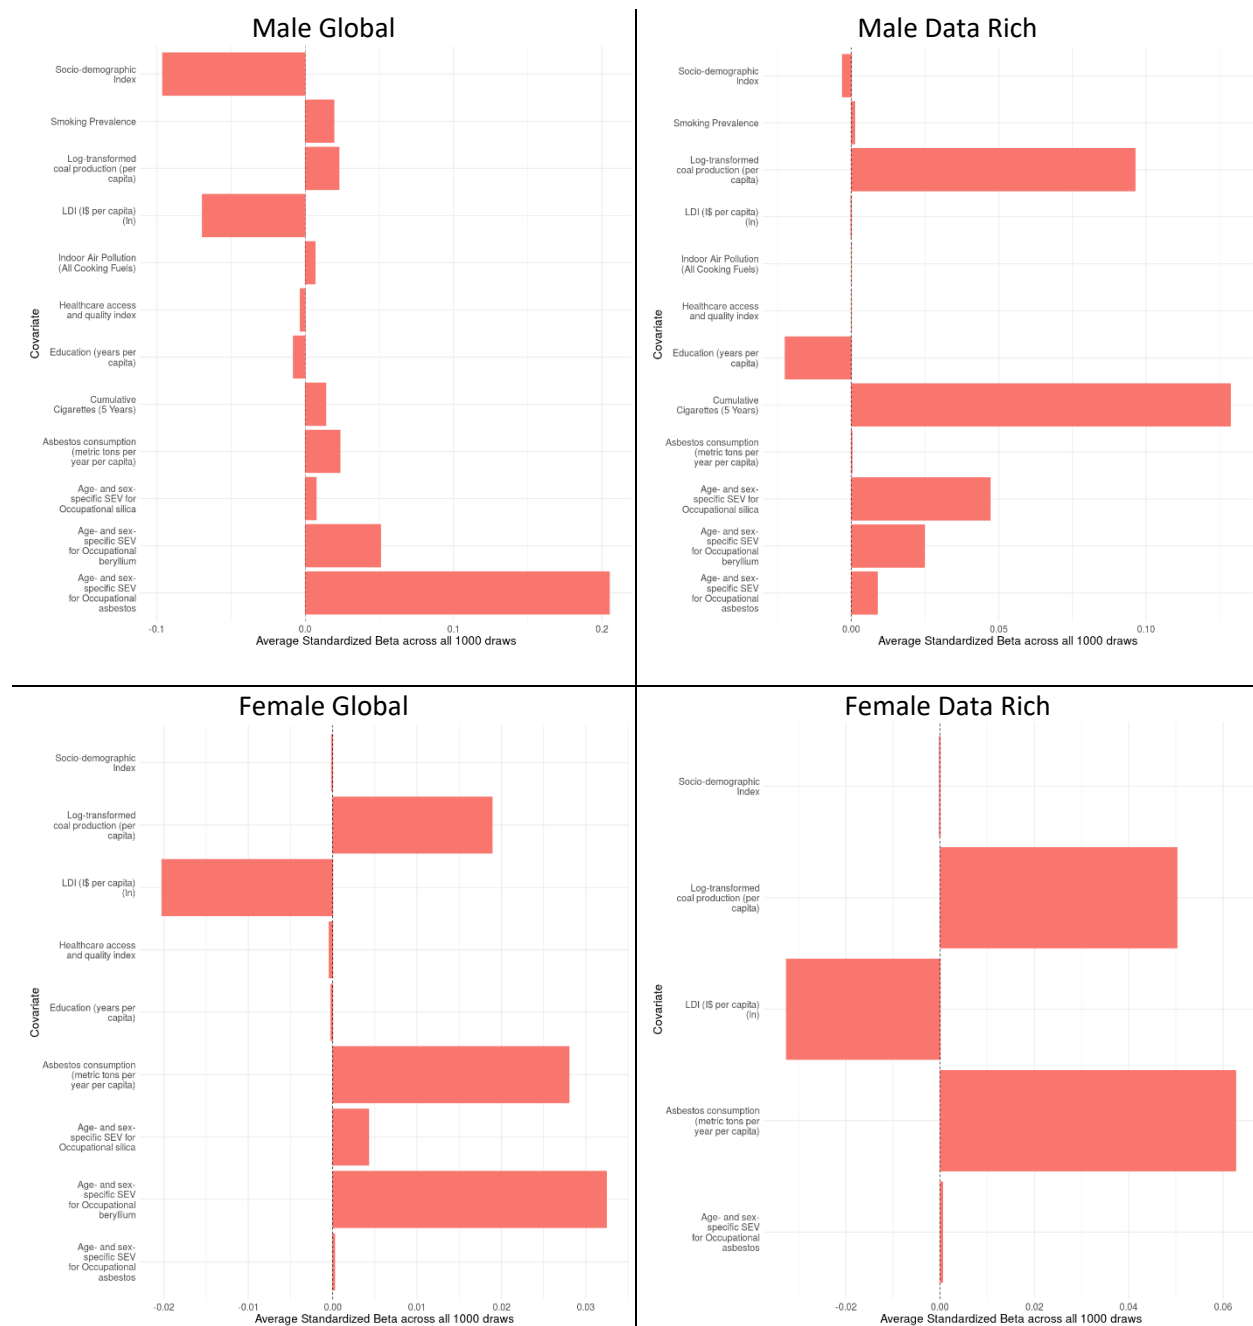

# Asthma

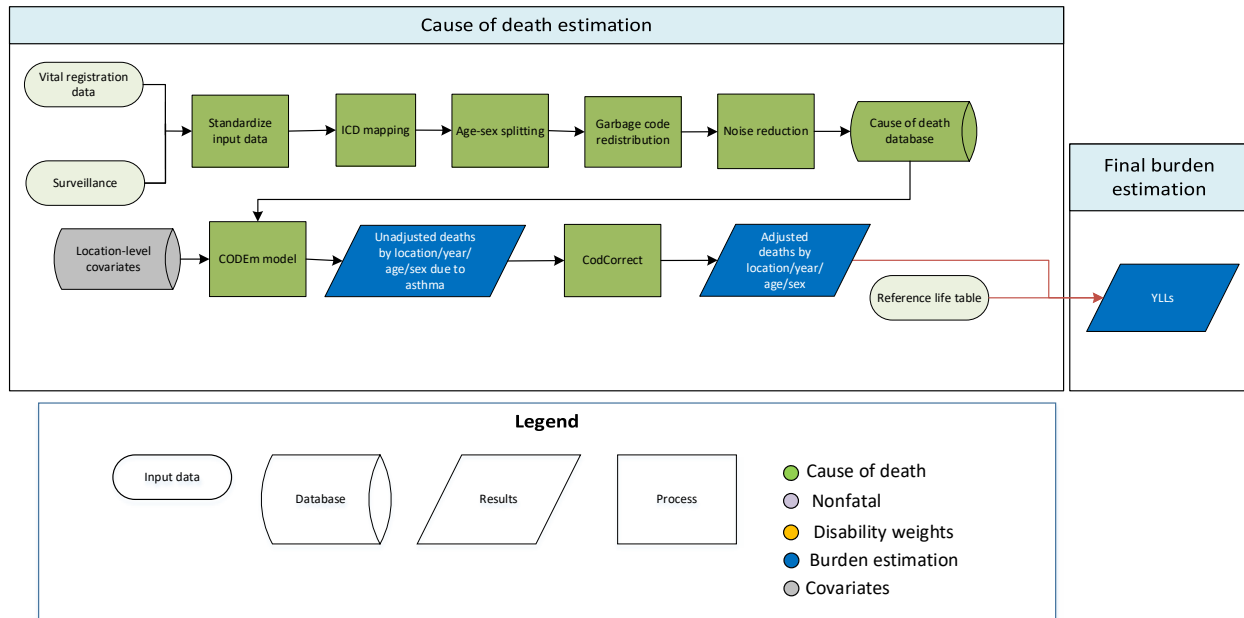

## Input data

Data used to estimate asthma mortality included vital registration and surveillance data from the cause of death (COD) database. Verbal autopsy data were not included and were instead mapped to an overall chronic respiratory model. Our outlier criteria excluded data points that (1) were implausibly high or low relative to global or regional patterns, (2) substantially conflicted with established age or temporal patterns, or (3) significantly conflicted with other data sources conducted from the same locations or locations with similar characteristics (ie, Socio-demographic Index).

## Modelling strategy

The standard CODEm modelling approach was applied to estimate deaths due to asthma. Separate models were conducted for male and female mortality, and the age range for both models was 1–95+ years.

### Key Changes from GBD 2017

- We added estimates for the following new locations: Monaco, San Marino, Cook Islands, Nauru, Niue, Palau, Tokelau, Tuvalu, Monaco, San Marino, St Kitts and Nevis
- We added subnational location data for the following: Italy, Poland, Pakistan, the Philippines, and Nigeria
- We switched the covariate from log income per capita to a 10-year lagged income per capita.

The following table has the full list of covariates used in GBD 2019.

| Level | Covariate                                  | Direction |
|-------|--------------------------------------------|-----------|
| 1     | log-transformed SEV scalar: asthma         | +         |
|       | cumulative cigarettes (10 years)           | +         |
|       | cumulative cigarettes (5 years)            | +         |
|       | healthcare access and quality index        | -         |
| 2     | smoking prevalence                         | +         |
|       | indoor air pollution (all cooking fuels)   | +         |
|       | outdoor air pollution (PM <sub>2.5</sub> ) | +         |
| 3     | lagged 10 year LDI (I\$ per capita)        | -         |
|       | education (years per capita)               | -         |
|       | socio-demographic index                    | -         |

Asthma is a “child” disease that is fit into an overall chronic respiratory disease model. In CODCorrect, the unadjusted death estimates for asthma are combined with those for chronic obstructive pulmonary disease, interstitial lung disease and pulmonary sarcoidosis, pneumoconiosis, and other chronic respiratory diseases and fit to the distribution of deaths in an overall chronic respiratory disease “parent” model. This results in deaths recorded using non-specific coding systems, such as verbal autopsy, being included in the parent model and redistributed to the child models proportionately.

## Covariate Influences:

The following plots show the influence of each covariate on the four CODEm models (male global, male data rich, female global, and female data rich). A positive standardized beta (to the right) means that the covariate was associated with increased death. A negative standardized beta (to the left) means the covariate was associated with decreased death.

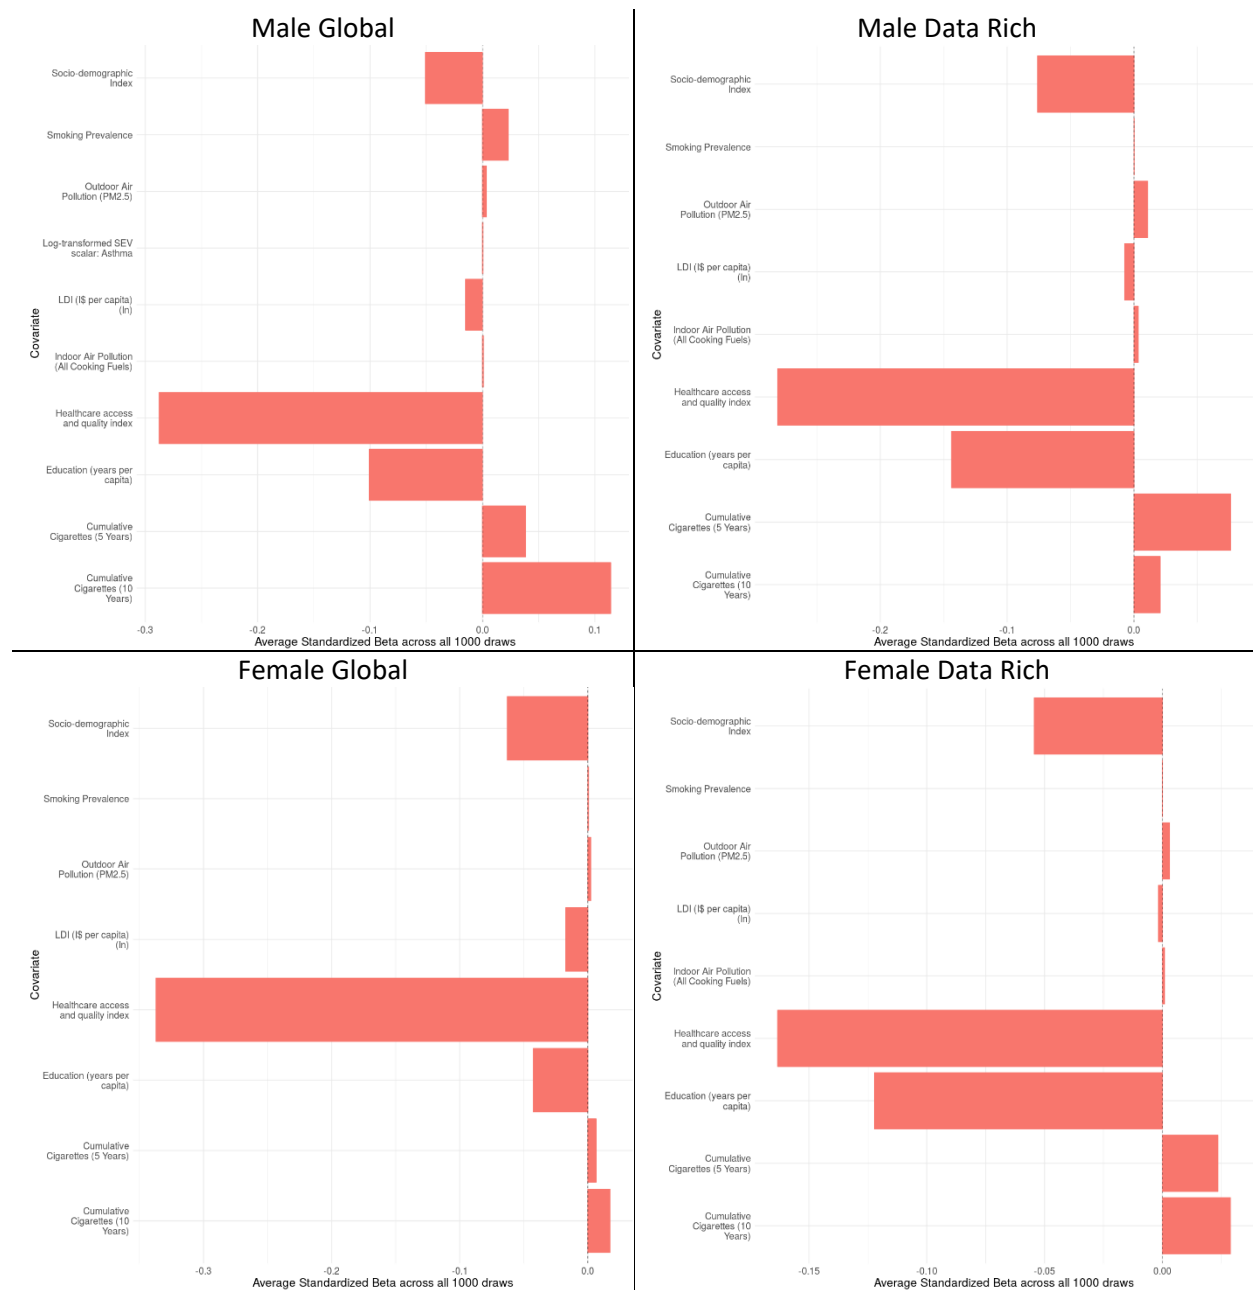

# Interstitial Lung Disease and Pulmonary Sarcoidosis

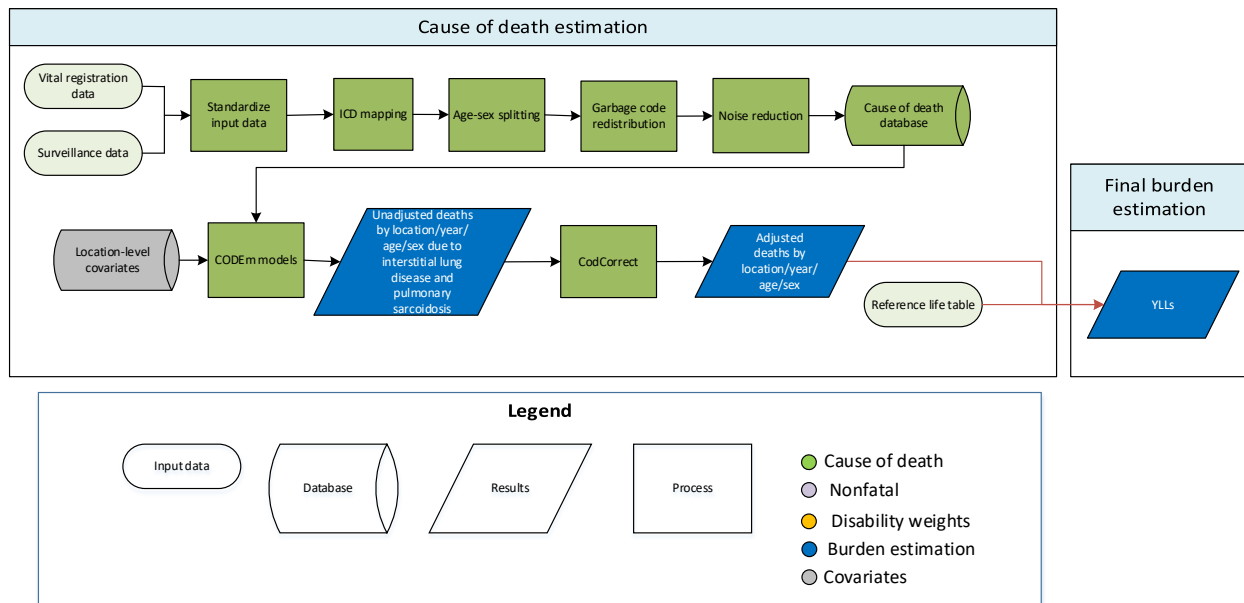

## Input data

Data used to estimate interstitial lung disease and pulmonary sarcoidosis mortality included vital registration and surveillance data from the cause of death (COD) database. Our outlier criteria excluded data points that (1) were implausibly high or low, (2) substantially conflicted with established age or temporal patterns, or (3) substantially conflicted with other data sources conducted from the same locations or locations with similar characteristics (ie, Socio-demographic Index).

## Modelling strategy

The standard CODEm modelling approach was applied to estimate deaths due to interstitial lung disease and pulmonary sarcoidosis. Separate models were conducted for male and female mortality, and the age range for both models was 1–95+ years.

## Key Changes from GBD 2017

- We added estimates for the following new locations: Monaco, San Marino, Cook Islands, Nauru, Niue, Palau, Tokelau, Tuvalu, Monaco, San Marino, St Kitts and Nevis
- We added subnational location data for the following: Italy, Poland, Pakistan, the Philippines, and Nigeria
- We removed the covariate for the population density and added a covariate for the proportion of employed population working in professional occupations.
- The direction for the socio-demographic index covariate was changed from no direction to a negative in 2019.

The following covariates were used for GBD 2019:

| Level | Covariate                                             | Direction |
|-------|-------------------------------------------------------|-----------|
| 1     | log-transformed SEV scalar: interstitial lung disease | +         |
|       | smoking prevalence                                    | +         |
|       | cumulative cigarettes (5 years)                       | +         |
|       | occupational professionals                            | -         |
| 2     | elevation over 1,500m (proportion)                    | +         |
|       | elevation between 500 and 1,500m (proportion)         | +         |
|       | indoor air pollution (all cooking fuels)              | +         |
|       | outdoor air pollution (PM <sub>2.5</sub> )            | +         |
|       | healthcare access and quality index                   | -         |
| 3     | log LDI (I\$ per capita)                              | -         |
|       | education (years per capita)                          | -         |
|       | socio-demographic index                               | -         |

Interstitial lung disease and pulmonary sarcoidosis is a “child” disease that is fit into an overall chronic respiratory disease model. The unadjusted death estimates from interstitial lung disease and pulmonary sarcoidosis are summed alongside other “child” causes (chronic obstructive pulmonary disease, asthma, and pneumoconiosis) and fit to the distribution of deaths in an overall chronic respiratory disease “parent” model as part of the CODCorrect adjustment process. This results in deaths recorded using non-specific coding systems, such as verbal autopsy, being included in the parent model and redistributed to the child models proportionately.

## Covariate Influences:

The following plots show the influence of each covariate on the four CODEm models (male global, male data rich, female global, and female data rich). A positive standardized beta (to the right) means that the covariate was associated with increased death. A negative standardized beta (to the left) means the covariate was associated with decreased death.

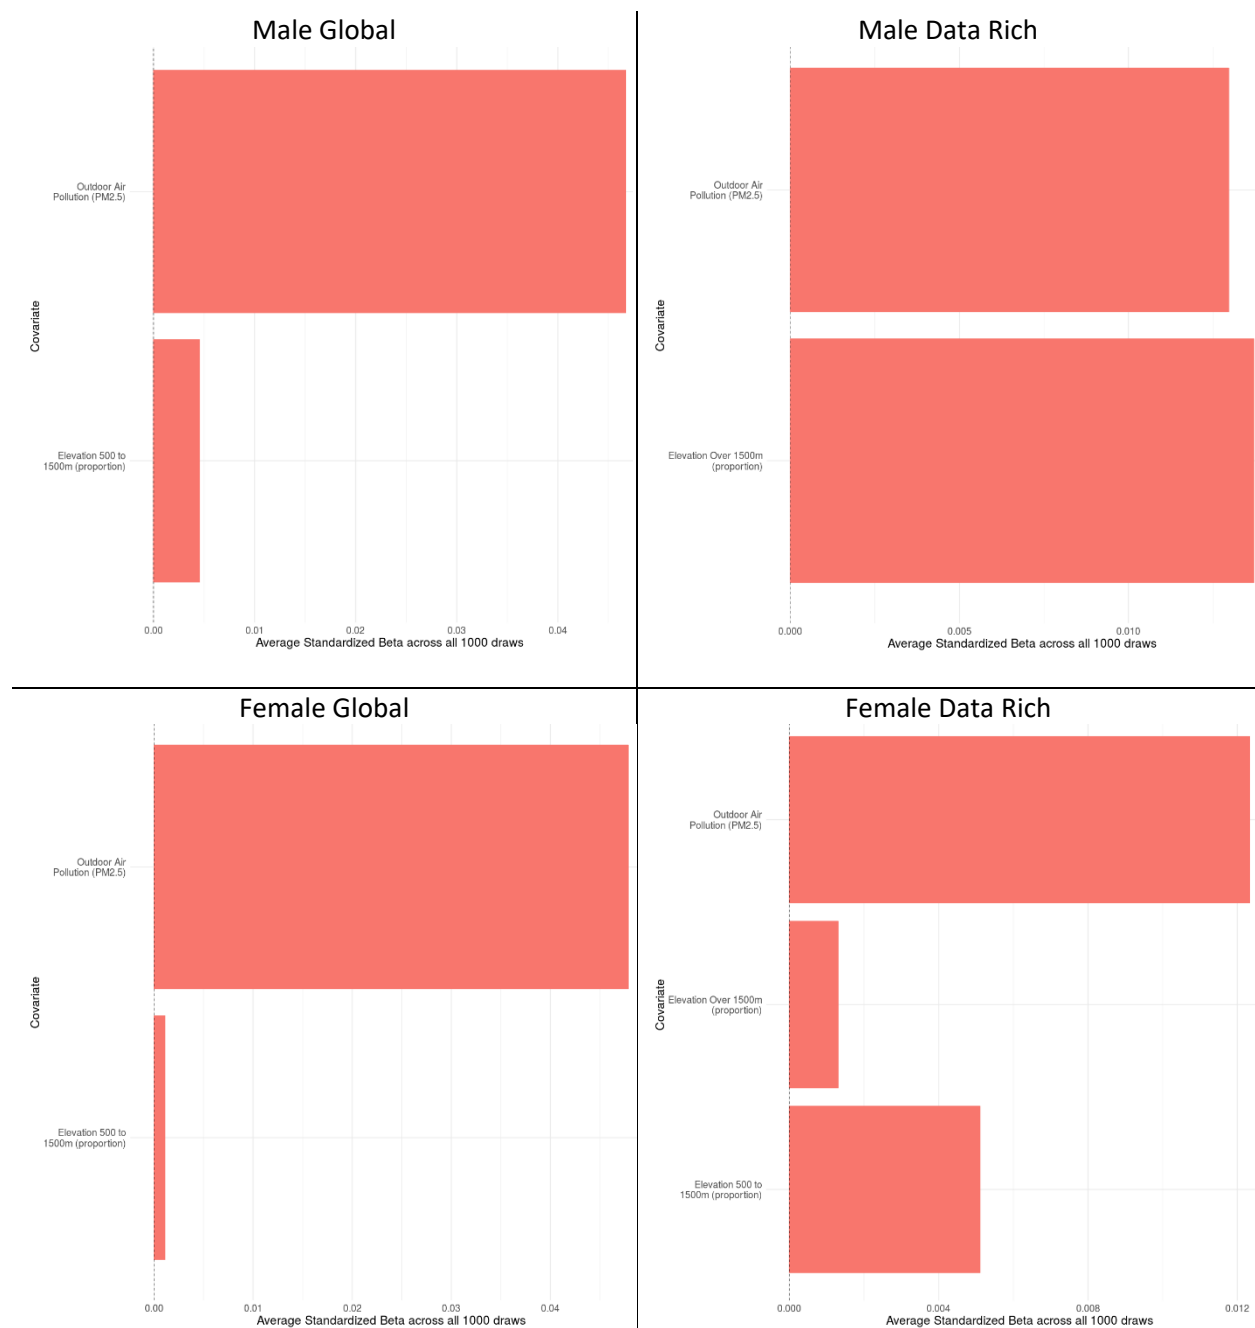

## Other Chronic Respiratory Diseases

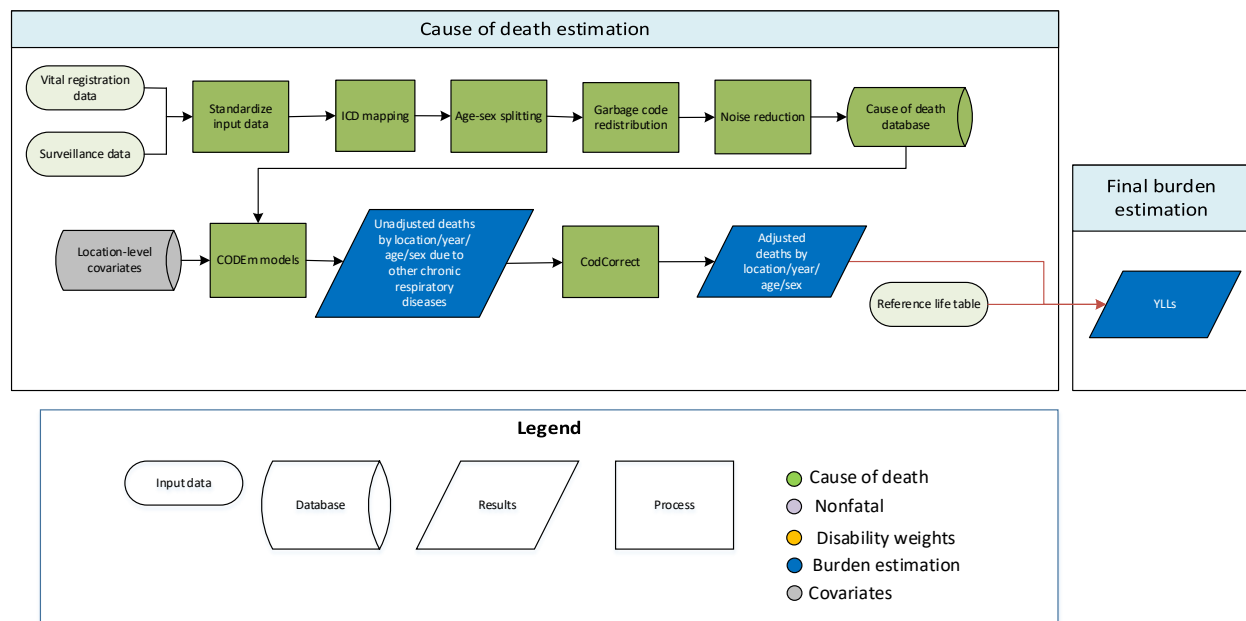

### Input data

Data used to estimate other chronic respiratory diseases included vital registration and surveillance data from the cause of death (COD) database. Our outlier criteria excluded data points that (1) were implausibly high or low, (2) substantially conflicted with established age or temporal patterns, or (3) substantially conflicted with other data sources conducted from the same locations or locations with similar characteristics (ie, Socio-demographic Index).

### Modelling strategy

The standard CODEm modelling approach was applied to estimate deaths due to other chronic respiratory diseases. Separate models were conducted for male and female mortality, and the age range for both models was 1 year to 95+ years.

### Key Changes from GBD 2017

- We removed the log transformed SEV and changed log income per capita into a 10 year-lagged income per capita.

The following covariates were used for GBD 2019:

| Level | Covariate                                | Direction |
|-------|------------------------------------------|-----------|
| 1     | smoking prevalence                       | +         |
|       | cumulative cigarettes (5 years)          | +         |
|       | indoor air pollution (all cooking fuels) | +         |

|   |                                                                |   |
|---|----------------------------------------------------------------|---|
|   | outdoor air pollution (PM <sub>2.5</sub> )                     | + |
| 2 | elevation over 1,500m (proportion)                             | + |
|   | elevation between 500 and 1,500m (proportion)                  | + |
|   | population density over 1,000 ppl/km <sup>2</sup> (proportion) | + |
|   | healthcare access and quality index                            | - |
| 3 | LDI (I\$ per capita)                                           | - |
|   | education (years per capita)                                   | - |
|   | socio-demographic Index                                        | - |

Other chronic respiratory is a “child” cause that is fit into an overall chronic respiratory disease model. The unadjusted death estimates from Other chronic respiratory are summed alongside unadjusted estimates for other “child” causes (chronic obstructive pulmonary disease, interstitial lung disease and pulmonary sarcoidosis, pneumoconiosis and asthma) and fit to the distribution of deaths in an overall chronic respiratory disease “parent” model. This results in deaths recorded using non-specific coding systems, such as verbal autopsy, being included in the parent model and redistributed to the child models proportionately.

## Covariate Influences:

The following plots show the influence of each covariate on the four CODEm models (male global, male data rich, female global, and female data rich). A positive standardized beta (to the right) means that the covariate was associated with increased death. A negative standardized beta (to the left) means the covariate was associated with decreased death.

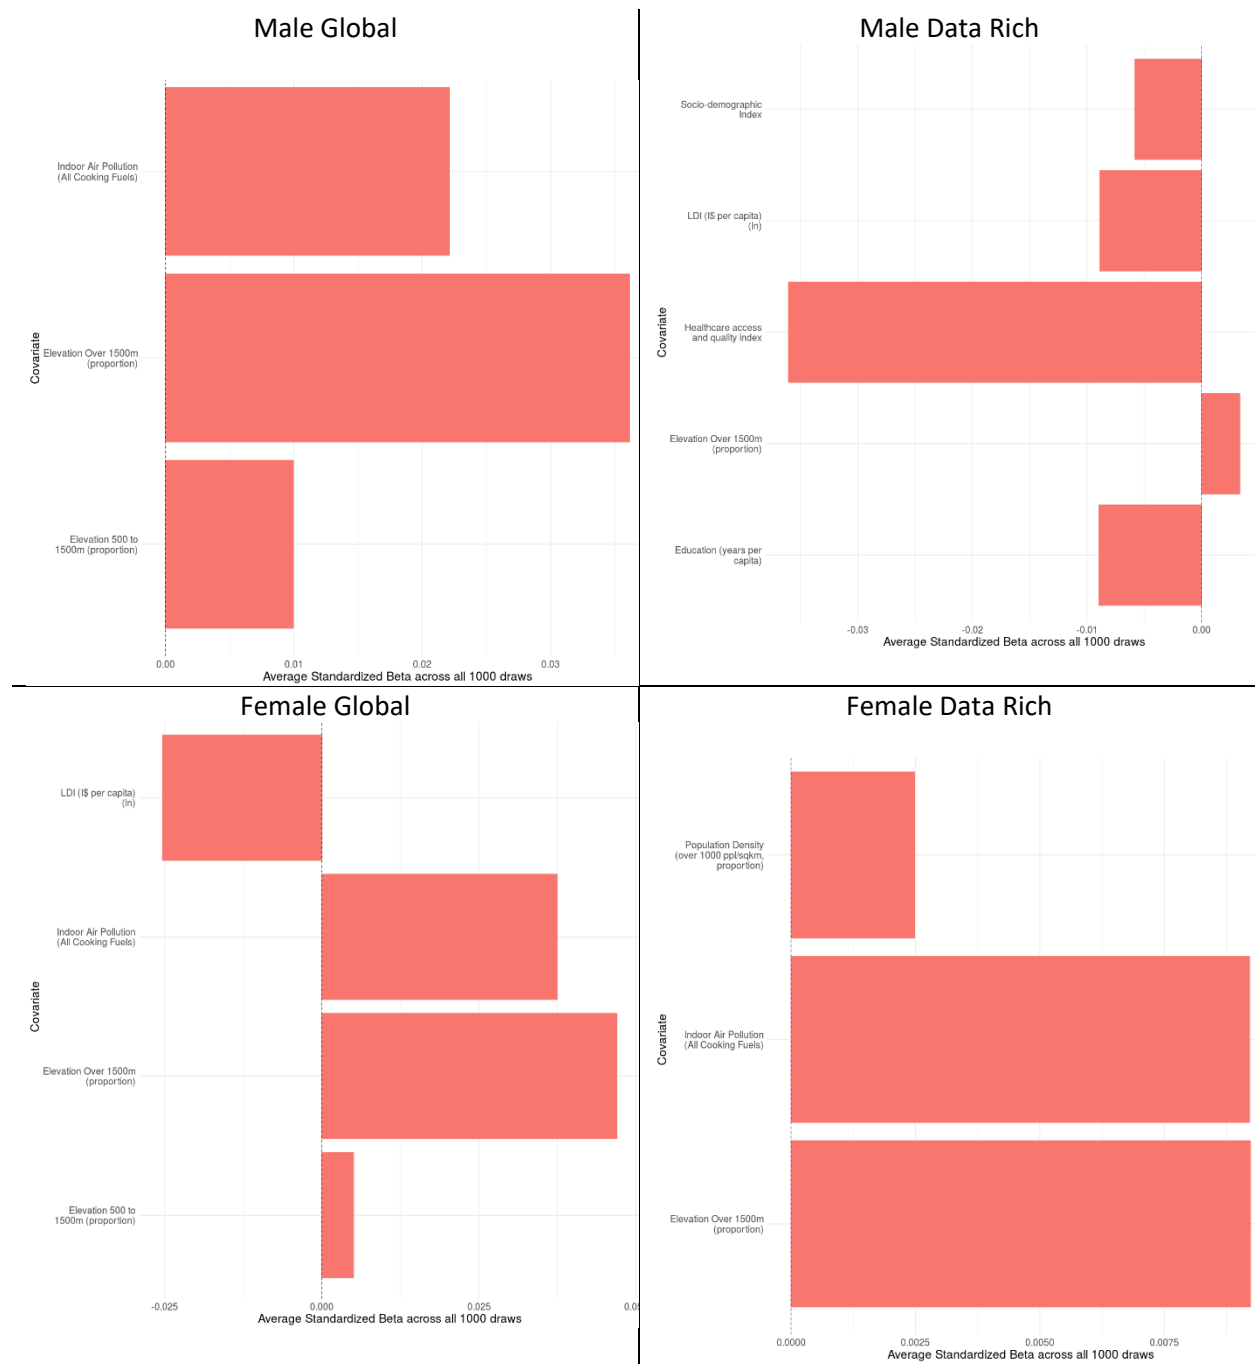

# Non-fatal modeling descriptions

## Chronic obstructive pulmonary disease (COPD)

### Flowchart

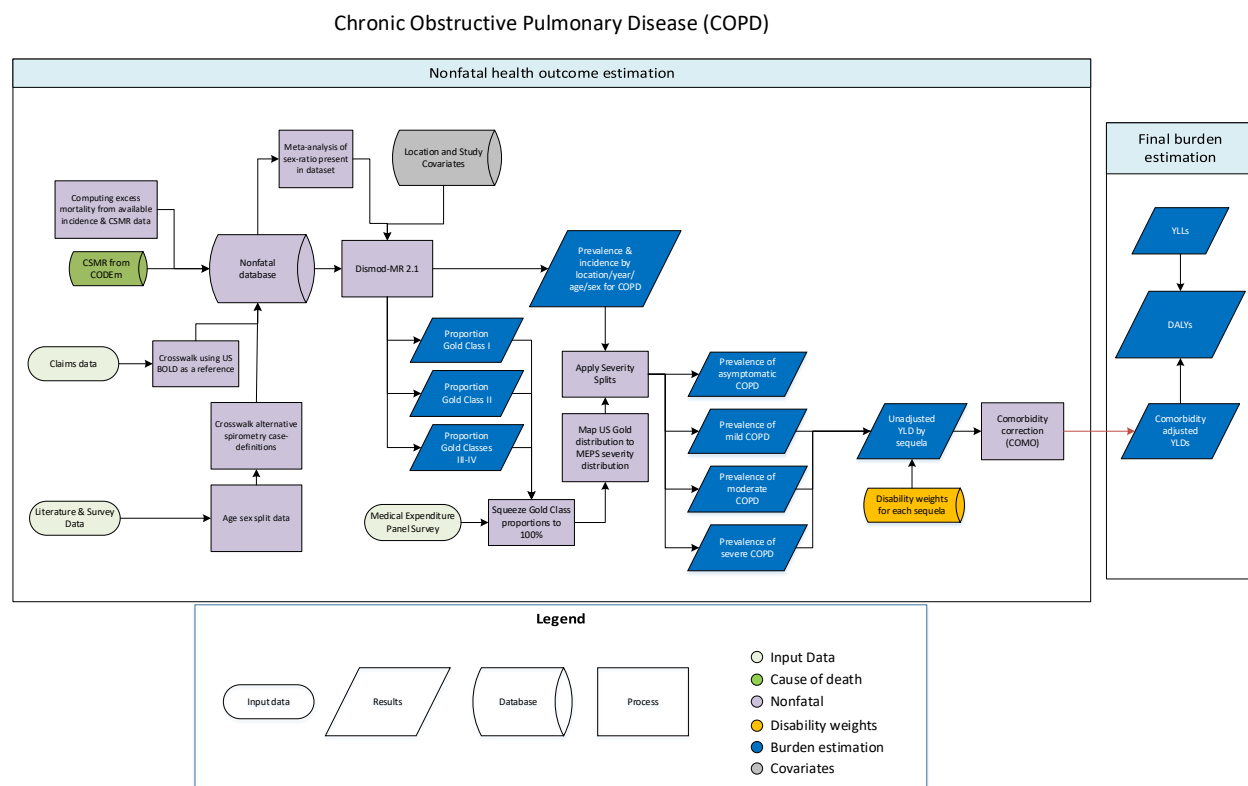

### Case definition

COPD is defined as in the Global Initiative for Chronic Obstructive Lung Disease (GOLD) classification: a measurement of  $<0.7$   $FEV_1/FVC$  (one second of forceful exhalation/total forced expiration) on spirometry after bronchodilation. The severity grading of COPD follows this GOLD class definition.

| GOLD CLASS   | $FEV_1$ Score         |
|--------------|-----------------------|
| I: Mild      | $\geq 80\%$ of normal |
| II: Moderate | 50-79% of normal      |
| IV: Severe   | $<50\%$ of normal     |

ICD-10 codes associated with COPD include J41, J42, J43, J44, and J47. The corresponding ICD-9 codes are 491-492, and 496. J40 & 490 (Bronchitis, not specified as acute or chronic) and J47 & 494 (Bronchiectasis) were removed from COPD mapping in GBD 2017.

Alternative case definitions that differ from the GOLD Post-bronchodilation definition are as follows: GOLD Pre-bronchodilation, Lower Limit of Normal (LLN) Post-bronchodilation, LLN Pre-bronchodilation, and European Respiratory Society (ERS) guidelines. These are all different methods of evaluating whether an individual has COPD.

## Input data

No systematic review of the literature was completed for GBD 2019; however, for GBD 2016, we updated the systematic review from previous iterations. The full search term was:

*(chronic obstructive pulmonary disease[Title/Abstract] AND (prevalence[Title/Abstract] or incidence [Title/Abstract] or mortality [Title/Abstract] or death [Title/Abstract]) AND "Cross-Sectional Studies"[MeSH Terms]) Filters: Publication date from 04/01/2015 to 11/01/2016; Humans*

COPD has the following data sources

- Prevalence, incidence, and remission data from literature
- Hospital claims data
- Proportion data of GOLD class severities
- Burden of Obstructive Lung Disease (BOLD) Study data

Prevalence, incidence, and remission data relating to COPD are extracted from literature provided by collaborators or found with a systematic review. All data include spirometry-based measures. Other data come from hospital claims data for nonfatal estimation and vital registrations for cause of death.

GOLD class proportions are extracted from literature when the severity is available. Our models estimate three separate severities:

- Mild COPD: GOLD class I
- Moderate COPD: Gold class II
- Severe COPD: Gold class III & IV

These severities are used in the modelling process to split COPD by severities.

The Burden of Obstructive Lung Disease (BOLD) data is specifically notable because of its use in bias adjustments described in the data processing section.

New data this year include the English Longitudinal Study of Aging (ELSA), and claims data for the United States. Additional information on the claims data collection and pre-corrections are provided elsewhere. Briefly, we determined USA national and state-level estimates of COPD prevalence from a database of individual-level ICD-coded health service encounters. Persons with any inpatient claim or at least two outpatient claims associated with COPD were marked as a prevalent case for that year.

### Data Inputs for Chronic Obstructive Pulmonary Disease

| Measure       | Total sources | Countries with data |
|---------------|---------------|---------------------|
| All measures  | 166           | 57                  |
| Prevalence    | 142           | 54                  |
| Incidence     | 6             | 6                   |
| Relative risk | 2             | 2                   |
| Proportion    | 36            | 32                  |

## Data Processing

### *Age-Sex and Sex Split*

In some cases, data are reported by only age or only sex, but not both. For example, a study may have included the prevalence of males and females with COPD and then separately reported the prevalence for both sexes in smaller age bins (e.g. age 40-45, 46-50, etc.) that have COPD. In these cases, we perform an age-sex split by utilizing proportions within the study to disaggregate the data.

When data are not disaggregated into male and female categories for a given data source, we instead perform a sex-split on the data by applying sex proportions from other studies that do have male and female specific data. When data are aggregated into age categories larger than 25 years, we split into smaller age bins based on super-regional age patterns in the 2017 COPD model.

### *Modeled excess mortality data*

For GBD 2019, we implemented a new method of modeling excess mortality rate (EMR).

In previous rounds, priors on EMR were estimated in DisMod by matching prevalence data points with their corresponding CSMR values within the same age, sex, year, location (by dividing CSMR by prevalence).

However, for many causes, DisMod estimated a rather unrealistic pattern of EMR compared to an expected pattern of decreasing EMR with greater access to quality health care. Such unexpected patterns often signal inconsistencies between CSMR estimates and the measures of prevalence and/or incidence.

In an effort to provide greater guidance to DisMod on the expected pattern of EMR, EMR data generated in the previous round were used as inputs for modeling in MR-BRT with age, sex, and healthcare access and quality index (HAQi) included as covariates. Results from MR-BRT were then predicted for each location year, sex and for ages 0, 10, 20 ....100.

This method led to improvements in the consistency of EMR relative to health care access. We also included HAQi as a country-level covariate in DisMod to inform EMR with the mean and standard deviation produced from MR-BRT analysis.

### *Bias Adjustments*

In GBD 2019, we improved the bias adjustment methods by utilizing a MR-BRT model outside of DisMod to allow a more direct comparison between different case definitions and/or study designs. In GBD 2017, these adjustments were performed within DisMod.

We made a series of adjustments to data that do not completely match our case definition. Different diagnosis often leads to different estimates of COPD. Similarly, claims data is subject to biases. Claims data are often systemically lower than survey data, probably due to selection bias with regard to socioeconomic status. Adjustments are made to these data to correct these biases.

The adjustment is a logit-transformation method in MR-BRT. The general process is described below:

1. Identify data points with overlapping year, age, sex, and location between reference and alternative definitions.
2. Logit transform overlapping data points of alternative and reference case definitions
3. Convert overlapping data points into a difference in logit space using the following equation:  

$$\text{logit}(\text{altnerative}) - \text{logit}(\text{reference})$$
4. Use the delta method to compute standard errors of overlapping data points in logit space, then calculate standard error of logit difference using the following equation:  

$$\sqrt{(\text{variance of alternative}) + (\text{variance of reference})}$$
5. Using MR-BRT, conduct a random effects meta-regression to obtain the pooled logit difference of alternative to reference
6. Apply the pooled logit difference to all data points of alternative case definitions using the following equation:  

$$\text{new}_{\text{estimate}} = \text{inverse.logit}((\text{logit}(\text{alternative})) - (\text{pooled logit difference}))$$
7. Calculate new standard errors using the delta method, accounting for gamma (between-study heterogeneity)

Data derived from claims from commercial health insurance in the United States were also adjusted using a factor estimated in MR-BRT. Claims data, notably US MarketScan was adjusted in relation to the BOLD study data. In this case, the BOLD data serves as the reference definition while the marketscan data are the alternative definition.

#### MR-BRT Crosswalk Adjustment Factors

| Data input | Status | Gamma | Beta Coefficient, Logit<br>(95% CI) | Adjustment factor*    |
|------------|--------|-------|-------------------------------------|-----------------------|
| GOLD Post  | Ref    | 0.25  | ---                                 | ---                   |
| GOLD Pre   | Alt    |       | 0.50<br>(-0.02 - 1.07)              | 0.62<br>(0.49 - 0.74) |
| ERS        | Alt    |       | 0.70<br>(0.11 - 1.31)               | 0.67<br>(0.53 - 0.79) |
| LLN Pre    | Alt    | 0.08  | 0.10<br>(0.01 - 0.19)               | 0.52<br>(0.50 - 0.55) |
| LLN Post   |        |       | -0.34<br>(-0.50 - -0.19)            | 0.42<br>(0.38 - 0.45) |
| BOLD       | Ref    | .19   | ---                                 | ---                   |
| MarketScan | Alt    |       | -1.93<br>(-2.35 - -1.50)            | 0.13<br>(0.08 - 0.18) |

\*Adjustment factor is the inverse-logit transformed Beta coefficient; <0.5 represents that alternative is adjusted upward; >0.5 represents alternative is adjusted downward

## Modelling strategy

The estimation of COPD burden has two distinct steps.

1. Estimate prevalence and incidence using a DisMod-MR 2.1 model
2. Estimate proportion of COPD severities using GOLD class groupings in DisMod-MR 2.1

After these two steps, the COPD prevalence and incidence is split by age, sex, location for each severity level.

### Step 1: Main COPD model – Estimate prevalence and incidence using DisMod-MR 2.1

#### Model Settings

We set remission to 0 because individuals do not recover once they have COPD. The symptoms are only managed. Incidence ceiling is set at .0002 before age 15 and a ceiling at .0005 before age 30 to avoid a kick-up of estimates in age ranges with few or no primary data.

Each model includes a series of country-level covariates that describe spatiotemporal patterns.

- COPD standardised exposure variables (SEV) aggregates multiple risk factors into a single variable.
- Healthcare Access and Quality (HAQi) index on EMR to capture country-level variation of EMR, assuming a negative coefficient (ie, lower mortality with rising GDP and HAQ). The priors of HAQi came from the EMR MRBRT prediction.
- The proportion of elevation over 1500m was included as a country-level covariate on EMR because of its significance in COPD cause of death models.

#### Model coefficients for COPD

| Model | Variable name                         | Measure               | Beta                         | Exponentiated         |
|-------|---------------------------------------|-----------------------|------------------------------|-----------------------|
| COPD  | Elevation over 1500m (proportion)     | excess mortality rate | 0.60<br>( 0.14 — 0.95)       | 1.81<br>(1.15 — 2.58) |
| COPD  | Healthcare access and quality index   | excess mortality rate | -0.022<br>( -0.023 — -0.022) | 0.98<br>(0.98 — 0.98) |
| COPD  | Log age-standardised SEV scalar: COPD | prevalence            | 0.91<br>( 0.90 — 0.92)       | 2.47<br>(2.46 — 2.50) |

### Step 2: GOLD class models to estimate proportions of severities

The GOLD class models use data from surveys that specified prevalence by GOLD class after expressing the values as a proportion of all COPD cases. For GBD 2016 we used fixed effects from the SEV scalar and the log of lag-distributed income (LDI) per capita to assist estimation. For GBD 2017, we dropped these covariates because they did not produce significant coefficients and also did not use them for GBD 2019. We also restricted random effects to +/-0.5 to control implausible geographical variation.

## Severity Splits

The three GOLD class groupings reflect a grading based on a physiological measurement rather than a direct measurement of disease severity. In order to map the epidemiological findings by GOLD class into

the three COPD health states for which we have disability weights (DW), we used the 2001–2011 Medical Expenditure Panel Survey (MEPS) data from the United States. Specifically, we convert the GOLD class designations estimated for the USA in 2005 (the midpoint of MEPS years of analyses) into GBD classifications of asymptomatic, mild, moderate, and severe COPD.

The table below shows the three health states of COPD and the corresponding lay descriptions and disability weights. The graph shows the average proportion by GOLD class (after scaling to 100%) across all ages for USA in 2005. We also show the proportion of MEPS respondents reporting any health service contact in the past year for COPD with a DW value attributable to COPD of 0, mild range (0 to midpoint between DWs for mild and moderate), moderate range (midpoint of DW values mild and moderate to midpoint of DW values for moderate and severe) and severe range (midpoint between DW values moderate and severe or higher). The DW value for COPD was derived from a regression with indicator variables for all health states reported by MEPS respondents and their reported overall level of disability derived from a conversion of 12-Item Short Form Surveys (SF-12) answers to GBD DW values. This analysis gave the severity distribution for each GBD cause reported in MEPS after correcting for any comorbid causes individual respondents reported during a year.

#### Description of Health States

| Health state  | Lay description                                                                                                                                                                                       | DW (95% CI)            |
|---------------|-------------------------------------------------------------------------------------------------------------------------------------------------------------------------------------------------------|------------------------|
| Mild COPD     | This person has cough and shortness of breath after heavy physical activity, but is able to walk long distances and climb stairs.                                                                     | 0.019<br>(0.011–0.033) |
| Moderate COPD | This person has cough, wheezing, and shortness of breath, even after light physical activity. The person feels tired and can walk only short distances or climb only a few stairs.                    | 0.225<br>(0.153–0.31)  |
| Severe COPD   | This person has cough, wheezing, and shortness of breath all the time. The person has great difficulty walking even short distances or climbing any stairs, feels tired when at rest, and is anxious. | 0.408<br>(0.273–0.556) |

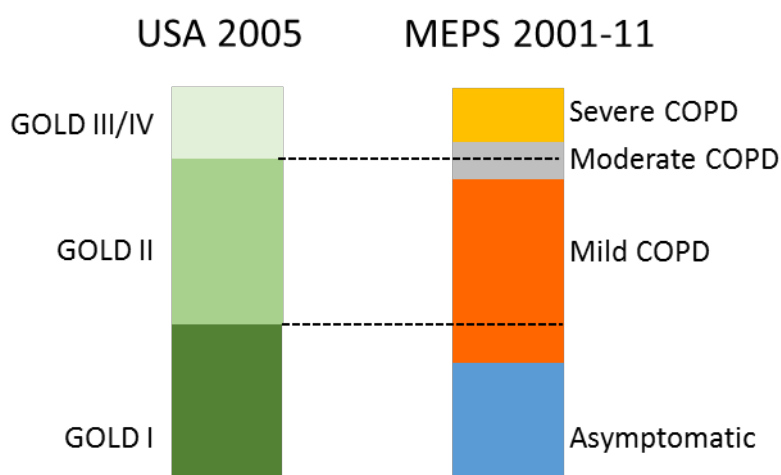

The algorithm to translate GOLD class to COPD DW categories first assigns GOLD III&IV to severe COPD and what remains to moderate. Next, GOLD class I is assigned to the asymptomatic category first and what remains goes to mild COPD. This algorithm is repeated for each age and sex category and for all 1,000 draws from the DisMod models of GOLD classes and the MEPS analyses. We end up with proportions of each of the GOLD class categories that map onto GBD COPD health states with uncertainty bounds determined by the 25<sup>th</sup> and 975<sup>th</sup> values of the 1,000 draws. These values are then applied to the estimates of the proportion of cases by GOLD class category, after scaling to 100%, by location, year, age, and sex. This assumes that the relationship between GOLD class and GBD COPD health states in the United States applies everywhere.

# Pneumoconiosis

## Coal Worker's Pneumoconiosis, Asbestosis, Silicosis, and Other Pneumoconiosis

### Flowchart

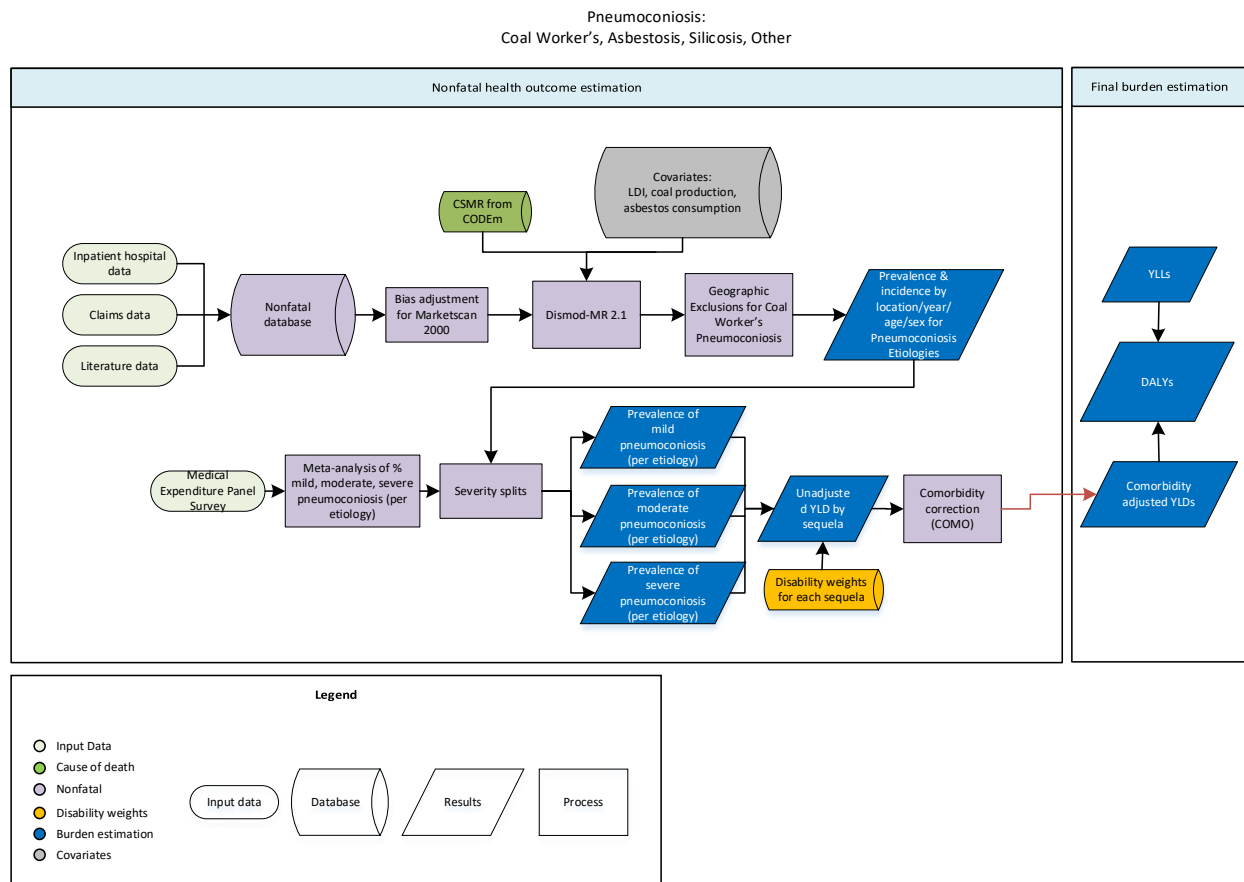

### Input data and methodological appendix

#### Case definition

Pneumoconiosis is a chronic lung disease characterized by lung scarring and other interstitial damage caused by exposure to dust and other contaminants – usually through occupational exposure. For GBD, we model pneumoconiosis by exposure type: coal, asbestos, silica, and other.

#### Input data

Data used to make estimates of pneumoconiosis come from two sources: inpatient hospital reports, and hospital claims data. For GBD 2019, new claims data were added for the U.S. for the years 2015 and 2016.

## Data Inputs for Pneumoconiosis

| Cause/Impairment Name       | Measure      | Total sources | Countries with data |
|-----------------------------|--------------|---------------|---------------------|
| Pneumoconiosis              | All measures | 309           | 44                  |
| Pneumoconiosis              | Prevalence   | 294           | 44                  |
| Pneumoconiosis              | Proportion   | 15            | 1                   |
| Asbestosis                  | All measures | 279           | 37                  |
| Asbestosis                  | Prevalence   | 279           | 37                  |
| Coal workers pneumoconiosis | All measures | 251           | 35                  |
| Coal workers pneumoconiosis | Prevalence   | 251           | 35                  |
| Other pneumoconiosis        | All measures | 259           | 41                  |
| Other pneumoconiosis        | Prevalence   | 259           | 41                  |

## Data Processing

### Bias Adjustments

In GBD 2019, we improved the bias adjustment methods by utilizing a MR-BRT model outside of DisMod to allow a more direct comparison between different case definitions and/or study designs.

For the pneumoconiosis, adjusted U.S. MarketScan claims data collected in the year 2000 to all other U.S. MarketScan data. To do so, we used the logit difference for data points from reference (non-2000 claims data) and alternative (2000 claims data) matched on age, sex and location as input into MR-BRT.

The adjustment is a logit-transformation method in MR-BRT. The general process is described below:

1. Identify data points with overlapping age, sex, and location between reference and alternative definitions.
2. Logit transform overlapping data points of alternative and reference case definitions
3. Convert overlapping data points into a difference in logit space using the following equation:  

$$\text{logit}(\text{alternative}) - \text{logit}(\text{reference})$$
4. Use the delta method to compute standard errors of overlapping data points in logit space, then calculate standard error of logit difference using the following equation:  

$$\sqrt{(\text{variance of alternative}) + (\text{variance of reference})}$$
5. Using MR-BRT, conduct a random effects meta-regression to obtain the pooled logit difference of alternative to reference
6. Apply the pooled logit difference to all data points of alternative case definitions using the following equation:  

$$\text{new}_{\text{estimate}} = \text{inverse.logit}((\text{logit}(\text{alternative})) - (\text{pooled logit difference}))$$
7. Calculate new standard errors using the delta method, accounting for gamma (between-study heterogeneity)

The coefficients for bias adjustments are shown below:

### MR-BRT Crosswalk Adjustment Factor: Asbestosis

| Data input | Status | Gamma | Beta Coefficient, Logit (95% CI) | Adjustment factor* |
|------------|--------|-------|----------------------------------|--------------------|
|------------|--------|-------|----------------------------------|--------------------|

|                       |     |     |                        |      |
|-----------------------|-----|-----|------------------------|------|
| Marketscan (not 2000) | Ref |     | ---                    | ---  |
| Marketscan 2000       | Alt | 0.0 | -0.25 (-0.36 to -0.15) | 0.44 |

*\*Adjustment factor is the inverse-logit transformed Beta coefficient; <0.5 represents that alternative is adjusted upward; >0.5 represents alternative is adjusted downward*

#### **MR-BRT Crosswalk Adjustment Factor: Coal Worker's Pneumoconiosis**

| Data input            | Status | Gamma | Beta Coefficient, Logit (95% CI) | Adjustment factor* |
|-----------------------|--------|-------|----------------------------------|--------------------|
| Marketscan (not 2000) | Ref    |       | ---                              | ---                |
| Marketscan 2000       | Alt    | 0.0   | -0.34 (-0.76 to 0.07)            | 0.42               |

*\*Adjustment factor is the inverse-logit transformed Beta coefficient; <0.5 represents that alternative is adjusted upward; >0.5 represents alternative is adjusted downward*

#### **MR-BRT Crosswalk Adjustment Factor: Silicosis**

| Data input            | Status | Gamma | Beta Coefficient, Logit (95% CI) | Adjustment factor* |
|-----------------------|--------|-------|----------------------------------|--------------------|
| Marketscan (not 2000) | Ref    |       | ---                              | ---                |
| Marketscan 2000       | Alt    | 0.0   | -0.48 (-1.91 to 0.96)            | 0.38               |

*\*Adjustment factor is the inverse-logit transformed Beta coefficient; <0.5 represents that alternative is adjusted upward; >0.5 represents alternative is adjusted downward*

#### **MR-BRT Crosswalk Adjustment Factor: Other Pneumoconiosis**

| Data input            | Status | Gamma | Beta Coefficient, Logit (95% CI) | Adjustment factor* |
|-----------------------|--------|-------|----------------------------------|--------------------|
| Marketscan (not 2000) | Ref    |       | ---                              | ---                |
| Marketscan 2000       | Alt    | 0.0   | 0.14 (-0.32 to 0.59)             | 0.53               |

*\*Adjustment factor is the inverse-logit transformed Beta coefficient; <0.5 represents that alternative is adjusted upward; >0.5 represents alternative is adjusted downward*

#### *Modeled excess mortality data*

As part of iteration of estimates for all pneumoconioses, we tested a new method of modeling excess mortality rate (EMR) that was not used in the final model.

In previous rounds, priors on EMR were estimated in DisMod by matching prevalence data points with their corresponding CSMR values within the same age, sex, year, location (by dividing CSMR by prevalence). For short duration conditions (remission>1), the corresponding prevalence was derived by running an initial model and then applying the same CSMR/prevalence method.

However, for many causes, DisMod estimated a rather unrealistic pattern of EMR compared to an expected pattern of decreasing EMR with greater access to quality health care. Such unexpected patterns often signal inconsistencies between CSMR estimates and the measures of prevalence and/or incidence.

In effort to provide greater guidance to DisMod on the expected pattern of EMR, EMR data generated in the previous round were used as inputs in MR-BRT modeling with age, sex, and healthcare access and quality index (HAQi) included as covariates. Results from MR-BRT were then predicted for each location year, sex and for ages 0, 10, 20 ....100.

While this method led to some improvements in the consistency of EMR relative to health care access, the resulting prevalence estimates were unrealistic. We decided to continue using the DisMod EMR estimations while keeping HAQi as a country-level covariate to inform EMR with a mean and standard deviation produced from MR-BRT.

This method was utilized for all pneumoconiosis: asbestosis, coal worker's pneumoconiosis, silicosis, and other pneumoconiosis.

## Modelling strategy

Estimates for the pneumoconioses are produced using a standard DisMod-MR 2.1 approach.

For all aetiologies, we use prior settings of zero remission. Additionally, we assume no incidence and prevalence before the age of 15. We include a predictive covariate on healthcare access and quality. Location random effects are set at -20 to 20 for prevalence and incidence hazard to reflect large location variations.

Covariates on Asbestos, Mesothelioma, and coal production were removed in GBD 2019.

| Cause         | Measure          | Variable name                                             | Beta                            | Exponentiated         |
|---------------|------------------|-----------------------------------------------------------|---------------------------------|-----------------------|
| Asbestosis    | Prevalence       | Asbestos consumption (per capita)                         | 0.47<br>(0.015–1.70)            | 1.60<br>(1.02–5.47)   |
| Asbestosis    | Prevalence       | Log-transformed age-standardised SEV scalar: Mesothelioma | 0.029<br>(0.000016–0.32)        | 1.03<br>(1.00–1.38)   |
| Asbestosis    | Excess Mortality | Healthcare access and quality index                       | -0.025<br>( -0.025 — -0.024)    | 0.98<br>(0.98 — 0.98) |
| Coal worker's | Prevalence       | Coal production (per capita)                              | 0.0017<br>( -0.00025 to 0.0045) | 1.00<br>(1.00–1.00)   |
| Coal Worker's | Excess Mortality | Healthcare Access and Quality index                       | -0.07809                        | 0.013502              |

## Severity Split Inputs

Data to inform estimates of the severity gradient due to pneumoconiosis etiologies are derived from previous analyses of the Medical Expenditure Panel Survey (MEPS). The disability weights are shared by all aetiologies.

| Severity level | Lay description                                                                                                                                                                           | DW (95% CI)            | Severity Distributions |
|----------------|-------------------------------------------------------------------------------------------------------------------------------------------------------------------------------------------|------------------------|------------------------|
| Asymptomatic   |                                                                                                                                                                                           |                        | 23.0%<br>(20.8 – 25.0) |
| Mild           | Has cough and shortness of breath after heavy physical activity, but is able to walk long distances and climb stairs.                                                                     | 0.019<br>(0.011–0.033) | 34.2%<br>(26.4 – 37.5) |
| Moderate       | Has cough, wheezing, and shortness of breath, even after light physical activity. The person feels tired and can walk only short distances or climb only a few stairs.                    | 0.225<br>(0.153–0.312) | 13.3%<br>(9.7 – 19.4)  |
| Severe         | Has cough, wheezing, and shortness of breath all the time. The person has great difficulty walking even short distances or climbing any stairs, feels tired when at rest, and is anxious. | 0.408<br>(0.273–0.556) | 29.5<br>(20.8 – 36.1)  |

### *Geographical Exclusions*

In GBD 2019, we set estimates for coal worker’s pneumoconiosis to zero prevalence for any location with no coal production for all years. This exclusion was applied after running a DisMod model. The assumption here is that coal worker’s pneumoconiosis should be near zero in areas where there is no coal production.

# Asthma

## Flowchart

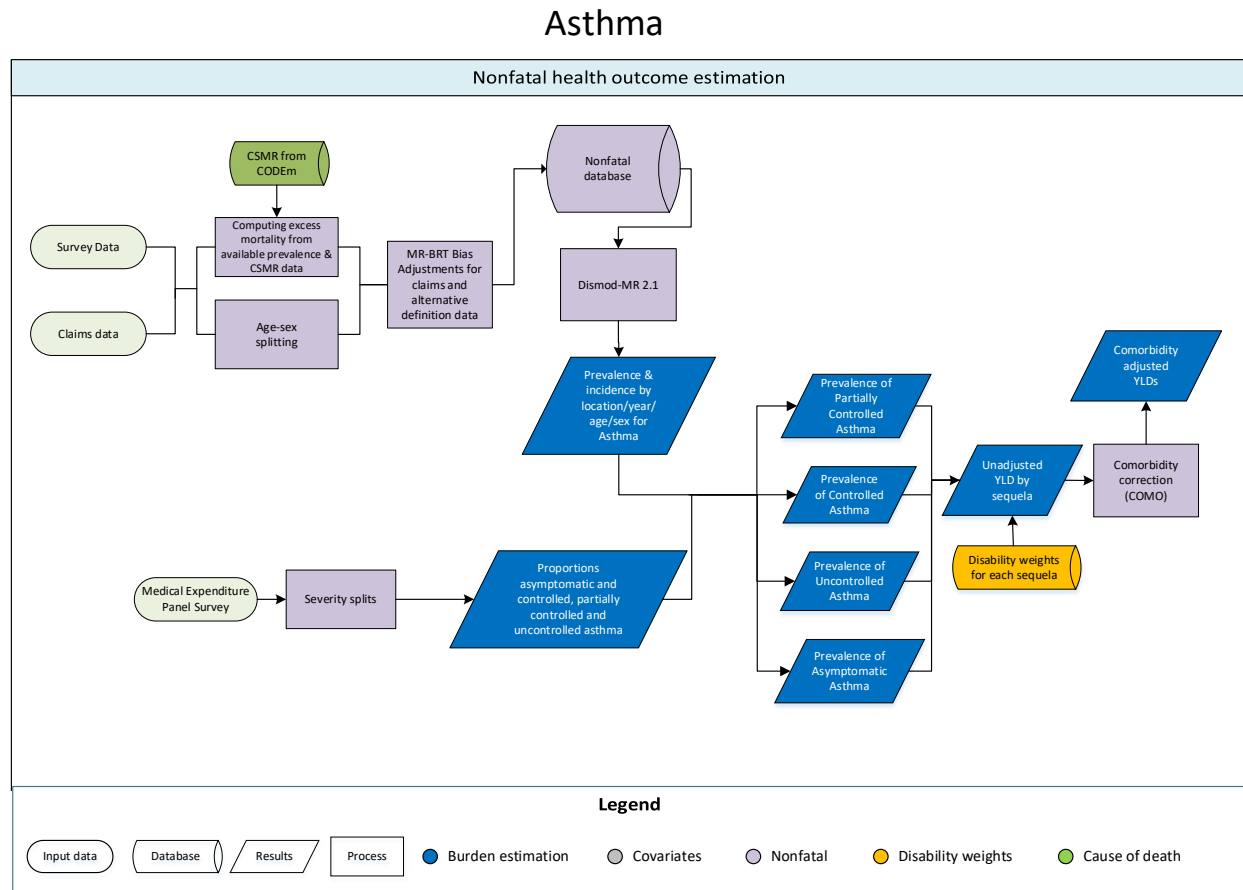

## Case definition

Asthma is a chronic lung disease marked by spasms in the bronchi usually resulting from an allergic reaction or hypersensitivity and causing difficulty in breathing. We define asthma as a doctor's diagnosis and wheezing in the past year. The relevant ICD-10 codes are J45 and J46. ICD-9 code is 493.

Alternative case definitions include the following:

- Self-reported Asthma in the past year
- Self-reported Asthma ever
- Only a doctor's diagnosis in the past year
- Only wheezing in the past year

## Input data

The last full systemic review of the literature on Asthma was done for GBD 2016. The following search string was used in PubMed and filtered by studies of humans published between January 2012 and November 2016.

(Asthma[Title/Abstract] AND prevalence[Title/Abstract] AND "Cross-Sectional Studies"[MeSH Terms])

Data in literature matching our case definitions were extracted. Those that had definitions outside our alternative case definitions were not included. In addition to claims data used in GBD 2017, we added new USA claims data for the years 2015 and 2016. We also added new data for Wave 7 of the English Longitudinal Study of Ageing (ELSA). Surveys carried out as part of the International Study of Asthma and Allergies in Childhood (ISAAC) collaboration are the most important source of prevalence data in children.

#### Data Inputs for Asthma

| Measure                       | Total sources | Countries with data |
|-------------------------------|---------------|---------------------|
| All measures                  | 413           | 136                 |
| Prevalence                    | 374           | 136                 |
| Incidence                     | 11            | 6                   |
| Remission                     | 28            | 16                  |
| Relative risk                 | 5             | 3                   |
| Standardized mortality ratio  | 1             | 1                   |
| With-condition mortality rate | 4             | 2                   |
| Proportion                    | 15            | 1                   |

## Data processing

#### *Age-Sex and Sex Split*

In some cases, data are reported by only age or only sex, but not both. For example, a study may have included the prevalence of males and females with Asthma and then separately reported the prevalence of both sexes combined in smaller age bins (e.g. 40-45 years, 46-50, etc.) that have Asthma. In these cases, we perform an age-sex split by utilizing proportions within the study to disaggregate the data.

When data are not disaggregated into male and female categories, we instead perform a sex-split on the data by applying sex proportions from outside studies. The sex split analysis was carried out using MR-BRT and included a cubic spline on age to reflect the higher prevalence of asthma in males at young ages, which then transitions to a higher prevalence of asthma in females during the teenage years.

When data are aggregated into age categories larger than 25 years, we split the data into smaller age bins based on the global age pattern from an initial DisMod model that only included input data with age ranges under 25 years.

#### *Modeled excess mortality data*

As part of iteration of estimates for Asthma, we tested a new method of modeling excess mortality rate (EMR) that was not used in the final model.

In previous rounds, priors on EMR were estimated in DisMod by matching prevalence data points with their corresponding CSMR values within the same age, sex, year, location (by dividing CSMR by prevalence).

However, for many causes, DisMod estimated a rather unrealistic pattern of EMR compared to an expected pattern of decreasing EMR with greater access to quality health care. Such unexpected patterns often signal inconsistencies between CSMR estimates and the measures of prevalence and/or incidence.

In effort to provide greater guidance to DisMod on the expected pattern of EMR, EMR data generated in the previous GBD round were used as inputs into aMR-BRT model that included age, sex and healthcare access and quality index (HAQi) as covariates. Results from MR-BRT were then predicted for each location year, sex and for ages 0, 10, 20 ....100.

While this method led to some improvements in the consistency of EMR relative to health care access, the resulting prevalence estimates were unrealistic. We decided to continue using the DisMod EMR estimations while keeping HAQi as a country-level covariate to inform EMR with a mean and standard deviation produced from MR-BRT.

### *Bias Adjustments*

In GBD 2019, we improved the bias adjustment methods by utilizing a MR-BRT model outside of DisMod to allow a more direct comparison between different case definitions and/or study designs.

We made a series of adjustments to data that don't completely match our case definition, doctor's diagnosis and wheezing in the past year. The estimation of Asthma in a population varies slightly by the case definition used (wheezing and diagnosis, only wheezing, etc). Similarly, claims data is subject to biases. An analysis for GBD 2017 showed that claims data were systemically lower than asthma survey data, probably reflecting selection bias with regard to socioeconomic status. Adjustments are made to these data to correct these biases.

The adjustment is a logit-transformation method in MR-BRT. The general process is described below:

1. Identify data points with overlapping year, age, sex, and location between reference and alternative definitions.
2. Logit transform overlapping data points of alternative and reference case definitions
3. Convert overlapping data points into a difference in logit space using the following equation:  

$$\text{logit}(\text{alternative}) - \text{logit}(\text{reference})$$
4. Use the delta method to compute standard errors of overlapping data points in logit space, then calculate standard error of logit difference using the following equation:  

$$\sqrt{(\text{variance of alternative}) + (\text{variance of reference})}$$
5. Using MR-BRT, conduct a random effects meta-regression to obtain the pooled logit difference of alternative to reference
6. Apply the pooled logit difference to all data points of alternative case definitions using the following equation:  

$$\text{new}_{\text{estimate}} = \text{inverse.logit}((\text{logit}(\text{alternative})) - (\text{pooled logit difference}))$$
7. Calculate new standard errors using the delta method, accounting for gamma (between-study heterogeneity)

Data derived from claims from commercial health insurance in the United States were also adjusted using a factor estimated in MR-BRT. To account for this, we estimated a MarketScan 2000 coefficient and a separate MarketScan coefficient for the remaining years of MarketScan data, by comparing the national

values in these datasets to national asthma estimates from the USA National Health and Nutrition Examination Survey and National Health Interview Surveys.

The coefficients for bias adjustments are shown:

#### MR-BRT Crosswalk Adjustment Factors

| Data input                          | Status | Gamma | Beta Coefficient, Logit (95% CI) | Adjustment factor*   |
|-------------------------------------|--------|-------|----------------------------------|----------------------|
| Wheezing + Doctor's Diagnosis       | Ref    | 0.26  | ---                              | ---                  |
| Only Wheezing                       | Alt    |       | 1.09<br>(0.61, 1.59)             | 0.75<br>(.65, 0.83)  |
| Only Diagnosis                      | Alt    |       | 0.99<br>(0.50, 1.48)             | 0.73<br>(0.62, 0.82) |
| Self-reported currently have asthma | Alt    |       | .01<br>(-0.48, 0.56)             | 0.50<br>(0.38, 0.64) |
| Self-reported ever having asthma    | Alt    |       | 0.66<br>(0.11, 1.20)             | 0.66<br>(0.53, 0.77) |
| Marketscan 2000                     | Alt    | 0.00  | -1.35<br>(-1.37, -1.33)          | 0.21<br>(0.20, 0.21) |
| Marketscan 2010 - 2016              | Alt    | 0.60  | -1.60<br>(-2.71, -0.43)          | .17<br>(.06, .41)    |

*\*Adjustment factor is the inverse-logit transformed Beta coefficient; <0.5 represents that alternative is adjusted upward; >0.5 represents alternative is adjusted downward*

## Modelling strategy

We use DisMod-MR 2.1 as the main modelling tool for asthma. Prior settings include a maximum remission of 0.3 (reflecting the upper bound of the highest observed data) and no incidence between the ages of 0 and 0.5 year, as a diagnosis cannot be made in young infants.

#### Predictive covariates

To assist estimation, particularly in locations with few or no data, we included covariates in our DisMod model that are associated with measures of asthma epidemiology in prior studies and for which estimates of those covariates are available for all GBD year-age-sex-location combinations. Specifically, we use log LDI and the asthma standardised exposure variable (SEV), a scalar that combines exposure of all GBD risks that influence asthma.

We also used HAQ<sub>i</sub> covariate with priors from tests on excess mortality rate in MR-BRT.

| Covariate Table                     | Measure | Beta                      | Exponentiated       |
|-------------------------------------|---------|---------------------------|---------------------|
| Healthcare Access and Quality Index | EMR     | -0.06<br>(-.062 to -.059) | .94<br>(.93 to .94) |

|                          |                       |                        |                     |
|--------------------------|-----------------------|------------------------|---------------------|
| Log SEV scalar: asthma   | prevalence            | 0.75<br>(0.75–0.76)    | 2.13<br>(2.12–2.14) |
| Log LDI (I\$ per capita) | excess mortality rate | -0.5<br>(-0.5 to -0.5) | 0.61<br>(0.61–0.61) |

### *Severity split inputs*

Lay descriptions and disability weights for the asthma health states are shown in the table below. The distribution between the three health states is derived from an analysis of the USA Medical Expenditure Panel Surveys (MEPS). The methods are described in full in a separate section of this appendix. Briefly, MEPS is an ongoing survey of health service encounters with as its main objective to collect data on health expenditure. Panels are recruited every year and followed up for a period of two years. Diagnostic information provided by respondents on the reasons for any health care contact are coded into three-digit ICD-9 codes by professional coders.

Twice over the two-year follow-up period, respondents are asked to fill in 12-Item Short Form Surveys (SF-12). From convenience samples asking respondents to fill in SF-12 for 60 of the GBD health states, IHME has created a mapping from SF-12 scores to GBD disability weights (DW). We perform a regression with indicator variables for all GBD causes that we can identify from the ICD codes in MEPS to derive for each individual with a diagnosis the amount of disability that can be attributed to that condition after controlling for any comorbid conditions. Anyone with a diagnosis of asthma in whom the disability assigned to asthma is negative or zero we assume is asymptomatic (at the time of asking SF-12 question relating to their health status in the past four weeks). Non-zero values we bin into the three health states assuming a split between these at the midpoint between DW values. The table below gives the proportions in MEPS in each of the health states and an asymptomatic state.

| Severity level       | Lay description                                                                                                                                                         | DW (95% CI)            | Severity distribution |
|----------------------|-------------------------------------------------------------------------------------------------------------------------------------------------------------------------|------------------------|-----------------------|
| Asymptomatic         |                                                                                                                                                                         |                        | 36.2%<br>(35.0–37.3%) |
| Controlled           | This person has wheezing and cough once a month, which does not cause difficulty with daily activities.                                                                 | 0.015<br>(0.007–0.026) | 19.9%<br>(13.6–27.8%) |
| Partially controlled | This person has wheezing and cough once a week, which causes some difficulty with daily activities.                                                                     | 0.036<br>(0.022–0.055) | 20.6%<br>(15.1–25.8%) |
| Uncontrolled         | This person has wheezing, cough, and shortness of breath more than twice a week, which causes difficulty with daily activities and sometimes wakes the person at night. | 0.133<br>(0.086–0.192) | 23.3%<br>(18.7–30.3%) |

# Interstitial lung disease and pulmonary sarcoidosis (ILD)

## Flowchart

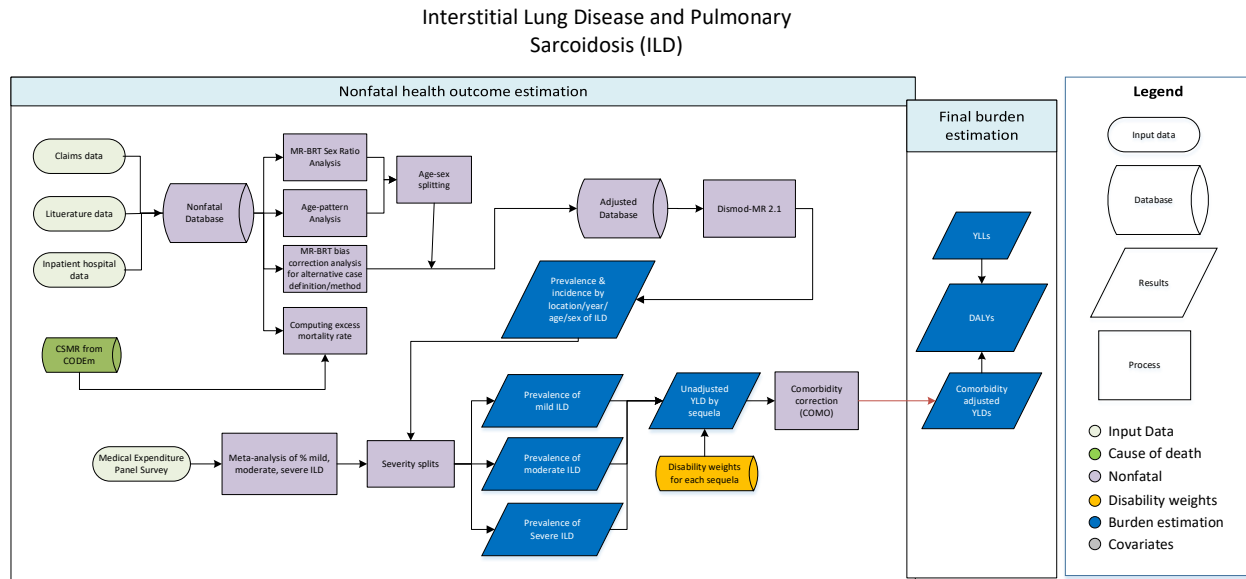

## Case definition

Interstitial lung diseases and pulmonary sarcoidosis are a collection of chronic respiratory diseases that impair lung function and oxygen uptake through scarring and/or inflammation. The relevant ICD codes are D86 and J84. For interstitial lung disease, we use the American Thoracic Society as the gold standard definition.

## Input data

### Model Inputs

No systematic review of the literature was conducted for ILD for this iteration of the Global Burden of Disease. These reviews are done on a rotating basis and updates will be made for a future iteration.

Data used to make estimates of ILD are from three sources. The first is literature data from previous systematic reviews – usually from smaller-scale studies of prevalence or incidence. The second data type is claims data for the United States. The source and preparation of these data is described elsewhere. The third data type is adjusted hospital inpatient records. Because these records only report primary diagnosis, a priori adjustments are made based on location and healthcare access and quality.

## Data inputs for interstitial lung disease and pulmonary sarcoidosis

| Measure                       | Total sources | Countries with data |
|-------------------------------|---------------|---------------------|
| All measures                  | 342           | 51                  |
| Prevalence                    | 306           | 45                  |
| Incidence                     | 27            | 16                  |
| With-condition mortality rate | 2             | 2                   |
| Proportion                    | 15            | 1                   |

## Data Processing

### Age-Sex and Sex Split

In some cases, data are reported by only age or only sex, but not both. For example, a study may have included the proportion of males and females with ILD and then separately reported the proportion of both sexes in smaller age bins (e.g. age 40-45, 45-50, etc.) that have ILD. In these cases, we perform an age-sex split by utilizing proportions within the study to disaggregate the data.

When no information by sex in a study is present, we instead perform a sex-split on the data by applying separate sex proportions. The sex split analysis was carried out using MR-BRT. When data are aggregated into age categories larger than 25 years, we split the data into smaller age bins based on the global age pattern from an initial DisMod model.

### Bias Adjustments

In GBD 2019, we improved the bias adjustment methods by utilizing a MR-BRT model outside of DisMod to allow a more direct comparison between different case definitions and/or study designs.

We made a series of adjustments to data that don't completely match our case definition. Data that only reports IPF or only sarcoidosis tend to vary estimates of ILD in a population. Similarly, claims tends to differ from the population, probably representing selection bias due to socioeconomic status. We make adjustments to these data to reflect these possible variations. The adjustment is a logit-transformation method in MR-BRT. The general process is described below:

1. Identify data points with overlapping year, age, sex, and location between reference and alternative definitions.
2. Logit transform overlapping data points of alternative and reference case definitions
3. Convert overlapping data points into a difference in logit space using the following equation:  

$$\text{logit}(\text{alternative}) - \text{logit}(\text{reference})$$
4. Use the delta method to compute standard errors of overlapping data points in logit space, then calculate standard error of logit difference using the following equation:  

$$\sqrt{(\text{variance of alternative}) + (\text{variance of reference})}$$
5. Using MR-BRT, conduct a random effects meta-regression to obtain the pooled logit difference of alternative to reference
6. Apply the pooled logit difference to all data points of alternative case definitions using the following equation:  

$$\text{new}_{\text{estimate}} = \text{inverse.logit}((\text{logit}(\text{alternative})) - (\text{pooled logit difference}))$$
7. Calculate new standard errors using the delta method, accounting for gamma (between-study heterogeneity)

### MR-BRT Crosswalk Adjustment Factors

| Data input          | Status | Gamma | Beta Coefficient, Logit<br>(95% CI) | Adjustment factor*    |
|---------------------|--------|-------|-------------------------------------|-----------------------|
| IPF and Sarcoidosis | Ref    | 0.23  | ---                                 | ---                   |
| Only IPF            | Alt    |       | -1.46<br>(-2.09 - -0.79)            | 0.19<br>(0.11 - 0.31) |
| Only Sarcoidosis    | Alt    |       | -1.07<br>(-1.71 - -0.40)            | 0.26<br>(0.15—0.40)   |
| Marketscan 2000     | Alt    | 0     | -0.31<br>(-0.32 - -0.29)            | 0.42<br>(0.42 - 0.43) |

*\*Adjustment factor is the inverse-logit transformed Beta coefficient; <0.5 represents that alternative is adjusted upward; >0.5 represents alternative is adjusted downward*

### Modelling strategy

Estimates for ILDR are produced using a standard DisMod-MR 2.1 approach. We use prior settings of zero remission and we constrain the super-region random effects to -0.5 to 0.5 to ensure model stability.

We employed predictive covariates to improve estimation in locations with scarce prevalence data. These were income per capita and the healthcare access and quality index (HAQI). The priors on HAQI were model outputs from the MRBRT modelling on EMR as described in the next section.

| Variable name                       | Measure               | Beta                         | Exponentiated         |
|-------------------------------------|-----------------------|------------------------------|-----------------------|
| LDI (I\$ per capita)                | excess mortality rate | -0.2<br>(-0.2 to -0.2)       | 0.82<br>(0.82—0.82)   |
| Healthcare Access and Quality index | excess mortality rate | -0.014<br>( -0.014 — -0.014) | 0.99<br>(0.99 — 0.99) |

### Predicted excess mortality rate with MR-BRT

Similar to other causes, we include estimates of cause-specific mortality rate (CSMR) and Excess Mortality Rate (EMR) as model inputs. In previous rounds, priors on excess mortality rate (EMR) were estimated in DisMod by matching prevalence data points with their corresponding CSMR values within the same age, sex, year, location (by dividing CSMR by prevalence). For short duration conditions (remission>1), the corresponding prevalence was derived by running an initial model and then applying the same CSMR/prevalence method.

However, for many causes, DisMod estimated a rather unrealistic pattern of EMR compared to an expected pattern of decreasing EMR with greater access to quality health care. Such unexpected patterns often signal inconsistencies between CSMR estimates and the measures of prevalence and/or incidence.

To provide greater guidance to DisMod on the expected pattern of EMR, EMR data generated in the previous round were modeled using the MR-BRT approach by age and sex with a prior on healthcare access and quality index (HAQI) having a negative coefficient. Results from MR-BRT were then predicted for each location year, sex and for ages 0, 10, 20 ....100. We included HAQI as a country-level covariate to inform EMR with a mean and standard deviation produced from MR-BRT.

## Severity Splits

Data to inform estimates of the severity gradient due to ILD are derived from previously analyses of the Medical Expenditure Panel Survey (MEPS). The table below illustrates the lay descriptions and disability weights associated with different levels of severity of interstitial lung disease.

| Severity level | Lay description                                                                                                                                                                           | DW (95% CI)            |
|----------------|-------------------------------------------------------------------------------------------------------------------------------------------------------------------------------------------|------------------------|
| Mild           | Has cough and shortness of breath after heavy physical activity, but is able to walk long distances and climb stairs.                                                                     | 0.019<br>(0.011–0.033) |
| Moderate       | Has cough, wheezing, and shortness of breath, even after light physical activity. The person feels tired and can walk only short distances or climb only a few stairs.                    | 0.225<br>(0.153–0.312) |
| Severe         | Has cough, wheezing, and shortness of breath all the time. The person has great difficulty walking even short distances or climbing any stairs, feels tired when at rest, and is anxious. | 0.408<br>(0.273–0.556) |

## Other chronic respiratory diseases

In addition to the chronic respiratory diseases described above, there are other types of chronic respiratory diseases with a range of severities and associated sequelae. Because these chronic respiratory diseases are diverse in their underlying causes and risk factors as well as in their associated health outcomes, modelling them together in a DisMod-MR model would not produce reliable estimates of prevalence. Instead, we calculated the YLDs caused by other chronic respiratory diseases directly using a YLD/YLL ratio as a 'place holder'.

We calculated the ratio of YLDs to YLLs across the specified chronic respiratory diseases for which non-fatal outcomes were modelled, using YLL estimates from the GBD 2019 cause of death (CoD) analysis. We then multiplied this YLD/YLL ratio by the YLL estimates for other chronic respiratory diseases.

# Risk-specific modeling descriptions

## Non-optimal temperature

### Flowchart

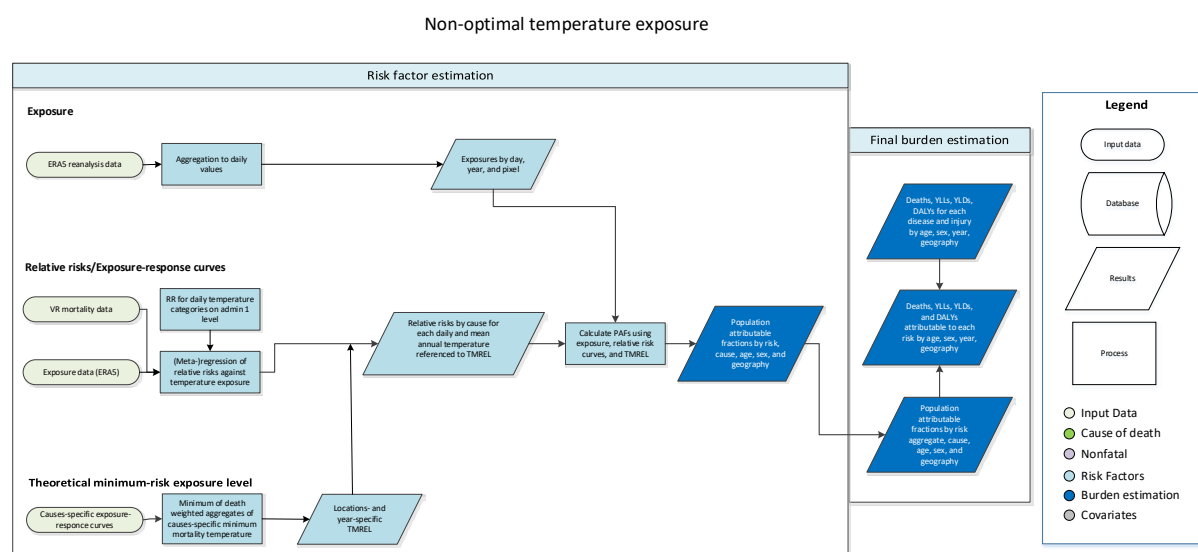

### Input data and modelling strategy

#### Case definition

The exposure of non-optimal temperature is defined as the same day exposure to ambient temperature that is either warmer or colder than the temperature associated with the minimum mortality risk. Specifically, we define the theoretical minimum risk exposure level (TMREL) for temperature as the temperature that is associated with the lowest overall mortality attributable to the risk, in a given location and year. Given varying exposure-response curves for different mean annual temperature zones, as well as spatially and temporally varying cause compositions, we estimate TMREs by year and location and are not using a globally uniform TMREL. High temperature (heat) exposure is defined as exposure to temperatures warmer than this TMREL and low temperature (cold) is defined as temperatures colder than this TMREL.

#### Exposure

##### ERA5 data

We derived exposure estimates from the ERA5 reanalysis dataset from the European Centre for Medium-Range Weather Forecasts (ECMWF). ECMWF produced ERA5 estimates using their Integrated Forecast System (IFS). Hourly values of surface temperature are available for a spatial resolution of 0.25°x0.25°. Uncertainty estimates for these temperature values, ie, the ensemble spread (standard deviation) is available for every 3 hours (00:00, 03:00, 06:00, 09:00, 12:00, 15:00, 18:00, 21:00) for a spatial resolution of 0.5°x0.5°. At the time of analysis, data were available from 1979 to June 2019.<sup>1,2</sup> We calculated daily averages of temperature and spread for each pixel and then assigned an uncertainty value to each daily temperature value. Based on the spread we derived 1,000 draws of each daily temperature pixel.

### **Population data**

Population data for calculating population-weighted location means were derived from WorldPop, which is an open source project initiated in 2013<sup>3</sup>. Multi-temporal, globally consistent, high-resolution human population data at 1 km x 1 km resolution can be downloaded from <http://www.worldpop.org.uk/> for 2000, 2005, 2010, 2015, and 2020. For the purpose of our work, we interpolated in-between the 5-year estimation bins to obtain annual data. Further, we extrapolated until 1990 by using the 2000-2005 growth rate for back-casting.

**Table 1: Data inputs for exposure for non-optimal temperature.**

| Input data                                    | Exposure |
|-----------------------------------------------|----------|
| Source count (total)                          | 203      |
| Number of countries and territories with data | 204      |

### Exposure-response modelling

#### **Mortality data**

Deaths at the individual-level that included information regarding the cause (ie, ICD code), date, and the location at the second administrative level (admin2) or finer were collected from the GBD cause-of-death (CoD) database for vital registration data sources. We adapted the GBD standard procedure for garbage code redistribution to redistribute daily mortality data rather than annual data and mapped ICD causes to GBD causes for level 3. In total, we analysed 58.9 million deaths from eight different countries and 15,197 administrative units. For Brazil, the data covers a period from 1999 to 2016 for 5,570 municipalities and 19.9 million deaths. For Chile, the data covers the period from 1990 to 1996 and 2009 to 2011 for 15 regions and 2.46 million deaths. For Colombia, the data covers a period from 2001 to 2005 for 1,125 municipalities and 0.95 million deaths. For Guatemala, the data covers a period from 2009 to 2016 for 333 municipalities and 0.49 million deaths. For Mexico, the data covers a period from 1996 to 2015 for 2,438 municipalities and 9.88 million deaths. For New Zealand, the data covers a period from 1988 to 2014 for 20 district health boards and 0.76 million deaths. For the United States, the data covers a period from 1980 to 1988 for 3,124 municipalities and 18.3 million deaths. For China, the data covers the year 2016 for 2,556 counties and 6.1 million deaths.

#### **Exposure-response modelling (MR-BRT)**

To estimate cause-specific mortality, based on average daily temperature and temperature zone (defined by mean annual temperature), we used a robust meta-regression framework, implemented through the MR-BRT (Bayesian, regularised, trimmed) tool. The tool allows three features that are essential to the analysis:<sup>5</sup>

- A meta-analytic framework that can handle heterogeneous data sources
- A robust approach to outlier detection and removal (trimming)
- Specification of the functional dependence of outcome vs. average daily temperature and temperature zone as a 2-dimensional surface through a spline interface.

The use of trimming in a vast array of inference and machine learning problems is standard.<sup>6,7,8</sup> The use of high-dimensional splines has been proposed before,<sup>9</sup> but the methods used for estimation go beyond prior work, and we explain them below.

The functional relationship between any outcome  $y$  and input variables  $(t_1, t_2)$  models  $y$  as a linear combination of 2d spline basis elements. Each spline basis element is a product of individual basis elements for 1D splines for  $t_1$  and  $t_2$ . Therefore, the inference problem looks for a combination of simple curvilinear 2D elements that fit the data while preserving smoothness across element boundaries. The MR-BRT tool also allows prior information to influence the shape of the spline, particularly in areas with sparse data.

For the purpose of modelling the relationship between mortality and mean annual and daily temperature we imposed monotonicity in the direction of daily temperature. For all J-shaped curves that depicted an increase in mortality above and below a threshold, we forced the curve to monotonically decrease at the lower end of the temperature distribution and to monotonically increase at the upper end. For all external causes that displayed a monotonic increase over the entire temperature range, we imposed monotonicity only in the direction of warmer temperatures. We placed 2 knots of degree 3 in the direction of mean annual temperature when fitting the surface. In the direction of daily mean temperature, we placed 3 knots of degree 3 for J-shaped causes and 2 knots of degree 1 for external causes that monotonically increase over temperature range. Figure 1 shows an example of a relative risk (RR) surface along daily and annual mean temperature for drowning.

We estimated uncertainty using a two-step approach. First, we derived the uncertainty of the mean surface from the measurement error using the fit-retrofit error. Second, we added uncertainty from the random effects by sampling it separately from the cold and warm side.

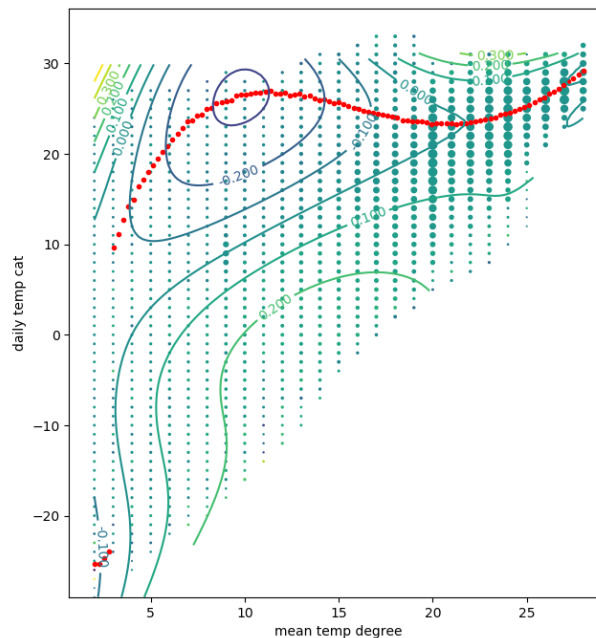

Figure 1: Log relative risk of death from lower respiratory infection along mean annual temperature (mean temp cat) and daily mean temperature (daily temp cat). The red dotted line depicts minimum mortality temperature along mean annual temperature zones. Green and blue lines depict isopleths, ie, lines of equal log RR of mortality

**Table 2: Data inputs for relative risks for non-optimal temperature**

| Input data                    | Relative risk |
|-------------------------------|---------------|
| Source count (total)          | 112           |
| Number of countries with data | 8             |

**Cause selection**

We excluded all causes with fewer than 100,000 deaths as well as causes of death that did not represent a particular entity but rather a summary category (eg, other cardiovascular diseases). Further, dementia and protein energy malnutrition were not considered in this analysis due to inconsistencies in data classification. The remaining causes were selected based on significance. For this, for each cause and each mean temperature zone we determined the widest range of consecutive daily temperatures with statistically significant relative risks, expressed as a percentage of the full range of daily temperatures in that mean temperature zone. Figure 2 gives an example of the temperature-mortality relationship for three selected slices (mean annual temperature of 6 °C, 17 °C and 21 °C). Significant areas along the exposure-response curves are marked in grey. We included all causes where at least 30% of zones had a consecutive significance range that spanned at least 5% of the full range of daily temperatures. Twelve causes met these criteria and were included as outcomes associated with non-optimal temperature: ischaemic heart disease, stroke, hypertensive heart disease, diabetes, chronic kidney disease, lower respiratory infection, chronic obstructive pulmonary disease, homicide, suicide, mechanical injuries, transport-related injuries, and drowning.

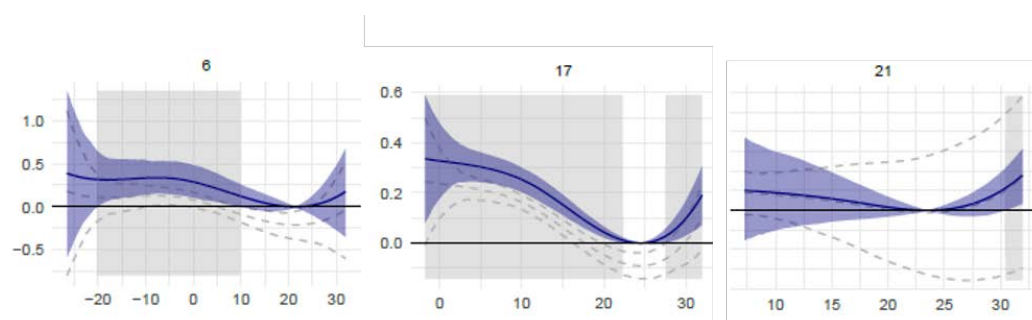

Figure 2: Selected exposure-response curves for the relationship between daily mean temperature and log RR of lower respiratory infection mortality for mean annual temperature categories of 6 °C, 17 °C and 21 °C. Temperatures where associations are significant are displayed in grey.

**Theoretical minimum risk exposure level (TMREL)**

For the purpose of this analysis, the TMREL was defined as the temperature associated with the lowest mortality for all included causes. We calculated a death-weighted average of the cause-specific exposure-response curves with the minimum of this average curve being the TMREL. This was done for each year and each of the 990 GBD locations using CoD estimates produced for the GBD 2019 study. As climate zones or mean annual temperature can vary within a location, we calculated the TMREL for every mean annual temperature, assuming a consistent cause composition within a location. This approach represents the first use of spatially and temporally varying TMRELs within the GBD study.

### Population attributable fractions

The population attributable fraction (PAF) was calculated for each temperature pixel and each day of the year (ie, pixel-day). Subsequently, we population-weighted each pixel using the fraction of the population living in a given pixel relative to the GBD location. Depending on whether the daily mean temperature was below or above the TMREL, the effect was assigned to either low or high temperature. Daily population-weighted high and low temperature PAFs were then aggregated for the location and the year. Temperature effects can be either harmful or protective depending on whether the RR is above or below 1. For harmful temperature effects, ie, effects with a RR above 1, we used the following equation to derive PAFs:  $PAF = (RR - 1) / RR$ ; For temperature effects exhibiting a protective effect the equation was adapted by implementing the reverse RR:  $PAF = -((1/RR) - 1) / (1/RR)$ . The PAF associated with non-optimal temperature exposure is an aggregate of heat and cold effects in each location and year. We estimated the temperature attributable burden as the product of the total burden for that cause and the corresponding PAF for each GBD location, year, age group, and sex.

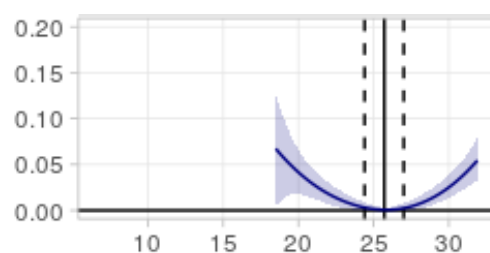

Figure 3: Schematic illustration of the exposure-response relationship between temperature and mortality and associated low temperature (cold) and high temperature effects beyond the theoretical minimum exposure level (TMREL). The blue line depicts the exposure-response curve with blue shaded line showing 95% uncertainty range. The black solid line depicts the TMREL with dashed black lines displaying 95% uncertainty range. Effects left of the TMREL are counted towards cold PAFs and right of the TMREL towards heat PAFs.

### References

- 1 Hersbach H, Bell B, Berrisford P, et al. Global reanalysis : goodbye Global reanalysis : goodbye ERA-Interim , hello. 2019. DOI:10.21957/vf291hehd7.
- 2 Copernicus Climate Change Service (C3S) (2017): ERA5: Fifth generation of ECMWF atmospheric reanalyses of the global climate. Copernicus Climate Change Service Climate Data Store (CDS), September 2019. .
- 3 Geography and Environmental Science, University of Southampton. Age and Sex Structures, Global Per Country 2000-2020 - WorldPop. Southampton , United Kingdom: Geography and Environmental Science, University of Southampton, 2018. .
- 4 Roth GA, Abate D, Hassen Abate K, et al. Global, regional, and national age-sex-specific mortality for 282 causes of death in 195 countries and territories, 1980-2017: a systematic analysis for the Global Burden of Disease Study 2017 GBD 2017 Causes of Death Collaborators\*. 2018 DOI:10.1016/S0140-6736(18)32203-7.

- 5 Zheng P, Aravkin AY, Barber R, Sorensen RJD, Murray CJL. Trimmed Constrained Mixed Effects Models: Formulations and Algorithms. 2019; published online Sept 23. <http://arxiv.org/abs/1909.10700> (accessed Nov 13, 2019).
- 6 Rousseeuw PJ. Least Median of Squares Regression. *J Am Stat Assoc* 1984; 79: 871–80.
- 7 Aravkin A, Davis D. Trimmed Statistical Estimation via Variance Reduction. *Math Oper Res* 2019; : moor.2019.0992.
- 8 Yang E, Lozano AC, Aravkin A. A general family of trimmed estimators for robust high-dimensional data analysis. *Electron J Stat* 2018; 12: 3519–53.
- 9 Pya N, Wood SN. Shape constrained additive models. *Stat Comput* 2015; 25: 543–59.

# High body-mass index

## Flowchart

Adult (Ages 20+) High Body-Mass Index: Data and Model Flow Chart

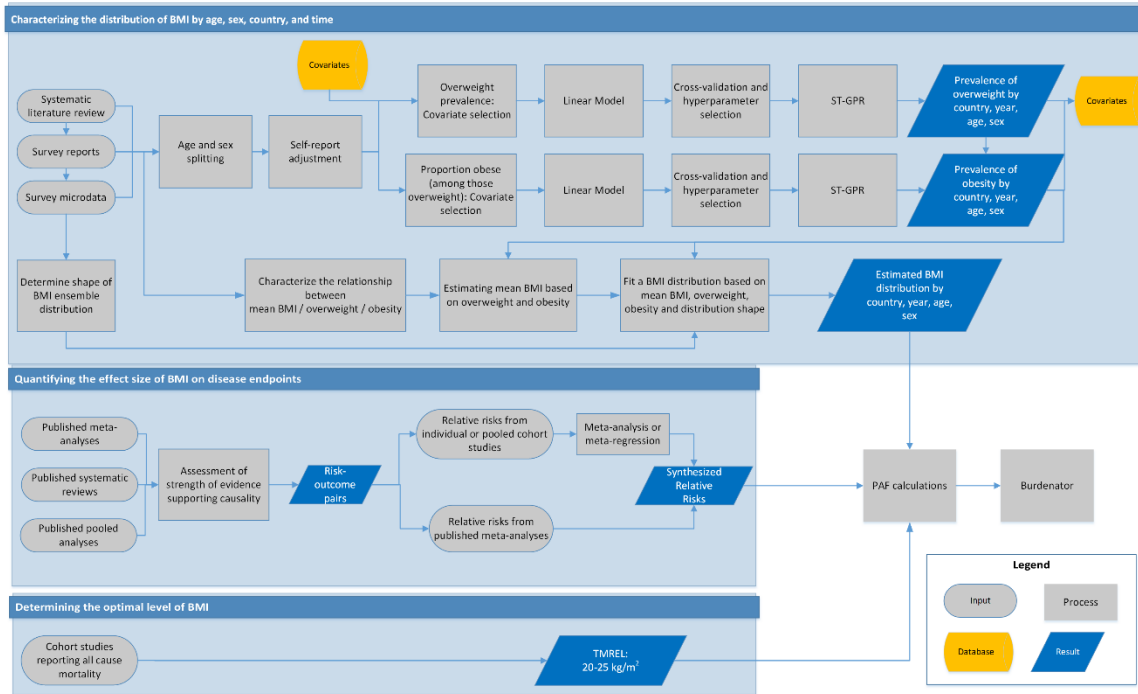

Childhood (Ages 2-19) High Body-Mass Index: Data and Model Flow Chart

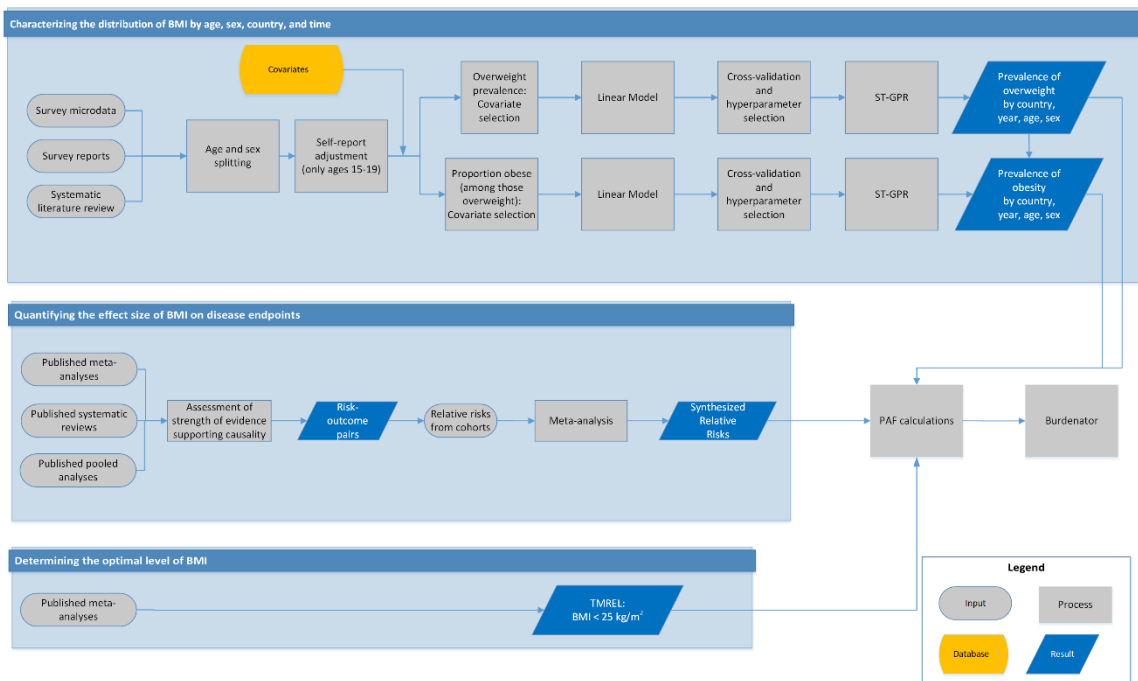

## Input data and methodological summary

### Case definitions

High body-mass index (BMI) for adults (ages 20+) is defined as BMI greater than 20 to 25 kg/m<sup>2</sup>. High BMI for children (ages 1–19) is defined as being overweight or obese based on International Obesity Task Force standards.

### Data sources

In GBD 2019, new data were added from sources included in the annual GHDx update of known survey series. We conducted a systematic review in GBD 2017 to identify studies providing nationally or subnationally representative estimates of overweight prevalence, obesity prevalence, or mean body-mass index (BMI). We limited the search to literature published between January 1, 2016, and December 31, 2016, to update the systematic literature search previously performed as part of GBD 2015.

The search for adults was conducted on 4 January 2017, using the following terms:

((("Body Mass Index"[Mesh] OR "Overweight"[Mesh] OR "Obesity"[Mesh]) AND ("Geographic Locations"[Mesh] NOT "United States"[Mesh]) AND ("humans"[Mesh] AND "adult"[MeSH]) AND ("Data Collection"[Mesh] OR "Health Services Research"[Mesh] OR "Population Surveillance"[Mesh] OR "Vital statistics"[Mesh] OR "Population"[Mesh] OR "Epidemiology"[Mesh] OR "surve\*" [TiAb]) NOT (Comment[ptyp] OR Case Reports[ptyp] OR "hospital"[TiAb])) AND ("2016/01/01"[Date - Publication] : "2016/12/31"[Date - Publication]))

The search for children was conducted on 4 August 2016, using the following terms:

((("Body Mass Index"[Mesh] OR "Overweight"[Mesh] OR "Obesity"[Mesh]) AND ("Geographic Locations"[Mesh] NOT "United States"[Mesh]) AND ("humans"[Mesh] AND "child"[MeSH]) AND ("Data Collection"[Mesh] OR "Health Services Research"[Mesh] OR "Population Surveillance"[Mesh] OR "Vital statistics"[Mesh] OR "Population"[Mesh] OR "Epidemiology"[Mesh] OR "surve\*" [TiAb]) NOT (Comment[ptyp] OR Case Reports[ptyp] OR "hospital"[TiAb])) AND ("2016/01/01"[Date - Publication] : "2016/12/31"[Date - Publication]))

**Table 1: Data inputs for exposure for high body-mass index.**

| Input data                    | Exposure |
|-------------------------------|----------|
| Source count (total)          | 2022     |
| Number of countries with data | 190      |

**Table 2: Data inputs for relative risks for high body-mass index.**

| Input data                    | Relative risk |
|-------------------------------|---------------|
| Source count (total)          | 267           |
| Number of countries with data | 32            |

## Eligibility criteria

We included representative studies providing data on mean BMI or prevalence of overweight or obesity among adults or children. For adults, studies were included if they defined overweight as  $\text{BMI} \geq 25 \text{ kg/m}^2$  and obesity as  $\text{BMI} \geq 30 \text{ kg/m}^2$ , or if estimates using those cutoffs could be back-calculated from reported categories. For children (children ages 2–19), studies were included if they used International Obesity Task Force (IOTF) standards to define overweight and obesity thresholds. We only included studies reporting data collected after January 1, 1980. Studies were excluded if they used non-random samples (eg, case-control studies or convenience samples), conducted among specific subpopulations (eg, pregnant women, racial or ethnic minorities, immigrants, or individuals with specific diseases), used alternative methods to assess adiposity (eg, waist-circumference, skin-fold thickness, or hydrodensitometry), had sample sizes of less than 20 per age-sex group, or provided inadequate information on any of the inclusion criteria. We also excluded review articles and non-English-language articles.

## Data collection process

Where individual-level survey data were available, we computed mean BMI using weight and height. We then used BMI to determine the prevalence of overweight and obesity. For individuals aged over 19 years, we considered them to be overweight if their BMI was greater than or equal to  $25 \text{ kg/m}^2$ , and obese if their BMI was greater than or equal to  $30 \text{ kg/m}^2$ . For individuals aged 2 to 19 years, we used monthly IOTF cutoffs<sup>2</sup> to determine overweight and obese status when age in months was available. When only age in years was available, we used the cutoff for the midpoint of that year. Obese individuals were also considered to be overweight. We excluded studies using the World Health Organization (WHO) standards or country-specific cutoffs to define childhood overweight and obesity. At the individual level, we considered  $\text{BMI} < 10 \text{ kg/m}^2$  and  $\text{BMI} > 70 \text{ kg/m}^2$  to be biologically implausible and excluded those observations.

The rationale for choosing to use the IOTF cutoffs over the WHO standards has been described elsewhere.<sup>1</sup> Briefly, the IOTF cutoffs provide consistent child-specific standards for ages 2–18 derived from surveys covering multiple countries. By contrast, the WHO growth standards apply to children under age 5, and the WHO growth reference applies to children ages 5–19. The WHO growth reference for children ages 5–19 was derived from United States data, which are less representative than the multinational data used by IOTF. Additionally, the switch between references at age 5 can produce artificial discontinuities. Given that we estimate global childhood overweight and obesity for ages 2–19 (with ages 19 using standard adult cutoffs), the IOTF cutoffs were preferable. Additionally, we found that IOTF cutoffs were more commonly used in scientific literature covering childhood obesity.

From report and literature data, we extracted data on mean BMI, prevalence of overweight, and prevalence of obesity, measures of uncertainty for each, and sample size, by the most granular age and sex groups available. Additionally, we extracted the same study-level covariates as were extracted from microdata (measurement, urbanicity, and representativeness), as well as location and year.

In addition to the primary indicators described above, we extracted relevant survey-design variables, including primary sampling unit, strata, and survey weights, which were used to tabulate individual-level microdata and produce accurate measures of uncertainty. We extracted three study-level covariates: 1) whether height and weight data were measured or self-reported; 2) whether the study was predominantly conducted in an urban area, rural area, or both; and 3) the level of representativeness of the study (national or subnational).

Finally, we extracted relevant demographic indicators, including location, year, age, and sex. We estimated the standard error of the mean from individual-level data, where available, and used the reported standard error of the mean for published data. When multiple data sources were available for the same country, we included all of them in our analysis. If data from the same data source were available in multiple formats such as individual-level data and tabulated data, we used individual-level data.

## Modelling strategy

### Age and sex splitting

Any report or literature data provided in age groups wider than the standard five-year age groups or as both sexes combined were split using the approach used by Ng and colleagues.<sup>2</sup> Briefly, age-sex patterns were identified using sources with data on multiple age-sex groups and these patterns were applied to split aggregated report and literature data. Uncertainty in the age-sex split was propagated by multiplying the standard error of the data by the square root of the number of splits performed. We did not propagate the uncertainty in the age pattern and sex pattern used to split the data as they seemed to have small effect.

### Self-report bias adjustment

We included both measured and self-reported data. We tested for bias in self-report data compared to measured data, which is considered to be the gold-standard. There was no clear direction of bias for children ages 2–14, so for these age groups we only included measured data. For individuals ages 15 and above, we adjusted self-reported data for overweight prevalence and obesity prevalence. In GBD 2017, the self-report bias adjustment used a nested hierarchical mixed-effects regression model. This approach was updated in GBD 2019 to utilise the power of MR-BRT. For both overweight and obesity, we fit sex-specific MR-BRT models on the logit difference between measured and self-reported with a fixed effect on super-region. The bias coefficients derived from these two models are in Table 1 and 2.

**Table 1: MR-BRT self-report crosswalk adjustment factors for overweight prevalence**

| Model   | Data input                                                            | Reference or alternative case definition | Gamma | Beta coefficient, logit (95% CI) |
|---------|-----------------------------------------------------------------------|------------------------------------------|-------|----------------------------------|
| Females | Measured data                                                         | Ref                                      | 0.26  | ---                              |
|         | Self-reported data (southeast Asia, east Asia, and Oceania)           | Alt                                      |       | -0.53 (-1.03, -0.04)             |
|         | Self-reported data (central Europe, eastern Europe, and central Asia) | Alt                                      |       | -0.20 (-0.69, 0.30)              |
|         | Self-reported data (high-income)                                      | Alt                                      |       | -0.25 (-0.75, 0.24)              |
|         | Self-reported data (Latin America and Caribbean)                      | Alt                                      |       | -0.19 (-0.69, 0.31)              |
|         | Self-report data (north Africa and Middle East)                       | Alt                                      |       | -0.38 (-0.89, 0.11)              |
|         | Self-report data (south Asia)                                         | Alt                                      |       | 0.36 (-0.14, 0.85)               |
|         | Self-report data (sub-Saharan Africa)                                 | Alt                                      |       | -0.26 (-0.76, 0.24)              |
| Males   | Measured data                                                         | Ref                                      | 0.43  | ---                              |

|  |                                                                       |     |  |                     |
|--|-----------------------------------------------------------------------|-----|--|---------------------|
|  | Self-reported data (southeast Asia, east Asia, and Oceania)           | Alt |  | -0.36 (-1.17, 0.50) |
|  | Self-reported data (central Europe, eastern Europe, and central Asia) | Alt |  | -0.03 (-0.84, 0.82) |
|  | Self-reported data (high-income)                                      | Alt |  | 0.05 (-0.77, 0.87)  |
|  | Self-reported data (Latin America and Caribbean)                      | Alt |  | -0.02 (-0.84, 0.81) |
|  | Self-report data (north Africa and Middle East)                       | Alt |  | -0.21 (-1.04, 0.61) |
|  | Self-report data (south Asia)                                         | Alt |  | 0.53 (-0.28, 1.37)  |
|  | Self-report data (sub-Saharan Africa)                                 | Alt |  | -0.27 (-1.09, 0.55) |

**Table 2: MR-BRT self-report crosswalk adjustment factors for obesity prevalence**

| Model   | Data input                                                            | Reference or alternative case definition | Gamma | Beta coefficient, logit (95% CI) |
|---------|-----------------------------------------------------------------------|------------------------------------------|-------|----------------------------------|
| Females | Measured data                                                         | Ref                                      | 0.38  | ---                              |
|         | Self-reported data (southeast Asia, east Asia, and Oceania)           | Alt                                      |       | -0.11 (-0.86, 0.64)              |
|         | Self-reported data (central Europe, eastern Europe, and central Asia) | Alt                                      |       | -0.95 (-1.70, -0.19)             |
|         | Self-reported data (high-income)                                      | Alt                                      |       | -0.42 (-1.16, 0.34)              |
|         | Self-reported data (Latin America and Caribbean)                      | Alt                                      |       | -0.41 (-1.16, 0.34)              |
|         | Self-report data (north Africa and Middle East)                       | Alt                                      |       | -0.48 (-1.23, 0.27)              |
|         | Self-report data (south Asia)                                         | Alt                                      |       | 0.50 (-0.25, 1.26)               |
|         | Self-report data (sub-Saharan Africa)                                 | Alt                                      |       | -0.41 (-1.16, 0.34)              |
| Males   | Measured data                                                         | Ref                                      | 0.74  |                                  |
|         | Self-reported data (southeast Asia, east Asia, and Oceania)           | Alt                                      |       | 0.04 (-1.41, 1.53)               |
|         | Self-reported data (central Europe, eastern Europe, and central Asia) | Alt                                      |       | -0.79 (-2.25, 0.71)              |
|         | Self-reported data (high-income)                                      | Alt                                      |       | -0.13 (-1.58, 1.40)              |
|         | Self-reported data (Latin America and Caribbean)                      | Alt                                      |       | -0.26 (-1.70, 1.21)              |
|         | Self-report data (north Africa and Middle East)                       | Alt                                      |       | -0.33 (-1.77, 1.16)              |
|         | Self-report data (south Asia)                                         | Alt                                      |       | 0.66 (-0.78, 2.15)               |
|         | Self-report data (sub-Saharan Africa)                                 | Alt                                      |       | -0.41 (-1.86, 1.08)              |

### Prevalence estimation for overweight and obesity

After adjusting for self-report bias and splitting aggregated data into five-year age-sex groups, we used spatiotemporal Gaussian process regression (ST-GPR) to estimate the prevalence of overweight and obesity. This modelling approach has been described in detail elsewhere.

The linear model, which when added to the smoothed residuals forms the mean prior for GPR is as follows:

$$\begin{aligned}\text{logit}(\text{overweight})_{c,a,t} &= \beta_0 + \beta_1 \text{energy}_{c,t} + \beta_2 \text{SDI}_{c,t} + \beta_3 \text{vehicles}_{c,t} + \beta_4 \text{agriculture}_{c,t} + \sum_{k=5}^{21} \beta_k I_{A[a]} + \alpha_s + \alpha_r + \alpha_c \\ \text{logit}(\text{obesity/overweight})_{c,a,t} &= \beta_0 + \beta_1 \text{energy}_{c,t} + \beta_2 \text{SDI}_{c,t} + \beta_3 \text{vehicles}_{c,t} + \sum_{k=4}^{21} \beta_k I_{A[a]} + \alpha_s + \alpha_r + \alpha_c\end{aligned}$$

where energy is ten-year lag-distributed energy consumption per capita, SDI is a composite index of development including lag-distributed income per capita, education, and fertility, vehicles is the number of two- or four-wheel vehicles per capita, and agriculture is the proportion of the population working in agriculture.  $I_{A[a]}$  is a dummy variable indicating specific age group A that the prevalence point captures, and  $\alpha_s$ ,  $\alpha_r$ , and  $\alpha_c$  are super-region, region, and country random intercepts, respectively. Random effects were used in model fitting but were not used in prediction.

We tested all combinations of the following covariates to see which performed best in terms of in-sample AIC for the overweight linear model and the obesity as a proportion of overweight linear model: ten-year lag-distributed energy per capita, proportion of the population living in urban areas, SDI, lag-distributed income per capita, educational attainment (years) per capita, proportion of the population working in agriculture, grams of sugar adjusted for energy per capita, grams of sugar not adjusted for energy per capita, and the number of two- or four-wheeled vehicles per capita. We selected these candidate covariates based on theory as well as reviewing covariates used in other publications. The final linear model was selected based on 1) if the direction of covariates matched what is expected from theory, 2) all the included covariates were significant, and 3) minimising in-sample AIC. The covariate selection process was performed using the dredge package in R.

### Estimating mean BMI

To estimate the mean BMI for adults in each country, age, sex, and time period 1980–2019, we first used the following nested hierarchical mixed-effects model, fit using restricted maximum likelihood on data from sources containing estimates of all three indicators (prevalence of overweight, prevalence of obesity, and mean BMI), in order to characterise the relationship between overweight, obesity, and mean BMI:

$$\begin{aligned}\log(\text{BMI}_{c,a,s,t}) &= \beta_0 + \beta_1 \text{ow}_{c,a,s,t} + \beta_2 \text{ob}_{c,a,s,t} + \beta_3 \text{sex} + \sum_{k=4}^{20} \beta_k I_{A[a]} + \alpha_s(1 + \text{ow}_{c,a,s,t} + \text{ob}_{c,a,s,t}) + \alpha_r(1 \\ &\quad + \text{ow}_{c,a,s,t} + \text{ob}_{c,a,s,t}) + \alpha_c(1 + \text{ow}_{c,a,s,t} + \text{ob}_{c,a,s,t}) + \epsilon_{c,a,s,t}\end{aligned}$$

where  $\text{ow}_{c,a,s,t}$  is the prevalence of overweight in country c, age a, sex s, and year t,  $\text{ob}_{c,a,s,t}$  is the prevalence of obesity in country c, age a, sex s, and year t, sex is a fixed effect on sex,  $I_{A[a]}$  is an indicator variable for age, and  $\alpha_s$ ,  $\alpha_r$ , and  $\alpha_c$  are random effects at the super-region, region, and country, respectively. The model was run in Stata 13.

We applied 1000 draws of the regression coefficients to the 1000 draws of overweight prevalence and obesity prevalence produced through ST-GPR to estimate 1000 draws of mean BMI for each country, year, age, and sex. This approach ensured that overweight prevalence, obesity prevalence, and mean BMI were correlated at the draw level and uncertainty was propagated.

### Estimating BMI distribution

We used the ensemble distribution approach described in the manuscript. We fit ensemble weights by source and sex, with source- and sex-specific weights averaged across all sources included to produce the final global weights. The ensemble weights were fit on measured microdata. The final ensemble weights were exponential = 0.002, gamma = 0.028, inverse gamma = 0.085, log-logistic = 0.187, Gumbel = 0.220, Weibull = 0.011, log-normal = 0.058, normal = 0.012, beta = 0.136, mirror gamma = 0.008, and mirror Gumbel = 0.113.

One thousand draws of BMI distributions for each location, year, age group, and sex estimated were produced by fitting an ensemble distribution using 1000 draws of estimated mean BMI, 1000 draws of estimated standard deviation, and the ensemble weights. Estimated standard deviation was produced by optimising a standard deviation to fit estimated overweight prevalence draws and estimated obesity prevalence draws.

### Assessment of risk-outcome pairs

Risk-outcome pairs were defined based on strength of available evidence supporting a causal effect. We performed a systematic review of published meta-analyses, pooled analyses, and systematic reviews available through PubMed using the following search string: ("Body Mass Index"[Mesh] OR "Overweight"[Mesh] OR "Obesity"[Mesh]) AND (Meta-Analysis[ptyp] OR "systematic review"[tiab] OR "pooled analysis"[tiab]). Inclusion criteria are 1) the health outcome is included in GBD, 2) at least one prospective cohort is included, and 3) that the summary effect size is statistically significant. For outcomes meeting inclusion criteria we completed causal criteria tables to evaluate the strength of evidence supporting a causal relationship. Gallbladder disease, cataract, multiple myeloma, gout, non-Hodgkin lymphoma, asthma, Alzheimer's disease, and atrial fibrillation were added as new outcomes in GBD 2016, resulting in a total of 38 outcomes.

### Theoretical minimum risk exposure level

For adults (ages 20+), the theoretical minimum risk exposure level (TMREL) of BMI (20–25 kg/m<sup>2</sup>) was determined based on the BMI level that was associated with the lowest risk of all-cause mortality in prospective cohort studies.<sup>3</sup>

For children (ages 2–19), the TMREL is “normal weight,” that is, not overweight or obese, based on IOTF cutoffs.

### Relative risk

The relative risk per five-unit change in BMI for each disease endpoint was obtained from meta-analyses, and where available, pooled analyses of prospective observational studies. In cases where a relative risk per five-unit change in BMI was not available we computed our own dose-response meta-analysis using two-step generalised least squares for time trends estimation methods.

For childhood outcomes (ages 2–19), we computed categorical relative risks for overweight and obesity using a random effects meta-analysis.

## References

- 1.) Cole, TJ, and T Lobstein. "Extended International (IOTF) Body Mass Index Cut-Offs for Thinness, Overweight and Obesity." *Pediatric Obesity* 2012; 7(4): 284–94.
- 2.) Ng M, Fleming T, Robinson M, et al. Global, regional, and national prevalence of overweight and obesity in children and adults during 1980–2013: a systematic analysis for the Global Burden of Disease Study 2013. *The Lancet* 2014; 384: 766–81.
- 3.) Angelantonio ED, Bhupathiraju SN, Wormser D, et al. Body-mass index and all-cause mortality: individual-participant-data meta-analysis of 239 prospective studies in four continents. *The Lancet* 2016; 388: 776–86.

# Smoking

## Flowchart

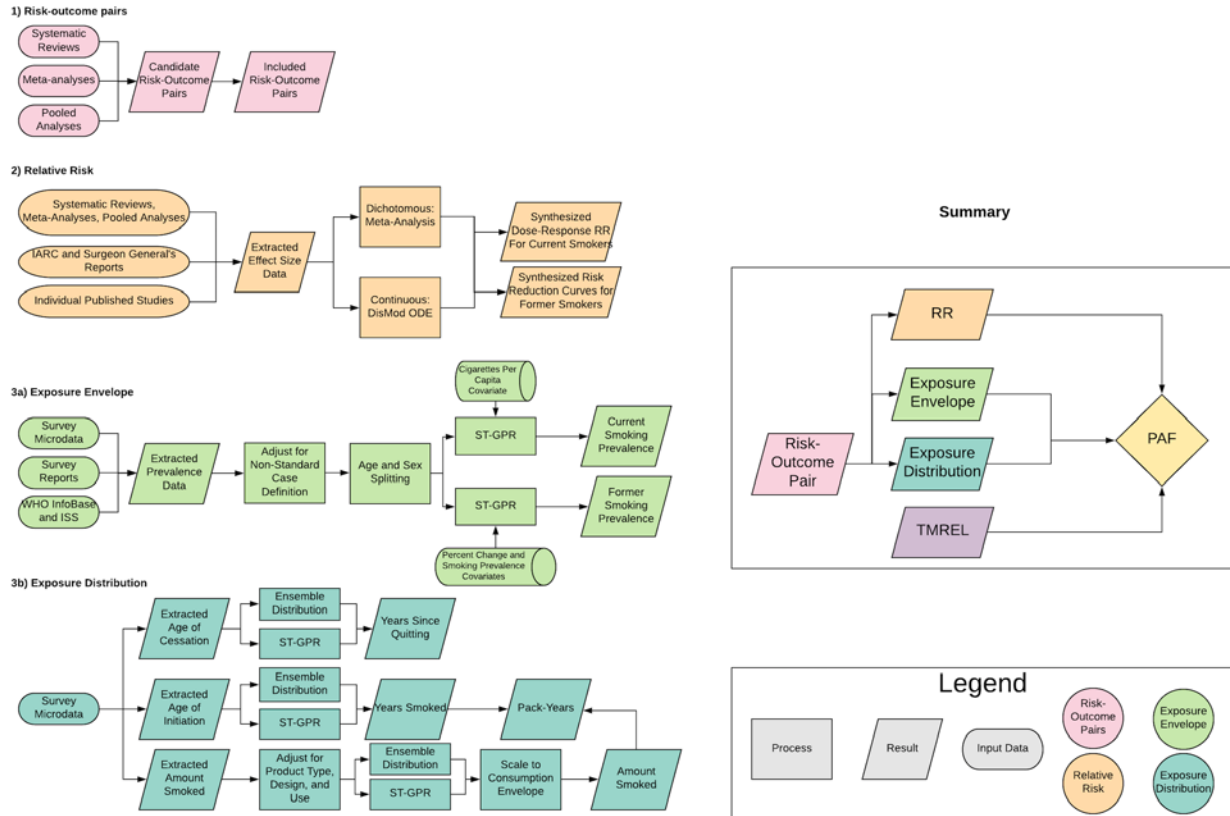

## Input data and methodological summary

### Definition

#### Exposure

As in GBD 2017, we estimated the prevalence of current smoking and the prevalence of former smoking using data from cross-sectional nationally representative household surveys. We defined current smokers as individuals who currently use any smoked tobacco product on a daily or occasional basis. We defined former smokers as individuals who quit using all smoked tobacco products for at least six months, where possible, or according to the definition used by the survey.

#### Input data

Our extraction method has not changed from GBD 2017. We extracted primary data from individual-level microdata and survey report tabulations. We extracted data on current, former, and/or ever smoked tobacco use reported as any combination of frequency of use (daily, occasional, and unspecified, which includes both daily and occasional smokers) and type of smoked tobacco used (all smoked tobacco, cigarettes, hookah, and other smoked tobacco products such as cigars or pipes),

resulting in 36 possible combinations. Other variants of tobacco products, for example hand-rolled cigarettes, were grouped into the four type categories listed above based on product similarities.

For microdata, we extracted relevant demographic information, including age, sex, location, and year, as well as survey metadata, including survey weights, primary sampling units, and strata. This information allowed us to tabulate individual-level data in the standard GBD five-year age-sex groups and produce accurate estimates of uncertainty. For survey report tabulations, we extracted data at the most granular age-sex group provided.

**Table 1: Data inputs for exposure for smoking.**

| Input data                    | Exposure |
|-------------------------------|----------|
| Source count (total)          | 3439     |
| Number of countries with data | 201      |

**Table 2: Data inputs for relative risks for smoking.**

| Input data                    | Relative risk |
|-------------------------------|---------------|
| Source count (total)          | 673           |
| Number of countries with data | 16            |

### ***Crosswalk***

Our GBD smoking case definitions were current smoking of any tobacco product and former smoking of any tobacco product. All other data points were adjusted to be consistent with either of these definitions. Some sources contained information on more than one case definition and these sources were used to develop the adjustment coefficient to transform alternative case definitions to the GBD case definition. The adjustment coefficient was the beta value derived from a linear model with one predictor and no intercept. We used the same crosswalk adjustment coefficients as in GBD 2017, and thus we have not included a methods explanation in this appendix, as it has been detailed previously.

### ***Age and sex splitting***

As in GBD 2017, we split data reported in broader age groups than the GBD 5-year age groups or as both sexes combined by adapting the method reported in Ng et al<sup>1</sup> to split using a sex- geography- time-specific reference age pattern. We separated the data into two sets: a training dataset, with data already falling into GBD sex-specific 5-year age groups, and a split dataset, which reported data in aggregated age or sex groups. We then used spatiotemporal Gaussian process regression (ST-GPR) to estimate sex-geography-time-specific age patterns using data in the training dataset. The estimated age patterns were used to split each source in the split dataset.

The ST-GPR model used to estimate the age patterns for age-sex splitting used an age weight parameter value that minimises the effect of any age smoothing. This parameter choice allowed the estimated age pattern to be driven by data, rather than being enforced by any smoothing parameters of the model. Because these age-sex split data points were to be incorporated in the final ST-GPR exposure model, we

did not want to doubly enforce a modelled age pattern for a given sex-location-year on a given aggregate data point.

## Modelling strategy

### **Smoking prevalence modelling**

We used ST-GPR to model current and former smoking prevalence. The model is nearly identical to that in GBD 2017. Full details on the ST-GPR method are reported elsewhere in the appendix. Briefly, the mean function input to GPR is a complete time series of estimates generated from a mixed effects hierarchical linear model plus weighted residuals smoothed across time, space, and age. The linear model formula for current smoking, fit separately by sex using restricted maximum likelihood in R, is:

$$\text{logit}(p_{g,a,t}) = \beta_0 + \beta_1 CPC_{g,t} + \sum_{k=2}^{19} \beta_k I_{A[a]} + \alpha_s + \alpha_r + \alpha_g + \epsilon_{g,a,t}$$

Where  $CPC_{g,t}$  is the tobacco consumption covariate by geography  $g$  and time  $t$ , described above,  $I_{A[a]}$  is a dummy variable indicating specific age group  $A$  that the prevalence point  $p_{g,a,t}$  captures, and  $\alpha_s$ ,  $\alpha_r$ , and  $\alpha_g$  are super-region, region, and geography random intercepts, respectively. Random effects were used in model fitting but not in prediction.

The linear model formula for former smoking is:

$$\text{logit}(p_{g,a,t}) = \beta_0 + \beta_1 PctChange_{A[a],g,t} + \beta_3 CSP_{A[a],g,t} + \sum_{k=3}^{20} \beta_k I_{A[a]} + \alpha_s + \alpha_r + \alpha_g + \epsilon_{g,a,t}$$

Where  $PctChange_{A[a],g,t}$  is the percentage change in current smoking prevalence from the previous year, and  $CSP_{A[a],g,t}$  is the current smoking prevalence by specific age group  $A$ , geography  $g$ , and time  $t$  that point  $p_{g,a,t}$  captures, both derived from the current smoking ST-GPR model defined above.

### **Supply-side estimation**

The methods for modelling supply-side-level data were changed substantially from those used in GBD 2017. The raw data were domestic supply (USDA Global Surveillance Database and UN FAO) and retail supply (Euromonitor) of tobacco. Domestic supply was calculated as production + imports - exports. The data went through three rounds of outliering. First, they were age-sex split using daily smoking prevalence to generate number of cigarettes per smoker per day for a given location-age-sex-year. If more than 12 points for a particular source-location-year (equal to over 1/3 of the split points) were above the given thresholds, that source-location-year was outliered. A point would not be outliered if it was (in cigarettes per smoker): under five (10–14 year olds); under 20 (males, 15–19 year olds); under 18 (females, 15–19 year olds); under 38/35 and over three (males/females, 20+ year olds). These thresholds were chosen by visualising histograms of the data for each age-sex, as well as with expert knowledge about reasonable consumption levels. In the second round of outliering, the mean tobacco per capita value over a 10-year window was calculated. If a point was over 70% of that mean value away

from the mean value, it was outliered. The 70% limit was chosen using histograms of these distances. Additionally, some manual outliering was performed to account for edge cases. Finally, data smoothing was performed by taking a three-year rolling mean over each location-year.

Next, a simple imputation to fill in missing years was performed for all series to remove compositional bias from our final estimates. Since the data from our main sources covered different time periods, by imputing a complete time series for each data series, we reduced the probability that compositional bias of the sources was leading to biased final estimates. To impute the missing years for each series, we modelled the log ratio of each pair of sources as a function of an intercept and nested random effects on super-region, region, and location. The appropriate predicted ratio was multiplied by each source that we did have, and then the predictions were averaged to get the final imputed value. For example, if source A was missing for a particular location-year, but sources B and C were present, then we predicted A twice: once from the modelled ratio of A to B, and again from the modelled ratio of A to C. These two predictions were then averaged. For some locations where there was limited overlap between series, the predicted ratio did not make sense, and a regional ratio was used.

Finally, variance was calculated both across series (within a location-year) as well as across years (within a location-source). Additionally, if a location-year had one imputed point was, the variance was multiplied by 2. If a location-year had two imputed points, the variance was multiplied by 4. The average estimates in each location-year were the input to an ST-GPR model. For this, we used a simple mixed effects model, which was modelled in log space with nested location random effects. Subnational estimates were then further modelled by splitting the country-level estimates using current smoking prevalence.

### Theoretical minimum-risk exposure level

The theoretical minimum-risk exposure level is 0.

#### ***Exposure among current and former smokers***

Identical to GBD 2017, we estimated exposure among current smokers for two continuous indicators: cigarettes per smoker per day and pack-years. Pack-years incorporates aspects of both duration and amount. One pack-year represents the equivalent of smoking one pack of cigarettes (assuming a 20-cigarette pack) per day for one year. Since the pack-years indicator collapses duration and intensity into a single dimension, one pack-year of exposure can reflect smoking 40 cigarettes per day for six months or smoking 10 cigarettes per day for two years.

To produce these indicators, we simulated individual smoking histories based on distributions of age of initiation and amount smoked. We informed the simulation with cross-sectional survey data capturing these indicators, modelled at the mean level for all locations, years, ages, and sexes using ST-GPR. We rescaled estimates of cigarettes per smoker per day to an envelope of cigarette consumption based on supply-side data. We estimated pack-years of exposure by summing samples from age- and time-specific distributions of cigarettes per smoker for a birth cohort in order to capture both age trends and time trends and avoid the common assumption that the amount someone currently smokes is the amount they have smoked since they began smoking. All distributions were age-, sex-, and region- specific ensemble distributions, which were found to outperform any single distribution.

We estimated exposure among former smokers using years since cessation. We utilised ST-GPR to model mean age of cessation using cross-sectional survey data capturing age of cessation. Using these

estimates, we generated ensemble distributions of years since cessation for every location, year, age group, and sex.

### Relative risk

The same risk-outcome pairs from GBD 2017 were used: tuberculosis, lower respiratory tract infections, oesophageal cancer, stomach cancer, bladder cancer, liver cancer, laryngeal cancer, lung cancer, breast cancer, cervical cancer, colorectal cancer, lip and oral cancer, nasopharyngeal cancer, other pharyngeal cancer, pancreatic cancer, kidney cancer, leukaemia, ischaemic heart disease, ischaemic stroke, haemorrhagic stroke, subarachnoid haemorrhage, atrial fibrillation and flutter, aortic aneurysm, peripheral arterial disease, chronic obstructive pulmonary disease, other chronic respiratory diseases, asthma, peptic ulcer disease, gallbladder and biliary tract diseases, Alzheimer disease and other dementias, Parkinson disease (protective), multiple sclerosis, type-II diabetes, rheumatoid arthritis, low back pain, cataracts, macular degeneration, and fracture.

### *Dose-response risk curves*

Input data for relative risks were nearly the same as in GBD 2017. The only addition was for chronic obstructive pulmonary disease, for which a few additional studies were included. We synthesised effect sizes by cigarettes per smoker per day, pack-years, and years since quitting from cohort and case-control studies to produce nonlinear dose-response curves using a Bayesian meta-regression model. For outcomes with significant differences in effect size by sex or age, we produced sex- or age-specific risk curves.

We estimated risk curves of former smokers compared to never smokers taking into account the rate of risk reduction among former smokers seen in the cohort and case-control studies, and the cumulative exposure among former smokers within each age, sex, location, and year group.

### Population attributable fraction (PAF)

As in GBD 2017, we estimated PAFs based on the following equation:

$$PAF = \frac{p(n) + p(f) \int \exp(x) * rr(x) + p(c) \int \exp(y) * rr(y) - 1}{p(n) + p(f) \int \exp(x) * rr(x) + p(c) \int \exp(y) * rr(y)}$$

where  $p(n)$  is the prevalence of never smokers,  $p(f)$  is the prevalence of former smokers,  $p(c)$  is the prevalence of current smokers,  $\exp(x)$  is a distribution of years since quitting among former smokers,  $rr(x)$  is the relative risk for years since quitting,  $\exp(y)$  is a distribution of cigarettes per smoker per day or pack-years, and  $rr(y)$  is the relative risk for cigarettes per smoker per day or pack-years.

We used pack-years as the exposure definition for cancers and chronic respiratory diseases, and cigarettes per smoker per day for cardiovascular diseases and all other health outcomes.

### References

1. Ng M, Freeman MK, Fleming TD, Robinson M, Dwyer-Lindgren L, Thomson B, et al. Smoking Prevalence and Cigarette Consumption in 187 Countries, 1980–2012. *JAMA*. 2014 Jan 8;311(2):183–92.

# Secondhand smoke

## Flowchart

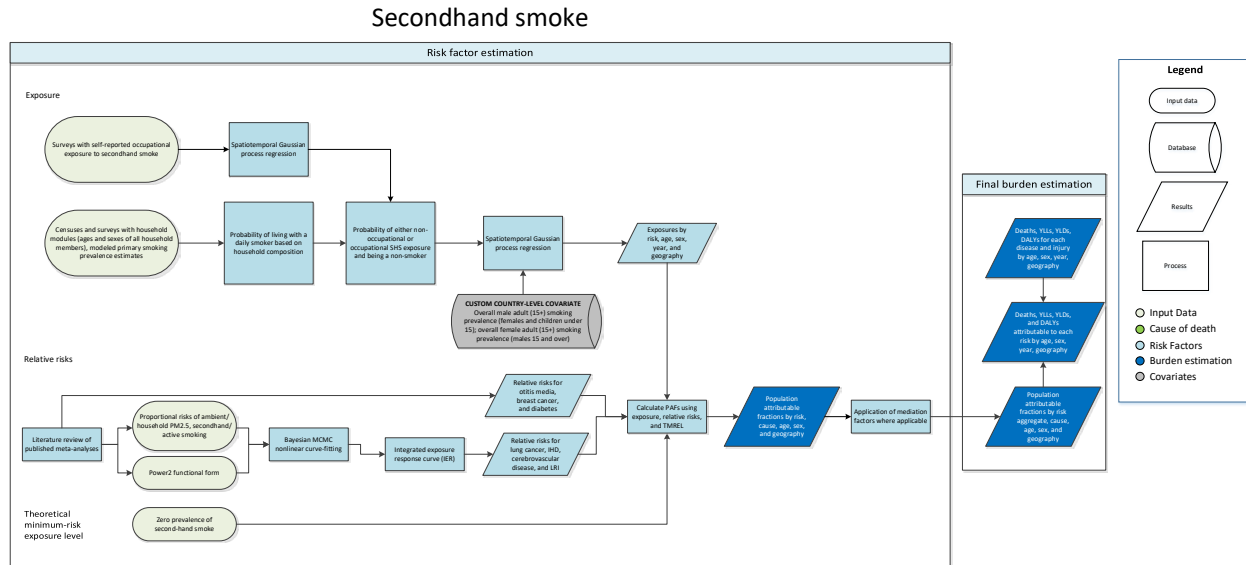

## Exposure

### Case definition

We define secondhand smoke exposure as current exposure to secondhand tobacco smoke at home, at work, or in other public places. We use household composition as a proxy for non-occupational secondhand smoke exposure and make the assumption that all persons living with a daily smoker are exposed to tobacco smoke. We use surveys to estimate the proportion of individuals exposed to secondhand smoke at work. We only consider non-smokers to be exposed to secondhand smoke. Non-smokers are defined as all persons who are not daily smokers. Ex-smokers and occasional smokers are considered non-smokers in this analysis. Exposure is evaluated for both children and adults.

### Input data

To calculate the proportion of non-smokers who live with at least one smoker, we used unit record data on household composition, which included the ages and sexes of all persons living in the same household. Our sources included representative major survey series with a household composition module, including the Demographic Health Surveys (DHS), the Multiple Indicator Cluster Surveys (MICS), and the Living Standards Measurement Surveys (LSMS); and national and subnational censuses, which included those captured in the IPUMS project and identified using the Global Health Data Exchange catalog (GHDx).

To calculate the proportion of individuals exposed to secondhand smoke at work, by age and sex, we used cross-sectional surveys that ask respondents about self-reported occupational secondhand smoke exposure. Sources include the Global Adult Tobacco Surveys, Eurobarometer Surveys, and WHO STEPS Surveys. We identified sources using the GHDx.

No major changes have been introduced to data inputs since 2016. A new systematic review is planned for the next GBD round. Table 1 summarizes exposure input data.

| Input data                    | Exposure |
|-------------------------------|----------|
| Source count (total)          | 721      |
| Number of countries with data | 153      |

Given the nature of the data used in our models (microdata), no crosswalk for case definition adjustment or age- and sex-splitting processes were required. Estimates of daily smoking prevalence in each location were also used in our calculations, as described in the modelling strategy section below.

### Modelling strategy

Identical to GBD 2017, we estimated the probability that each person is living with a smoker and is also a non-smoker themselves using set theory. First, household composition data were used at the individual level to capture the ages and sexes of each person in the household. Second, we analysed surveys with both household composition data and tobacco use questions and determined that the distribution of household size, mean age of the household members, and the age distribution were not significantly different between households with and without a self-reported smoker. Since we did not find that household composition varied between smokers and non-smokers, we then used the GBD 2019 primary daily smoking prevalence model to calculate the probability that each household member is a daily smoker. Next, we used the probability of the union of sets on each individual household member to calculate the overall probability that at least one of the other household members was a daily smoker. As in GBD 2017, we incorporated occupational exposure by modelling prevalence of current exposure to secondhand smoke at work, by age, sex, location, and year, using ST-GPR. In order to avoid double counting we calculated the probability that an individual is exposed through either non-occupational exposure or occupational exposure, given their age, sex, and household composition. Finally, we multiplied this probability of exposure by the probability that the individual is not a smoker themselves (ie, 1 minus primary daily smoking prevalence for that person's location, year, age, and sex). We then collapsed these individual-level probabilities to produce average probabilities of exposure by location, year, age, and sex.

These probabilities were modelled in the GBD ST-GPR framework, which generates exposure estimates from a mixed effects hierarchical linear model plus weighted residuals smoothed across time, space, and age. The linear model formula was fit separately by sex using restricted maximum likelihood in R.

We used the sex-specific overall daily smoking prevalence for adults (age 15 and older) as a country-level covariate in the model. The overall male adult daily smoking prevalence was used as the covariate for females of all ages and for males under age 15. The overall female adult daily smoking prevalence was used as the covariate for males age 15 and older.

All input datapoints from the probability calculation had a measure of uncertainty (variance and sample size) coming from the uncertainty of the primary smoking prevalence model and the sample size from

the unit record data going into the modelling process. Geographical random effects were used in model fitting but were not used in prediction.

### Theoretical minimum-risk exposure level

The theoretical minimum-risk exposure level for secondhand smoke is zero exposure among non-smokers, meaning that non-smokers would not live with any primary smokers.

### Relative risks

The same risk-outcome pairs from GBD 2017 were used. For children ages 0-14, we estimated the burden of otitis media attributable to secondhand smoke exposure. For all ages we estimated the burden of lower respiratory infections (LRI), and for adults greater than or equal to 25 years of age we estimated the burden of lung cancer, chronic obstructive pulmonary disease (COPD), ischaemic heart disease, and cerebrovascular disease attributable to secondhand smoke exposure, breast cancer, and type 2 diabetes.

For lung cancer, ischaemic heart disease, cerebrovascular disease, and LRI, we used country-specific relative risks created using integrated exposure response curves (IER) for PM<sub>2.5</sub> air pollution. IER curve calculation was updated with the GBD 2019 cigarettes per smoker estimates. The relative risks for otitis media<sup>1</sup>, breast cancer<sup>2</sup>, and diabetes<sup>3</sup> are derived from published meta-analyses and are the same as the ones used in the previous GBD cycle. Table 2 summarizes relative risk input data.

| Input data                    | Exposure |
|-------------------------------|----------|
| Source count (total)          | 232      |
| Number of countries with data | 34       |

We used the standard GBD population attributable fraction (PAF) equation to estimate burden based on exposure and relative risks.

### References

1. Jones LL, Hassanien A, Cook DG, Britton J, Leonardi-Bee J. Parental smoking and the risk of middle ear disease in children. *Arch Pediatr Adolesc Med*. 2012; 166: 18–27.
2. Macacu A, Autier P, Boniol M, Boyle P. Active and passive smoking and risk of breast cancer: a meta-analysis. *Breast Cancer Res Treat* 2015; 154:213–224.
3. Zhu B, Wu X, Wang X, Zheng Q, Sun G. The association between passive smoking and type 2 diabetes: a meta-analysis. *Asia-Pacific Journal of Public Health* 2014; 26:226-237.

# Ambient particulate matter pollution

## Flowchart

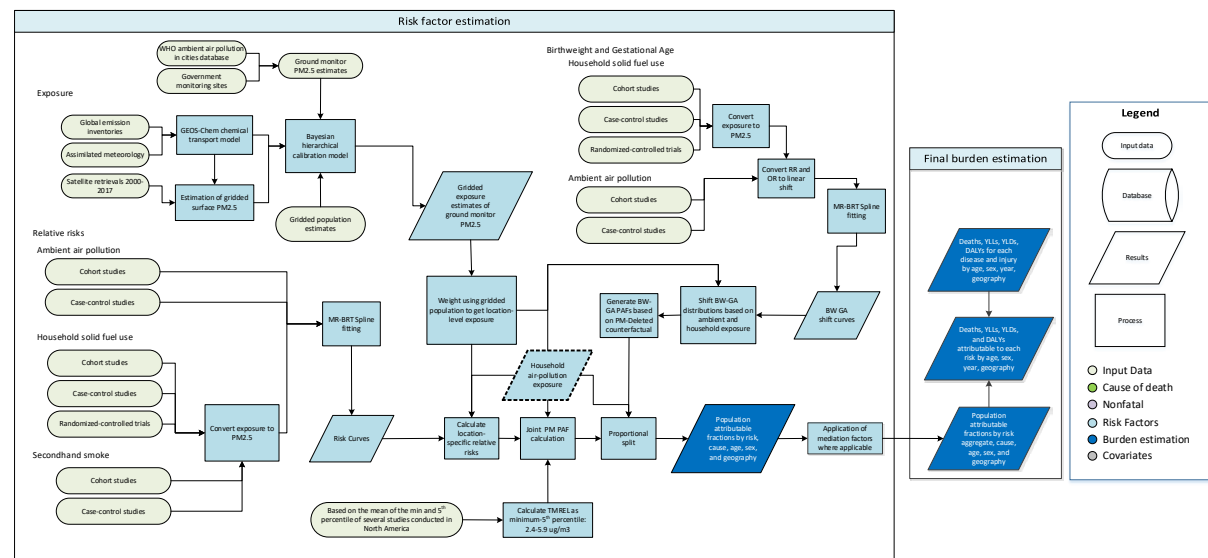

## Input data and modelling strategy

### Exposure

#### Definition

Exposure to ambient particulate matter pollution is defined as the population-weighted annual average mass concentration of particles with an aerodynamic diameter less than 2.5 micrometers ( $PM_{2.5}$ ) in a cubic meter of air. This measurement is reported in  $\mu g/m^3$ .

#### Input data

The data used to estimate exposure to ambient particulate matter pollution comes from multiple sources, including satellite observations of aerosols in the atmosphere, ground measurements, chemical transport model simulations, population estimates, and land-use data. Table 1 summarizes exposure input data.

**Table 1: Exposure Input Data**

| Input data                    | Exposure |
|-------------------------------|----------|
| Source count (total)          | 663      |
| Number of countries with data | 114      |

The following details the updates in methodology and input data used in GBD 2019.

#### ***PM<sub>2.5</sub> ground measurement database***

Ground measurements used for GBD 2019 include updated measurements from sites included in 2017 and additional measurements from new locations. New and up-to-date data (mainly from the USA, Canada, EU, Bangladesh, China and USA embassies and consulates), were added to the data

from the 2018 update of the WHO Global Ambient Air Quality Database used in GBD 2017. The updated data included measurements of concentrations of PM<sub>10</sub> and PM<sub>2.5</sub> from 10,408 ground monitors from 116 countries from 2010 to 2017. The majority of measurements were recorded in 2016 and 2017 (as there is a lag in reporting measurements, few data from 2018 or newer were available). Annual averages were excluded if they were based on less than 75% coverage within a year. If information on coverage was not available, then data were included unless there were already sufficient data within the same country (monitor density greater than 0.1).

For locations measuring only PM<sub>10</sub>, PM<sub>2.5</sub> measurements were estimated from PM<sub>10</sub>. This was performed using a hierarchy of conversion factors (PM<sub>2.5</sub>/PM<sub>10</sub> ratios): (i) for any location a 'local' conversion factor was used, constructed as the ratio of the average measurements (of PM<sub>2.5</sub> and PM<sub>10</sub>) from within 50km of the location of the PM<sub>10</sub> measurement, and within the same country, if such measurements were available; (ii) if there was not sufficient local information to construct a conversion factor then a country-wide conversion factor was used; and (iii) if there was no appropriate information within a country, then a regional factor was used. In each case, to avoid the possible effects of outliers in the measured data (both PM<sub>2.5</sub> and PM<sub>10</sub>), extreme values of the ratios were excluded (defined as being greater/lesser than the 95% and 5% quantiles of the empirical distributions of conversion factors). As with GBD 2013, 2015, 2016, and 2017 databases, in addition to values of PM<sub>2.5</sub> and whether they were direct measurement or converted from PM<sub>10</sub>, the database also included additional information, where available, related to the ground measurements such as monitor geo-coordinates and monitor site type.

### ***Satellite-based estimates***

The global geophysical PM<sub>2.5</sub> estimates for the years 2000–2017 are from Hammer and colleagues Version V4.GL.03.NoGWR used at 0.1°x0.1° resolution (~11 x 11 km resolution at the equator).<sup>1</sup> The method is based on the algorithms of van Donkelaar and colleagues (2016) as used in GBD 2017,<sup>2</sup> with updated satellite retrievals, chemical transport modelling, and ground-based monitoring. The algorithm uses aerosol optical depth (AOD) from several updated satellite products (MAIAC, MODIS C6.1, and MISR v23), including finer resolution, increased global coverage, and improved long-term stability. Ground-based observations from a global sunphotometer network (AERONET version 3) are used to combine different AOD information sources. This is the first time that data from MAIAC at 1 km resolution was used to estimate PM<sub>2.5</sub> at the global scale. The GEOS-Chem chemical transport model with updated algorithms was used for geophysical relationships between surface PM<sub>2.5</sub> and AOD. Updates to the GEOS-Chem simulation included improved representation of mineral dust and secondary organic aerosol, as well as updated emission inventories. The resultant geophysical PM<sub>2.5</sub> estimates are highly consistent with ground monitors worldwide ( $R^2=0.81$ , slope = 1.03, n = 2541).

### ***Population data***

A comprehensive set of population data, adjusted to match UN2015 Population Prospectus, on a high-resolution grid was obtained from the Gridded Population of the World ([GPW](#)) database. Estimates for 2000, 2005, 2010, 2015, and 2020 were available from GPW version 4, with estimates for 1990 and 1995 obtained from the GPW version 3. These data are provided on a 0.0083°x 0.0083° resolution. Aggregation to each 0.1°x0.1° grid cell was accomplished by summing the central 12 x 12 population cells. Populations estimates for 2001–2004, 2006–2009, 2011–2014 and 2016–2019 were obtained by interpolation using natural splines with knots placed at 2000, 2005, 2010, 2015, and 2020. This was performed for each grid cell.

### ***Chemical transport model simulations***

Estimates of the sum of particulate sulfate, nitrate, ammonium, and organic carbon and the compositional concentrations of mineral dust simulated using the GEOS Chem chemical transport model, and a measure combining elevation and the distance to the nearest urban land surface (as described in van Donkelaar and colleagues 2016<sup>2</sup> and Hammer and colleagues (submitted))<sup>1</sup> were available for 2000–2017 for each 0.1°×0.1° grid cell.

### **Modelling strategy**

The following is a summary of the modelling approach, known as the Data Integration Model for Air Quality (DIMAQ) used in GBD 2015, 2016, 2017, and now in GBD 2019.<sup>3,4</sup>

Before the implementation of DIMAQ (ie, in GBD 2010 and GBD 2013), exposure estimates were obtained using a single global function to calibrate available ground measurements to a “fused” estimate of PM<sub>2.5</sub>; the mean of satellite-based estimates and those from the TM5 chemical transport model, calculated for each 0.1°×0.1° grid cell. This was recognised to represent a tradeoff between accuracy and computational efficiency when utilising all the available data sources. In particular, the GBD 2013 exposure estimates were known to underestimate ground measurements in specific locations (see discussion in Brauer and colleagues, 2015).<sup>5</sup> This underestimation was largely due to the use of a single, global calibration function, whereas in reality the relationship between ground measurements and other variables will vary spatially.

In GBD 2015 and GBD 2016, coefficients in the calibration model were estimated for each country. Where data were insufficient within a country, information can be “borrowed” from a higher aggregation (region) and, if enough information is still not available, from an even higher level (super-region). Individual country-level estimates were therefore based on a combination of information from the country, its region, and its super-region. This was implemented within a Bayesian hierarchical modelling (BHM) framework. BHMs provide an extremely useful and flexible framework in which to model complex relationships and dependencies in data. Uncertainty can also be propagated through the model, allowing uncertainty arising from different components, both data sources and models, to be incorporated within estimates of uncertainty associated with the final estimates. The results of the modelling comprise a posterior distribution for each grid cell, rather than just a single point estimate, allowing a variety of summaries to be calculated. The primary outputs here are the median and 95% credible intervals for each grid cell. Based on the availability of ground measurement data, modelling and evaluation were focused on the year 2016.

The model used in GBD 2017 and GBD 2019 also included within-country calibration variation.<sup>6</sup> The model used for GBD 2019, henceforth referred to as DIMAQ2, provides a number of substantial improvements over the initial formulation of DIMAQ. In DIMAQ, ground measurements from different years were all assumed to have been made in the primary year of interest and then regressed against values from other inputs (eg, satellites, etc.) made in that year. In the presence of changes over time, therefore, and particularly in areas where no recent measurements were available, there was the possibility of mismatches between the ground measurements and other variables. In DIMAQ2, ground measurements were matched with other inputs (over time), and the (global-level) coefficients were allowed to vary over time, subject to smoothing that is induced by a first-order random walk process. In addition, the manner in which spatial variation can be incorporated within the model has developed: where there are sufficient data, the calibration equations can now vary (smoothly) both within and between countries, achieved by allowing the coefficients to follow (smooth) Gaussian processes. Where there are insufficient data within a

country, to produce accurate equations, as before, information is borrowed from lower down the hierarchy and it is supplemented with information from the wider region.

DIMAQ2 as described above is used for all regions except for the north Africa and Middle East and sub-Saharan Africa super-regions, where there are insufficient data across years to allow the extra complexities of the new model to be implemented. In these super-regions, a simplified version of DIMAQ2 is used in which the temporal component is dropped.

### **Model evaluation**

Model development and comparison was performed using within- and out-of-sample assessment. In the evaluation, cross-validation was performed using 25 combinations of training (80%) and validation (20%) datasets. Validation sets were obtained by taking a stratified random sample, using sampling probabilities based on the cross-tabulation of PM<sub>2.5</sub> categories (0-24.9, 25-49.9, 50-74.9, 75-99.9, 100+ µg/m<sup>3</sup>) and super-regions, resulting in them having the same distribution of PM<sub>2.5</sub> concentrations and super-regions as the overall set of sites. The following metrics were calculated for each training/evaluation set combination: for model fit – R<sup>2</sup> and deviance information criteria (DIC, a measure of model fit for Bayesian models); for predictive accuracy – root mean squared error (RMSE) and population weighted root mean squared error (PwRMSE). The median R<sup>2</sup> was 0.9, and the median PwRMSE was 10.1 µg/m<sup>3</sup>.

All modelling was performed on the log-scale. The choice of which variables were included in the model was made based on their contribution to model fit and predictive ability. The following is a list of variables and model structures that were included in DIMAQ.

Continuous explanatory variables:

- (SAT) Estimate of PM<sub>2.5</sub> (in µg/m<sup>3</sup>) from satellite remote sensing on the log-scale.
- (POP) Estimate of population for the same year as SAT on the log-scale.
- (SNAOC) Estimate of the sum of sulfate, nitrate, ammonium, and organic carbon simulated using the GEOS Chem chemical transport model.
- (DST) Estimate of compositional concentrations of mineral dust simulated using the GEOS-Chem chemical transport model.
- (EDxDU) The log of the elevation difference between the elevation at the ground measurement location and the mean elevation within the GEOS Chem simulation grid cell multiplied by the inverse distance to the nearest urban land surface.

Discrete explanatory variables:

- (LOC) Binary variable indicating whether exact location of ground measurement is known.
- (TYPE) Binary variable indicating whether exact type of ground monitor is known.
- (CONV) Binary variable indicating whether ground measurement is PM<sub>2.5</sub> or converted from PM<sub>10</sub>.

Interactions:

- Interactions between the binary variables and the effects of SAT.

Random effects:

- Regional temporal (random walk) hierarchical random-effects on the intercept
- Regional hierarchical random-effects for the coefficient associated with SAT
- Regional hierarchical random-effects for the coefficient associated with POP
- Smoothed, spatially varying random-effects for the intercept

- Smoothed, spatially varying random-effects for the coefficient associated with SAT

### ***Inference and prediction***

Due to both the complexity of the models and the size of the data, notably the number of spatial predictions that are required, recently developed techniques that perform “approximate” Bayesian inference based on integrated nested Laplace approximations (INLA) were used.<sup>7</sup> Computation was performed using the R interface to the INLA computational engine ([R-INLA](#)). GBD 2019 also makes use of an innovation in the way that samples from the (Bayesian) model are used to represent distributions of estimated concentrations in each grid-cell. Here estimates, and distributions representing uncertainty, of concentrations for each grid are obtained by taking repeated (joint) samples from the posterior distributions of the parameters and calculating estimates based on a linear combination of those samples and the input variables.<sup>8</sup>

DIMAQ2 was used to produce estimates of ambient PM<sub>2.5</sub> for 1990, 1995, and 2010–2019 by matching the gridded estimates with the corresponding coefficients from the calibration. As there is a lag in reporting ambient air pollution based quantities, the input variables were extrapolated (as in GBD 2017), allowing estimates for 2018 and 2019 to be produced in the same way as other years and, crucially, allowing measures of uncertainty to be produced within the BHM framework rather than by using post-hoc approximations.

Estimates from the satellites and the GEOS-Chem chemical transport model in 2018 and 2019 were produced by extrapolating estimates from 2000–2017 using generalised additive models,<sup>9</sup> on a cell-by-cell basis, except in those grid cells that saw a >100% increase between 2016 and 2017, in which case only the 2000–2016 estimates were used for extrapolating, in order to avoid unrealistic and/or unjustified extrapolation of trends. Population estimates for 2018 and 2019 were obtained by interpolation as described above.

### **Theoretical minimum-risk exposure level**

The TMREL was assigned a uniform distribution with lower/upper bounds given by the average of the minimum and fifth percentiles of outdoor air pollution cohort studies exposure distributions conducted in North America, with the assumption that current evidence was insufficient to precisely characterise the shape of the concentration-response function below the fifth percentile of the exposure distributions. The TMREL was defined as a uniform distribution rather than a fixed value in order to represent the uncertainty regarding the level at which the scientific evidence was consistent with adverse effects of exposure. The specific outdoor air pollution cohort studies selected for this averaging were based on the criteria that their fifth percentiles were less than that of the American Cancer Society Cancer Prevention II (CPSII) cohort’s fifth percentile of 8.2 based on Turner and colleagues (2016).<sup>10</sup> This criterion was selected since GBD 2010 used the minimum, 5.8, and fifth percentile solely from the CPS II cohort. The resulting lower/upper bounds of the distribution for GBD 2019 were 2.4 and 5.9. This has not changed since GBD 2015.

### **Relative risks and population attributable fractions**

We create one set of cause-specific risk curves for both household air pollution and ambient air pollution as two different sources of PM<sub>2.5</sub>. In GBD 2017, we estimated the particulate matter-attributable burden of disease based on the relation of long-term exposure to PM<sub>2.5</sub> with Ischemic Heart Disease, stroke (ischemic and hemorrhagic), COPD, lung cancer, acute lower respiratory infection, and Type II Diabetes. In GBD 2019, we added adverse birth outcomes including low birthweight and short gestation. Because these are already risk factors (and not outcomes) in the

GBD, we performed a mediation analysis, in which a proportion of the burden attributable to low birthweight and short gestation was attributed to PM<sub>2.5</sub> pollution.

For the six non-mediated outcomes, we used results from cohort and case-control studies of ambient PM<sub>2.5</sub> pollution, cohort studies, case-control studies, and randomised-controlled trials of household use of solid fuel for cooking, and cohort and case-control studies of secondhand smoke. For the first time in GBD 2019, we no longer use active smoking data in the risk curves

For GBD 2019, we made several important changes to the risk functions. Previously, we have used relative risk estimates for active smoking, converting cigarettes-per-day to PM<sub>2.5</sub> exposure in order to estimate the PM<sub>2.5</sub> relative risk at the highest end of the PM<sub>2.5</sub> exposure-response curve. We took this approach because the vast majority of the air pollution epidemiological studies have been performed in low-pollution settings in high-income countries, preventing us from extrapolating the steep relationship at the beginning of the exposure range to locations with high exposure but no relative risk estimates, such as India and China. However, with the recent publication of studies in China and other higher-exposure settings and additional studies of HAP, we have been able to include more estimates at high PM<sub>2.5</sub> levels in the model.<sup>11,12,13,14,15</sup> Furthermore, in contrast to previous cycles of the GBD where the power function used to develop the IER required the inclusion of active smoking data to anchor the risk function, with the current use of splines and their flexibility, it is easier to fit functions to the (ambient, household, and SHS) data without active smoking data. Beginning in GBD 2019, we excluded active smoking studies from the risk curves. Removal of active smoking information removes an important source of uncertainty in our earlier estimates related to differences in dose rates and other aspects of exposure between active smoking and the other PM<sub>2.5</sub> sources, including differences in voluntary (active smoking) and involuntary (ambient and household PM<sub>2.5</sub>, secondhand smoke) exposure.<sup>16,17</sup>

Additionally, in the past, we have built the curves for ischaemic heart disease and stroke based on studies of mortality and used evidence from three studies of both mortality and incidence to scale down the mortality curves to generate estimates of incidence risk. This year we extracted incidence and mortality from all available studies and included this as a covariate in the model. There was no significant difference between estimates of incidence risk and mortality risk, so we included both types of risk estimates in the curve fitting and used the same curve for both incidence and mortality. This is what was done for all other outcomes in the past and in GBD 2019.

For cardiovascular diseases, evidence suggests that the relative risk decreases with age.<sup>18</sup> To account for this in our model, we generate unique risk curves for every five-year age group from 25–29 to 95 and older for both ischaemic heart disease and stroke. Because we do not have risk data for every unique age group, we adjust each study based on the median age during follow-up to generate a full adjusted dataset for every curve. We calculate the median age of follow-up by taking the median (or mean) age at enrollment and adding one-half of median or mean follow-up time. If follow-up time is not available, we take 70% of total study period based on the observed ratio of follow-up time to total study period for other studies.

Once we have a median age during follow-up ( $a$ ), we extrapolate each study to the full set of ages where the estimated datapoint for age,  $a_j$ , is calculated with the following equation and accompanying explanatory figure:

$$\log(RR)_{a_j} = \frac{\log(RR)_a - 0}{a - 110} * (a_j - 110)$$

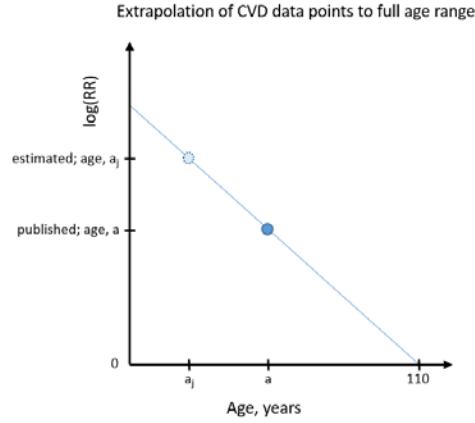

Previously we have used a fixed functional form to fit the risk curves.<sup>16</sup> In GBD 2019, we used MR-BRT (described in detail elsewhere) splines to fit the risk data with a more flexible shape. While previously we built in the TMREL estimates into the model fitting, this year we have fit the curve beginning at zero exposure and incorporate the TMREL into the relative risk calculation process. This allows others to use our risk curves with whatever counterfactual level is of interest to them. Relative risk curves are available upon request.

When fitting the risk curves, we consider the published relative risk over a range of exposure data. For OAP studies, the relative risk informs the curve from the fifth to the 95<sup>th</sup> percentile of observed exposure. When this is not available in the published study, we estimate the distribution from the provided information (mean and standard deviation, mean and IQR, etc.). We scale the RR to this range.

For HAP studies, we allow each study to inform the curve from the  $\text{Exp}_{\text{OAP}}$  to  $\text{Exp}_{\text{OAP}} + \text{Exp}_{\text{HAP}}$ , where  $\text{Exp}_{\text{OAP}}$  is the GBD 2017 estimate of the ambient exposure level in the study location and year, and  $\text{Exp}_{\text{HAP}}$  is the GBD 2017 estimate of the excess exposure for those who use solid fuel for cooking in the study location and year.

For SHS studies, we updated our strategy of exposure estimation in GBD 2019. For the first time, we are also accounting for outdoor exposure. Similar to the approach used for HAP, we allow each study to inform the curve from the  $\text{Exp}_{\text{OAP}}$  to  $\text{Exp}_{\text{OAP}} + \text{Exp}_{\text{SHS}}$ , where  $\text{Exp}_{\text{OAP}}$  is the GBD 2017 estimate of the ambient exposure level in the study location and year, and  $\text{Exp}_{\text{SHS}}$  is an estimate of the excess exposure for those who experience secondhand smoke. This is estimated from the number of cigarettes smoked per smoker per day in a given location and year, estimated by the smoking team of GBD, and from a study in Sweden, which measured the  $\text{PM}_{2.5}$  exposure in homes of smokers.<sup>19</sup> We divided the household  $\text{PM}_{2.5}$  exposure level by the average number of cigarettes smoked per smoker per day in Sweden over the study duration to estimate the SHS  $\text{PM}_{2.5}$  exposure per cigarette ( $2.31 \mu\text{g}/\text{m}^3$  [95% UI 1.53–3.39]). To calculate  $\text{Exp}_{\text{SHS}}$  we multiplied the estimated number of cigarettes per smoker per day by the average  $\text{PM}_{2.5}$  exposures per cigarette to generate a predicted  $\text{PM}_{2.5}$  exposure level.

### **MR-BRT risk splines**

We fit splines on the datasets including studies of OAP, HAP, and SHS using the following functional form, where  $X$  and  $X_{\text{CF}}$  represent the range of exposure characterised by the effect size:

$$\log \left( \frac{\text{MRBRT}(X)}{\text{MRBRT}(X_{\text{CF}})} \right) \sim \log(\text{Published Effect Size})$$

For each of the risk-outcome pairs, we tested various model settings and priors in fitting the MR-BRT splines. The final models used third-order splines with two interior knots and a constraint on the right-most segment, forcing the fit to be linear rather than cubic. We used an ensemble approach to knot placement, wherein 100 different models were run with randomly placed knots and then combined by weighting based on a measure of fit that penalises excessive changes in the third derivative of the curve. Knots were free to be placed anywhere within the fifth and 95th percentile of the data, as long as a minimum width of 10% of that domain exists between them. We included shape constraints so that the risk curves were concave down and monotonically increasing, the most biologically plausible shape for the PM<sub>2.5</sub> risk curve. On the non-linear segments, we included a Gaussian prior on the third derivative of mean 0 and variance 0.01 to prevent over-fitting; on the linear segment, a stronger prior of mean 0 and variance 1e-6 was used to ensure that the risk curves do not continue to increase beyond the range of the data.

For chronic obstructive pulmonary disease, we used a looser Gaussian prior of mean 0 and variance 1e-4 on the linear segment of the risk function. For this outcome, we have epidemiological evidence from household air pollution that the risk continues to increase at higher levels of PM<sub>2.5</sub>.

Table 2 summarizes relative risk input data for ambient particulate matter pollution and household air pollution.

**Table 2: Relative Risk Input Data**

| Input data                    | Relative risk |
|-------------------------------|---------------|
| Source count (total)          | 200           |
| Number of countries with data | 40            |

The following table includes all ambient and household sources used in generating risk curves.

| Source | Citation                                                                                                                                                                                                                                                                                                        |
|--------|-----------------------------------------------------------------------------------------------------------------------------------------------------------------------------------------------------------------------------------------------------------------------------------------------------------------|
| 1      | Abusalah A, Gavana M, Haidich AB, Smyrnakis E, Papadakis N, Papanikolaou A, Benos A. Low birth weight and prenatal exposure to indoor pollution from tobacco smoke and wood fuel smoke: a matched case-control study in Gaza Strip. <i>Matern Child Health J.</i> 2012; 16(8): 1718-27.                         |
| 2      | Akhtar T, Ullah Z, Khan MH, Nazli R. Chronic bronchitis in women using solid biomass fuel in rural Peshawar, Pakistan. <i>Chest.</i> 2007; 132(5): 1472–5.                                                                                                                                                      |
| 3      | Alam DS, Chowdhury MAH, Siddiquee AT, Ahmed S, Hossain MD, Pervin S, Streatfield K, Cravioto A, Niessen LW. Adult Cardiopulmonary Mortality and Indoor Air Pollution: A 10-Year Retrospective Cohort Study in a Low-Income Rural Setting. <i>Glob Heart.</i> 2012; 7(3): 215–21.                                |
| 4      | Alexander DA, Northcross A, Karrison T, Morhasson-Bello O, Wilson N, Atalabi OM, Dutta A, Adu D, Ibigbami T, Olamijulo J, Adepoju D, Ojengbede O, Olopade CO. Pregnancy outcomes and ethanol cook stove intervention: A randomized-controlled trial in Ibadan, Nigeria. <i>Environ Int.</i> 2018; 111: 152-163. |
| 5      | Al-Sonboli N, Hart CA, Al-Aghbari N, Al-Ansi A, Ashoor O, Cuevas LE. Human metapneumovirus and respiratory syncytial virus disease in children, Yemen. <i>Emerg Infect Dis.</i> 2006; 12(9): 1437–9.                                                                                                            |
| 6      | Atkinson RW, Carey IM, Kent AJ, van Staa TP, Anderson HR, Cook DG. Long-term exposure to outdoor air pollution and the incidence of chronic obstructive pulmonary disease in a national English cohort. <i>Occup Environ Med.</i> 2015; 72(1): 42–8.                                                            |
| 7      | Azizi BH, Zulkifli HI, Kasim MS. Protective and risk factors for acute respiratory infections in hospitalized urban Malaysian children: a case control study. <i>Southeast Asian J Trop Med Public Health.</i> 1995; 26(2): 280–5.                                                                              |
| 8      | Balakrishnan K, Ghosh S, Thangavel G, Sambandam S, Mukhopadhyay K, Puttaswamy N, Sadasivam A, Ramaswamy P, Johnson P, Kuppuswamy R, Natesan D, Maheshwari U, Natarajan A, Rajendran G, Ramasami R, Madhav S, Manivannan S, Nargunanadan S, Natarajan S, Saidam S, Chakraborty M, Balakrishnan L,                |

| Source | Citation                                                                                                                                                                                                                                                                                                                                                                                                                                                                                                                                                                                                                                                                                                                                                                                                                                                                                                                                                                                                                                             |
|--------|------------------------------------------------------------------------------------------------------------------------------------------------------------------------------------------------------------------------------------------------------------------------------------------------------------------------------------------------------------------------------------------------------------------------------------------------------------------------------------------------------------------------------------------------------------------------------------------------------------------------------------------------------------------------------------------------------------------------------------------------------------------------------------------------------------------------------------------------------------------------------------------------------------------------------------------------------------------------------------------------------------------------------------------------------|
|        | Thanasekaraan V. Exposures to fine particulate matter (PM <sub>2.5</sub> ) and birthweight in a rural-urban, mother-child cohort in Tamil Nadu, India. <i>Environ Res.</i> 2018; 161: 524–31.                                                                                                                                                                                                                                                                                                                                                                                                                                                                                                                                                                                                                                                                                                                                                                                                                                                        |
| 9      | Basu R, Harris M, Sie L, Malig B, Broadwin R, Green R. Effects of fine particulate matter and its constituents on low birth weight among full-term infants in California. <i>Environ Res.</i> 2014; 128: 42–51.                                                                                                                                                                                                                                                                                                                                                                                                                                                                                                                                                                                                                                                                                                                                                                                                                                      |
| 10     | Beelen R, Hoek G, van den Brandt PA, Goldbohm RA, Fischer P, Schouten LJ, Jerrett M, Hughes E, Armstrong B, Brunekreef B. Long-Term Effects of Traffic-Related Air Pollution on Mortality in a Dutch Cohort (NLCS-AIR Study) [Unpublished data]. <i>Environ Health Perspect.</i> 2008; 116(2): 196–202.                                                                                                                                                                                                                                                                                                                                                                                                                                                                                                                                                                                                                                                                                                                                              |
| 11     | Beelen R, Hoek G, van den Brandt PA, Goldbohm RA, Fischer P, Schouten LJ, Jerrett M, Hughes E, Armstrong B, Brunekreef B. Long-Term Effects of Traffic-Related Air Pollution on Mortality in a Dutch Cohort (NLCS-AIR Study). <i>Environ Health Perspect.</i> 2008; 116(2): 196–202.                                                                                                                                                                                                                                                                                                                                                                                                                                                                                                                                                                                                                                                                                                                                                                 |
| 12     | Beelen R, Stafoggia M, Raaschou-Nielsen O, Andersen ZJ, Xun WW, Katsouyanni K, Dimakopoulou K, Brunekreef B, Weinmayr G, Hoffmann B, Wolf K, Samoli E, Houthuijs D, Nieuwenhuijsen M, Oudin A, Forsberg B, Olsson D, Salomaa V, Lanki T, Yli-Tuomi T, Oftedal B, Aamodt G, Nafstad P, De Faire U, Pedersen NL, Östenson CG, Fratiglioni L, Penell J, Korek M, Pyko A, Eriksen KT, Tjønneland A, Becker T, Eeftens M, Bots M, Meliefste K, Wang M, Bueno-de-Mesquita B, Sugiri D, Krämer U, Heinrich J, de Hoogh K, Key T, Peters A, Cyrus J, Concin H, Nagel G, Ineichen A, Schaffner E, Probst-Hensch N, Dratva J, Ducret-Stich R, Vilier A, Clavel-Chapelon F, Stempfelet M, Grioni S, Krogh V, Tsai MY, Marcon A, Ricceri F, Sacerdote C, Galassi C, Migliore E, Ranzi A, Cesaroni G, Badaloni C, Forastiere F, Tamayo I, Amiano P, Dorronsoro M, Katsoulis M, Trichopoulou A, Vineis P, Hoek G. Long-term exposure to air pollution and cardiovascular mortality: an analysis of 22 European cohorts. <i>Epidemiology.</i> 2014; 25(3): 368–378. |
| 13     | Bell ML, Belanger K, Ebisu K, Gent JF, Lee HJ, Koutrakis P, Leaderer BP. Prenatal Exposure to Fine Particulate Matter and Birth Weight: Variations by Particulate Constituents and Sources. <i>Epidemiology.</i> 2010; 21(6): 884–91.                                                                                                                                                                                                                                                                                                                                                                                                                                                                                                                                                                                                                                                                                                                                                                                                                |
| 14     | Bell ML, Ebisu K, Belanger K. Ambient Air Pollution and Low Birth Weight in Connecticut and Massachusetts. <i>Environ Health Perspect.</i> 2007; 115(7): 1118–24.                                                                                                                                                                                                                                                                                                                                                                                                                                                                                                                                                                                                                                                                                                                                                                                                                                                                                    |
| 15     | Benmarhnia T, Huang J, Basu R, Wu J, Bruckner TA. Decomposition Analysis of Black-White Disparities in Birth Outcomes: The Relative Contribution of Air Pollution and Social Factors in California. <i>Environ Health Perspect.</i> 2017; 125(10): 107003.                                                                                                                                                                                                                                                                                                                                                                                                                                                                                                                                                                                                                                                                                                                                                                                           |
| 16     | Bowe B, Xie Y, Li T, Yan Y, Xian H, Al-Aly Z. The 2016 global and national burden of diabetes mellitus attributable to PM <sub>2.5</sub> air pollution. <i>Lancet Planet Health.</i> 2018; 2(7): e301–12.                                                                                                                                                                                                                                                                                                                                                                                                                                                                                                                                                                                                                                                                                                                                                                                                                                            |
| 17     | Boy E, Bruce N, Delgado H. Birth weight and exposure to kitchen wood smoke during pregnancy in rural Guatemala. <i>Environ Health Perspect.</i> 2002; 110(1): 109–14.                                                                                                                                                                                                                                                                                                                                                                                                                                                                                                                                                                                                                                                                                                                                                                                                                                                                                |
| 18     | Brauer M, Lencar C, Tamburic L, Koehoorn M, Demers P, Karr C. A cohort study of traffic-related air pollution impacts on birth outcomes. <i>Environ Health Perspect.</i> 2008; 116(5): 680–6.                                                                                                                                                                                                                                                                                                                                                                                                                                                                                                                                                                                                                                                                                                                                                                                                                                                        |
| 19     | Broor S, Pandey RM, Ghosh M, Maitreyi RS, Lodha R, Singhal T, Kabra SK. Risk factors for severe acute lower respiratory tract infection in under-five children. <i>Indian Pediatr.</i> 2001; 1361–9.                                                                                                                                                                                                                                                                                                                                                                                                                                                                                                                                                                                                                                                                                                                                                                                                                                                 |
| 20     | Burnett RT. Cox Proportional Survival Model Hazard Ratios from Census Year to 2011 for Adults Aged 25 to 89 in CanCHEC Cohort.                                                                                                                                                                                                                                                                                                                                                                                                                                                                                                                                                                                                                                                                                                                                                                                                                                                                                                                       |
| 21     | Carey IM, Atkinson RW, Kent AJ, van Staa T, Cook DG, Anderson HR. Mortality associations with long-term exposure to outdoor air pollution in a national English cohort. <i>Am J Respir Crit Care Med.</i> 2013; 187(11): 1226–33.                                                                                                                                                                                                                                                                                                                                                                                                                                                                                                                                                                                                                                                                                                                                                                                                                    |
| 22     | Cesaroni G, Badaloni C, Gariazzo C, Stafoggia M, Sozzi R, Davoli M, Forastiere F. Long-term exposure to urban air pollution and mortality in a cohort of more than a million adults in Rome. <i>Environ Health Perspect.</i> 2013; 121(3): 324–31.                                                                                                                                                                                                                                                                                                                                                                                                                                                                                                                                                                                                                                                                                                                                                                                                   |
| 23     | Chang HH, Reich BJ, Miranda ML. A spatial time-to-event approach for estimating associations between air pollution and preterm birth. <i>J R Stat Soc Ser C Appl Stat.</i> 2013; 62(2).                                                                                                                                                                                                                                                                                                                                                                                                                                                                                                                                                                                                                                                                                                                                                                                                                                                              |
| 24     | Chen H, Burnett RT, Kwong JC, Villeneuve PJ, Goldberg MS, Brook RD, van Donkelaar A, Jerrett M, Martin RV, Brook JR, Copes R. Risk of incident diabetes in relation to long-term exposure to fine particulate matter in Ontario, Canada. <i>Environ Health Perspect.</i> 2013; 121(7): 804–10.                                                                                                                                                                                                                                                                                                                                                                                                                                                                                                                                                                                                                                                                                                                                                       |
| 25     | Chen LH, Knutsen SF, Shavlik D, Beeson WL, Petersen F, Ghamsary M, Abbey D. The association between fatal coronary heart disease and ambient particulate air pollution: Are females at greater risk?. <i>Environ Health Perspect.</i> 2005; 113(12): 1723–9.                                                                                                                                                                                                                                                                                                                                                                                                                                                                                                                                                                                                                                                                                                                                                                                         |
| 26     | Clark C, Sbihi H, Tamburic L, Brauer M, Frank LD, Davies HW. Association of Long-Term Exposure to Transportation Noise and Traffic-Related Air Pollution with the Incidence of Diabetes: A Prospective Cohort Study. <i>Environ Health Perspect.</i> 2017; 125(8): 087025.                                                                                                                                                                                                                                                                                                                                                                                                                                                                                                                                                                                                                                                                                                                                                                           |
| 27     | Clemens T, Turner S, Dibben C. Maternal exposure to ambient air pollution and fetal growth in North-East Scotland: A population-based study using routine ultrasound scans. <i>Environ Int.</i> 2017; 107: 216–26.                                                                                                                                                                                                                                                                                                                                                                                                                                                                                                                                                                                                                                                                                                                                                                                                                                   |
| 28     | Coker E, Ghosh J, Jerrett M, Gomez-Rubio V, Beckerman B, Cockburn M, Liverani S, Su J, Li A, Kile ML, Ritz B, Molitor J. Modeling spatial effects of PM <sub>2.5</sub> on term low birth weight in Los Angeles County. <i>Environ Res.</i> 2015; 142: 354–64.                                                                                                                                                                                                                                                                                                                                                                                                                                                                                                                                                                                                                                                                                                                                                                                        |

| Source | Citation                                                                                                                                                                                                                                                                                                                                                                                                                                                                                                                                                      |
|--------|---------------------------------------------------------------------------------------------------------------------------------------------------------------------------------------------------------------------------------------------------------------------------------------------------------------------------------------------------------------------------------------------------------------------------------------------------------------------------------------------------------------------------------------------------------------|
| 29     | Collings DA, Sithole SD, Martin KS. Indoor woodsmoke pollution causing lower respiratory disease in children. <i>Trop Doct.</i> 1990; 20(4): 151–5.                                                                                                                                                                                                                                                                                                                                                                                                           |
| 30     | Coogan PF, White LF, Yu J, Burnett RT, Seto E, Brook RD, Palmer JR, Rosenberg L, Jerrett M. PM2.5 and Diabetes and Hypertension Incidence in the Black Women’s Health Study. <i>Epidemiology.</i> 2016; 27(2): 202–10.                                                                                                                                                                                                                                                                                                                                        |
| 31     | Dadvand P, Ostro B, Figueras F, Foraster M, Basagaña X, Valentín A, Martínez D, Beelen R, Cirach M, Hoek G, Jerrett M, Brunekreef B, Nieuwenhuijsen MJ. Residential proximity to major roads and term low birth weight: the roles of air pollution, heat, noise, and road-adjacent trees. <i>Epidemiology.</i> 2014; 25(4): 518–25.                                                                                                                                                                                                                           |
| 32     | Darrow LA, Klein M, Strickland MJ, Mulholland JA, Tolbert PE. Ambient Air Pollution and Birth Weight in Full-Term Infants in Atlanta, 1994–2004. <i>Environ Health Perspect.</i> 2011; 119(5): 731–7.                                                                                                                                                                                                                                                                                                                                                         |
| 33     | Dennis RJ, Maldonado D, Norman S, Baena E, Martinez G. Woodsmoke exposure and risk for obstructive airways disease among women. <i>Chest.</i> 1996; 109(1): 115–9.                                                                                                                                                                                                                                                                                                                                                                                            |
| 34     | Dherani M, Pope D, Mascarenhas M, Smith KR, Weber M, Bruce N. Indoor air pollution from unprocessed solid fuel use and pneumonia risk in children aged under five years: a systematic review and meta-analysis. <i>Bull World Health Organ.</i> 2008; 86(5): 390–398C and Kossove D. and Jeena PM, Ayannusi OE, Annamalai K, Naidoo P, Coovadia HM, Guldner P. Risk factors for admission and the role of respiratory syncytial virus-specific cytotoxic T-lymphocyte responses in children with acute bronchiolitis. <i>S Afr Med J.</i> 2003; 93(4): 291–4. |
| 35     | Ebisu K, Bell ML. Airborne PM2.5 chemical components and low birth weight in the northeastern and mid-Atlantic regions of the United States. <i>Environ Health Perspect.</i> 2012; 120(12): 1746–52.                                                                                                                                                                                                                                                                                                                                                          |
| 36     | Ebisu K, Berman JD, Bell ML. Exposure to coarse particulate matter during gestation and birth weight in the U.S. <i>Environ Int.</i> 2016; 94: 519–24.                                                                                                                                                                                                                                                                                                                                                                                                        |
| 37     | Erickson AC, Ostry A, Chan LH, Arbour L. The reduction of birth weight by fine particulate matter and its modification by maternal and neighbourhood-level factors: a multilevel analysis in British Columbia, Canada. <i>Environ Health.</i> 2016; 15: 51.                                                                                                                                                                                                                                                                                                   |
| 38     | Ezzati M, Kammen DM. Indoor air pollution from biomass combustion and acute respiratory infections in Kenya: an exposure-response study. <i>Lancet.</i> 2001; 358(9282): 619–24.                                                                                                                                                                                                                                                                                                                                                                              |
| 39     | Fleischer NL, Meriandi M, van Donkelaar A, Vadillo-Ortega F, Martin RV, Betran AP, Souza JP. Outdoor air pollution, preterm birth, and low birth weight: analysis of the world health organization global survey on maternal and perinatal health. <i>Environ Health Perspect.</i> 2014; 122(4): 425–30.                                                                                                                                                                                                                                                      |
| 40     | Fonseca W, Kirkwood BR, Victora CG, Fuchs SR, Flores JA, Misago C. Risk factors for childhood pneumonia among the urban poor in Fortaleza, Brazil: a case-control study. <i>Bull World Health Organ.</i> 1996; 74(2): 199–208.                                                                                                                                                                                                                                                                                                                                |
| 41     | Galeone C, Pelucchi C, La Vecchia C, Negri E, Bosetti C, Hu J. Indoor air pollution from solid fuel use, chronic lung diseases and lung cancer in Harbin, Northeast China. <i>Eur J Cancer Prev.</i> 2008; 17(5): 473–8.                                                                                                                                                                                                                                                                                                                                      |
| 42     | Gan WQ, FitzGerald JM, Carlsten C, Sadatsafavi M, Brauer M. Associations of ambient air pollution with chronic obstructive pulmonary disease hospitalization and mortality. <i>Am J Respir Crit Care Med.</i> 2013; 187(7): 721–7.                                                                                                                                                                                                                                                                                                                            |
| 43     | Gan WQ, Koehoorn M, Davies HW, Demers PA, Tamburic L, Brauer M. Long-Term Exposure to Traffic-Related Air Pollution and the Risk of Coronary Heart Disease Hospitalization and Mortality. <i>Environ Health Perspect.</i> 2011; 119(4): 501–7.                                                                                                                                                                                                                                                                                                                |
| 44     | Geer LA, Weedon J, Bell ML. Ambient air pollution and term birth weight in Texas from 1998 to 2004. <i>J Air Waste Manag Assoc.</i> 2012; 62(11): 1285–95.                                                                                                                                                                                                                                                                                                                                                                                                    |
| 45     | Gehring U, Tamburic L, Sbihi H, Davies HW, Brauer M. Impact of Noise and Air Pollution on Pregnancy Outcomes. <i>Epidemiology.</i> 2014; 25(3): 351–8.                                                                                                                                                                                                                                                                                                                                                                                                        |
| 46     | Gehring U, Wijga AH, Fischer P, de Jongste JC, Kerkhof M, Koppelman GH, Smit HA, Brunekreef B. Traffic-related air pollution, preterm birth and term birth weight in the PIAMA birth cohort study. <i>Environ Res.</i> 2011; 111(1): 125–35.                                                                                                                                                                                                                                                                                                                  |
| 47     | Ger LP, Hsu WL, Chen KT, Chen CJ. Risk Factors of Lung Cancer by Histological Category in Taiwan. <i>Anticancer Res.</i> 1993; 13(5A): 1491–500.                                                                                                                                                                                                                                                                                                                                                                                                              |
| 48     | Gray SC, Edwards SE, Schultz BD, Miranda ML. Assessing the impact of race, social factors and air pollution on birth outcomes: a population-based study. <i>Environ Health.</i> 2014; 13(1): 4.                                                                                                                                                                                                                                                                                                                                                               |
| 49     | Gray SC, Gelfand AE, Miranda ML. Hierarchical spatial modeling of uncertainty in air pollution and birth weight study. <i>Stat Med.</i> 2011; 30(17): 2187–98.                                                                                                                                                                                                                                                                                                                                                                                                |
| 50     | Gupta D, Boffetta P, Gaborieau V, Jindal SK. Risk factors of lung cancer in Chandigarh, India. <i>Indian J Med Res.</i> 2001; 113: 142–50.                                                                                                                                                                                                                                                                                                                                                                                                                    |
| 51     | Ha S, Hu H, Roussos-Ross D, Haidong K, Roth J, Xu X. The effects of air pollution on adverse birth outcomes. <i>Environ Res.</i> 2014; 134: 198–204.                                                                                                                                                                                                                                                                                                                                                                                                          |
| 52     | Hansen AB, Ravnskjaer L, Loft S, Andersen KK, Bräuner EV, Baastrup R, Yao C, Ketzel M, Becker T, Brandt J, Hertel O, Andersen ZJ. Long-term exposure to fine particulate matter and incidence of diabetes in the Danish Nurse Cohort. <i>Environ Int.</i> 2016; 91: 243–50.                                                                                                                                                                                                                                                                                   |

| Source | Citation                                                                                                                                                                                                                                                                                                                                                                                                                                                                                                                                                                                        |
|--------|-------------------------------------------------------------------------------------------------------------------------------------------------------------------------------------------------------------------------------------------------------------------------------------------------------------------------------------------------------------------------------------------------------------------------------------------------------------------------------------------------------------------------------------------------------------------------------------------------|
| 53     | Hao H, Chang HH, Holmes HA, Mulholland JA, Klein M, Darrow LA, Strickland MJ. Air Pollution and Preterm Birth in the U.S. State of Georgia (2002-2006): Associations with Concentrations of 11 Ambient Air Pollutants Estimated by Combining Community Multiscale Air Quality Model (CMAQ) Simulations with Stationary Monitor Measurements. <i>Environ Health Perspect.</i> 2016; 124(6): 875-80.                                                                                                                                                                                              |
| 54     | Hao Y, Strosnider H, Balluz L, Qualters JR. Geographic Variation in the Association between Ambient Fine Particulate Matter (PM <sub>2.5</sub> ) and Term Low Birth Weight in the United States. <i>Environ Health Perspect.</i> 2016; 124(2): 250-5.                                                                                                                                                                                                                                                                                                                                           |
| 55     | Harris G, Thompson WD, Fitzgerald E, Wartenberg D. The association of PM <sub>2.5</sub> with full term low birth weight at different spatial scales. <i>Environ Res.</i> 2014; 134: 427-34.                                                                                                                                                                                                                                                                                                                                                                                                     |
| 56     | Hart J, Garshick E, Dockery D, Smith T, Ryan L, Laden F. Long-Term Ambient Multipollutant Exposures and Mortality. <i>Am J Respir Crit Care Med.</i> 2011; 183: 75-8.                                                                                                                                                                                                                                                                                                                                                                                                                           |
| 57     | Hart JE, Puett RC, Rexrode KM, Albert CM, Laden F. Effect Modification of Long-Term Air Pollution Exposures and the Risk of Incident Cardiovascular Disease in US Women. <i>J Am Heart Assoc.</i> 2015; 4(12).                                                                                                                                                                                                                                                                                                                                                                                  |
| 58     | Heft-Neal S, Burney J, Bendavid E, Burke M. Robust relationship between air quality and infant mortality in Africa. <i>Nature.</i> 2018; 559(7713): 2548.                                                                                                                                                                                                                                                                                                                                                                                                                                       |
| 59     | Hertz-Picciotto I, Baker RJ, Yap P-S, Dostál M, Joad JP, Lipsett M, Greenfield T, Herr CEW, Benes I, Shumway RH, Pinkerton KE, Srám R. Early childhood lower respiratory illness and air pollution. <i>Environ Health Perspect.</i> 2007; 115(10): 1510-8.                                                                                                                                                                                                                                                                                                                                      |
| 60     | Huang C, Zhang X, Qiao Z, Guan L, Peng S, Liu J, Xie R, Zheng L. A case-control study of dietary factors in patients with lung cancer. <i>Biomed Environ Sci.</i> 1992; 5(3): 257-65.                                                                                                                                                                                                                                                                                                                                                                                                           |
| 61     | Huynh M, Woodruff TJ, Parker JD, Schoendorf KC. Relationships between air pollution and preterm birth in California. <i>Paediatr Perinat Epidemiol.</i> 2006; 20(6): 454-61.                                                                                                                                                                                                                                                                                                                                                                                                                    |
| 62     | Hyder A, Lee HJ, Ebisu K, Koutrakis P, Belanger K, Bell ML. PM <sub>2.5</sub> Exposure and Birth Outcomes: Use of Satellite- and Monitor-Based Data. <i>Epidemiology.</i> 2014; 25(1): 58-67.                                                                                                                                                                                                                                                                                                                                                                                                   |
| 63     | Hystad P, Demers PA, Johnson KC, Carpiano RM, Brauer M. Long-term residential exposure to air pollution and lung cancer risk. <i>Epidemiology.</i> 2013; 24(5): 762-72.                                                                                                                                                                                                                                                                                                                                                                                                                         |
| 64     | Hystad P, Duong M, Brauer M, Larkin A, Arku R, Kurmi OP, Fan WQ, Avezum A, Azam I, Chifamba J, Dans A, du Plessis JL, Gupta R, Kumar R, Lanas F, Liu Z, Lu Y, Lopez-Jaramillo P, Mony P, Mohan V, Mohan D, Nair S, Puoane T, Rahman O, Lap AT, Wang Y, Wei L, Yeates K, Rangarajan S, Teo K, Yusuf S, on behalf of Prospective Urban and Rural Epidemiological (PURE) Study investigators. Health Effects of Household Solid Fuel Use: Findings from 11 Countries within the Prospective Urban and Rural Epidemiology Study. <i>Environ Health Perspect.</i> 2019; 127(5): 57003.               |
| 65     | Hystad P, Duong M, Brauer M, Larkin A, Arku R, Kurmi OP, Fan WQ, Avezum A, Azam I, Chifamba J, Dans A, du Plessis JL, Gupta R, Kumar R, Lanas F, Liu Z, Lu Y, Lopez-Jaramillo P, Mony P, Mohan V, Mohan D, Nair S, Puoane T, Rahman O, Lap AT, Wang Y, Wei L, Yeates K, Rangarajan S, Teo K, Yusuf S, on behalf of Prospective Urban and Rural Epidemiological (PURE) Study investigators. Health Effects of Household Solid Fuel Use: Findings from 11 Countries within the Prospective Urban and Rural Epidemiology Study [Unpublished]. <i>Environ Health Perspect.</i> 2019; 127(5): 57003. |
| 66     | Hystad P, Larkin A, Rangarajan S, PURE country investigators, Yusuf S, Brauer M. Outdoor fine particulate matter air pollution and cardiovascular disease: Results from 747 communities across 21 countries in the PURE Study [Unpublished].                                                                                                                                                                                                                                                                                                                                                    |
| 67     | Jedrychowski W, Perera F, Mrozek-Budzyn D, Mroz E, Flak E, Spengler JD, Edwards S, Jacek R, Kaim I, Skolicki Z. Gender differences in fetal growth of newborns exposed prenatally to airborne fine particulate matter. <i>Environ Res.</i> 2009; 109(4): 447-56.                                                                                                                                                                                                                                                                                                                                |
| 68     | Jin C, Rossignol AM. Effects of passive smoking on respiratory illness from birth to age eighteen months, in Shanghai, People's Republic of China. <i>J Pediatr.</i> 1993; 123(4): 553-8.                                                                                                                                                                                                                                                                                                                                                                                                       |
| 69     | Johnson AW, Aderale WI. The association of household pollutants and socio-economic risk factors with the short-term outcome of acute lower respiratory infections in hospitalized pre-school Nigerian children. <i>Ann Trop Paediatr.</i> 1992; 12(4): 421-32.                                                                                                                                                                                                                                                                                                                                  |
| 70     | Karr C, Lumley T, Schreuder A, Davis R, Larson T, Ritz B, Kaufman J. Effects of subchronic and chronic exposure to ambient air pollutants on infant bronchiolitis. <i>Am J Epidemiol.</i> 2007; 165(5): 553-60.                                                                                                                                                                                                                                                                                                                                                                                 |
| 71     | Karr CJ, Rudra CB, Miller KA, Gould TR, Larson T, Sathyanarayana S, Koenig JQ. Infant exposure to fine particulate matter and traffic and risk of hospitalization for RSV bronchiolitis in a region with lower ambient air pollution. <i>Environ Res.</i> 2009; 109(3): 321-7.                                                                                                                                                                                                                                                                                                                  |
| 72     | Katanoda K, Sobue T, Satoh H, Tajima K, Suzuki T, Nakatsuka H, Takezaki T, Nakayama T, Nitta H, Tanabe K, Tominaga S. An association between long-term exposure to ambient air pollution and mortality from lung cancer and respiratory diseases in Japan. <i>J Epidemiol.</i> 2011; 21(2): 132-43.                                                                                                                                                                                                                                                                                             |
| 73     | Kim C, Seow WJ, Shu X-O, Bassig BA, Rothman N, Chen BE, Xiang Y-B, Hosgood HD, Ji B-T, Hu W, Wen C, Chow W-H, Cai Q, Yang G, Gao Y-T, Zheng W, Lan Q. Cooking Coal Use and All-Cause and Cause-Specific Mortality in a Prospective Cohort Study of Women in Shanghai, China. <i>Environ Health Perspect.</i> 2016; 124(9): 1384-9.                                                                                                                                                                                                                                                              |

| Source | Citation                                                                                                                                                                                                                                                                                                                                                                                                                                                                                                                                                                                                            |
|--------|---------------------------------------------------------------------------------------------------------------------------------------------------------------------------------------------------------------------------------------------------------------------------------------------------------------------------------------------------------------------------------------------------------------------------------------------------------------------------------------------------------------------------------------------------------------------------------------------------------------------|
| 74     | Kleinerman RA, Wang Z, Wang L, Metayer C, Zhang S, Brenner AV, Zhang S, Xia Y, Shang B, Lubin JH. Lung cancer and indoor exposure to coal and biomass in rural China. <i>J Occup Environ Med.</i> 2002; 44(4): 338–44.                                                                                                                                                                                                                                                                                                                                                                                              |
| 75     | Kloog I, Melly SJ, Ridgway WL, Coull BA, Schwartz J. Using new satellite based exposure methods to study the association between pregnancy pm2.5 exposure, premature birth and birth weight in Massachusetts. <i>Environ Health.</i> 2012; 11(1).                                                                                                                                                                                                                                                                                                                                                                   |
| 76     | Ko YC, Lee CH, Chen MJ, Huang CC, Chang WY, Lin HJ, Wang HZ, Chang PY. Risk factors for primary lung cancer among non-smoking women in Taiwan. <i>Int J Epidemiol.</i> 1997; 26(1): 24-31.                                                                                                                                                                                                                                                                                                                                                                                                                          |
| 77     | Kumar N. Uncertainty in the relationship between criteria pollutants and low birth weight in Chicago. <i>Atmos Environ.</i> 2012; 49: 171–9.                                                                                                                                                                                                                                                                                                                                                                                                                                                                        |
| 78     | Kumar S, Awasthi S, Jain A, Srivastava RC. Blood zinc levels in children hospitalized with severe pneumonia: a case control study. <i>Indian Pediatr.</i> 2004; 41(5): 486–91.                                                                                                                                                                                                                                                                                                                                                                                                                                      |
| 79     | Lan Q, He X, Shen M, Tian L, Liu LZ, Lai H, Chen W, Berndt SI, Hosgood HD, Lee K-M, Zheng T, Blair A, Chapman RS. Variation in lung cancer risk by smoky coal subtype in Xuanwei, China. <i>Int J Cancer.</i> 2008; 123(9): 2164–9.                                                                                                                                                                                                                                                                                                                                                                                 |
| 80     | Laurent O, Hu J, Li L, Cockburn M, Escobedo L, Kleeman MJ, Wu J. Sources and contents of air pollution affecting term low birth weight in Los Angeles County, California, 2001-2008. <i>Environ Res.</i> 2014; 134: 488-95.                                                                                                                                                                                                                                                                                                                                                                                         |
| 81     | Laurent O, Hu J, Li L, Kleeman MJ, Bartell SM, Cockburn M, Escobedo L, Wu J. A Statewide Nested Case-Control Study of Preterm Birth and Air Pollution by Source and Composition: California, 2001-2008. <i>Environ Health Perspect.</i> 2016; 124(9): 1479-86.                                                                                                                                                                                                                                                                                                                                                      |
| 82     | Laurent O, Hu J, Li L, Kleeman MJ, Bartell SM, Cockburn M, Escobedo L, Wu J. Low birth weight and air pollution in California: Which sources and components drive the risk?. <i>Environ Int.</i> 2016; 92-93: 471-7.                                                                                                                                                                                                                                                                                                                                                                                                |
| 83     | Laurent O, Wu J, Li L, Chung J, Bartell S. Investigating the association between birth weight and complementary air pollution metrics: a cohort study. <i>Environ Health.</i> 2013; 12(1).                                                                                                                                                                                                                                                                                                                                                                                                                          |
| 84     | Lavigne E, Yasseen AS 3rd, Stieb DM, Hystad P, van Donkelaar A, Martin RV, Brook JR, Crouse DL, Burnett RT, Chen H, Weichenthal S, Johnson M, Villeneuve PJ, Walker M. Ambient air pollution and adverse birth outcomes: Differences by maternal comorbidities. <i>Environ Res.</i> 2016; 148: 457-466.                                                                                                                                                                                                                                                                                                             |
| 85     | Le CH, Ko YC, Cheng LS, Lin YC, Lin HJ, Huang MS, Huang JJ, Kao EL, Wang HZ. The heterogeneity in risk factors of lung cancer and the difference of histologic distribution between genders in Taiwan. <i>Cancer Causes Control.</i> 2001; 12(4): 289–300.                                                                                                                                                                                                                                                                                                                                                          |
| 86     | Lepeule J, Laden F, Dockery D, Schwartz J. Chronic exposure to fine particles and mortality: an extended follow-up of the Harvard Six Cities study from 1974 to 2009 - Unpublished data. <i>Environ Health Perspect.</i> 2012; 120(7): 965-70.                                                                                                                                                                                                                                                                                                                                                                      |
| 87     | Lepeule J, Laden F, Dockery D, Schwartz J. Chronic exposure to fine particles and mortality: an extended follow-up of the Harvard Six Cities study from 1974 to 2009. <i>Environ Health Perspect.</i> 2012; 120(7): 965-70.                                                                                                                                                                                                                                                                                                                                                                                         |
| 88     | Lim CC, Hayes RB, Ahn J, Shao Y, Silverman DT, Jones RR, Garcia C, Thurston GD. Association between long-term exposure to ambient air pollution and diabetes mortality in the US. <i>Environ Res.</i> 2018; 165: 330-36                                                                                                                                                                                                                                                                                                                                                                                             |
| 89     | Lipsett MJ, Ostro BD, Reynolds P, Goldberg D, Hertz A, Jerrett M, Smith DF, Garcia C, Chang ET, Bernstein L. Long-term exposure to air pollution and cardiorespiratory disease in the California teachers study cohort [Unpublished data]. <i>Am J Respir Crit Care Med.</i> 2011; 184(7): 828-35.                                                                                                                                                                                                                                                                                                                  |
| 90     | Lipsett MJ, Ostro BD, Reynolds P, Goldberg D, Hertz A, Jerrett M, Smith DF, Garcia C, Chang ET, Bernstein L. Long-term exposure to air pollution and cardiorespiratory disease in the California teachers study cohort. <i>Am J Respir Crit Care Med.</i> 2011; 184(7): 828-35.                                                                                                                                                                                                                                                                                                                                     |
| 91     | Lissowska J, Bardin-Mikolajczak A, Fletcher T, Zaridze D, Szeszenia-Dabrowska N, Rudnai P, Fabianova E, Cassidy A, Mates D, Holcatova I, Vitova V, Janout V, Mannetje A, Brennan P, Boffetta P. Lung cancer and indoor pollution from heating and cooking with solid fuels: the IARC international multicentre case-control study in Eastern/Central Europe and the United Kingdom. <i>Am J Epidemiol.</i> 2005; 162(4): 326–33.                                                                                                                                                                                    |
| 92     | Luo RX, Wu B, Yi YN, Huang ZW, Lin RT. Indoor burning coal air pollution and lung cancer--a case-control study in Fuzhou, China. <i>Lung Cancer.</i> 1996; 14 Suppl 1: S113-119.                                                                                                                                                                                                                                                                                                                                                                                                                                    |
| 93     | MacIntyre EA, Gehring U, Mölter A, Fuertes E, Klümper C, Krämer U, Quass U, Hoffmann B, Gascon M, Brunekreef B, Koppelman GH, Beelen R, Hoek G, Birk M, de Jongste JC, Smit HA, Cyrys J, Gruzieva O, Korek M, Bergström A, Agius RM, de Vocht F, Simpson A, Porta D, Forastiere F, Badaloni C, Cesaroni G, Esplugues A, Fernández-Somoano A, Lerxundi A, Sunyer J, Cirach M, Nieuwenhuijsen MJ, Pershagen G, Heinrich J. Air Pollution and Respiratory Infections during Early Childhood: An Analysis of 10 European Birth Cohorts within the ESCAPE Project. <i>Environ Health Perspect.</i> 2014; 122(1): 107–13. |
| 94     | Mahalanabis D, Gupta S, Paul D, Gupta A, Lahiri M, Khaled MA. Risk factors for pneumonia in infants and young children and the role of solid fuel for cooking: a case-control study. <i>Epidemiol Infect.</i> 2002; 129(1): 65–71.                                                                                                                                                                                                                                                                                                                                                                                  |
| 95     | Miller KA, Siscovick DS, Sheppard L, Shepherd K, Sullivan JH, Anderson GL, Kaufman JD. Long-term exposure to air pollution and incidence of cardiovascular events in women. <i>N Engl J Med.</i> 2007; 356(5): 447-58.                                                                                                                                                                                                                                                                                                                                                                                              |
| 96     | Morello-Frosch R, Jesdale BM, Sadd JL, Pastor M. Ambient air pollution exposure and full-term birth weight in California. <i>Environ Health.</i> 2010; 9(1).                                                                                                                                                                                                                                                                                                                                                                                                                                                        |

| Source | Citation                                                                                                                                                                                                                                                                                                                                                                                                                                                                                                                                                                                                                                                                                                                                                                                                                                                                                                                         |
|--------|----------------------------------------------------------------------------------------------------------------------------------------------------------------------------------------------------------------------------------------------------------------------------------------------------------------------------------------------------------------------------------------------------------------------------------------------------------------------------------------------------------------------------------------------------------------------------------------------------------------------------------------------------------------------------------------------------------------------------------------------------------------------------------------------------------------------------------------------------------------------------------------------------------------------------------|
| 97     | Naess Ø, Nafstad P, Aamodt G, Clausen B, Rosland P. Relation between concentration of air pollution and cause-specific mortality: four-year exposures to nitrogen dioxide and particulate matter pollutants in 470 neighborhoods in Oslo, Norway. <i>Am J Epidemiol.</i> 2007; 165(4): 435-43.                                                                                                                                                                                                                                                                                                                                                                                                                                                                                                                                                                                                                                   |
| 98     | Park SK, Adar SD, O'Neill MS, Auchincloss AH, Szpiro A, Bertoni AG, Navas-Acien A, Kaufman JD, Diez-Roux AV. Long-term exposure to air pollution and type 2 diabetes mellitus in a multiethnic cohort. <i>Am J Epidemiol.</i> 2015; 181(5): 327-36.                                                                                                                                                                                                                                                                                                                                                                                                                                                                                                                                                                                                                                                                              |
| 99     | Parker JD, Kravets N, Vaidyanathan A. Particulate Matter Air Pollution Exposure and Heart Disease Mortality Risks by Race and Ethnicity in the United States. <i>Circulation.</i> 2018; 137(16): 1688-97.                                                                                                                                                                                                                                                                                                                                                                                                                                                                                                                                                                                                                                                                                                                        |
| 100    | Parker JD, Woodruff TJ, Basu R, Schoendorf KC. Air Pollution and Birth Weight Among Term Infants in California. <i>Pediatrics.</i> 2005; 115(1): 121-8.                                                                                                                                                                                                                                                                                                                                                                                                                                                                                                                                                                                                                                                                                                                                                                          |
| 101    | Parker JD, Woodruff TJ. Influences of study design and location on the relationship between particulate matter air pollution and birthweight. <i>Paediatr Perinat Epidemiol.</i> 2008; 22(3): 214-27.                                                                                                                                                                                                                                                                                                                                                                                                                                                                                                                                                                                                                                                                                                                            |
| 102    | Pereira G, Belanger K, Ebisu K, Bell ML. Fine particulate matter and risk of preterm birth in Connecticut in 2000-2006: a longitudinal study. <i>Am J Epidemiol.</i> 2014; 179(1): 67-74.                                                                                                                                                                                                                                                                                                                                                                                                                                                                                                                                                                                                                                                                                                                                        |
| 103    | Pereira G, Bell ML, Belanger K, de Klerk N. Fine particulate matter and risk of preterm birth and pre-labor rupture of membranes in Perth, Western Australia 1997-2007: a longitudinal study. <i>Environ Int.</i> 2014; 73: 143-9.                                                                                                                                                                                                                                                                                                                                                                                                                                                                                                                                                                                                                                                                                               |
| 104    | Pinault L, Tjepkema M, Crouse DL, Weichenthal S, van Donkelaar A, Martin RV, Brauer M, Chen H, Burnett RT. Risk estimates of mortality attributed to low concentrations of ambient fine particulate matter in the Canadian community health survey cohort [Unpublished]. <i>Environ Health.</i> 2016; 15: 18.                                                                                                                                                                                                                                                                                                                                                                                                                                                                                                                                                                                                                    |
| 105    | Pinault L, Tjepkema M, Crouse DL, Weichenthal S, van Donkelaar A, Martin RV, Brauer M, Chen H, Burnett RT. Risk estimates of mortality attributed to low concentrations of ambient fine particulate matter in the Canadian community health survey cohort. <i>Environ Health.</i> 2016; 15(1): 18.                                                                                                                                                                                                                                                                                                                                                                                                                                                                                                                                                                                                                               |
| 106    | Puett RC, Hart JE, Schwartz J, Hu FB, Liese AD, Laden F. Are particulate matter exposures associated with risk of type 2 diabetes? <i>Environ Health Perspect.</i> 2011; 119(3): 384-9.                                                                                                                                                                                                                                                                                                                                                                                                                                                                                                                                                                                                                                                                                                                                          |
| 107    | Puett RC, Hart JE, Suh H, Mittleman M, Laden F. Particulate matter exposures, mortality, and cardiovascular disease in the health professionals follow-up study. <i>Environ Health Perspect.</i> 2011; 119(8): 1130-5.                                                                                                                                                                                                                                                                                                                                                                                                                                                                                                                                                                                                                                                                                                           |
| 108    | Puett RC, Hart JE, Yanosky JD, Paciorek C, Schwartz J, Suh H, Speizer FE, Laden F. Chronic fine and coarse particulate exposure, mortality, and coronary heart disease in the Nurses' Health Study. <i>Environ Health Perspect.</i> 2009; 117(11): 1697-701.                                                                                                                                                                                                                                                                                                                                                                                                                                                                                                                                                                                                                                                                     |
| 109    | Qian Z, Liang S, Yang S, Trevathan E, Huang Z, Yang R, Wang J, Hu K, Zhang Y, Vaughn M, Shen L, Liu W, Li P, Ward P, Yang L, Zhang W, Chen W, Dong G, Zheng T, Xu S, Zhang B. Ambient air pollution and preterm birth: A prospective birth cohort study in Wuhan, China. <i>Int J Hyg Environ Health.</i> 2016; 219(2): 195-203.                                                                                                                                                                                                                                                                                                                                                                                                                                                                                                                                                                                                 |
| 110    | Qiu H, Schooling CM, Sun S, Tsang H, Yang Y, Lee RS, Wong CM, Tian L. Long-term exposure to fine particulate matter air pollution and type 2 diabetes mellitus in elderly: A cohort study in Hong Kong. <i>Environ Int.</i> 2018; 113: 350-56.                                                                                                                                                                                                                                                                                                                                                                                                                                                                                                                                                                                                                                                                                   |
| 111    | Raaschou-Nielsen O, Andersen ZJ, Beelen R, Samoli E, Stafoggia M, Weinmayr G, Hoffmann B, Fischer P, Nieuwenhuijsen MJ, Brunekreef B, Xun WW, Katsouyanni K, Dimakopoulou K, Sommar J, Forsberg B, Modig L, Oudin A, Oftedal B, Schwarze PE, Nafstad P, De Faire U, Pedersen NL, Ostenson C-G, Fratiglioni L, Penell J, Korek M, Pershagen G, Eriksen KT, Sørensen M, Tjønneland A, Ellermann T, Eeftens M, Peeters PH, Meliefste K, Wang M, Bueno-de-Mesquita B, Key TJ, de Hoogh K, Concin H, Nagel G, Vilier A, Grioni S, Krogh V, Tsai M-Y, Ricceri F, Sacerdote C, Galassi C, Migliore E, Ranzi A, Cesaroni G, Badaloni C, Forastiere F, Tamayo I, Amiano P, Dorronsoro M, Trichopoulou A, Bamia C, Vineis P, Hoek G. Air pollution and lung cancer incidence in 17 European cohorts: prospective analyses from the European Study of Cohorts for Air Pollution Effects (ESCAPE). <i>Lancet Oncol.</i> 2013; 14(9): 813-22. |
| 112    | Robin LF, Less PS, Winget M, Steinhoff M, Moulton LH, Santosham M, Correa A. Wood-burning stoves and lower respiratory illnesses in Navajo children. <i>Pediatr Infect Dis J.</i> 1996; 15(10): 859-65.                                                                                                                                                                                                                                                                                                                                                                                                                                                                                                                                                                                                                                                                                                                          |
| 113    | Sapkota A, Gajalakshmi V, Jetly DH, Roychowdhury S, Dikshit RP, Brennan P, Hashibe M, Boffetta P. Indoor air pollution from solid fuels and risk of hypopharyngeal/laryngeal and lung cancers: a multicentric case-control study from India. <i>Int J Epidemiol.</i> 2008; 37(2): 321-8.                                                                                                                                                                                                                                                                                                                                                                                                                                                                                                                                                                                                                                         |
| 114    | Sasco AJ, Merrill RM, Dari I, Benhaïm-Luzon V, Carriot F, Cann CI, Barta M. A case-control study of lung cancer in Casablanca, Morocco. <i>Cancer Causes Control.</i> 2002; 13(7): 609-16.                                                                                                                                                                                                                                                                                                                                                                                                                                                                                                                                                                                                                                                                                                                                       |
| 115    | Savitha MR, Nandeeshwara SB, Pradeep Kumar MJ, ul-Haque F, Raju CK. Modifiable risk factors for acute lower respiratory tract infections. <i>Indian J Pediatr.</i> 2007; 74(5): 477-82.                                                                                                                                                                                                                                                                                                                                                                                                                                                                                                                                                                                                                                                                                                                                          |
| 116    | Savitz DA, Bobb JF, Carr JL, Clougherty JE, Dominici F, Elston B, Ito K, Ross Z, Yee M, Matte TD. Ambient Fine Particulate Matter, Nitrogen Dioxide, and Term Birth Weight in New York, New York. <i>Am J Epidemiol.</i> 2014; 179(4): 457-66.                                                                                                                                                                                                                                                                                                                                                                                                                                                                                                                                                                                                                                                                                   |
| 117    | Sezer H, Akkurt I, Guler N, Marakoğlu K, Berk S. A case-control study on the effect of exposure to different substances on the development of COPD. <i>Ann Epidemiol.</i> 2006; 16(1): 59-62.                                                                                                                                                                                                                                                                                                                                                                                                                                                                                                                                                                                                                                                                                                                                    |
| 118    | Shah N, Ramankutty V, Premila PG, Sathy N. Risk factors for severe pneumonia in children in south Kerala: a hospital-based case-control study. <i>J Trop Pediatr.</i> 1994; 40(4): 201-6.                                                                                                                                                                                                                                                                                                                                                                                                                                                                                                                                                                                                                                                                                                                                        |

| Source | Citation                                                                                                                                                                                                                                                                                                                                                                                                                                                                                                                                                                                                                                                                                                                                                       |
|--------|----------------------------------------------------------------------------------------------------------------------------------------------------------------------------------------------------------------------------------------------------------------------------------------------------------------------------------------------------------------------------------------------------------------------------------------------------------------------------------------------------------------------------------------------------------------------------------------------------------------------------------------------------------------------------------------------------------------------------------------------------------------|
| 119    | Shen M, Chapman RS, Vermeulen R, Tian L, Zheng T, Chen BE, Engels EA, He X, Blair A, Lan Q. Coal use, stove improvement, and adult pneumonia mortality in Xuanwei, China: a retrospective cohort study. <i>Environ Health Perspect.</i> 2009; 117(2): 261–6.                                                                                                                                                                                                                                                                                                                                                                                                                                                                                                   |
| 120    | Siddiqui AR, Gold EB, Yang X, Lee K, Brown KH, Bhutta ZA. Prenatal exposure to wood fuel smoke and low birth weight. <i>Environ Health Perspect.</i> 2008; 116(4): 543-9.                                                                                                                                                                                                                                                                                                                                                                                                                                                                                                                                                                                      |
| 121    | Smith KR, McCracken JP, Weber MW, Hubbard A, Jenny A, Thompson LM, Balmes J, Diaz A, Arana B, Bruce N. Effect of reduction in household air pollution on childhood pneumonia in Guatemala (RESPIRE): a randomised controlled trial. <i>Lancet.</i> 2011; 378(9804): 1717-26.                                                                                                                                                                                                                                                                                                                                                                                                                                                                                   |
| 122    | Smith RB, Fecht D, Gulliver J, Beevers SD, Dajnak D, Blangiardo M, Ghosh RE, Hansell AL, Kelly FJ, Anderson HR, Toledano MB. Impact of London's road traffic air and noise pollution on birth weight: retrospective population based cohort study. <i>BMJ.</i> 2017; 359: j5299.                                                                                                                                                                                                                                                                                                                                                                                                                                                                               |
| 123    | Stafoggia M, Cesaroni G, Peters A, Andersen ZJ, Badaloni C, Beelen R, Caracciolo B, Cyrus J, de Faire U, de Hoogh K, Eriksen KT, Fratiglioni L, Galassi C, Gigante B, Havulinna AS, Hennig F, Hilding A, Hoek G, Hoffmann B, Houthuijs D, Korek M, Lanki T, Leander K, Magnusson PK, Meisinger C, Migliore E, Overvad K, Ostenson C-G, Pedersen NL, Pekkanen J, Penell J, Pershagen G, Pundt N, Pyko A, Raaschou-Nielsen O, Ranzi A, Ricceri F, Sacerdote C, Swart WJR, Turunen AW, Vineis P, Weimar C, Weinmayr G, Wolf K, Brunekreef B, Forastiere F. Long-term exposure to ambient air pollution and incidence of cerebrovascular events: results from 11 European cohorts within the ESCAPE project. <i>Environ Health Perspect.</i> 2014; 122(9): 919–25. |
| 124    | Stieb DM, Chen L, Beckerman BS, Jerrett M, Crouse DL, Omariba DW, Peters PA, van Donkelaar A, Martin RV, Burnett RT, Gilbert NL, Tjepkema M, Liu S, Dugandzic RM. Associations of Pregnancy Outcomes and PM2.5 in a National Canadian Study. <i>Environ Health Perspect.</i> 2016; 124(2): 243-9.                                                                                                                                                                                                                                                                                                                                                                                                                                                              |
| 125    | Thompson LM, Bruce N, Eskenazi B, Diaz A, Pope D, Smith KR. Impact of reduced maternal exposures to wood smoke from an introduced chimney stove on newborn birth weight in rural Guatemala. <i>Environ Health Perspect.</i> 2011; 119(10): 1489-94.                                                                                                                                                                                                                                                                                                                                                                                                                                                                                                            |
| 126    | Thurston GD, Ahn J, Cromar KR, Shao Y, Reynolds HR, Jerrett M, Lim CC, Shanley R, Park Y, Hayes RB. Ambient Particulate Matter Air Pollution Exposure and Mortality in the NIH-AARP Diet and Health Cohort [Unpublished]. <i>Environ Health Perspect.</i> 2016; 124(4): 484-90.                                                                                                                                                                                                                                                                                                                                                                                                                                                                                |
| 127    | Tielsch JM, Katz J, Thulasiraj RD, Coles CL, Sheeladevi S, Yanik EL, Rahmathullah L. Exposure to indoor biomass fuel and tobacco smoke and risk of adverse reproductive outcomes, mortality, respiratory morbidity and growth among newborn infants in south India. <i>Int J Epidemiol.</i> 2009; 38(5): 1351-63.                                                                                                                                                                                                                                                                                                                                                                                                                                              |
| 128    | To T, Zhu J, Villeneuve PJ, Simatovic J, Feldman L, Gao C, Williams D, Chen H, Weichenthal S, Wall C, Miller AB. Chronic disease prevalence in women and air pollution--A 30-year longitudinal cohort study. <i>Environ Int.</i> 2015; 80: 26–32.                                                                                                                                                                                                                                                                                                                                                                                                                                                                                                              |
| 129    | Tseng E, Ho W-C, Lin M-H, Cheng T-J, Chen P-C, Lin H-H. Chronic exposure to particulate matter and risk of cardiovascular mortality: cohort study from Taiwan. <i>BMC Public Health.</i> 2015; 15: 936.                                                                                                                                                                                                                                                                                                                                                                                                                                                                                                                                                        |
| 130    | Turner MC, Jerrett M, Pope CA 3rd, Krewski D, Gapstur SM, Diver WR, Beckerman BS, Marshall JD, Su J, Crouse DL, Burnett RT. Long-term ozone exposure and mortality in a large prospective study. <i>Am J Respir Crit Care Med.</i> 2016; 193(10): 1134-42.                                                                                                                                                                                                                                                                                                                                                                                                                                                                                                     |
| 131    | Victoria CG, Fuchs SC, Flores JA, Fonseca W, Kirkwood B. Risk factors for pneumonia among children in a Brazilian metropolitan area. <i>Pediatrics.</i> 1994; 977-85.                                                                                                                                                                                                                                                                                                                                                                                                                                                                                                                                                                                          |
| 132    | Villeneuve PJ, Weichenthal SA, Crouse D, Miller AB, To T, Martin RV, van Donkelaar A, Wall C, Burnett RT. Long-term exposure to fine particulate matter air pollution and mortality among Canadian women. <i>Epidemiology.</i> 2015; 26(4): 536-45.                                                                                                                                                                                                                                                                                                                                                                                                                                                                                                            |
| 133    | Wayse V, Yousafzai A, Mogale K, Filteau S. Association of subclinical vitamin D deficiency with severe acute lower respiratory infection in Indian children under 5 y. <i>Eur J Clin Nutr.</i> 2004; 58(4): 563–7.                                                                                                                                                                                                                                                                                                                                                                                                                                                                                                                                             |
| 134    | Weichenthal S, Villeneuve PJ, Burnett RT, van Donkelaar A, Martin RV, Jones RR, DellaValle CT, Sandler DP, Ward MH, Hoppin JA. Long-term exposure to fine particulate matter: association with nonaccidental and cardiovascular mortality in the agricultural health study cohort. <i>Environ Health Perspect.</i> 2014; 122(6): 609-15.                                                                                                                                                                                                                                                                                                                                                                                                                       |
| 135    | Weinmayr G, Hennig F, Fuks K, Nonnemacher M, Jakobs H, Möhlenkamp S, Erbel R, Jöckel K-H, Hoffmann B, Moebus S, Heinz Nixdorf Recall Investigator Group. Long-term exposure to fine particulate matter and incidence of type 2 diabetes mellitus in a cohort study: effects of total and traffic-specific air pollution. <i>Environ Health.</i> 2015; 14: 53.                                                                                                                                                                                                                                                                                                                                                                                                  |
| 136    | Wesley AG, Loening WE. Assessment and 2-year follow-up of some factors associated with severity of respiratory infections in early childhood. <i>S Afr Med J.</i> 1996; 86(4): 365–8.                                                                                                                                                                                                                                                                                                                                                                                                                                                                                                                                                                          |
| 137    | Wilhelm M, Ghosh JK, Su J, Cockburn M, Jerrett M, Ritz B. Traffic-related air toxics and preterm birth: a population-based case-control study in Los Angeles County, California. <i>Environ Health.</i> 2011; 10: 89.                                                                                                                                                                                                                                                                                                                                                                                                                                                                                                                                          |
| 138    | Wong CM, Lai HK, Tsang H, Thach TQ, Thomas GN, Lam KBH, Chan KP, Yang L, Lau AKH, Ayres JG, Lee SY, Man Chan W, Hedley AJ, Lam TH. Satellite-Based Estimates of Long-Term Exposure to Fine Particles and Association with Mortality in Elderly Hong Kong Residents. <i>Environ Health Perspect.</i> 2015; 123(11): 1167-72.                                                                                                                                                                                                                                                                                                                                                                                                                                    |

| Source | Citation                                                                                                                                                                                                                                                                                             |
|--------|------------------------------------------------------------------------------------------------------------------------------------------------------------------------------------------------------------------------------------------------------------------------------------------------------|
| 139    | Wu AH, Henderson BE, Pike MC, Yu MC. Smoking and other risk factors for lung cancer in women. <i>J Natl Cancer Inst.</i> 1985; 74(4): 747-51.                                                                                                                                                        |
| 140    | Wu J, Wilhelm M, Chung J, Ritz B. Comparing exposure assessment methods for traffic-related air pollution in an adverse pregnancy outcome study. <i>Environ Res.</i> 2011; 111(5): 685-92.                                                                                                           |
| 141    | Wylie BJ, Coull BA, Hamer DH, Singh MP, Jack D, Yeboah-Antwi K, Sabin L, Singh N, MacLeod WB. Impact of biomass fuels on pregnancy outcomes in central East India. <i>Environ Health.</i> 2014; 13(1): 1.                                                                                            |
| 142    | Wylie BJ, Kishashu Y, Matechi E, Zhou Z, Coull B, Abioye AI, Dionisio KL, Mugusi F, Premji Z, Fawzi W, Hauser R, Ezzati M. Maternal exposure to carbon monoxide and fine particulate matter during pregnancy in an urban Tanzanian cohort. <i>Indoor Air.</i> 2017; 27(1): 136-146.                  |
| 143    | Yin P, Brauer M, Cohen A, Burnett RT, Liu J, Liu Y, Liang R, Wang W, Qi J, Wang L, Zhou M. Long-term Fine Particulate Matter Exposure and Nonaccidental and Cause-specific Mortality in a Large National Cohort of Chinese Men [Unpublished]. <i>Environ Health Perspect.</i> 2017; 125(11): 117002. |
| 144    | Yin P, Brauer M, Cohen A, Burnett RT, Liu J, Liu Y, Liang R, Wang W, Qi J, Wang L, Zhou M. Long-term Fine Particulate Matter Exposure and Nonaccidental and Cause-specific Mortality in a Large National Cohort of Chinese Men. <i>Environ Health Perspect.</i> 2017; 125(11): 117002.               |
| 145    | Yu K, Qiu G, Chan K-H, Lam K-BH, Kurmi OP, Bennett DA, Yu C, Pan A, Lv J, Guo Y, Bian Z, Yang L, Chen Y, Hu FB, Chen Z, Li L, Wu T. Association of Solid Fuel Use With Risk of Cardiovascular and All-Cause Mortality in Rural China. <i>JAMA.</i> 2018; 319(13): 1351–61.                           |
| 146    | Yucra S, Tapia V, Steenland K, Naeher LP, Gonzales GF. Association between biofuel exposure and adverse birth outcomes at high altitudes in Peru: a matched case-control study. <i>Int J Occup Environ Health.</i> 2011; 17(4): 307-13.                                                              |

The following figures display risk curves for each outcome. The dashed line depicts the GBD 2017 IER including active smoking data, the dotted line depicts the GBD 2019 IER including active smoking data and updates to the AS and SHS exposure incorporation, and the solid line depicts the GBD 2019 MR-BRT curve without the inclusion of active smoking data. The grey shaded areas represent the 95% CI. The red box represents the TMREL area of the curve. On each page, the first figure depicts the typical range of outdoor exposure, whereas the second plot includes higher levels typical of household air pollution exposure.

Each point or number represents one study effect size. Each is plotted at the 95<sup>th</sup> percentile of the exposure distribution (OAP), the expected level of exposure for individual using solid fuel (HAP), or the expected level of exposure for individuals experiencing SHS. The relative risk is plotted relative to the predicted relative risk at the fifth percentile of exposure distribution (OAP), the expected (ambient only) level of exposure for individuals not using solid fuel (HAP), or the expected (ambient only) level of exposure for individuals not exposed to SHS. For example, a study predicting a relative risk of 1.5 for an exposure range of 10 to 20 would be plotted at (20, MRBRT(10)\*1.5). Arrows represent studies that would have been outside the range of the plot but have been moved to include on the figure.

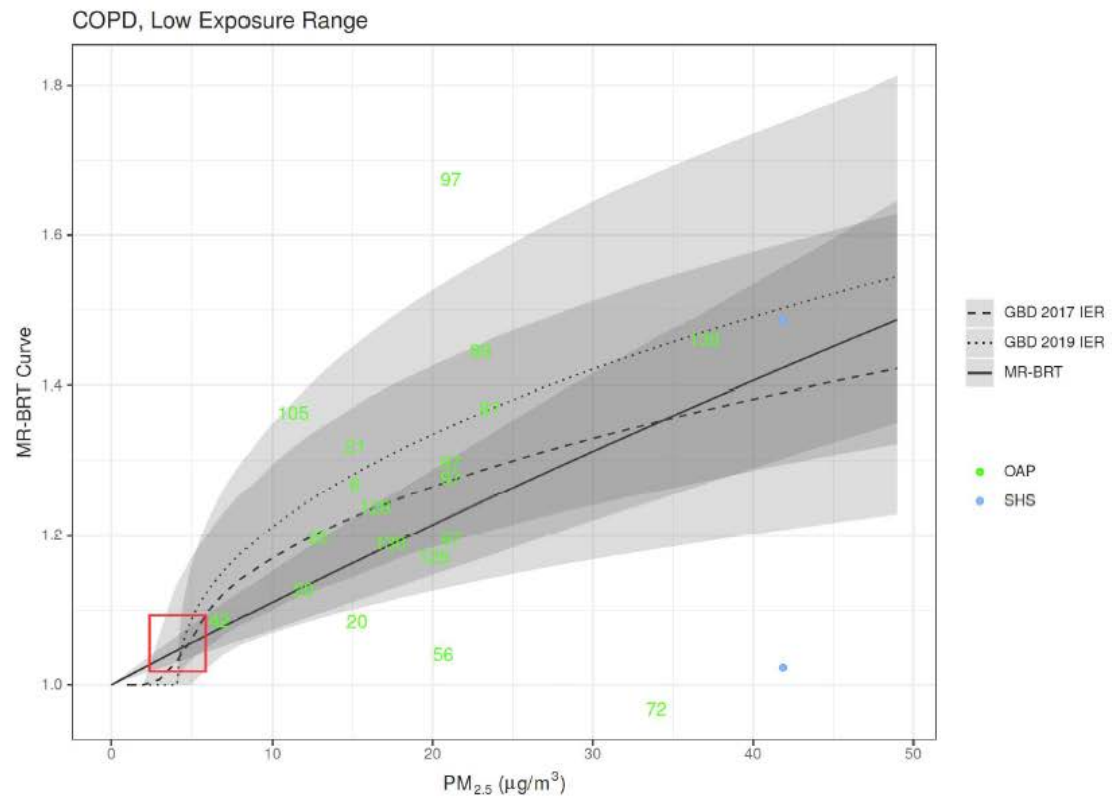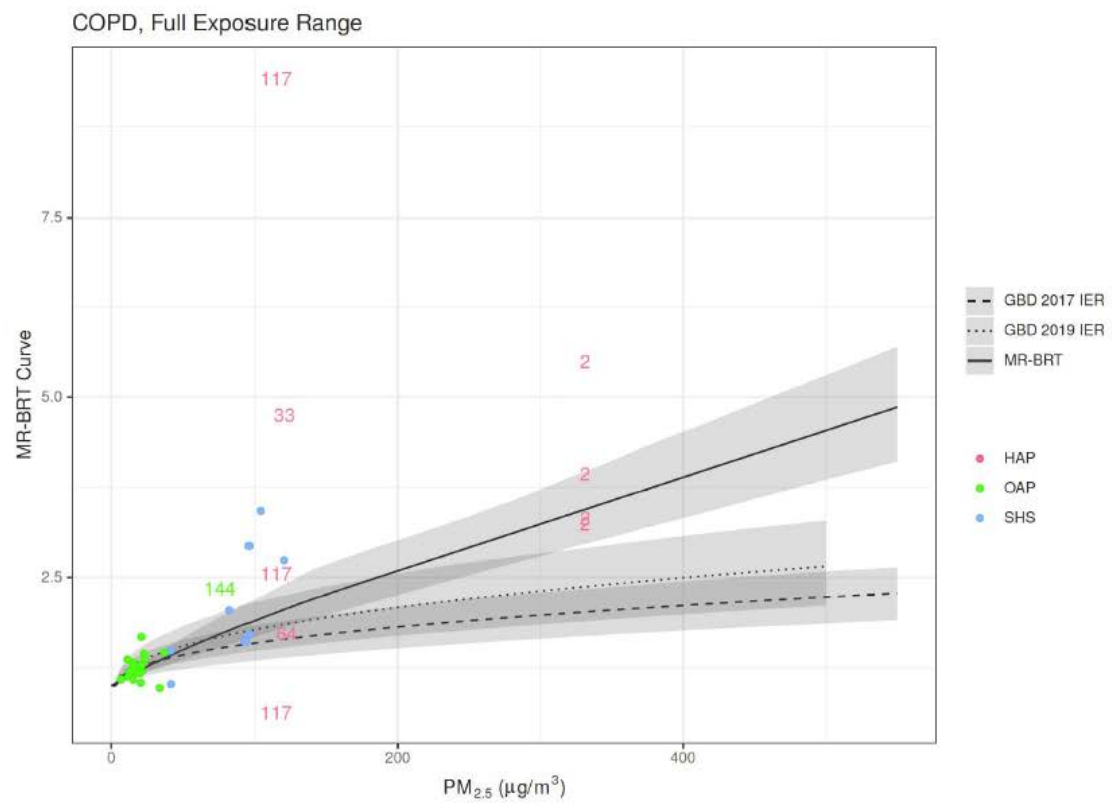



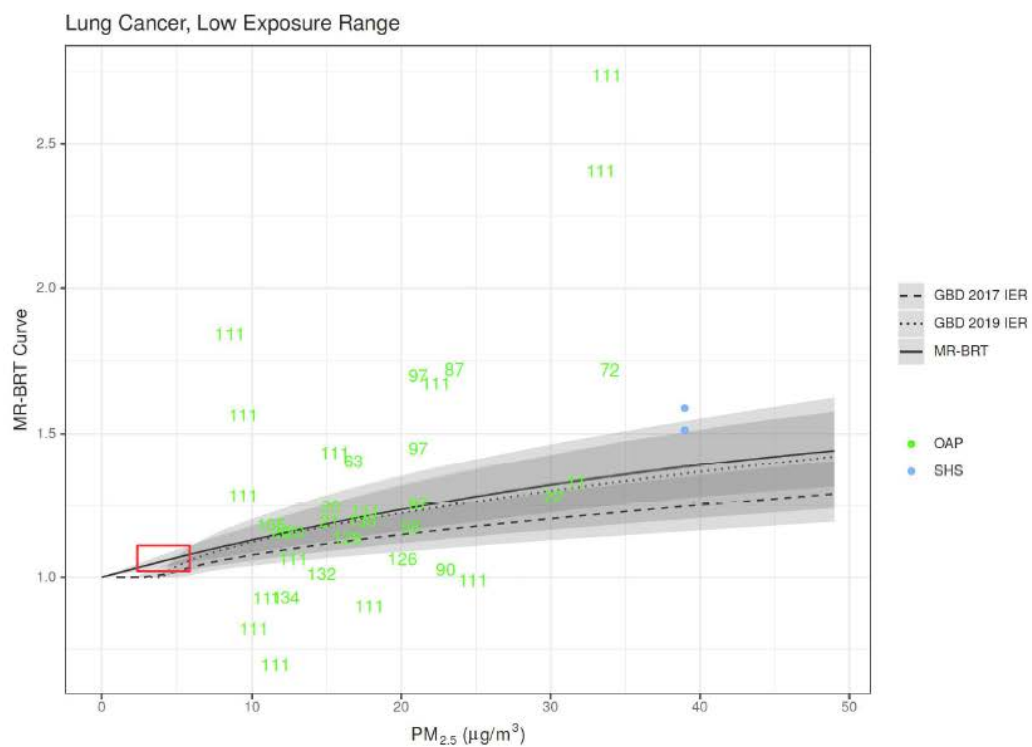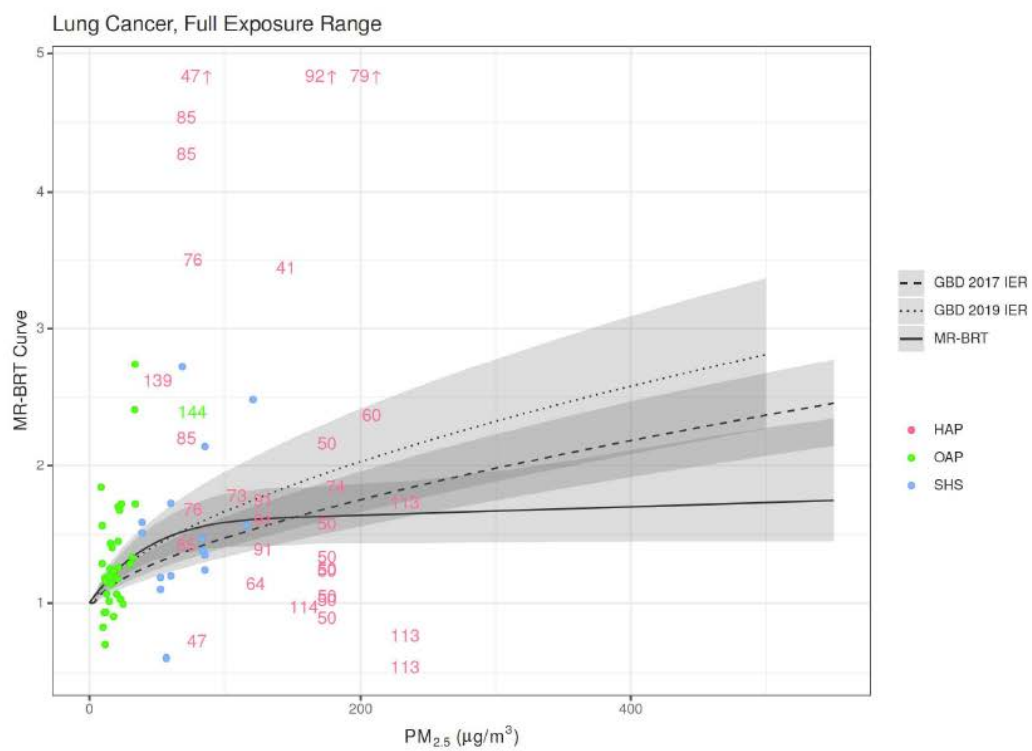

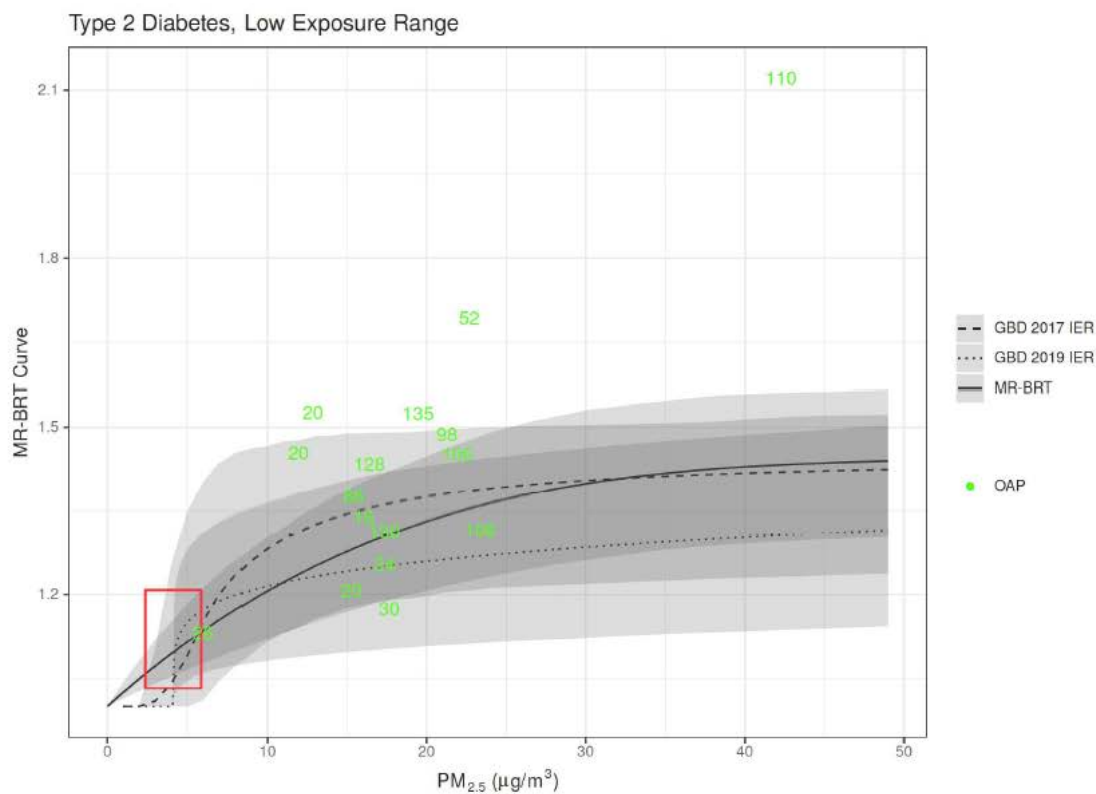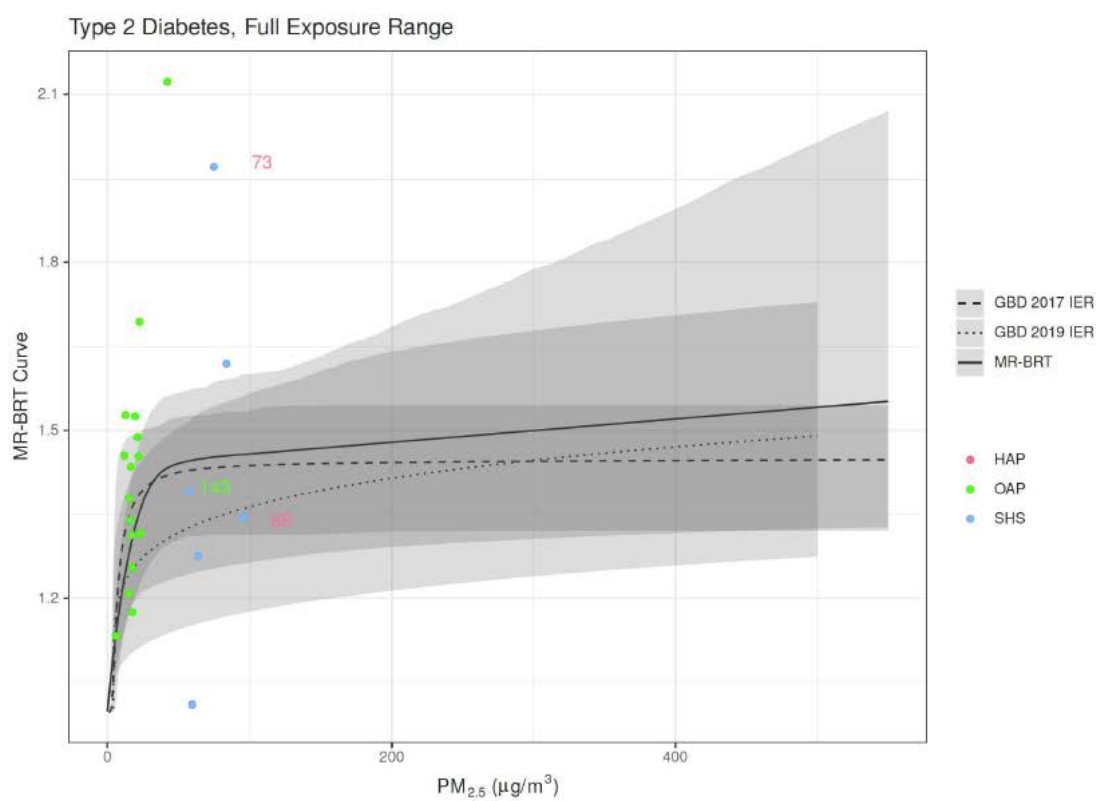

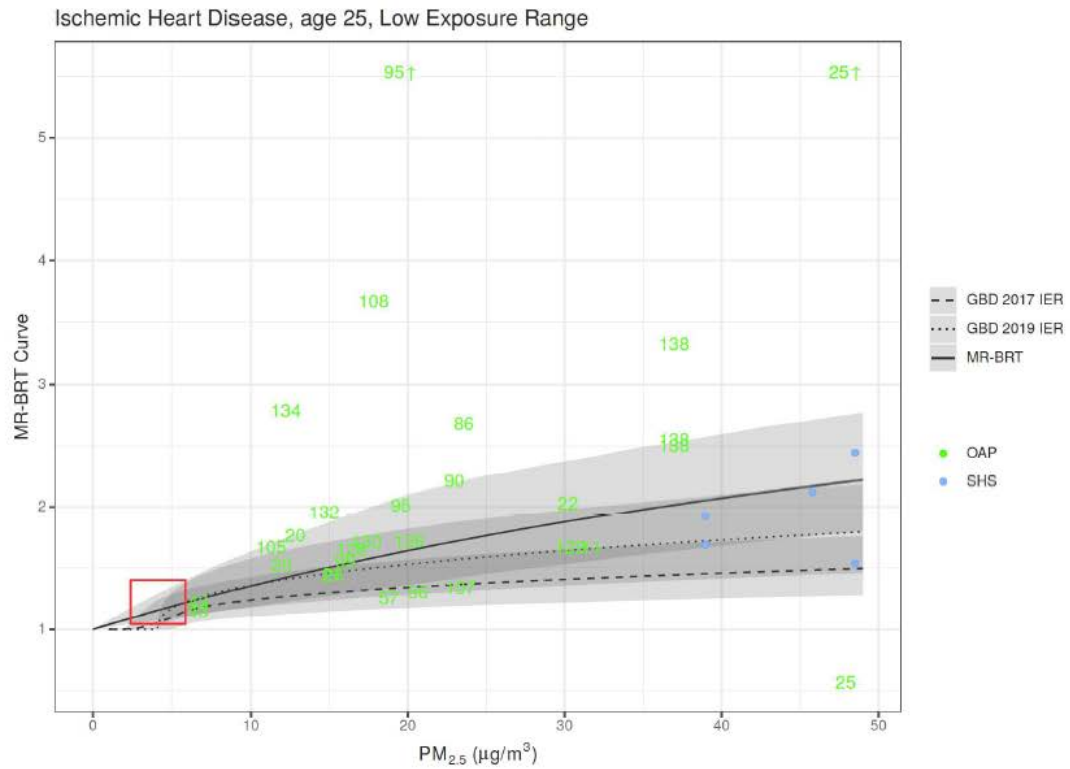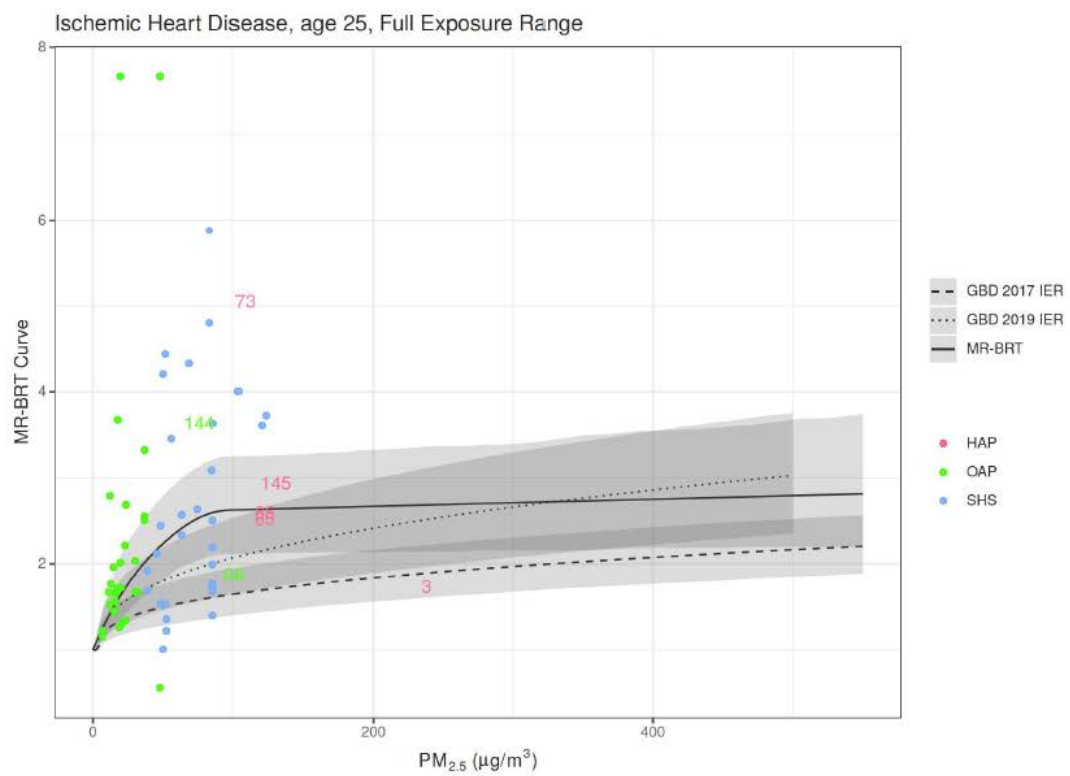



Ischemic Heart Disease, age 80, Low Exposure Range

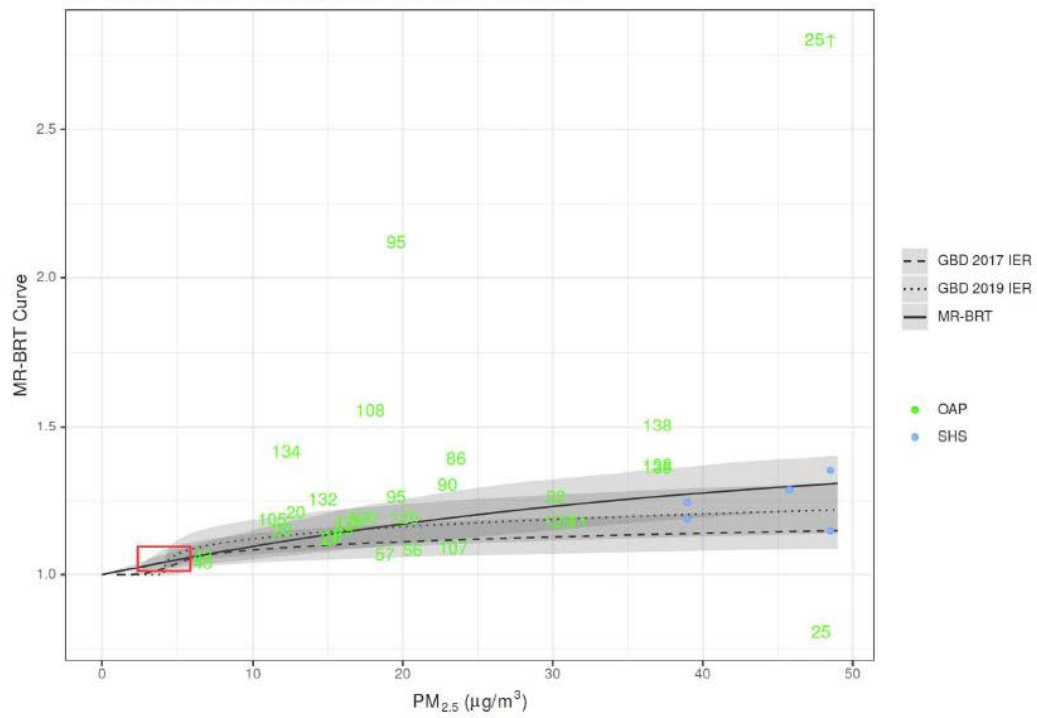

Ischemic Heart Disease, age 80, Full Exposure Range

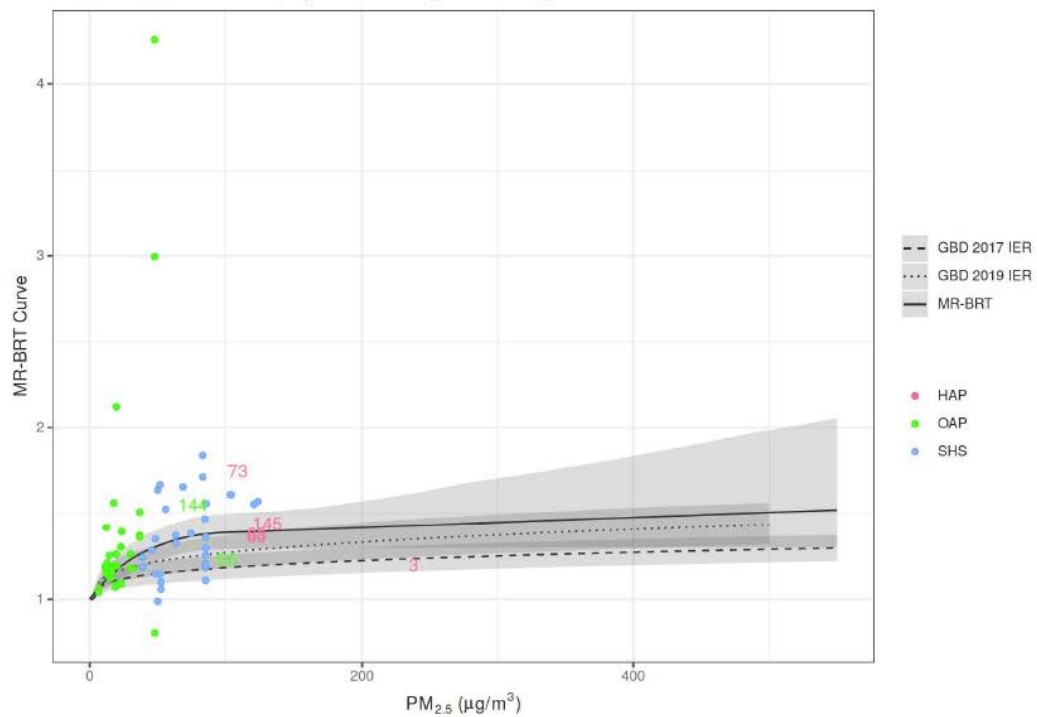



Stroke, age 50, Low Exposure Range

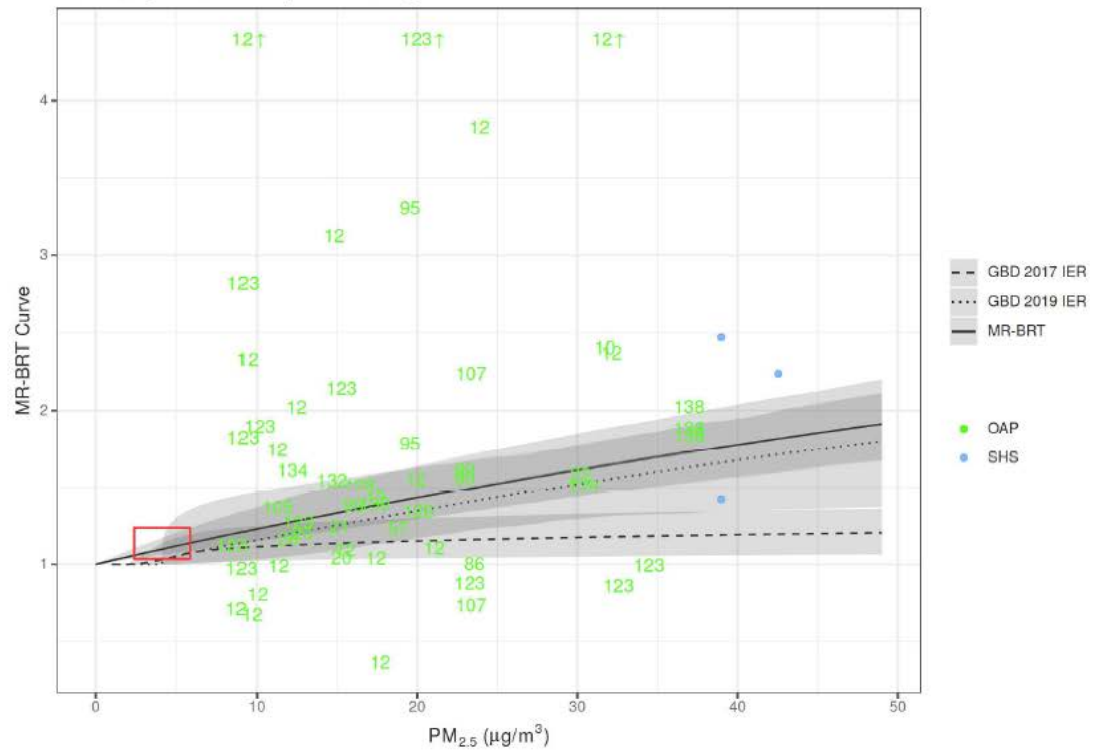

Stroke, age 50, Full Exposure Range

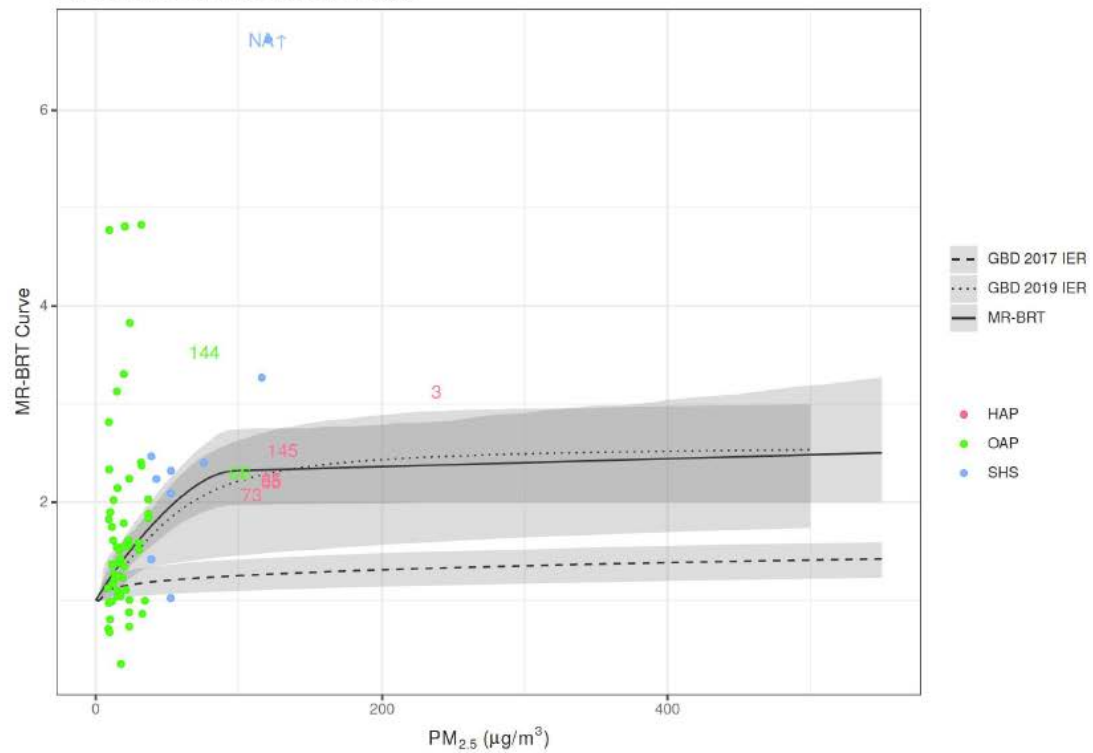

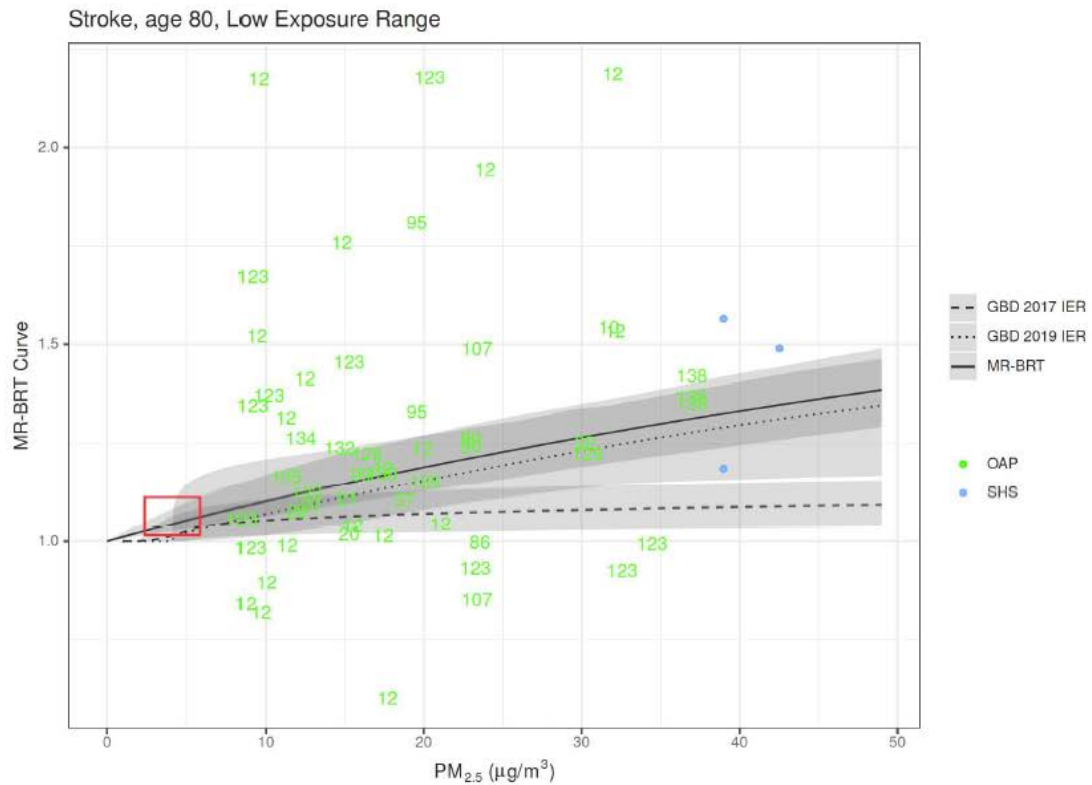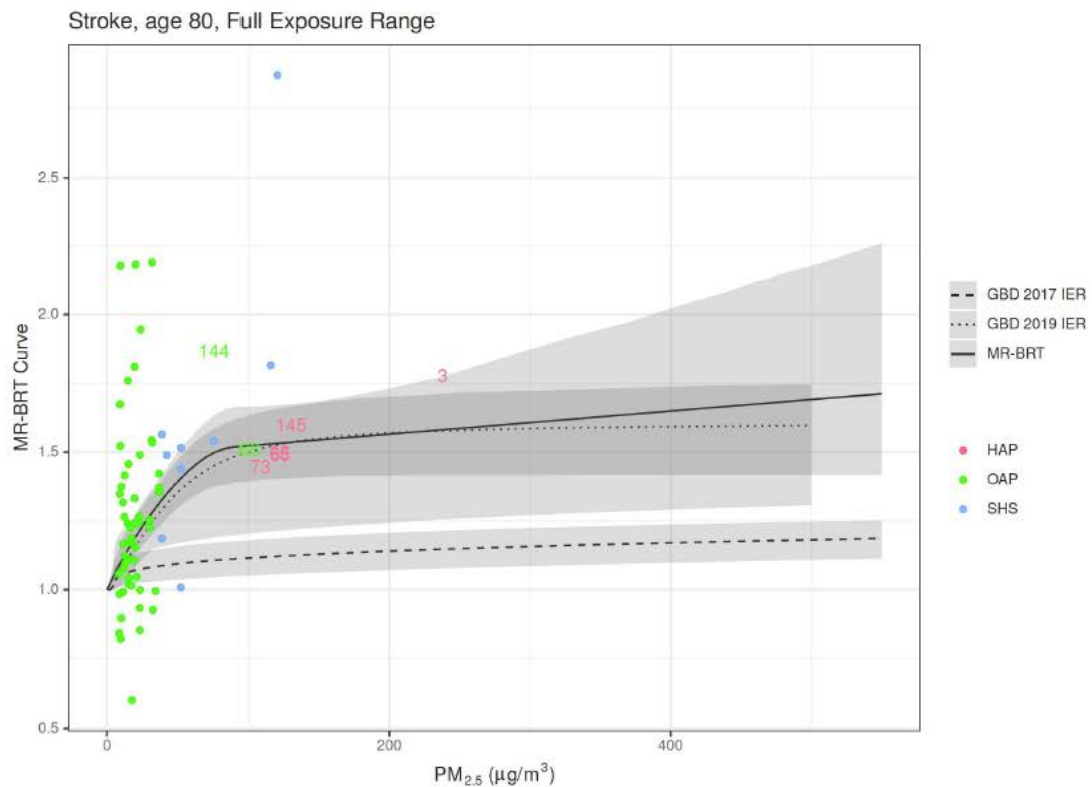

### ***Low birthweight and short gestation mediation analysis***

The outcomes of low birthweight and short gestation include mortality due to diarrhoeal diseases, lower respiratory infections, upper respiratory infections, otitis media, meningitis, encephalitis, neonatal preterm birth, neonatal encephalopathy due to birth asphyxia and trauma, neonatal sepsis

and other neonatal infections, haemolytic disease and other neonatal jaundice, and other neonatal disorders. We also calculate attributable YLDs for neonatal preterm birth. These are specific to ages 0-6 days and 7-27 days.

In partnership with Dr. Rakesh Ghosh at the University of California, San Francisco, we conducted a systematic review of all cohort, case-control, or randomised-controlled trial studies of ambient PM<sub>2.5</sub> pollution or household air pollution and birthweight or gestational age outcomes. Outcomes measured included continuous birthweight (bw), continuous gestational age (ga), low birthweight (LBW) (<2500 g), preterm birth (PTB) (<37 weeks), and very preterm birth (VPTB) (<32 weeks). We included any papers published until March 31, 2018. Systematic review PRISMA diagrams are below.

#### Ambient particulate matter pollution, low birth weight

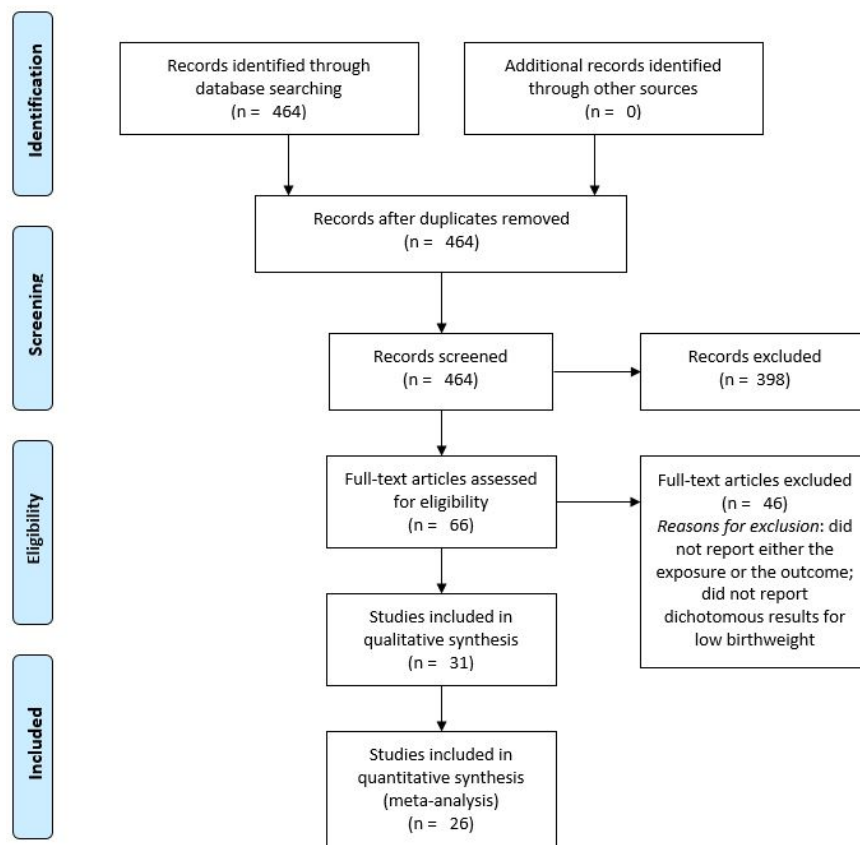

## Ambient particulate matter pollution, preterm birth

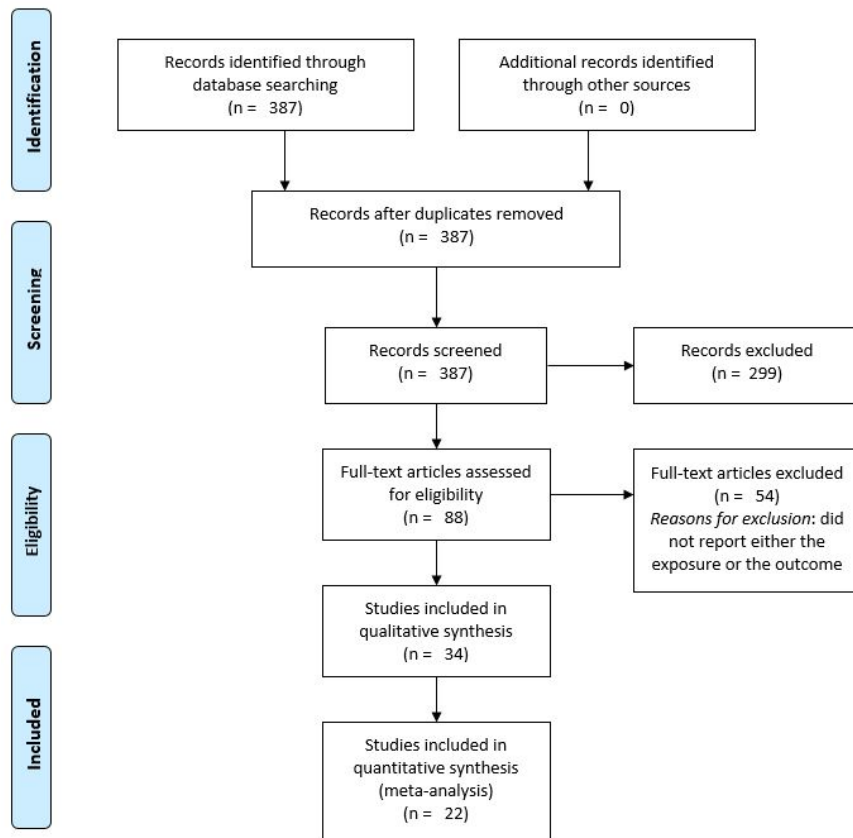

## Household air pollution, all outcomes

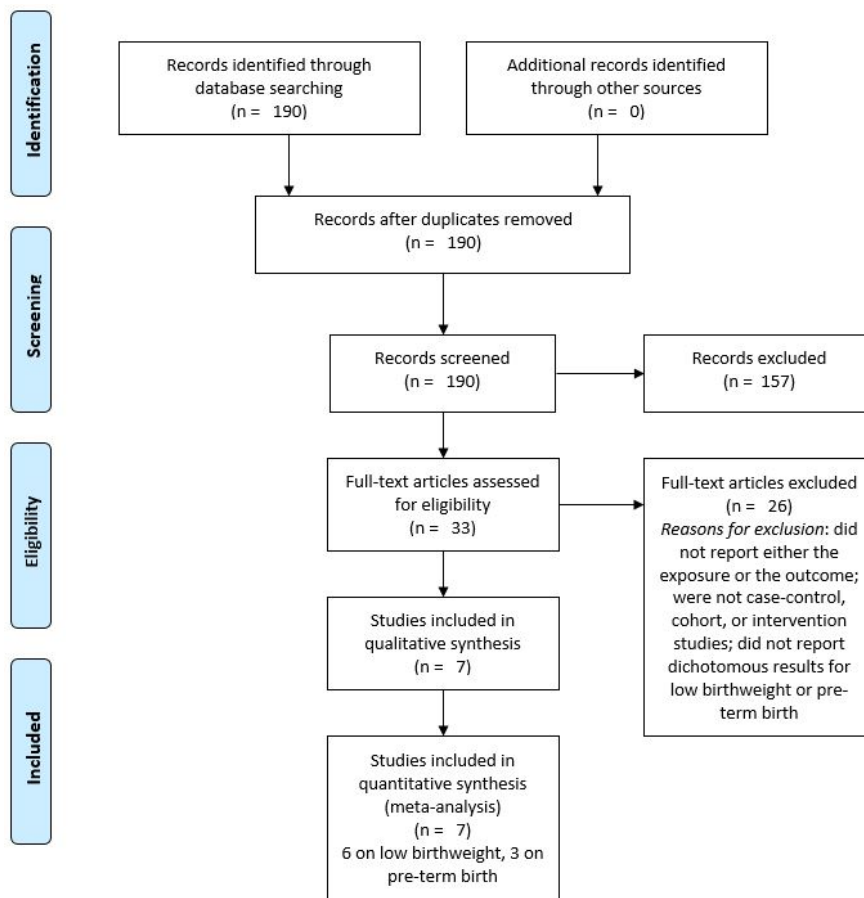

The following plots depict forest and funnel plots for studies of OAP and birthweight, low birthweight, and preterm birth. Note that these plots do not capture the exposure level of these studies but the linear risk or difference in birthweight per 10-unit increase in  $PM_{2.5}$  exposure.

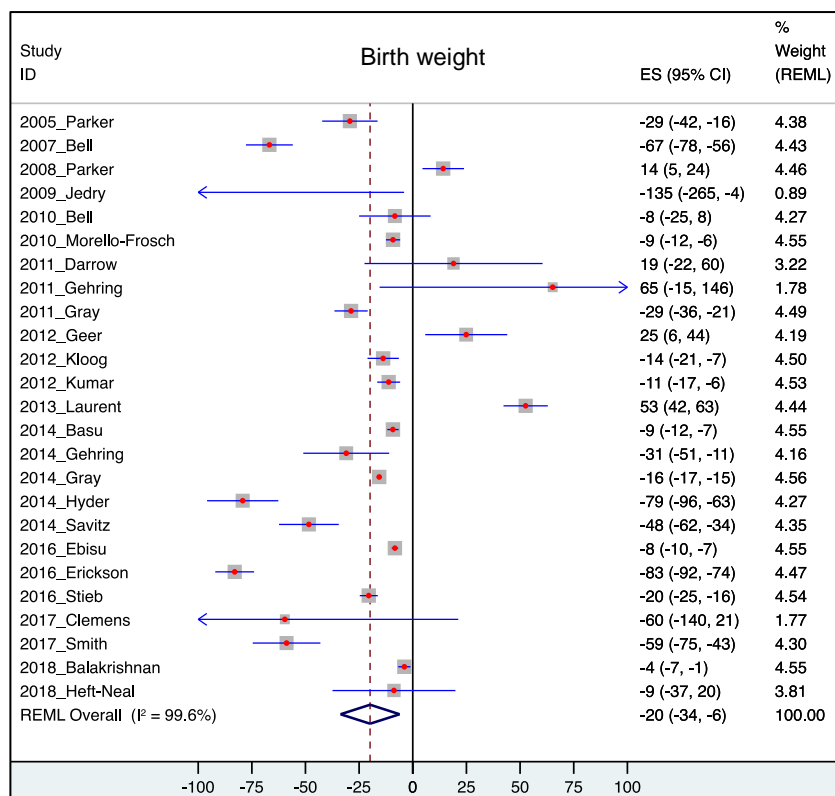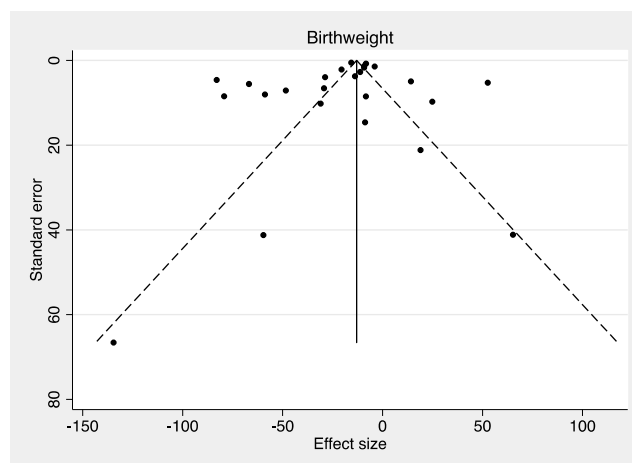

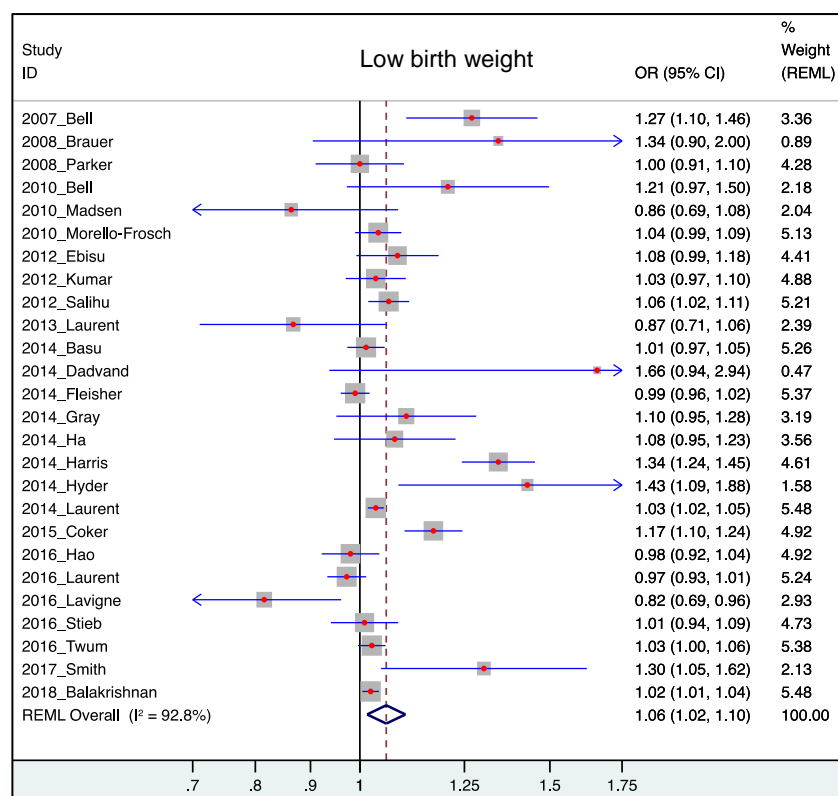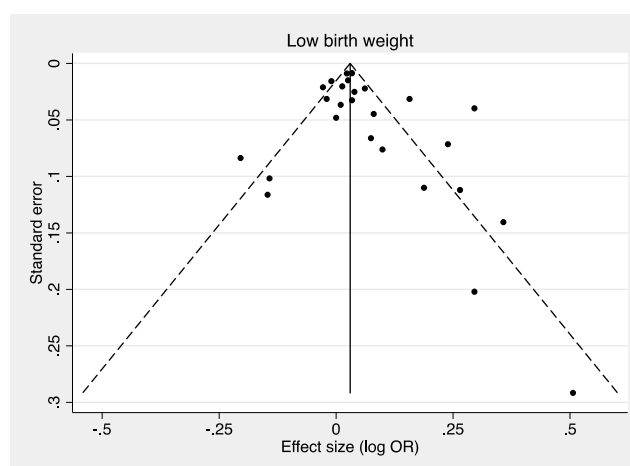

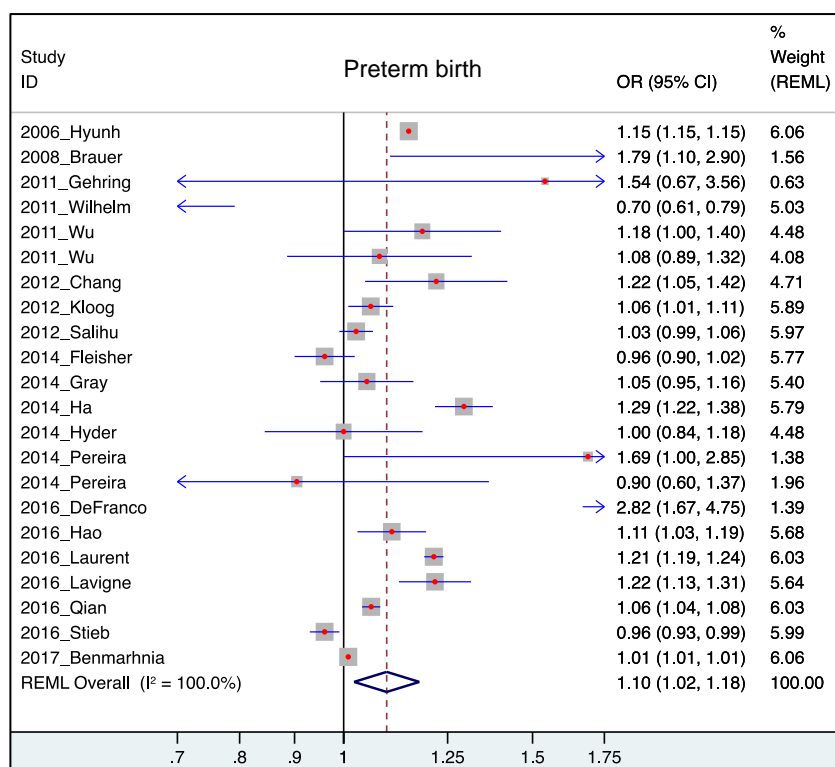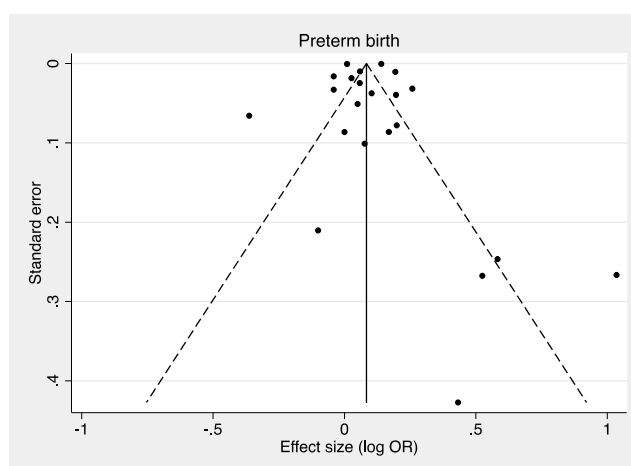

For studies of household air pollution, we used the same strategy described above to map them to  $PM_{2.5}$  exposure values.

Because birthweight and gestational age are modelled using a continuous joint distribution for the GBD, we were interested in how those distributions changed under the influence of PM<sub>2.5</sub> pollution. We therefore estimated the continuous shift in birthweight (bw, in grams) and gestational age (ga, in weeks) at a given PM<sub>2.5</sub> exposure level.

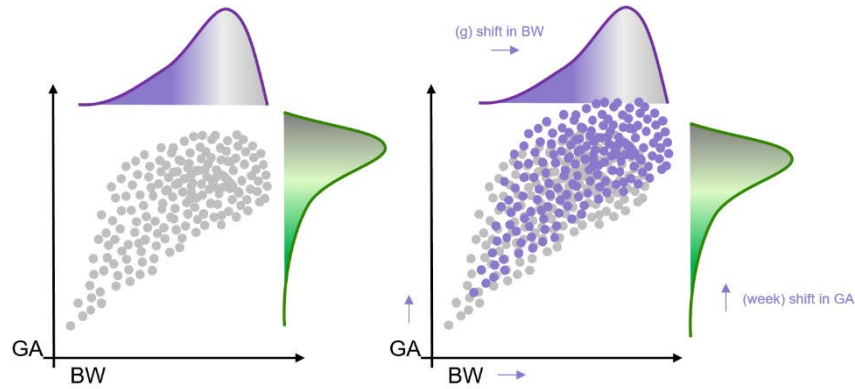

When available, we used estimates of continuous shift in bw or ga directly from each study. When that was not available, we used the published OR/RR/HR for LBW, PTB, or VPTB and the following strategy:

1. Extract the OR/RR/HR from the study.
2. Select the GBD 2017 estimated bw-ga joint distribution for the study location and year.
3. Calculate the number of grams or weeks required to shift the distribution such that the proportion of births under the specified threshold (P) is reduced by the study effect size to a counterfactual level ( $P_{cf}$ ).
4. Save the resulting shift and 95% CI as the continuous effect.

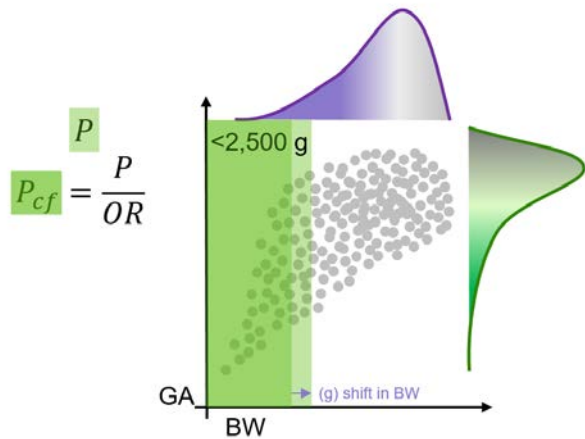

We then fit a MR-BRT spline to these studies, where the difference in the value of the model at the upper concentration (X) and the value of the model at the counterfactual concentration ( $X_{cf}$ ) is equal to the published or calculated shift in bw or ga. We fit the same model and priors as the non-mediated outcomes (with the exception of COPD), except, because the change in birthweight and gestational age was expected to be negative, the shape constraints were monotonically decreasing and concave up.

$$MRBRT(X) - MRBRT(X_{CF}) \sim Shift$$

The following figures depict the MR-BRT curves for shift in grams (bw) and weeks (ga).

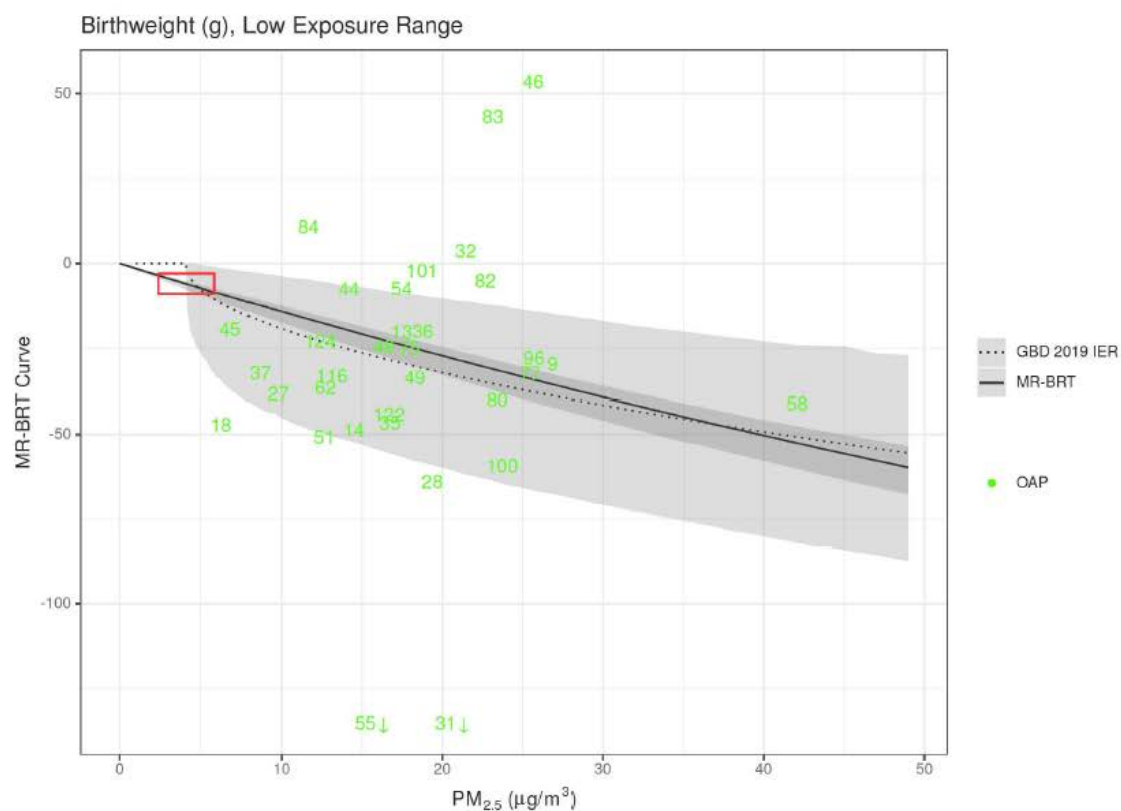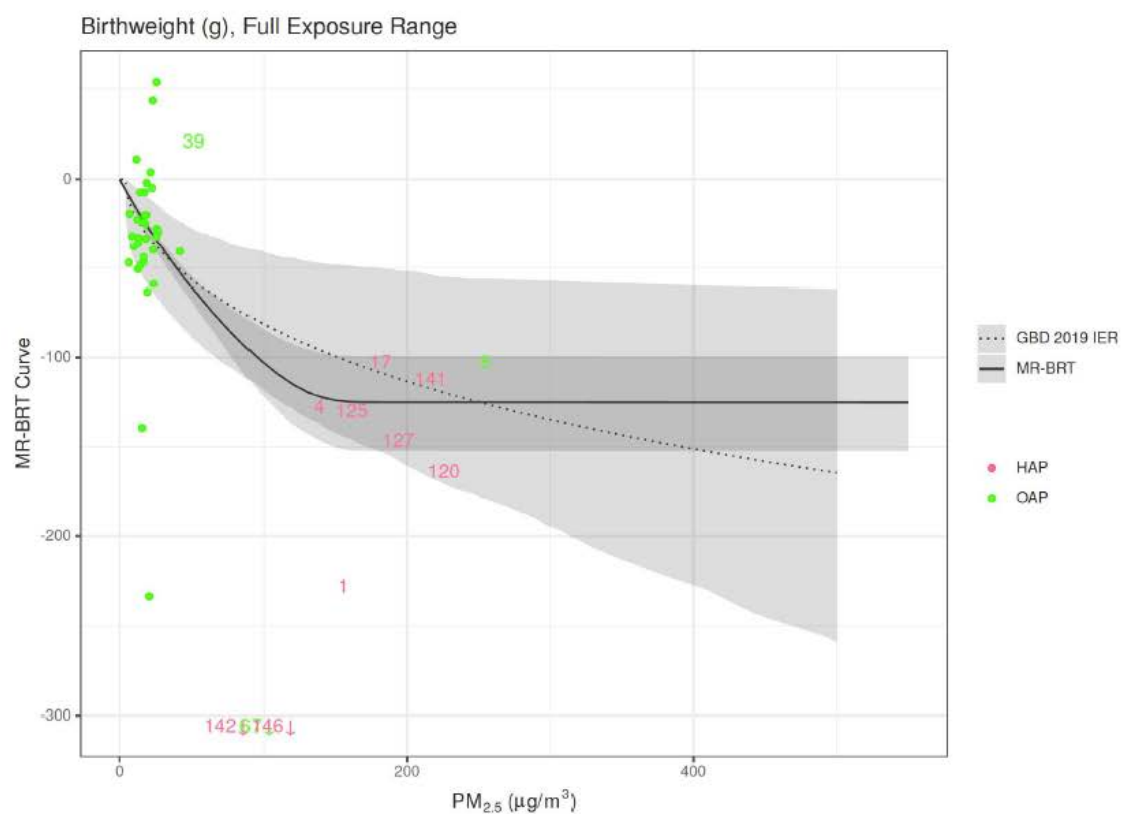

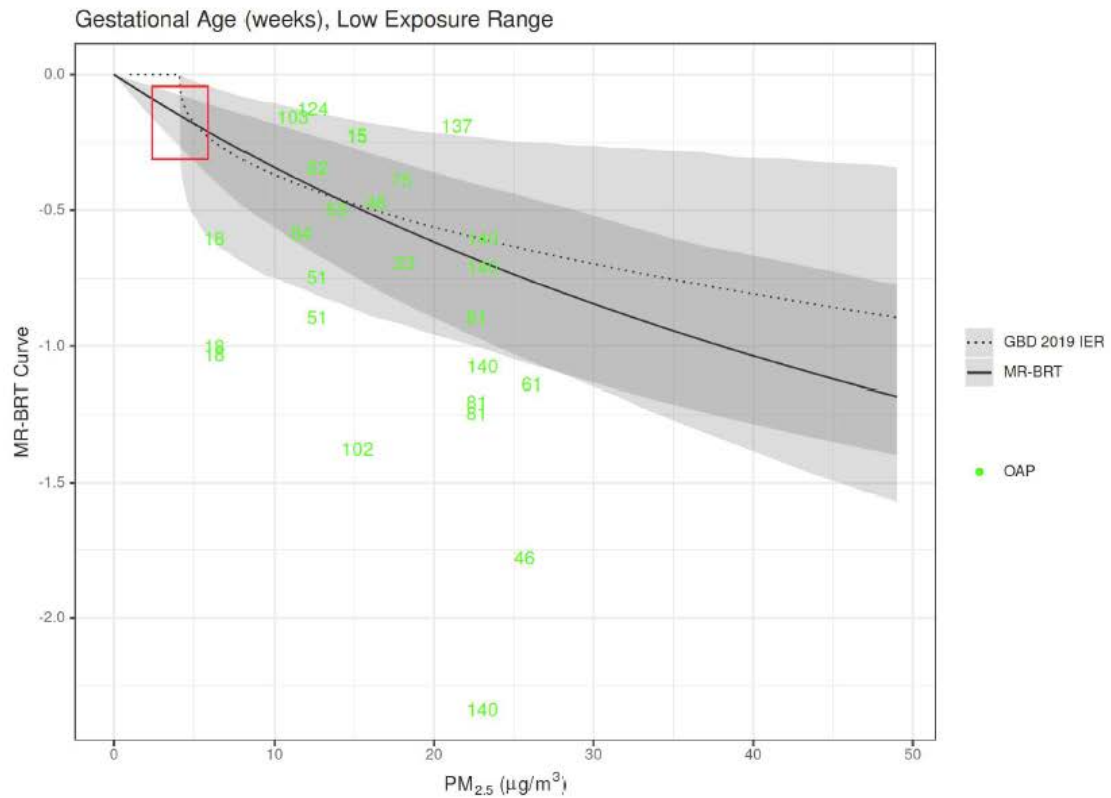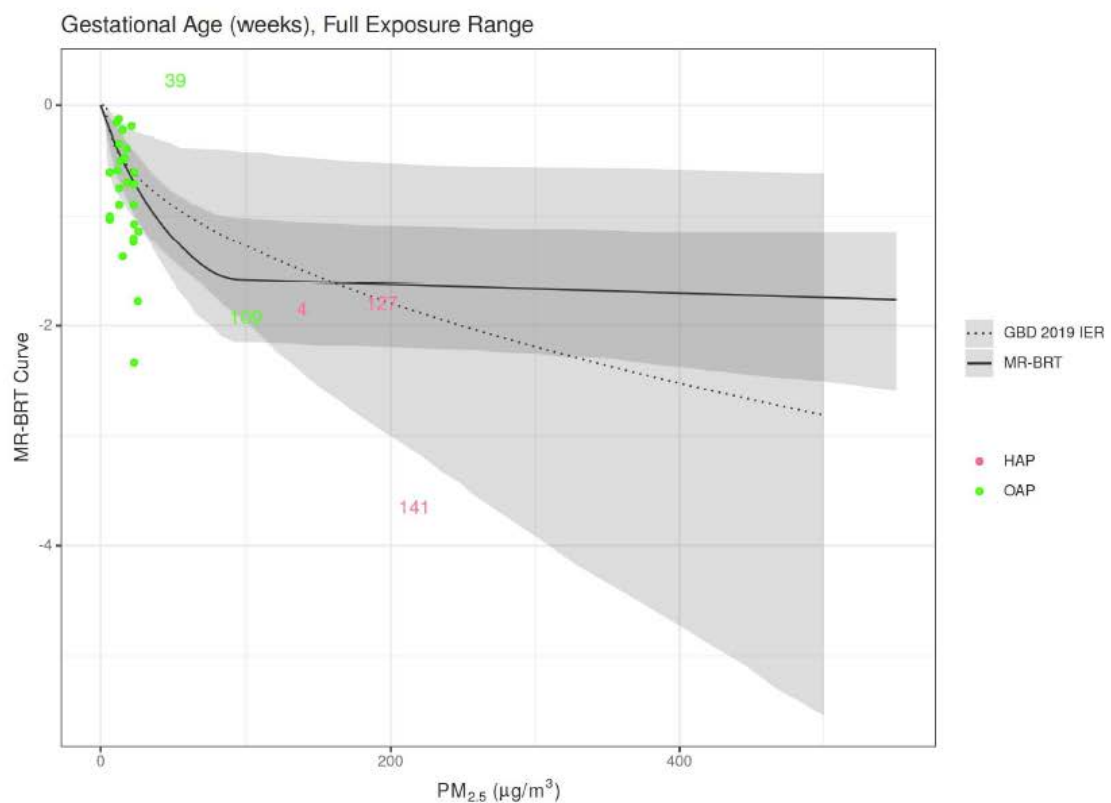

Once we had curves of estimated shifts across the exposure range, we predicted the shift in both birthweight and gestational age for total female particulate matter pollution exposure in each location and year. Because the epidemiological studies mutually controlled for birthweight and gestational age, we assumed these shifts are independent. We then shifted the observed

distributions to reflect the expected bwga distribution in the absence of particulate matter pollution. These shifted distributions were used as the counterfactual in the PAF calculation equation to calculate the burden attributable to PM<sub>2.5</sub> pollution.

To calculate PAFs, the distribution is divided into 56 bw-ga categories, each with a unique RR. Let  $p_i$  be the observed proportion of babies in category,  $i$  and  $p_i'$  be the counterfactual proportion of babies in category,  $i$  if there were no particulate matter pollution.

$$PAF_{PM} = \frac{\sum_{i \in bwga \text{ category}} RR_i p_i - \sum_{i \in bwga \text{ category}} RR_i p_i'}{\sum_{i \in bwga} RR_i p_i}$$

We proportionately split this PAF to ambient and HAP based on exposure as is described below. One important assumption to note is that we are assuming the shift in bw and ga is linear across the bwga distribution.

For lower respiratory infections, we have directly estimated PAFs attributable to PM<sub>2.5</sub> in addition to those mediated through birthweight and gestational age. We would expect that some of the directly estimated PAFs are mediated through bw and ga. Additionally, the directly estimated PAF is based on a summary of relative risks for all children under 5 years, so there is a chance that the mediated PAF, which is more finely resolved, could be greater. To avoid double-counting for these two age groups (0-6 days and 0-27 days), we take the max of the two PAF estimates. If the directly estimated PAF is greater than the bw-ga-mediated PAF, we take the direct estimate, and if the mediated PAF is greater, we take the mediated.

PTB incidence and mortality are both outcomes measured in the GBD. 100% of the burden for this cause is attributable to short gestation. To calculate the percentage attributable to particulate matter pollution, we estimated the percentage of babies born at less than 37 weeks ( $p_{ptb}$ ) and the percentage of babies that would have been born at less than 37 weeks in the counterfactual scenario of no particulate matter pollution ( $p_{ptb}'$ ).

$$PAF_{ptb,pm} = 1 - \frac{p_{ptb}'}{p_{ptb}}$$

### Limitations

Although in GBD 2019 we have not used active smoking data to estimate the risk curves, we are still using an integrated exposure response approach because we are integrating relative risk estimates across various exposure sources: ambient, SHS, and HAP. The use of various sources to construct a risk curve with PM<sub>2.5</sub> as the exposure indicator assumes equitoxicity of particles, despite some evidence suggesting differences in health impact by PM source, size, and chemical composition. However, in the absence of consistent and robust evidence of differential toxicity by source and sufficient estimates of source or composition-specific exposure-response relationships, integrating across OAP, SHS, and HAP studies is the approach most consistent with the current evidence, as reviewed by US EPA and WHO.<sup>20,21</sup> Use of a common risk function may affect the magnitude of risk estimates for HAP and OAP compared to separate risk functions. As more data from higher OAP concentration locations and from HAP studies for non-respiratory outcomes becomes available it may be possible to evaluate the strength of evidence for each and to develop separate risk functions.

### Proportional PAF approach

Prior to GBD 2017, relative risks for both exposures were obtained from the IER as a function of exposure and relative to the same TMREL. In reality, were a country to reduce only one of these risk

factors, the other would remain. We did not consider the joint effects of particulate matter from outdoor exposure and burning solid fuels for cooking. For GBD 2017 we developed a new approach to use the IER for obtaining PAFs for both OAP and HAP:

Let  $Exp_{OAP}$  be the ambient  $PM_{2.5}$  exposure level and  $Exp_{HAP}$  be the excess exposure for those who use solid fuel for cooking. Let  $P_{HAP}$  be the proportion of the population using solid fuel for cooking. We calculated PAFs at each  $0.1^\circ \times 0.1^\circ$  grid cell. We assumed that the distribution of those using solid fuel for cooking (HAP) was equivalent across all grid cells of the GBD location.

For the proportion of the population not exposed to HAP the relative risk was:

$$RR_{OAP} = MRBRT(z = Exp_{OAP})/MRBRT(z = TMREL),$$

And for those exposed to HAP, the relative risk was

$$RR_{HAP} = MRBRT(z = Exp_{OAP} + Exp_{HAP})/MRBRT(z = TMREL).$$

We then calculate a population level RR and PAF for all particulate matter exposure.

$$RR_{PM} = RR_{OAP}(1 - P_{HAP}) + RR_{HAP}P_{HAP}$$

$$PAF_{PM} = \frac{RR_{PM} - 1}{RR_{PM}}$$

We population weight the grid-cell level particulate matter PAFs to get a country level PAF, and finally, we split this PAF based on the average exposure to each OAP and HAP.

$$PAF_{OAP} = \frac{Exp_{OAP}}{Exp_{OAP} + P_{HAP} * Exp_{HAP}} PAF_{PM}, \text{ and } PAF_{HAP} = \frac{P_{HAP} * Exp_{HAP}}{Exp_{OAP} + P_{HAP} * Exp_{HAP}} PAF_{PM}.$$

With this strategy,  $PAF_{PM} = PAF_{HAP} + PAF_{OAP}$ , and no burden is counted twice.

## References

1. Hammer, M. S., A. van Donkelaar, R. V. Martin, C. Li, A. Lyapustin, A. M. Sayer, C. N. Hsu, R. C. Levy, M. J. Garay, O. V. Kalashnikova, R. A. Kahn, M. Brauer, J. S. Apte, D. K. Henze, L. Zhang, and Q. Zhang (submitted), Improved Global Estimates of Fine Particulate Matter Concentrations and Trends Derived from Updated Satellite Retrievals, Modeling Advances, and Additional Ground-Based Monitors, *Environ. Sci. Technol.*
2. van Donkelaar, A.; Martin, R. V.; Brauer, M.; Hsu, N. C.; Kahn, R. A.; Levy, R. C.; Lyapustin, A.; Sayer, A. M.; Winker, D. M. Global Estimates of Fine Particulate Matter using a Combined Geophysical-Statistical Method with Information from Satellites, Models, and Monitors. *Environ. Sci. Technol.* 2016, 50 (7), 3762–3772
3. Shaddick, G., Thomas, M.L., Jobling, A., Brauer, M., van Donkelaar, A., Burnett, R., Chang, H., Cohen, A., Van Dingenen, R., Dora, C. and Gumy, S., 2016. Data Integration Model for Air Quality: A Hierarchical Approach to the Global Estimation of Exposures to Ambient Air Pollution. *Journal of Royal Statistical Society Series C (Applied Statistics)*. 2017. DOI: 10.1111/rssc.12227
4. Shaddick, G., Thomas, M. L., Mudu, P., Ruggeri, G. and Gumy, S. Half the world's population are exposed to increasing air pollution. Accepted by *Nature Climate and Atmospheric Science*.
5. Brauer, M.; Freedman, G.; Frostad, J.; van Donkelaar, A.; Martin, R. V.; Dentener, F.; Van Dingenen, R.; Estep, K.; Amini, H.; Apte, J. S.; et al. Ambient Air Pollution Exposure Estimation for the Global Burden of Disease 2013. *Environ. Sci. Technol.* 2015, 50 (1), 79–88.

6. Shaddick G, Thomas M, Amini H, Broday DM, Cohen A, Frostad J, Green A, Gumy S, Liu Y, Martin RV, Prüss-Üstün A, Simpson D, van Donkelaar A, Brauer M. Data integration for the assessment of population exposure to ambient air pollution for global burden of disease assessment. *Environ Sci Technol*. 2018 Jun 29. doi: 10.1021/acs.est.8b02864
7. Rue, H.; Martino, S.; Chopin, N.; Approximate Bayesian inference for latent Gaussian models by using integrated nested Laplace approximations. *Journal of the royal statistical society: Series b (statistical methodology)*. 2009;71(2):319-92.
8. Thomas, M. L., Shaddick, G., Simpson, D., de Hoogh, K. and Zidek, J. V. Spatio-temporal downscaling for continental-scale estimation of air pollution concentrations. arXiv preprint arXiv:1907.00093 (also been Submitted to the Journal of the Royal Statistical Society: Series C (Applied Statistics)).
9. Wood, S. N. (2017). *Generalized additive models: an introduction with R*. Chapman and Hall/CRC.
10. Turner MC, Jerrett M, Pope CA 3rd, Krewski D, Gapstur SM, Diver WR, Beckerman BS, Marshall JD, Su J, Crouse DL, Burnett RT. Long-term ozone exposure and mortality in a large prospective study. *Am J Respir Crit Care Med*. 2016; 193(10): 1134-42.
11. Yin P, Brauer M, Cohen A, et al. Long-term Fine Particulate Matter Exposure and Nonaccidental and Cause-specific Mortality in a Large National Cohort of Chinese Men. *Environ Health Perspect* 2017; 125: 117002.
12. Li T, Zhang Y, Wang J, et al. All-cause mortality risk associated with long-term exposure to ambient PM<sub>2.5</sub> in China: a cohort study. *Lancet Public Health* 2018; 3: e470–7.
13. Yang Y, Tang R, Qiu H, et al. Long term exposure to air pollution and mortality in an elderly cohort in Hong Kong. *Environ Int* 2018; 117: 99–106.
14. Hystad P, Larkin A, Rangarajan S, AlHabib KF, Avezum A, Tumerdem Calik KB; Chifamba J, Dans A, Diaz R, du Plessis JL, Gupta R, Iqbal R, Khatib R, Kelishadi R, Lanan F, Liu Z, Lopez-Jaramillo P, Nair S, Poirier P, Rahman O, Rosengren A, Swidan H, Tse L-A, Wei L, Wielgosz A, Yeates K, Yusuf K, Zatoński T, Yusuf S, Brauer M. Outdoor fine particulate matter air pollution and cardiovascular disease: Results from 747 communities across 21 countries in the PURE Study. (Submitted to *Lancet Global Health*)
15. Joseph P, Rangarajan S, Islam S, Mente A, Hystad P, Brauer M, Raman Kutty V, Gupta R, Wielgosz A, AlHabib KF, Dans A, Lopez-Jaramillo P, Avezum A, Lanan F, Oguz A, Kruger IM, Diaz R, Yusuf K, Mony P, Chifamba J, Yeates K, Kelishadi R, Yusufali A, Khatib R, Rahman O, Zatońska K, Iqbal R, Wei L, Bo H, Rosengren A, Kaur M, Mohan V, Lear SA, Teo KK, O'Donnell M, McKee M, Dagenais G, Yusuf S. Modifiable risk factors, cardiovascular disease and mortality in 155,722 individuals from 21 high-, middle-, and low-income countries (PURE): a prospective cohort study. *The Lancet*. 2019. doi:10.1016/S0140-6736(19)32008-2
16. Burnett RT, Pope CA 3rd, Ezzati M, Olives C, Lim SS, Mehta S, Shin HH, Singh G, Hubbell B, Brauer M, Anderson HR, Smith KR, Balmes JR, Bruce NG, Kan H, Laden F, Prüss-Ustün A, Turner MC, Gapstur SM, Diver WR, Cohen A. An integrated risk function for estimating the global burden of disease attributable to ambient fine particulate matter exposure. *Environ Health Perspect*. 2014; 122(4): 397-403.
17. Pope CA III, Cohen AJ, Burnett RT. Cardiovascular Disease and Fine Particulate Matter: Lessons and Limitations of an Integrated Exposure Response Approach. *Circulation Research*. 2018;122:1645-1647.
18. Lind L, Sundström J, Årnlöv J, Lampa E. Impact of Aging on the Strength of Cardiovascular Risk Factors: A Longitudinal Study Over 40 Years. *J Am Heart Assoc*. 2018;7(1):e007061. Published 2018 Jan 6. doi:10.1161/JAHA.117.007061
19. Semple S, Apsley A, Ibrahim TA, Turner SW, Cherrie JW. Fine particulate matter concentrations in smoking households: just how much secondhand smoke do you breathe in if you live with a smoker who smokes indoors? *Tob Control* 2015; 24: e205–11.

20. US Environmental Protection Agency. Integrated science assessment (ISA) for particulate matter (Final Report, Dec 2009). EPA/600/R-08/139F, 2009. Washington, DC: US Environmental Protection Agency; 2009. Available at: <http://cfpub.epa.gov/ncea/risk/recordisplay.cfm?deid=216546>
21. World Health Organization. Review of evidence on health aspects of air pollution – REVIHAAP Project technical report. Copenhagen: WHO Regional Office for Europe; 2013. Available at: [http://www.euro.who.int/\\_\\_data/assets/pdf\\_file/0004/193108/REVIHAAP-Final-technical-report-final-version.pdf?ua=1](http://www.euro.who.int/__data/assets/pdf_file/0004/193108/REVIHAAP-Final-technical-report-final-version.pdf?ua=1)

# Ambient ozone pollution

## Flowchart

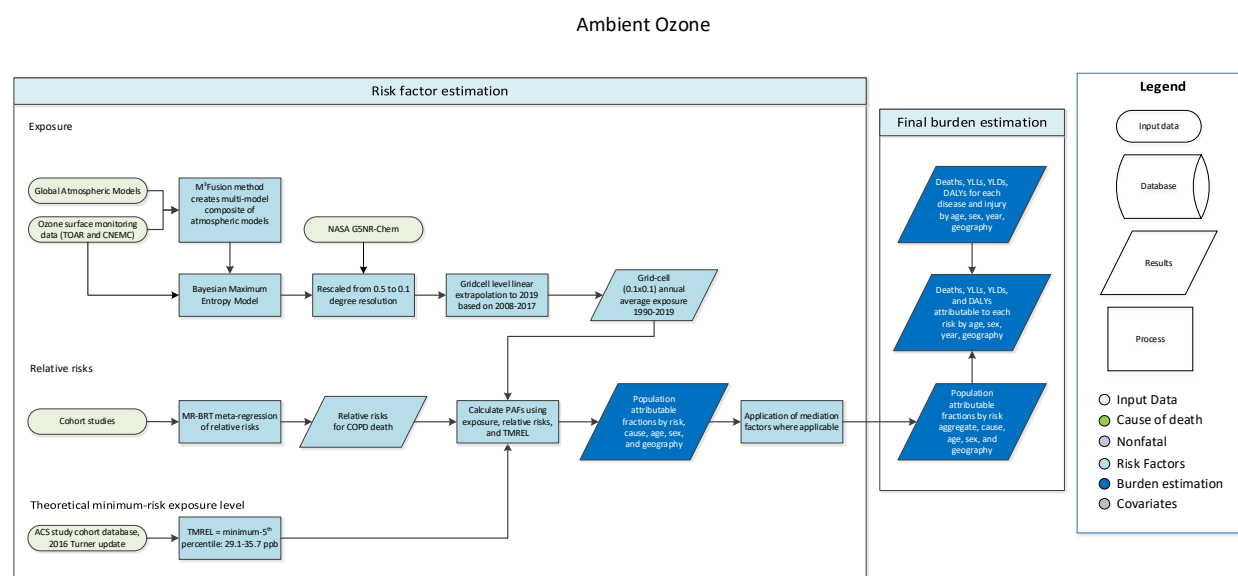

## Input data and methodological summary

### Exposure

To estimate the global distribution of exposure to ozone in ambient air (the highest seasonal [six-month] average of eight-hour daily maximum ozone concentrations, in parts per billion [ppb]) for the years 1990 to 2017, ozone ground measurement data were combined with chemical transport model estimates using Bayesian maximum entropy. Table 1 summarizes exposure input data.

**Table 1: Exposure Input Data**

| Input data                    | Exposure |
|-------------------------------|----------|
| Source count (total)          | 14       |
| Number of countries with data | 1        |

### Measurements data

Ozone monitoring data were obtained from the Tropospheric Ozone Assessment Report (TOAR), which contains the world's largest collection of surface ozone metrics (Schultz and colleagues, 2017). Since TOAR has released data until 2015 to the public, an update was made to include readily available datasets until 2017. In addition to TOAR, our analysis included ozone data from the China National Environmental Monitoring Center (CNEMC) Network, which contains surface ozone measurements for 2013–2017 in China (Lu and colleagues, 2018). All observations were processed to provide the six-month ozone season average of eight-hour daily maximum ozone concentrations.

### Model combination

We used a combination of global atmospheric chemical transport models in our analysis, many of which simulated specified dynamics for the Chemistry-Climate Model Initiative (CCMI) (Morgenstern et al., 2017). Note that some of these modelling teams completed extra years of simulations beyond 2010 specifically for this project. The eight models and years available include the following: CHASER (1990–2010), MOCAGE (1988–2016), MRI-ESM (1988–2017), NASA MERRA2-GMI (1988–2017), NCAR CESM-Chem (1988–2010), NCAR WACCM (1988–2010), GFDL AM3 (1988–2014), and GFDL AM4 (2010–2016).

We obtained hourly ozone data for each of these models and then calculated the six-month maximum daily eight-hour maximum ozone mixing ratio (ppb). The M<sup>3</sup>Fusion method (Chang and colleagues, 2019) was used to create a multi-model composite of the specified-dynamics models in each year from 1990 to 2017. This multi-model composite finds the linear combination of models available for each year that minimises the mean square error as compared to the observations in each world region, and in the process it corrects to minimise the mean model bias in each region. The world was divided geographically into eight regions: North America, South America, Europe, Africa, south central Asia, east Asia, Russia, and Oceania. In every region, each model was weighted to minimise the difference between the multi-model average and observations as described by the following:

*Let  $s_g$  be the grid cell at resolution  $0.5^\circ \times 0.5^\circ$ ,  $\hat{y}(s_g)$  be the interpolated observations,  $\{\eta_k(s_g); k = 1, \dots, n\}$  be the model output registered onto the same grid from the  $n$  models available in a given year.  $\alpha_r$  is a constant that allows adjustment to the overall (regional) underestimation or overestimation and  $\beta_{rk}$  is an optimal weight for the  $k$ -th model in region  $r$ .*

$$\begin{aligned} & \underset{\{\alpha_r, \beta_{rk}; k = 1, \dots, n\}}{\text{minimize}} \sum_{s_g \in \text{Region } r} \left( \hat{y}(s_g) - \alpha_r - \sum_{k=1}^n \beta_{rk} \eta_k(s_g) \right)^2, \\ & \text{subject to } \sum_{k=1}^n \beta_{rk} = 1 \text{ and } \beta_{rk} \geq 0 \end{aligned}$$

In the M<sup>3</sup>Fusion method, weights are constrained to be positive and sum to 1. A constant offset,  $\alpha_r$ , was included to guarantee that the residuals from this optimisation have a zero mean, through which the mean model bias is corrected (Chang and colleagues, 2019). In most regions and years, the multi-model mean ozone was biased high, so this method tends to decrease the average ozone.

Since the M<sup>3</sup>Fusion method relies on surface measurements to change the weights, regions with sparse data had to be taken into account. North America and Europe use weights-based model and observation values for each individual year. The rest of the world regions (South America, Africa, south central Asia, east Asia, Russia, and Oceania) use individual year weights for 2000–2010, and apply weights calculated from the aggregated 2000 to 2010 period for 1990–1999. For 2011–2017, east Asia uses individual year weights, while South America, Africa, south central Asia, Russia, Oceania, and Antarctica use weights from the aggregated 2011–2014 period.

An example of the weighted values used to create the M<sup>3</sup>Fusion model in North America and Europe are shown below, accompanied by a map of the M<sup>3</sup>Fusion model in 2005.

|           | North America |      | Europe |      |
|-----------|---------------|------|--------|------|
| Year      | 1995          | 2005 | 1995   | 2005 |
| CESM-Chem | 0.38          | 0.29 |        |      |
| CHASER    | 0.04          |      |        |      |
| GFDL-AM3  |               |      | 0.18   | 0.62 |
| MERRA     |               | 0.32 | 0.82   | 0.38 |
| MOCAGE    | 0.36          | 0.01 |        |      |
| MRI-ESM   | 0.22          | 0.27 |        |      |
| WACCM     |               | 0.11 |        |      |

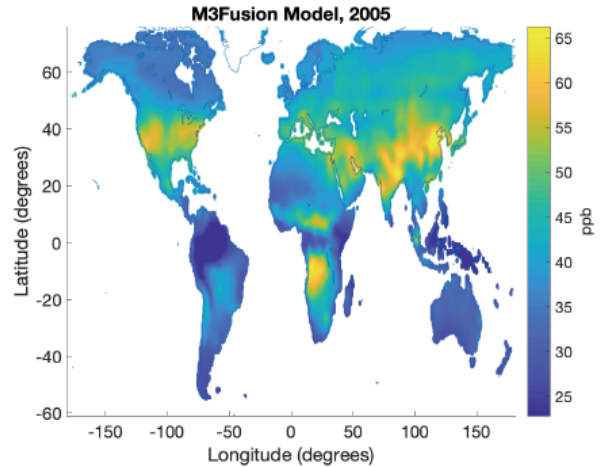

### **Bayesian maximum Entropy (BME)**

BME is a geostatistical modelling tool that can be used to combine various knowledge bases for an air pollutant and combine them to create a single product. In this case, we use BME to combine site-specific measurements and modelled concentrations, making use of the correlations between measurement locations. BME uses the measurement values to correct the M<sup>3</sup>Fusion Model locally around each station spatially and temporally, allowing future and past observations to provide input. Since more measurement locations became available through time, this method allows later measurements to influence ozone surfaces earlier in the period, which is particularly important in China and data-sparse regions. The range over which each measurement can correct the M<sup>3</sup>Fusion Model and how each measurement's impact decreases over distance in time and space are calculated as part of BME.

Beyond combining these knowledge bases to provide an estimate of ozone pollution, BME also estimates a variance, which can be used to assess estimation confidence at different locations.

In short, the steps are:

1. Let  $\mathbf{Z}(\mathbf{p})$  be a field of ozone concentration estimations in space and time and let  $\mathbf{mo}(\mathbf{p})$  be the M<sup>3</sup>Fusion model output values in space and time.
2. Subtract the M<sup>3</sup>Fusion model output values at each measure point from the observed values,  $\mathbf{z}(\mathbf{p})$ , to obtain residuals  $\mathbf{x}(\mathbf{p}) = \mathbf{z}(\mathbf{p}) - \mathbf{mo}(\mathbf{p})$ . Examples for 2005 of  $\mathbf{z}$  and  $\mathbf{x}$  are shown below on the left and right, respectively:

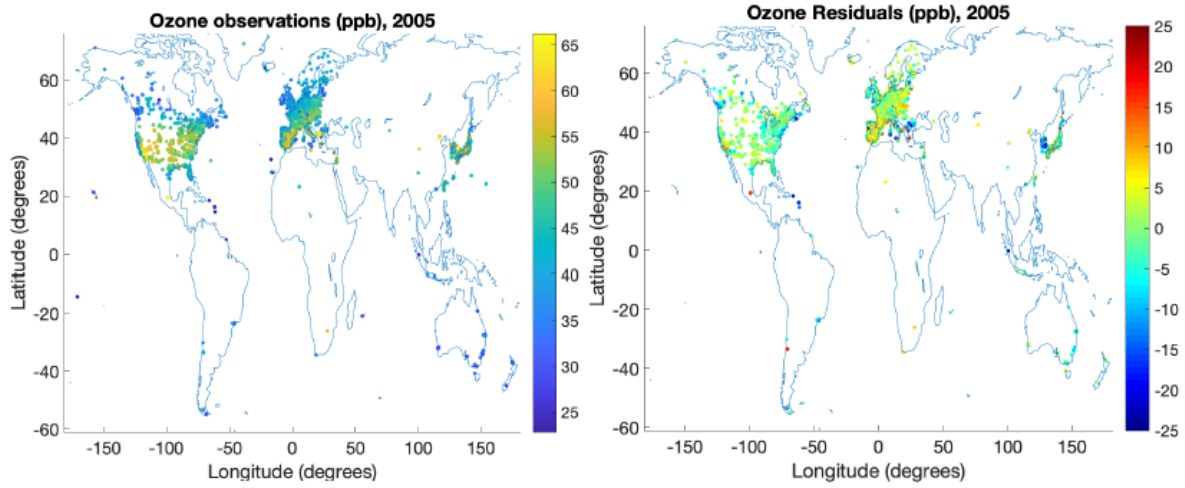

3. Model the covariance (the correlation between locations in space and time)  $c_x$  based on the residuals  $x$ . The covariance of the residuals is the range of influence of a measurement to predict other concentrations in space and time. A shallower curve indicates that ozone values are correlated over a greater distance, while a steep dropoff indicates the reverse. The modelled spatial and temporal covariance are displayed below with the corresponding equation:

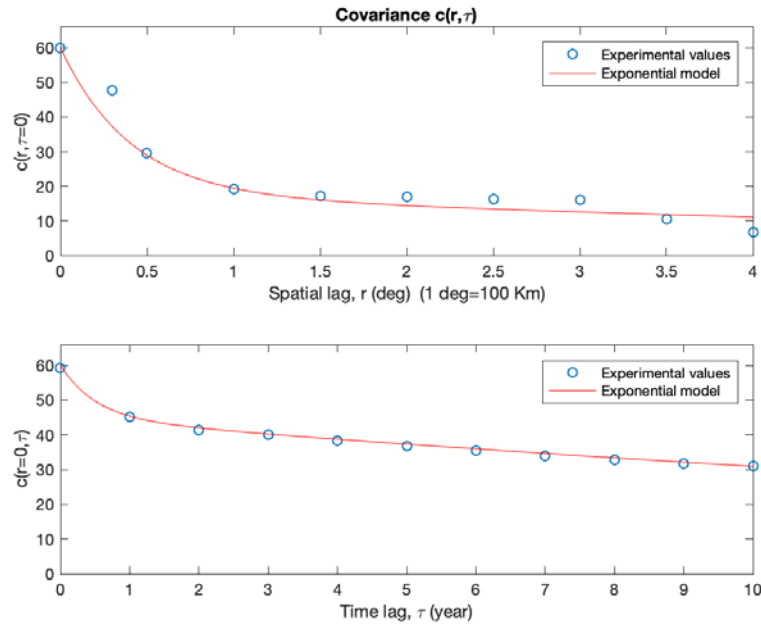

$$C_x(r, \tau) = 59.9938 \text{ ppb}^2 \left( 0.7 \exp\left(-\frac{3r}{1.2 \text{ degrees}}\right) \exp\left(-\frac{3\tau}{80 \text{ years}}\right) + 0.05 \exp\left(-\frac{3r}{25 \text{ degrees}}\right) \exp\left(-\frac{3\tau}{80 \text{ years}}\right) + 0.25 \exp\left(-\frac{3r}{25 \text{ degrees}}\right) \exp\left(-\frac{3\tau}{1.5 \text{ years}}\right) \right)$$

Where  $\tau$  is temporal distance and  $r$  is spatial distance

Note that the spatial covariance drops off steeply spatially such that the influence of a measurement location becomes very small beyond 1 degree of distance. However, the temporal covariance remains high, meaning that observations can influence ozone estimates through time over several years.

4. Combine the observation data residuals ( $\mathbf{x}$ ), covariance ( $\mathbf{cx}$ ), and estimation parameters to get the BME estimation ( $\mathbf{xk}$ ) and variance ( $\mathbf{vk}$ ) on a  $0.5^\circ$  by  $0.5^\circ$  grid, shown for 2005.

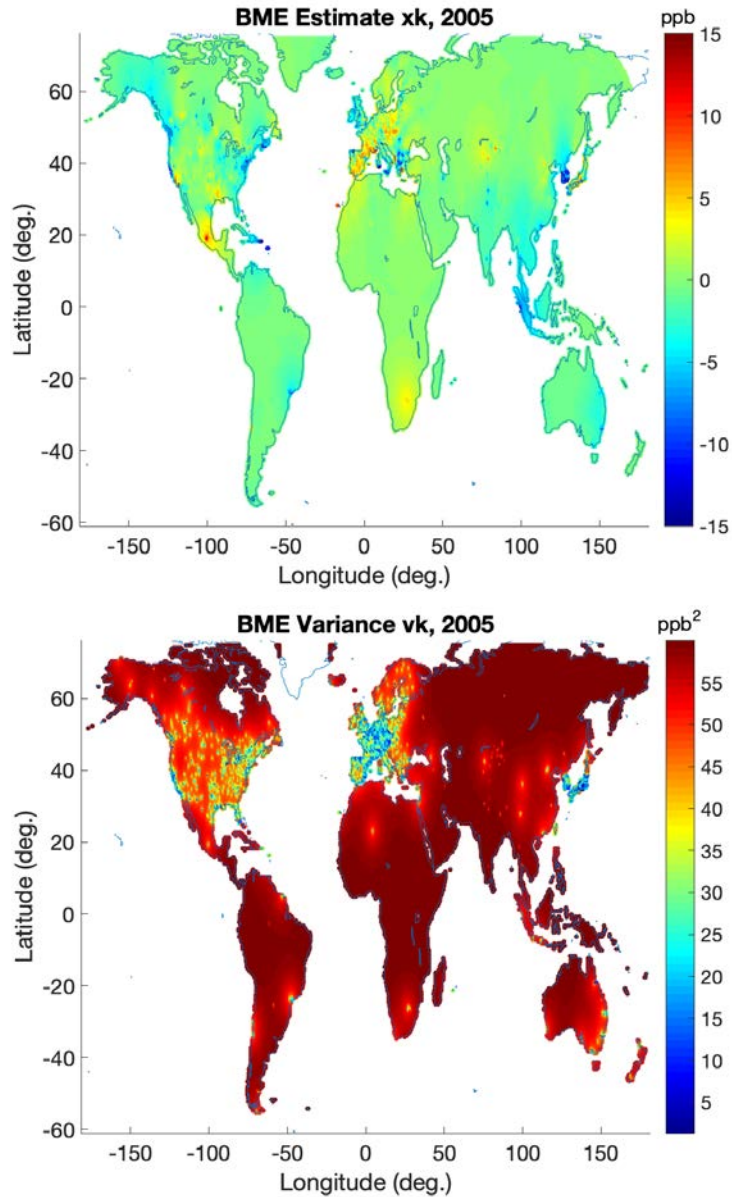

The variance is zero where the location of the estimation point matches an observation point in that year. The variance increases as the space-time distance from an observation increases, until the variance reaches a maximum value equal to the sill of the covariance equation (59.9938 ppb²).

5. Obtain final BME estimation values ( $\mathbf{z}_k$ ), shown for 2005 in the figure below, by adding back the previously subtracted model values  $\mathbf{mo}(\mathbf{p}_k)$  to the BME estimation ( $\mathbf{x}_k$ ).

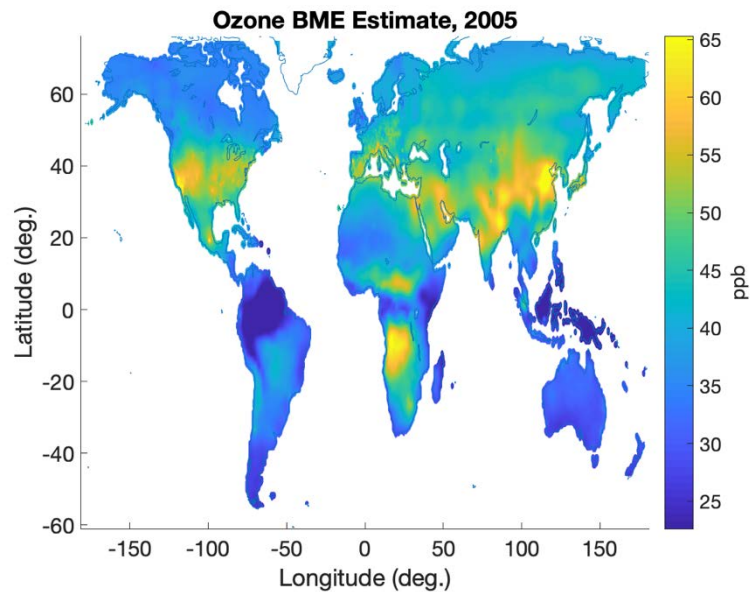

### ***Adding fine resolution***

Our results were calculated at 0.5° resolution, so to downscale estimates at finer resolution, we used the NASA G5NR-Chem model. The NASA G5NR-Chem model simulates surface ozone concentrations at 0.125° by 0.125° resolution for July 2013 to June 2014 (Hu and colleagues, 2018). We regridded the G5NR-Chem model from 0.125° resolution to 0.1° resolution. While we do not expect that the raw values for 2013–2014 hold true for every year, we believe that the spatial distribution of this model can be used to inform the fine-scale spatial pattern for each year. To add fine resolution, we performed the following steps:

1. Regrid NASA G5NR-Chem from 0.125° resolution to 0.1° resolution
2. Average each 0.5° NASA G5NR-Chem grid cell
3. Calculate the difference between our BME estimation results at 0.5° and the average NASA G5NR-Chem at 0.5°
4. Add the calculated difference to NASA G5NR-Chem at 0.1° to obtain our BME estimation at 0.1°

Adding fine resolution to our results keeps the average of each 0.5° grid cell the same as the original estimation at 0.5°, as well as the global average.

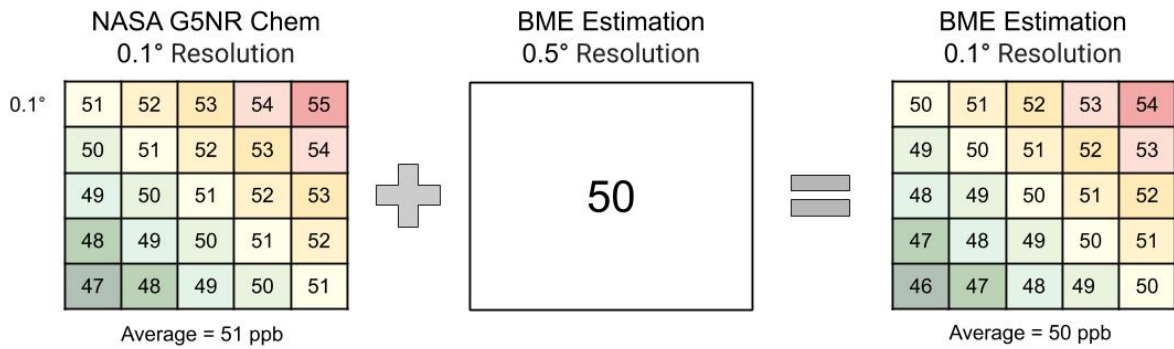

### **Final output**

Three years are shown as an example below: 1995, 2005, and 2015. For each year, there are five maps displayed: the observations, M<sup>3</sup>Fusion Model, BME Estimate, the difference between the BME Estimate and the M<sup>3</sup>Fusion Model, and the variance. The difference map shows that the BME method corrects the M<sup>3</sup>Fusion Model near monitoring stations, including stations in other years.

1995

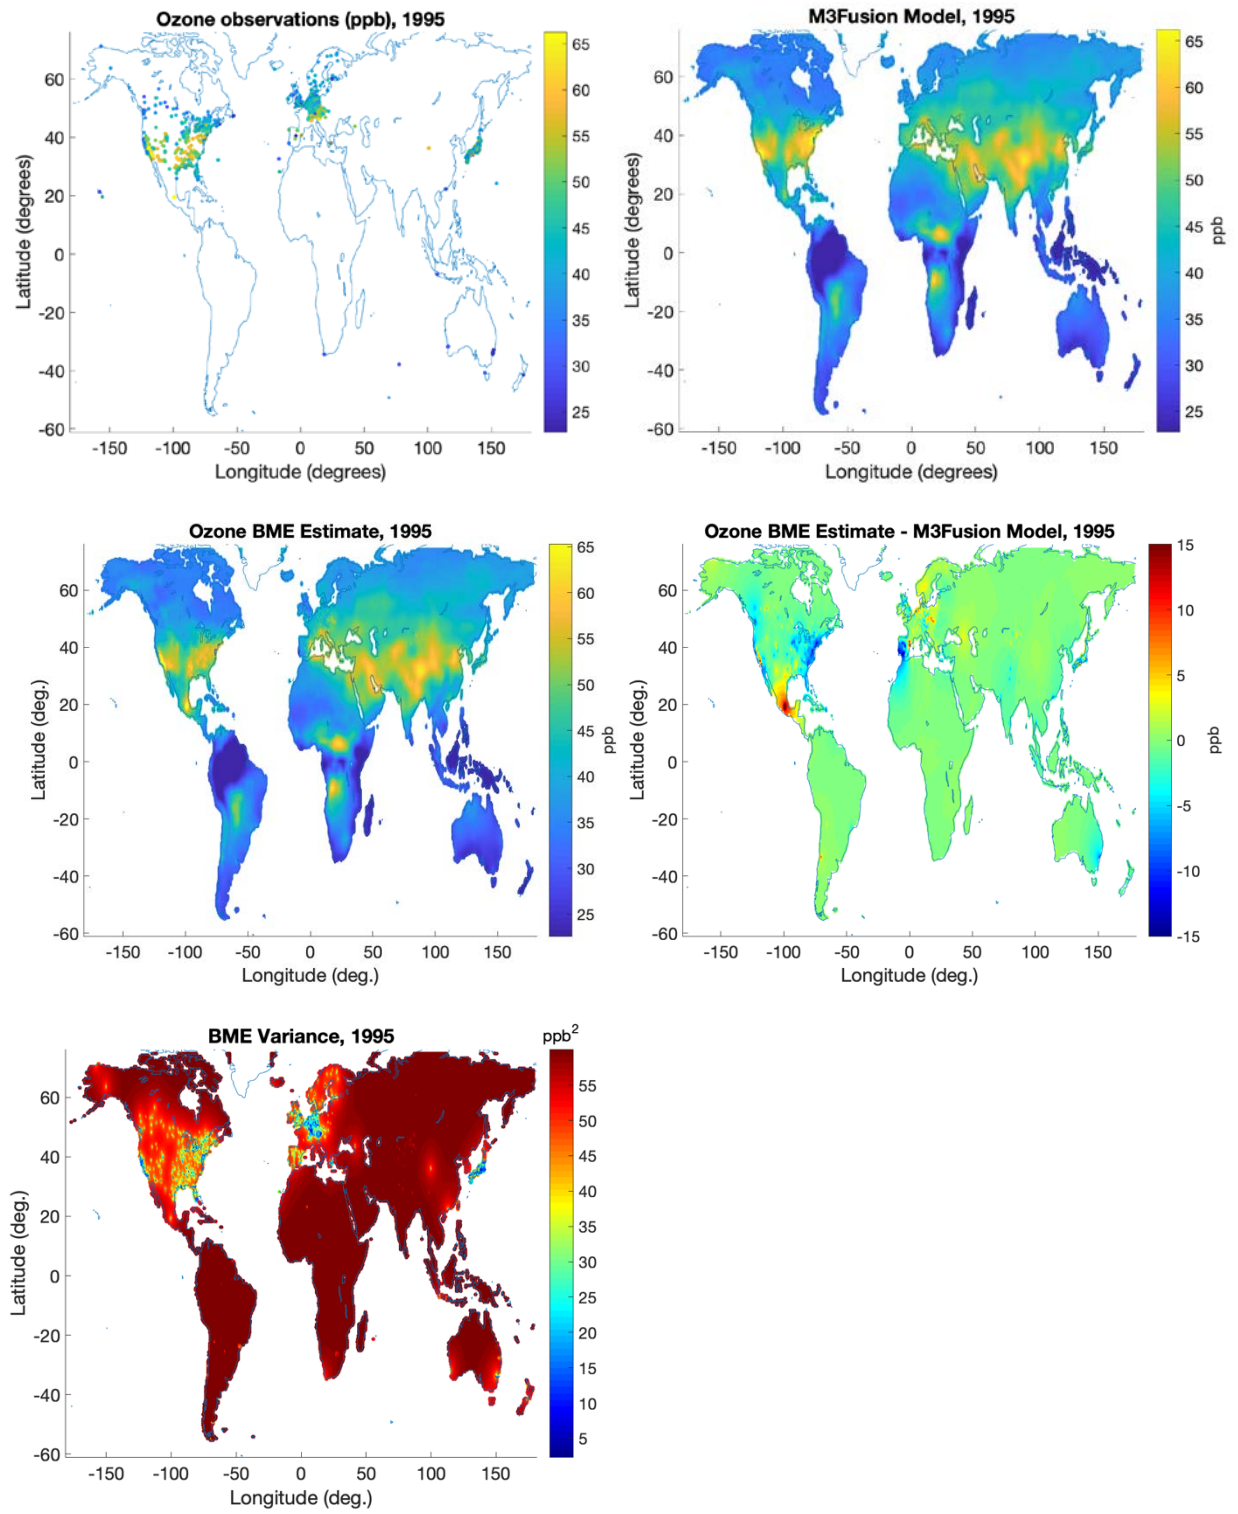

2005

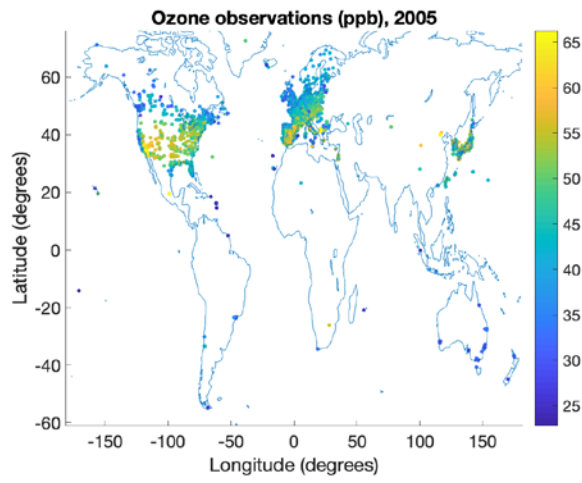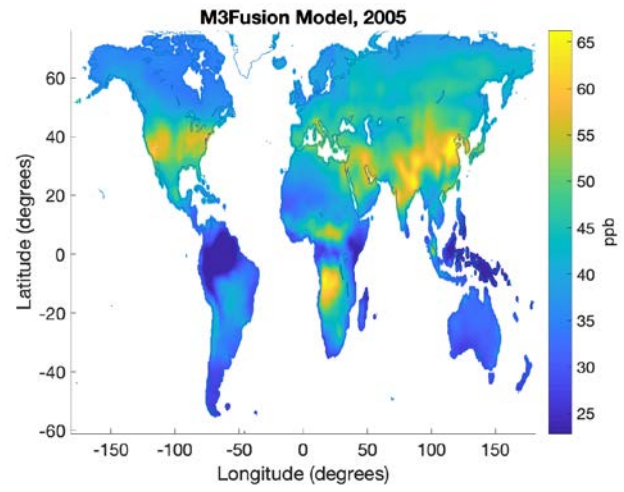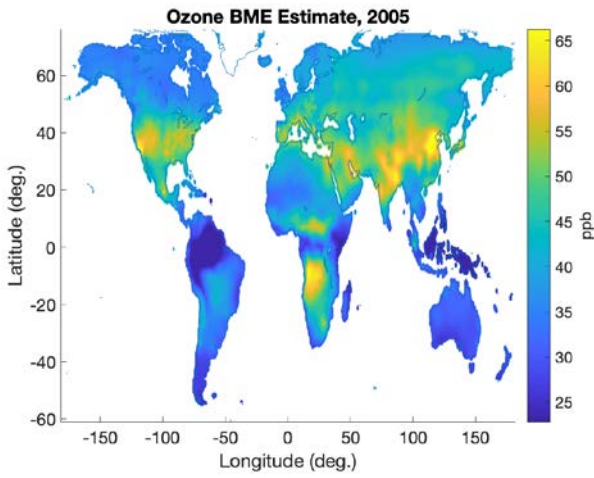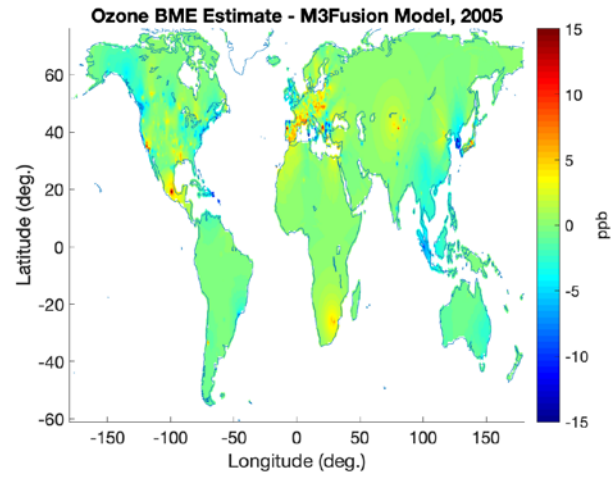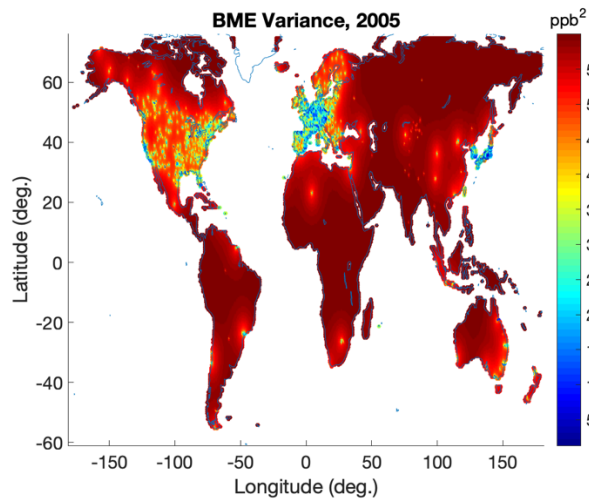

2015

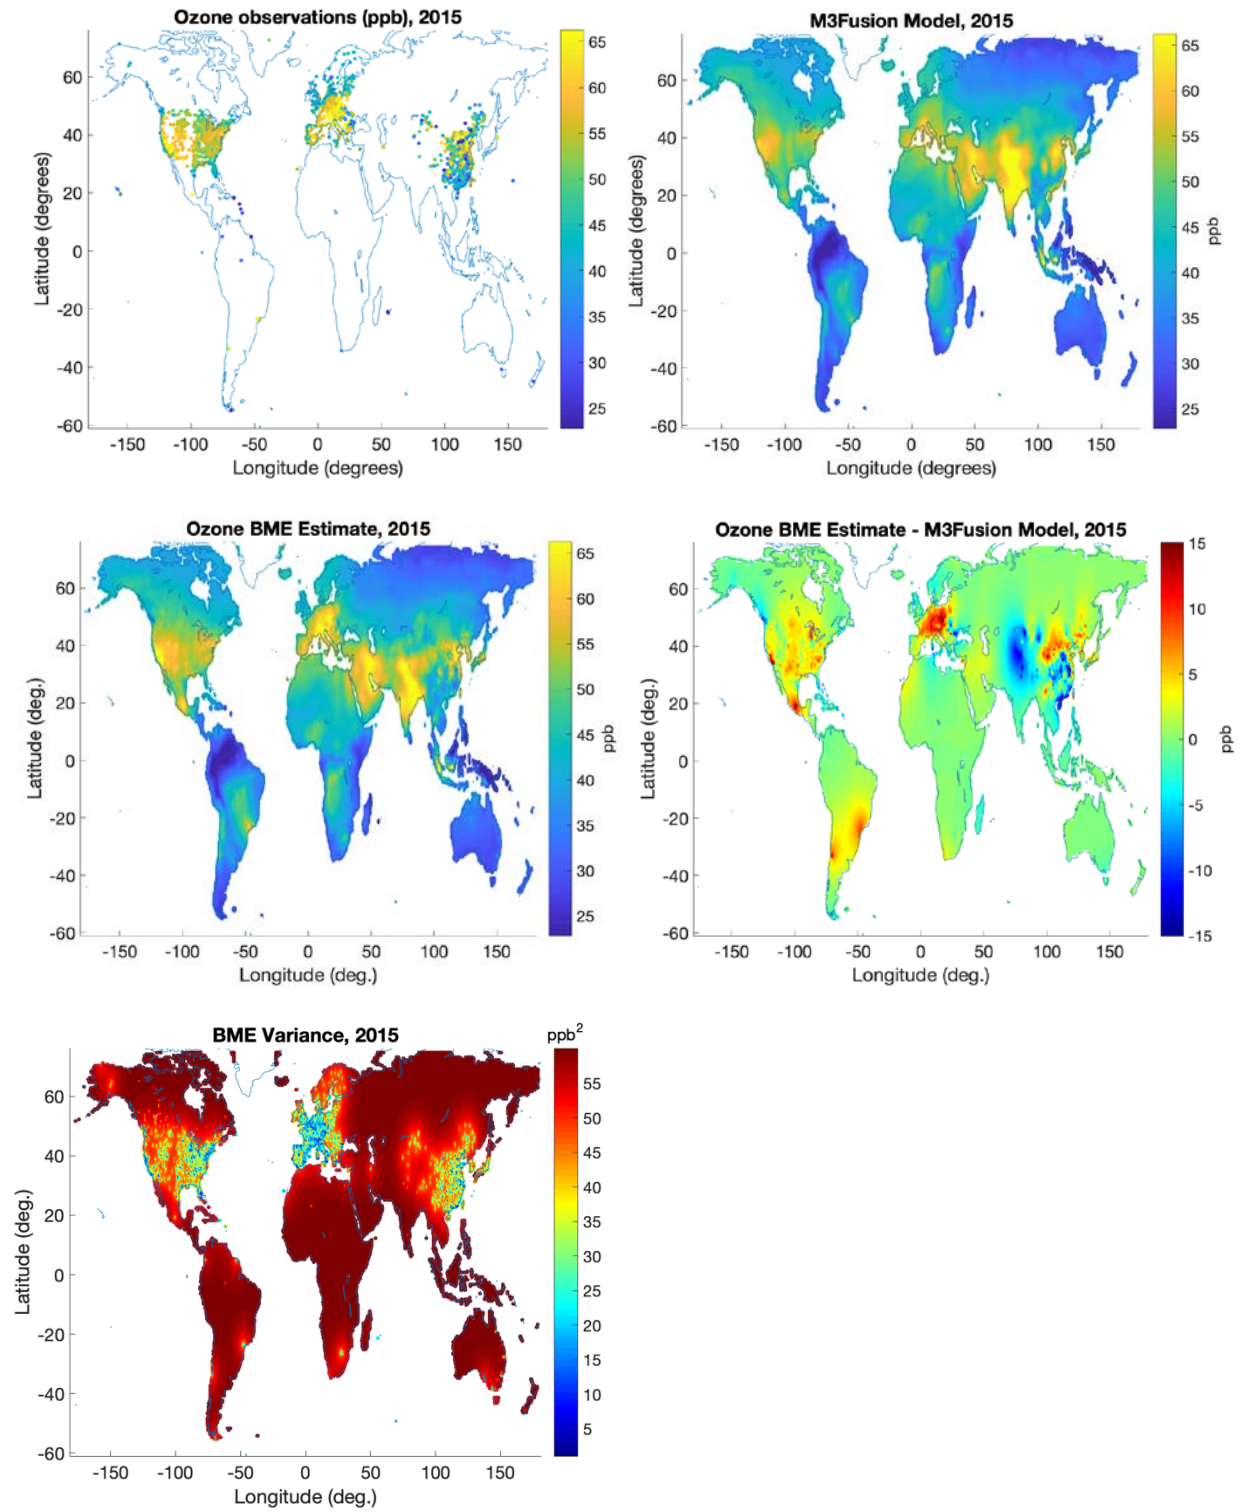

### ***Extrapolation and annual means***

To estimate global ozone in 2018 and 2019, for each 0.1° grid cell, we ran a log-linear model of the ozone estimates on year for the most recent ten years (2008–2017) of the following form:

$$\log(\text{ozone}) \sim \text{year}+1.$$

We considered using splines, but due to annual variation of ozone, we found a log-linear trend to provide the most reasonable prediction.

For burden estimation we are more interested in long-term trends and effects than annual variation; therefore, for the years 1991–2016, we used a three-year mean of exposure centered on the year of interest. This strategy aligns with the methodology used for ambient particulate matter air pollution. For 1990 and 2017, we used two-year means (1990/1991 and 2016/2017, respectively) because 1989 and 2018 were not available in the estimates.

To estimate the variance for the three-year mean to generate confidence intervals, we did not have information on the covariance between years, so a conservative estimate of the variance was made:

Let  $X$ ,  $Y$ , and  $Z$  be random variables describing ozone exposure in a given 0.1 degree grid cell for years  $i-1$ ,  $i$ , and  $i+1$ , respectively. By the laws of variance,

$$\text{Var}\left(\frac{1}{3}(X + Y + Z)\right) = \frac{1}{9}(\text{Var}(X) + \text{Var}(Y) + \text{Var}(Z) + 2\text{Cov}(X, Y) + 2\text{Cov}(X, Z) + 2\text{Cov}(Y, Z)).$$

We do not know the covariance, but by the Cauchy-Schwartz inequality,

$$\text{Cov}(A, B) \leq \sqrt{\text{Var}(A) * \text{Var}(B)}.$$

Therefore,

$$\text{Var}\left(\frac{1}{3}(X + Y + Z)\right) \leq \frac{1}{9}\left(\text{Var}(X) + \text{Var}(Y) + \text{Var}(Z) + 2\sqrt{\text{Var}(X) * \text{Var}(Y)} + 2\sqrt{\text{Var}(X) * \text{Var}(Z)} + 2\sqrt{\text{Var}(Y) * \text{Var}(Z)}\right).$$

This is a conservative estimate of the variance used when taking a three-year mean.

### ***Difference from previous estimations***

This method improves upon the GBD 2017 ozone exposure estimates (Chang and colleagues, 2019) in the following ways:

1. The previous estimates used observations in a specific year to correct the model within 2° of a monitoring station. In the current method, the radius of influence of each observation is defined by the spatial covariance. The spatial covariance shows that much of the influence of an observation is lost after 1°.
2. Measurements not only bias-correct the model in the year in which they were observed, but also influence other years according to the temporal covariance. This is important for regions that were not monitored over the entire 1990–2017 time period.
3. The fine spatial structure of the final product represents the spatial distribution of the 0.125° NASA G5NR-Chem model.

### Theoretical minimum-risk exposure level

As in GBD 2017, the TMREL is based on the exposure distribution from the ACS CPS-II study (Turner and colleagues, 2016). It is a uniform distribution around the minimum and fifth percentile values observed in the cohort,  $\sim U(29.1, 35.7)$ , in ppb.

### Relative risks

COPD mortality is the only included outcome for ambient ozone pollution.

In GBD 2017, we performed a literature review of studies examining long-term ozone exposure and COPD. We included five cohorts from Canada, the UK, and the USA, all of which reported ozone effects on COPD mortality (Turner and colleagues, 2016; Carey and colleagues, 2013, and Burnett RT. “Cox...”). For this reason, we only include mortality and not incidence as an outcome of ozone exposure. Table 2 summarizes relative risk input data.

**Table 2: Relative Risk Input Data**

| Input data                    | Relative risk |
|-------------------------------|---------------|
| Source count (total)          | 5             |
| Number of countries with data | 3             |

In GBD 2019, we updated our methodology to use MR-BRT for the meta-analysis of relative risks. Because we had only five datapoints, we included no study-level covariates. We also included no priors. The inverse-variance weighted meta-analysis of the five cohorts provided an estimated relative risk of 1.06 (95% CI 1.03, 1.10) with an estimated gamma (including between study heterogeneity) of 0.004.

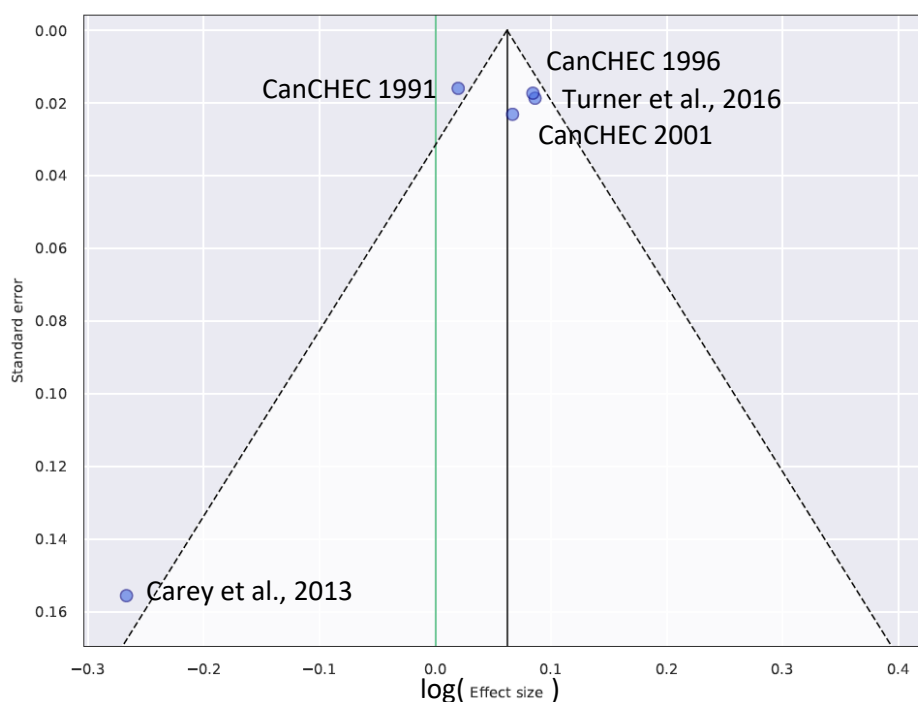

We calculated PAFs at the grid-cell level and aggregated up to GBD locations using population data from the Gridded Population of the World database. Estimates came from version 4 except for estimates for 1990 and 1995 from version 3. More details on these estimates are available in the Ambient particulate matter pollution methods appendix.

## References

1. Schultz MG, Schröder S, Lyapina O, Cooper O, Galbally I, Petropavlovskikh I, et al. Tropospheric Ozone Assessment Report: Database and Metrics Data of Global Surface Ozone Observations. *Elem Sci Anth*. 2017;5:58. DOI: <http://doi.org/10.1525/elementa.244>
2. Lu, Xiao, Jiayun Hong, Lin Zhang, Owen R. Cooper, Martin G. Schultz, Xiaobin Xu, Tao Wang, Meng Gao, Yuanhong Zhao, and Yuanhang Zhang. Severe surface ozone pollution in China: a global perspective. *Environmental Science & Technology Letters* 2018 5 (8), 487-49 DOI: 10.1021/acs.estlett.8b00366
3. Chang, Kai-Lan, R. Cooper, Owen, West, Jason, L. Serre, Marc, G. Schultz, Martin, Lin, Meiyun, Marecal, Virginie, Josse, B, Deushi, Makoto, Sudo, Kengo, Liu, Junhua & A. Keller, Christoph. (2019). A new method (M<sup>3</sup>Fusion v1) for combining observations and multiple model output for an improved estimate of the global surface ozone distribution. *Geoscientific Model Development*. 12. 955-978. 10.5194/gmd-12-955-2019.
4. Hu, L., C. A. Keller, M. S. Long, T. Sherwen, B. Auer, A. Da Silva, J. E. Nielsen, S. Pawson, M. A. Thompson, A. L. Trayanov, K. R. Travis, S. K. Grange, M. J. Evans, D. J. Jacob (2018) Global simulation of tropospheric chemistry at 12.5 km resolution: performance and evaluation of the GEOS-Chem chemical module (v10-1) within the NASA GEOS Earth system model (GEOS-5 ESM), *Geoscientific Model Development*, 11, 4603-4620. 10.5194/gmd-11-4603-2018.
5. Morgenstern O, Hegglin MI, Rozanov E, O'Connor FM, Abraham NL, Akiyoshi H, Archibald AT, Bekki S, Butchart N, Chipperfield MP, Deushi M, Dhomse SS, Garcia RR, Hardiman SC, Horowitz LW, Jockel P, Josse B, Kinnison D, Lin M, Mancini E, Manyin ME, Marchand M, Marecal V, Michou M, Oman LD, Pitari G, Plummer DA, Revell LE, Saint-Martin D, Schofield R, Stenke A, Stone K, Sudo K, Tanaka TY, Tilmes S, Yamashita Y, Yoshida K, Zeng G. Review of the global models used within phase 1 of the Chemistry-Climate Model Initiative (CCMI). *Geosci. Model Dev*. 2017; 10: 639-671.
6. Turner MC, Jerrett M, Pope CA 3rd, Krewski D, Gapstur SM, Diver WR, Beckerman BS, Marshall JD, Su J, Crouse DL, Burnett RT. Long-term ozone exposure and mortality in a large prospective study. *Am J Respir Crit Care Med*. 2016; 193(10): 1134-42.
7. Carey IM, Atkinson RW, Kent AJ, van Staa T, Cook DG, Anderson HR. Mortality associations with long-term exposure to outdoor air pollution in a national English cohort. *Am J Respir Crit Care Med*. 2013; 187(11): 1226-33.
8. Burnett RT. Cox Proportional Survival Model Hazard Ratios from Census Years (1991,1996,2001) to 2011 for Adults Aged 25 to 89 in CanCHEC Cohort. Custom Analysis for GBD2017.

## References for Atmospheric Chemical Transport Models

- CESM:

- Tilmes, S., Lamarque, J.-F., Emmons, L. K., Kinnison, D. E., Ma, P.-L., Liu, X., Ghan, S., Bardeen, C., Arnold, S., Deeter, M., Vitt, F., Ryerson, T., Elkins, J. W., Moore, F., Spackman, J. R., and Val Martin, M.: Description and evaluation of tropospheric chemistry and aerosols in the Community Earth System Model (CESM1.2), *Geosci. Model Dev.*, 8, 1395–1426, doi:10.5194/gmd-8-1395-2015, 2015
- CESM WACCM:
  - Garcia, R. R., Smith, A. K., Kinnison, D. E., de la Cámara, Á., and Murphy, D.: Modifications of the gravity wave parameterization in the Whole Atmosphere Community Climate Model: Motivation and results, *J. Geophys. Res.-Atmos.*, doi:10.1175/JAS-D16-0104.1, 2016.
  - Marsh, D., Mills, M. J., Kinnison, D. E., Garcia, R. R., Lamarque, J.-F., and Calvo, N.: Climate change from 1850–2005 simulated in CESM1 (WACCM), *J. Climate*, 26, 7372–7391, doi:10.1175/JCLI-D-12-00558.1, 2013
- CHASER:
  - Sudo, K., Takahashi, M., and Akimoto, H.: CHASER: A global chemical model of the troposphere, 2. Model results and evaluation, *J. Geophys. Res.*, 107, 4586, <https://doi.org/10.1029/2001JD001114>, 2002a.
  - Sudo, K., Takahashi, M., Kurokawa, J., and Akimoto, H.: CHASER: A global chemical model of the troposphere, 1. Model description, *J. Geophys. Res.*, 107, 4339, <https://doi.org/10.1029/2001JD001113>, 2002b.
  - Watanabe, S., Hajima, T., Sudo, K., Nagashima, T., Takemura, T., Okajima, H., Nozawa, T., Kawase, H., Abe, M., Yokohata, T., Ise, T., Sato, H., Kato, E., Takata, K., Emori, S., and Kawamiya, M.: MIROC-ESM 2010: model description and basic results of CMIP5-20c3m experiments, *Geosci. Model Dev.*, 4, 845–872, <https://doi.org/10.5194/gmd-4-845-2011>, 2011.
- GEOSCCM:
  - Oman, L. D., Ziemke, J. R., Douglass, A. R., Waugh, D. W., Lang, C., Rodriguez, J. M., and Nielsen, J. E.: The response of tropical tropospheric ozone to ENSO, *Geophys. Res. Lett.*, 38, L13706, <https://doi.org/10.1029/2011GL047865>, 2011.
- GFDL AM3 & AM4:
  - Lin, M., Fiore, A. M., Horowitz, L. W., Cooper, O. R., Naik, V., Holloway, J., Johnson, B. J., Middlebrook, A. M., Oltmans, S. J., Pollack, I. B., Ryerson, T. B., Warner, J. X., Wiedinmyer, C., Wilson, J., and Wyman, B.: Transport of Asian ozone pollution into surface air over the western United States in spring, *J. Geophys. Res.*, 117, D00V07, <https://doi.org/10.1029/2011JD016961>, 2012.
  - Lin, M., Horowitz, L. W., Oltmans, S. J., Fiore, A. M., and Fan, S.: Tropospheric ozone trends at Mauna Loa Observatory tied to decadal climate variability, *Nat. Geosci.*, 7, 136–143, <https://doi.org/10.1038/NGEO2066>, 2014.
  - Lin, M., Horowitz, L. W., Payton, R., Fiore, A. M., and Tonnesen, G.: US surface ozone trends and extremes from 1980 to 2014: quantifying the roles of rising Asian emissions, domestic controls, wildfires, and climate, *Atmos. Chem. Phys.*, 17, 2943–2970, <https://doi.org/10.5194/acp-17-2943-2017>, 2017.
- MERRA GMI:

- Ziemke, J. R., Oman, L. D., Strode, S. A., Douglass, A. R., Olsen, M. A., McPeters, R. D., Bhartia, P. K., Froidevaux, L., Labow, G. J., Witte, J. C., Thompson, A. M., Haffner, D. P., Kramarova, N. A., Frith, S. M., Huang, L.-K., Jaross, G. R., Seftor, C. J., Deland, M. T., and Taylor, S. L.: Trends in global tropospheric ozone inferred from a composite record of TOMS/OMI/MLS/OMPS satellite measurements and the MERRA-2 GMI simulation , *Atmos. Chem. Phys.*, 19, 3257–3269, <https://doi.org/10.5194/acp-19-3257-2019>, 2019.
- MOCAGE:
  - Josse, B., Simon, P., and Peuch, V.-H.: Radon global simulations with the multiscale chemistry and transport model MOCAGE, *Tellus B*, 56, 339–356, <https://doi.org/10.1111/j.1600-0889.2004.00112.x>, 2004.
  - Teyssède, H., Michou, M., Clark, H. L., Josse, B., Karcher, F., Olivié, D., Peuch, V.-H., Saint-Martin, D., Cariolle, D., Attié, J.-L., Nédélec, P., Ricaud, P., Thouret, V., van der A, R. J., Volz-Thomas, A., and Chéroux, F.: A new tropospheric and stratospheric Chemistry and Transport Model MOCAGE-Climat for multi-year studies: evaluation of the present-day climatology and sensitivity to surface processes, *Atmos. Chem. Phys.*, 7, 5815–5860, <https://doi.org/10.5194/acp-7-5815-2007>, 2007.
- MRI-ESM1r1:
  - Adachi, Y., Yukimoto, S., Deushi, M., Obata, A., Taichu, Y., Tanaka, H. N., Hosaka, M., Sakami, T., Yoshimura, H., Hirabara, M., Shindo, E., Tsujino, H., Mizuta, R., Yabu, S., Koshiro, T., Ose, T., and Kitoh, A.: Basic performance of a new earth system model of the Meteorological Research Institute (MRI-ESM1), *Pap. Meteorol. Geophys.*, 64, 1–18, <https://doi.org/10.2467/mripapers.64.1>, 2013.

#### Contributors:

- Marissa DeLang, Jacob S. Becker, Stephanie Cleland, Elyssa Collins, Marc L. Serre, J. Jason West, University of North Carolina at Chapel Hill
- Owen R. Cooper and Kai-Lan Chang, CIRES, University of Colorado, Boulder/NOAA Earth System Research Laboratory, Boulder, USA
- Martin G. Schultz and Sabine Schröder, Jülich Supercomputing Centre (JSC), Forschungszentrum Jülich, Jülich, DE
- Xiao Lu and Lin Zhang, Laboratory for Climate and Ocean-Atmosphere Studies, Dept. of Atmospheric and Oceanic Sciences, School of Physics, Peking University, Beijing, China
- CCMI and NASA modellers

# Household air pollution

## Flowchart

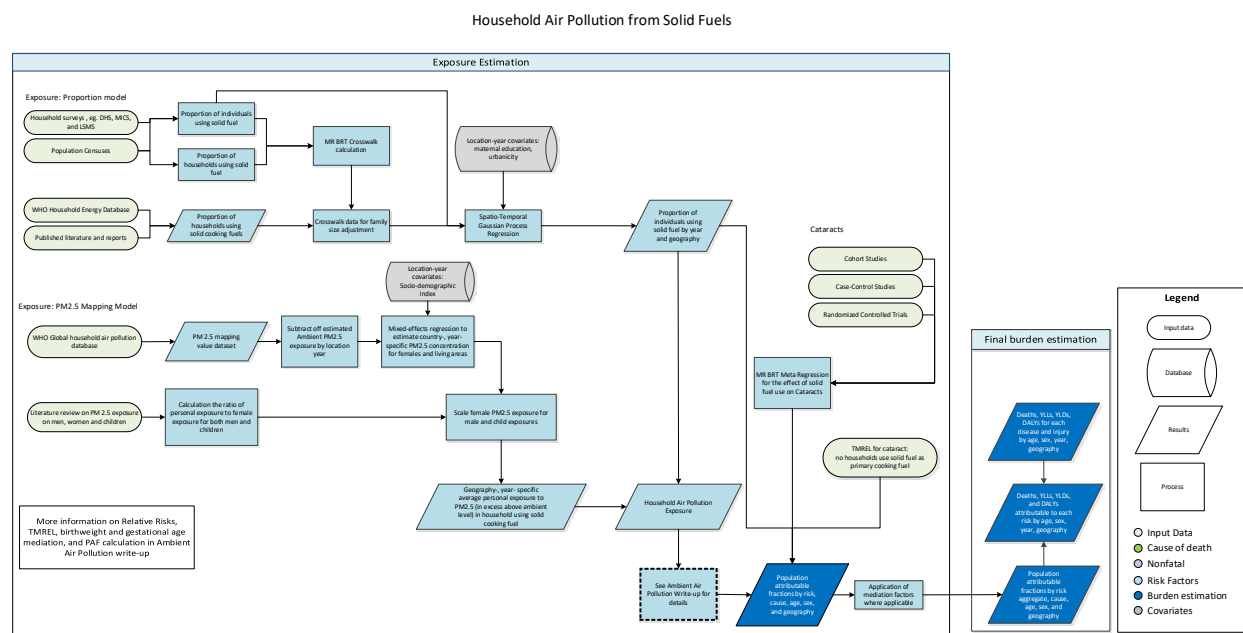

## Input data and methodological summary

### Exposure

#### Case definition

Exposure to household air pollution from solid fuels (HAP) is estimated from both the proportion of individuals using solid cooking fuels and the level of PM<sub>2.5</sub> air pollution exposure for these individuals. Solid fuels in our analysis include coal, wood, charcoal, dung, and agricultural residues.

#### Input data

We extracted information on use of solid fuels from the standard multi-country survey series such as Demographic and Health Surveys (DHS), Living Standards Measurement Surveys (LSMS), Multiple Indicator Cluster Surveys (MICS), and World Health Surveys (WHS), as well as censuses and country-specific survey series such as Kenya Welfare Monitoring Survey and South Africa General Household Survey. To fill the gaps of data in surveys and censuses, we also downloaded and updated estimates from WHO Energy Database and extracted from literature through systematic review. Each nationally or subnationally representative datapoint provided an estimate for the percentage of households using solid cooking fuels. We used studies from 1980 to 2019 to inform the time series.

We also excluded sources that did not distinguish specific primary fuel types, estimated fuel used for purposes other than cooking (eg, lighting or heating), failed to report standard error or sample size, had over 15% of households with missing responses, reported fuel use in physical units, or were secondary sources referencing primary analyses. Table 1 summarizes exposure input data.

**Table 1: Exposure Input Data**

| Input data                    | Exposure |
|-------------------------------|----------|
| Source count (total)          | 1680     |
| Number of countries with data | 195      |

**Family size crosswalk**

Many estimates in the WHO Energy Database and other reports quantify the proportion of households using solid fuel for cooking; however, we are interested in the proportion of individuals using solid fuel for cooking. To crosswalk these estimates, whenever we had the available information, we extracted fuel use at both the individual and household levels. We included 3676 source-specific pairs in the MR-BRT crosswalk model.

**MR-BRT crosswalk adjustment factors for household air pollution exposure**

| Data input                | Reference or alternative case definition | Gamma | Beta coefficient, logit (95% CI) |
|---------------------------|------------------------------------------|-------|----------------------------------|
| Proportion of individuals | Ref                                      | 0.097 | ---                              |
| Proportion of Households  | Alt                                      |       | -0.095<br>(-0.100, -0.090)       |

We then apply this coefficient to household-only reports with the following formula:

$prop_{indiv}$  = the proportion of individuals using solid fuel for cooking, and

$prop_{hh}$  = the proportion of households using solid fuel for cooking.

$$\log\left(\frac{prop_{indiv}}{1 - prop_{indiv}}\right) = \log\left(\frac{prop_{hh}}{1 - prop_{hh}}\right) - \beta$$

or

$$prop_{indiv} = \frac{prop_{hh} * e^{-\beta}}{1 - prop_{hh} + prop_{hh} * e^{-\beta}}$$

The effect is that the household studies are inflated to account for bias. Larger households are more likely to use solid fuel for cooking. The following figure depicts the 3676 data points that informed the crosswalk model. There the red points indicate the 10% of studies that were trimmed as outliers.

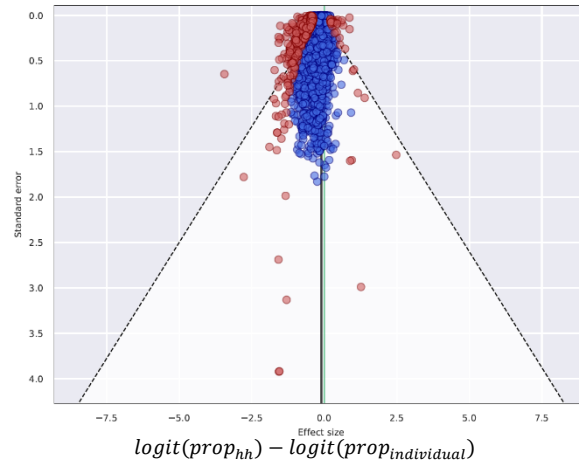

### Modelling strategy

Household air pollution was modelled at individual level using a three-step modelling strategy that uses linear regression, spatiotemporal regression, and Gaussian process regression (GPR). The first step is a mixed-effect linear regression of logit-transformed proportion of individuals using solid cooking fuels. The linear model contains maternal education and the proportion of population living in urban areas as covariates and has nested random effects by GBD region and GBD super-region. The full ST-GPR process is specified elsewhere in this appendix. No substantial modelling changes were made in this round compared to GBD 2017.

### First-stage linear model and coefficients

$$\text{logit}(\text{proportion}) \sim \text{maternal education} + \text{urbanicity} + (1|\text{region}) + (1|\text{super} - \text{region})$$

| Variable                                                    | Beta (95% CI)        |
|-------------------------------------------------------------|----------------------|
| Intercept                                                   | 3.16 (1.59, 4.74)    |
| Maternal education (years per capita)                       | -0.45 (-0.76, -0.15) |
| Urbanicity (proportion of population living in urban areas) | -1.42 (-2.67, -0.17) |

### Theoretical minimum-risk exposure level

For cataract, the TMREL is defined as no households using solid cooking fuel. For outcomes related to both ambient and household air pollution, the PAFs are estimated jointly and the TMREL is defined as uniform distribution between 2.4 and 5.9  $\mu\text{g}/\text{m}^3$   $\text{PM}_{2.5}$ .

### Relative risks

In addition to the previously included outcomes of lower respiratory infections (LRI), stroke, ischaemic heart disease (IHD), chronic obstructive pulmonary disease (COPD), lung cancer, type 2 diabetes, and cataract, in GBD 2019 we added low birthweight and short gestation as new outcomes of household air pollution through a mediation analyses. With the exception of cataract, all causes share risk curves and are jointly calculated with ambient  $\text{PM}_{2.5}$  air pollution. Table 2 summarizes relative risk input data for ambient particulate matter pollution and household air pollution.

**Table 2: Relative Risk Input Data**

| Input data                    | Relative risk |
|-------------------------------|---------------|
| Source count (total)          | 200           |
| Number of countries with data | 40            |

Prior to GBD 2019, we utilised the results of an external meta-analysis with a summary relative of 2.47 with 95% CI (1.63, 3.73).<sup>1</sup> While this effect estimate was for both sexes, in the past we estimated burden for women only because women are known to have higher HAP exposure than men. In GBD 2019, we performed our own meta-regression analysis of household air pollution and cataracts. We extracted all of the components studies of the above meta-analysis paper but excluded one cross-sectional study. GBD risk factor analyses typically do not include cross-sectional analyses. In additional literature search, we found one additional paper describing different fuel types and cataracts.<sup>4</sup> We excluded this study because there was no comparison group without solid fuel use. Our resulting dataset contained eight estimates from six sources in India and Nepal.

On these eight estimates, we ran a MR BRT meta-regression to generate a summary effect size of 2.51 (1.58, 3.96). We included a study-level bias covariate of whether or not the study participants were blind to the exposure-outcome pair of interest. The prior on this covariate was a Gaussian distribution with mean 0 and variance 0.1. The prior on gamma was a Gaussian distribution with mean 0.04 and 0.1. The table and figure below provide the model coefficients and a visual representation.

**MR-BRT relative risk meta-analysis for household air pollution and cataract**

| Covariate         | Gamma | Beta coefficient, logit (95% CI) | Beta coefficient, adjusted (95% CI) |
|-------------------|-------|----------------------------------|-------------------------------------|
| Intercept         | 0.40  | 0.918 (0.460, 1.377)             | 2.51 (1.58, 3.96)                   |
| Outcome unblinded |       | 0.031 (-0.450, 0.512)            | 1.03 (0.64, 1.67)                   |

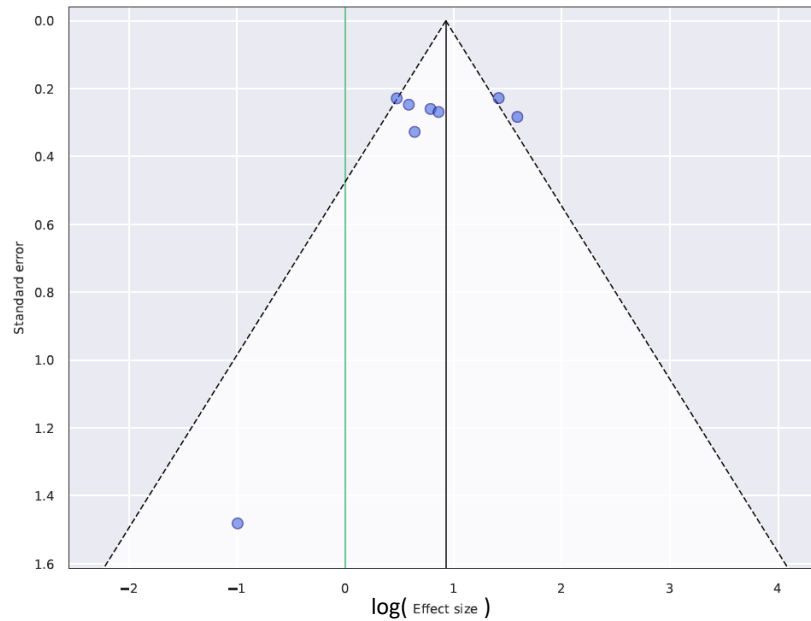

Studies reported effect sizes for males, females, and/or both sexes. In a sensitivity analysis we included a covariate for sex and found no significant difference in effect size by sex. Therefore, we now estimate cataract as an outcome of household air pollution in both males and females.

In GBD 2019, we also made substantial changes to our particulate matter risk curves. These risk curves, utilising splines in MR-BRT, the new mediation analysis with birthweight and gestational age, and the joint-estimation PAF approach are described in the ambient particulate matter appendix.

### ***PM<sub>2.5</sub> mapping value***

In order to use the particulate matter risk curves, we must estimate the level of exposure to particulate matter with diameter of less than 2.5 micrometers (PM<sub>2.5</sub>) for individuals using solid fuels for cooking. The Global Household Air Pollution (HAP) Measurements database from WHO contains 196 studies with measurements from 43 countries of various pollution metrics in households using solid fuel for cooking.<sup>2</sup> From this database, we take all measurements of PM<sub>2.5</sub> using indoor or personal monitors. In addition to the WHO database, we included eight additional studies from a systematic review conducted in 2015 for GBD.

The final dataset included 336 estimates from 75 studies in 43 unique locations. We included 260, 64, nine, and three measurements indoors, on personal monitors for females, children (under 5), and males, respectively. 274 estimates were in households using solid fuels, 47 in households only using clean (gas or electricity) fuels, and 15 in households using a mixture of solid and clean fuels.

We use the following model:

$$\log(\text{excess PM}) \sim \text{solid} + \text{measure group} + 24 \text{ hr measurement} + \text{SDI} + (1|\text{study})$$

Where,

- 24-hour measurement: binary variable equal to 1 if the measurement occurred over at least a 24-hour period and not only during mealtimes
- Measure group: categorical variable indicating indoor, female, male, or children

- Solid: indicator variable equal to 1 if the measurements were among households using solid fuel only, 0.5 if the measurements represented a mix of clean and solid fuels, and 0 if the households only used clean fuels.

We also included the Socio-demographic Index (SDI) as a variable to predict a unique value of HAP for each location and year based on development. We also included a random effect on study. We weighted each study by its sample size.

Before modelling, we calculated the excess particulate matter in households using solid fuel by subtracting off the predicted ambient PM<sub>2.5</sub> value in the study location and year based on the GBD 2017 PM<sub>2.5</sub> exposure model. The final model coefficients are included below:

#### ***HAP mapping model and coefficients***

| Variable            | Beta, log (95% CI)   | Beta, adjusted (95% CI)       |
|---------------------|----------------------|-------------------------------|
| Intercept           | 6.23 (4.58, 7.88)    | 506 (97, 2635)                |
| Solid               | 2.60 (2.06, 3.13)    | 13.4 (7.8, 23.0)              |
| Measure group       |                      |                               |
| • Indoor (ref)      |                      |                               |
| • Female            | -0.56 (-1.15, 0.04)  | 0.57 (0.32, 1.04)             |
| • Male              | -1.56 (-3.81, 0.70)  | 0.21 (0.02, 2.02)             |
| • Child             | -1.13 (-2.06, -0.20) | 0.32 (0.13, 0.82)             |
| 24-hour measurement | -0.29 (-1.04, 0.46)  | 0.75 (0.35, 1.59)             |
| SDI                 | -6.42 (-9.30, -3.54) | 1.6 e -3 (9.1 e -5, 2.9 e -2) |

Therefore, for females in households using solid fuel, we would expect their long-term mean excess PM<sub>2.5</sub> exposure due to the use of solid fuels to be 1522, 117, and 9 µg/m<sup>3</sup> in SDI of 0.1, 0.5, and 0.9, respectively.

Because there are so few studies of personal monitoring in men and children, rather than directly using the results of the model, we generated ratios using studies that measured at least two of the population groups for any size particulate matter. For PM<sub>2.5</sub> we used the predicted ambient PM<sub>2.5</sub> value in the study location and year based on the GBD 2017 PM<sub>2.5</sub> exposure model as the “outdoor” measurement, and for PM<sub>4</sub> and PM<sub>10</sub> we used published values in the studies themselves. We first subtracted off this outdoor value from each PM measurement, and then calculated the ratio of male to female and child to female exposure, weighted by sample size.

| Study                     | Location              | Year | Pollutant         | Female N | Female PM | Group | N   | PM  | Outdoor |
|---------------------------|-----------------------|------|-------------------|----------|-----------|-------|-----|-----|---------|
| Balakrishnan et al., 2004 | Andhra Pradesh, Rural | 2004 | PM <sub>4</sub>   | 591      | 352       | male  | 503 | 187 | 94      |
| Gao X et al., 2009.       | Tibet                 | 2009 | PM <sub>2.5</sub> | 52       | 127       | male  | 85  | 111 | 27      |
| Dasgupta et al., 2006     | Bangladesh            | 2006 | PM <sub>10</sub>  | 944      | 209       | male  | 944 | 166 | 50      |
| Devkumar et al., 2014     | Nepal                 | 2014 | PM <sub>2.5</sub> | 405      | 169       | male  | 429 | 167 | 90      |
| Balakrishnan et al., 2004 | Andhra Pradesh, Rural | 2004 | PM <sub>4</sub>   | 591      | 352       | child | 56  | 262 | 94      |

|                        |            |      |                   |     |     |       |     |     |    |
|------------------------|------------|------|-------------------|-----|-----|-------|-----|-----|----|
| Dionisio et al., 2008. | The Gambia | 2008 | PM <sub>2.5</sub> | 13  | 275 | child | 13  | 219 | 31 |
| Dasgupta et al., 2006  | Bangladesh | 2006 | PM <sub>10</sub>  | 944 | 209 | child | 944 | 199 | 50 |

The final ratios were 0.64 95% CI (0.45, 0.91) for males and 0.85 95% CI (0.56, 1.31) for children. We used these results to scale the PM<sub>2.5</sub> mapping model for these age and sex groups to input into the PM<sub>2.5</sub> risk curves.

## References

1. Smith KR, Bruce N, Balakrishnan K, Adair-Rohani H, Balmes J, Chafe Z, *et al.* Millions Dead: How Do We Know and What Does It Mean? Methods Used in the Comparative Risk Assessment of Household Air Pollution. *Annu Rev Public Health.* 2014; **35**(1):185–206.
2. Shupler M, Balakrishnan K, Ghosh S, *et al.* Global household air pollution database: Kitchen concentrations and personal exposures of particulate matter and carbon monoxide. *Data in Brief* 2018; **21**: 1292–5.
3. Shupler M, Godwin W, Frostad J, Gustafson P, Arku RE, Brauer M. Global estimation of exposure to fine particulate matter (PM<sub>2.5</sub>) from household air pollution. *Environment International* 2018; **120**: 354–63.
4. Tanchangya J, Geater AF. Use of traditional cooking fuels and the risk of young adult cataract in rural Bangladesh: a hospital-based case-control study. *BMC Ophthalmology* 2011; **11**.

# Occupational risk factors

## Flowcharts

Occupational Risk Factors  
(except asbestos and injuries)

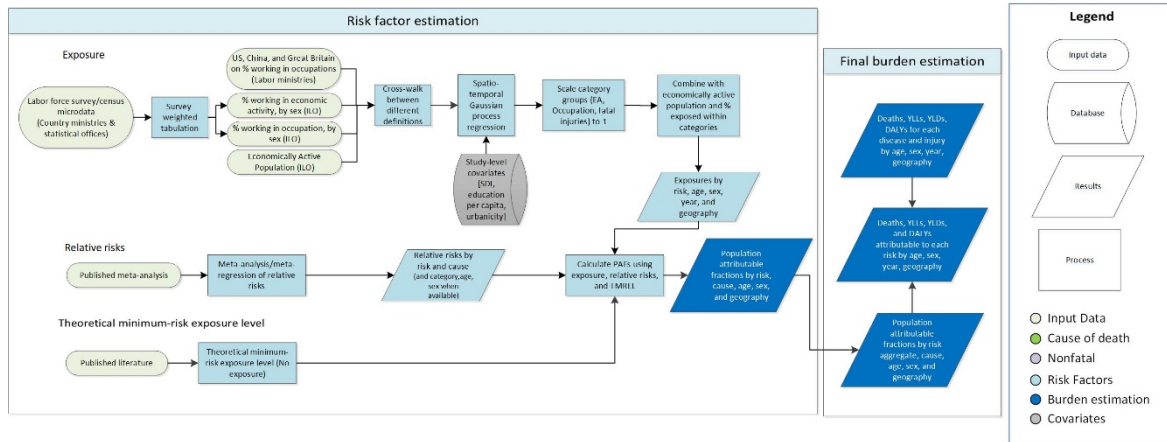

Occupational Risk Factors (Injuries)

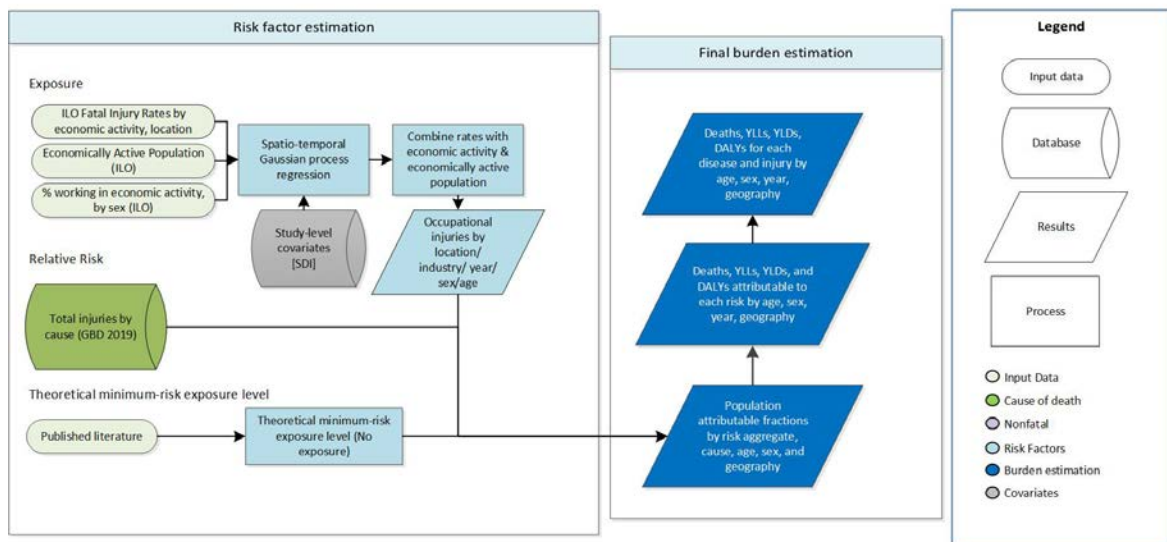

Occupational Risk Factors (asbestos)

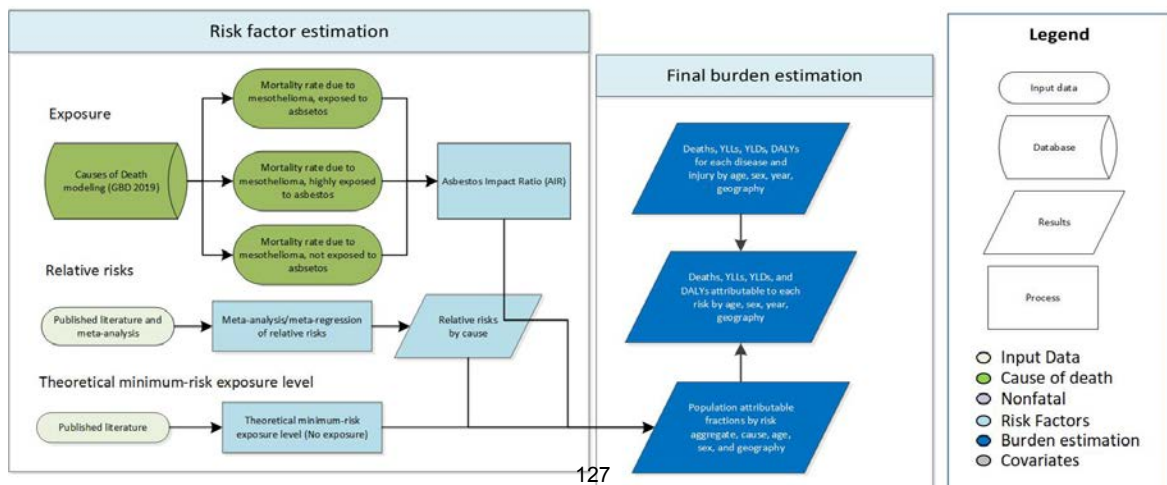

## Exposure definitions

The following definitions were used for occupational risk factor exposures. All exposures were estimated for ages 15 and older.

|                                                                                                                                                                                                        |                                                                                                                                                                                  |
|--------------------------------------------------------------------------------------------------------------------------------------------------------------------------------------------------------|----------------------------------------------------------------------------------------------------------------------------------------------------------------------------------|
| Occupational asbestos                                                                                                                                                                                  | Proportion of the population occupationally exposed to asbestos, using mesothelioma death rate as an analogue                                                                    |
| Occupational asthmagens                                                                                                                                                                                | Proportion of the working population exposed to asthmagens, based on population distributions across nine occupational categories                                                |
| Occupational carcinogens (arsenic, benzene, beryllium, cadmium, chromium, diesel engine exhaust, formaldehyde, nickel, polycyclic aromatic hydrocarbons, silica, sulfuric acid, and trichloroethylene) | Proportion of the population that was ever occupationally exposed to carcinogens at high or low exposure levels, based on population distributions across 17 economic activities |
| Occupational ergonomic factors                                                                                                                                                                         | Proportion of the working population exposed to work that causes low back pain, based on population distributions across nine occupational categories                            |
| Occupational injuries                                                                                                                                                                                  | Proportion of injuries in the working-age population attributable to occupation, based on fatal injury rates in 17 economic activities                                           |
| Occupational noise                                                                                                                                                                                     | Proportion of the population occupationally exposed to 85+ decibels of noise, based on population distributions across 17 economic activities                                    |
| Occupational particulates                                                                                                                                                                              | Proportion of the population occupationally exposed to particles, based on population distributions across 17 economic activities                                                |

Economic activities and occupations were coded according to the following categories:

| <b>Economic activities</b>            | <b>Occupations</b>                            |
|---------------------------------------|-----------------------------------------------|
| Agriculture, hunting, forestry        | Legislators, senior officials, and managers   |
| Fishing                               | Professionals                                 |
| Mining and quarrying                  | Technicians and associate professionals       |
| Manufacturing                         | Clerks                                        |
| Electricity, gas, and water           | Service workers and shop/market sales workers |
| Construction                          | Skilled agricultural and fishery workers      |
| Wholesale and retail trade/repair     | Plant and machine operators and assemblers    |
| Hospitality                           | Craft and related workers                     |
| Transport, storage, and communication | Elementary occupations                        |
| Financial intermediation              |                                               |
| Real estate/renting                   |                                               |

|                                                           |
|-----------------------------------------------------------|
| Public administration/defense; compulsory social security |
| Education                                                 |
| Health and social work                                    |
| Other community/social/personal service activities        |
| Private households                                        |
| Extra-territorial organisations/bodies                    |

## Input data

Primary inputs were obtained from the International Labour Organization (ILO).<sup>1-4</sup> These inputs included raw data on economic activity proportions, occupation proportions, fatal injury rates, and employment to population ratio estimates. No data on informal employment was included due to data sparseness. In 2017, a systematic review was conducted in order to collect the underlying microdata from the ILO's estimates to aid in re-extraction at greater levels of granularity. Where freely available, survey datasets were downloaded from the survey organisations in question. Other datasets were obtained through submission of requests to agencies and through the GBD collaborator network. Microdata were tabulated in order to create survey-weighted estimates of economic activities and occupations for the GBD geographies and years. Various classification systems were adjusted to match the ISIC Rev.3 classification (for economic activities) and ISCO 1988 classification (for occupations).

In 2019, a substantial amount of new ILO data were added. The new data comprise 1197 new unique location-years, including 174 unique locations and 13 unique years (2006–2018). Additionally, a number of old microdata were re-extracted.

For occupational asbestos, primary inputs were obtained through GBD 2019 cause of death estimates and published studies.<sup>7,13,14</sup>

Uncertainty for inputs where microdata were unavailable was generated by fitting a Loess curve to the data and determining the standard deviation of the data from the fitted curve.

Table 1 provides a summary of the exposure input data used.

**Table 1: Data inputs for exposure**

| Input data                    | Exposure |
|-------------------------------|----------|
| Source count (total)          | 2485     |
| Number of countries with data | 199      |

## Modelling strategies

A spatiotemporal Gaussian process regression (ST-GPR) was used to generate estimates for all years and locations for the primary inputs. Space-time parameters were chosen by maximising out-of-sample cross-validation and minimising RMSE. A number of different study-level covariates were used in the linear regression models. The linear models for each of the 46 different ST-GPR models used in occupational exposure estimation are listed below. Although there might appear to be duplicates, there is a distinction between occupation and economic activity (detailed in the footnotes). For example,

“skilled agriculture/fisheries” involves the proportion of the workforce doing agricultural and fishing work, while “agriculture, hunting, forestry” and “fishing” involve the proportion of the workforce employed in those respective industries (ie, one doesn’t have to be actually doing agricultural or fishing work – someone who transports crops would count as being employed in this industry, but their occupation would fall under “plant and machine operators & assemblers”). Additionally, each model included random effects at the region and super-region levels. The covariates are explained in greater detail below.

| ST-GPR model                                        | Linear regression equation                                                                                         |
|-----------------------------------------------------|--------------------------------------------------------------------------------------------------------------------|
| Employment (% of population employed)               | $\text{logit}(\text{data}) = \text{gov\_exp} + \text{prop\_muslim} + \text{education}$                             |
| Armed forces*                                       | $\text{logit}(\text{data}) = \text{sdi} + \text{education} + \text{urbanicity}$                                    |
| Management*                                         | $\text{logit}(\text{data}) = \text{sdi} + \text{education} + \text{urbanicity}$                                    |
| Professional occupations*                           | $\text{logit}(\text{data}) = \text{sdi} + \text{education} + \text{urbanicity}$                                    |
| Scientific/technicians*                             | $\text{logit}(\text{data}) = \text{sdi} + \text{education} + \text{urbanicity}$                                    |
| Clerical work*                                      | $\text{logit}(\text{data}) = \text{sdi} + \text{education} + \text{urbanicity}$                                    |
| Service & shop/market sales workers*                | $\text{logit}(\text{data}) = \text{sdi} + \text{education} + \text{urbanicity}$                                    |
| Skilled agriculture/fisheries*                      | $\text{logit}(\text{data}) = \text{sdi} + \text{latitude} + \text{urbanicity}$                                     |
| Craft and related trades*                           | $\text{logit}(\text{data}) = \text{sdi} + \text{education} + \text{urbanicity}$                                    |
| Plant and machine operators & assemblers*           | $\text{logit}(\text{data}) = \text{sdi} + \text{education} + \text{urbanicity}$                                    |
| Elementary occupations*                             | $\text{logit}(\text{data}) = \text{sdi} + \text{education} + \text{urbanicity}$                                    |
| Agriculture, hunting, forestry†                     | $\text{logit}(\text{data}) = \text{sdi} + \text{latitude} + \text{urbanicity}$                                     |
| Fishing†                                            | $\text{logit}(\text{data}) = \log(\text{coastal\_prop} + 0.01)$                                                    |
| Mining/quarrying†                                   | $\text{logit}(\text{data}) = \text{sdi} + \log(\text{coastal\_prop} + 0.01) + \text{urbanicity} + \text{asbestos}$ |
| Manufacturing†                                      | $\text{logit}(\text{data}) = \text{sdi} + \text{education} + \text{urbanicity}$                                    |
| Electricity/gas/water supply†                       | $\text{logit}(\text{data}) = \log(\text{sdi}) + \text{urbanicity} + \text{temperature}$                            |
| Construction†                                       | $\text{logit}(\text{data}) = \text{sdi} + \text{urbanicity}$                                                       |
| Wholesale and retail trade/repair†                  | $\text{logit}(\text{data}) = \text{sdi} + \text{education} + \text{urbanicity}$                                    |
| Hospitality†                                        | $\text{logit}(\text{data}) = \text{sdi} + \text{urbanicity}$                                                       |
| Transport/storage/communications†                   | $\text{logit}(\text{data}) = \text{sdi} + \text{urbanicity} + \text{vehicles\_pc}$                                 |
| Financial intermediation†                           | $\text{logit}(\text{data}) = \text{sdi} + \text{urbanicity}$                                                       |
| Real estate/renting†                                | $\text{logit}(\text{data}) = \text{sdi} + \text{urbanicity}$                                                       |
| Public administration/defence†                      | $\text{logit}(\text{data}) = \text{sdi} + \text{urbanicity}$                                                       |
| Education†                                          | $\text{logit}(\text{data}) = \text{sdi} + \text{education} + \text{urbanicity}$                                    |
| Health and social work†                             | $\text{logit}(\text{data}) = \log(\text{sdi}) + \log(\text{health\_exp})$                                          |
| Other community/social/personal service activities† | $\text{logit}(\text{data}) = \text{sdi} + \text{urbanicity}$                                                       |
| Private households†                                 | $\text{logit}(\text{data}) = \text{sdi} + \text{urbanicity}$                                                       |
| Extraterritorial organisations and bodies†          | $\text{logit}(\text{data}) = \text{sdi} + \text{urbanicity}$                                                       |
| All occupational injuries models‡                   | $\text{logit}(\text{data}) = \text{sdi}$                                                                           |

\*Proportion of workforce working this type of occupation

†Proportion of workforce employed in this type of economic activity

‡There are 18 different models, corresponding to one for each type of economic activity and a “total” model

| Covariate    | Description                                                     |
|--------------|-----------------------------------------------------------------|
| gov_exp      | Total government expenditure                                    |
| prop_muslim  | Proportion of population that is Muslim                         |
| education    | Age-standardised years of education per capita                  |
| sdi          | Socio-demographic Index                                         |
| urbanicity   | Proportion of population living in urban areas                  |
| latitude     | Absolute value of average latitude of country's center point    |
| coastal_prop | Percentage of total country area within 10 km of a coastal zone |
| asbestos     | Asbestos consumption (metric tons per year per capita)          |
| temperature  | Population-weighted mean temperature                            |
| vehicles_pc  | Number of 2- and 4-wheeled vehicles per capita                  |
| health_exp   | Total health expenditure per capita                             |

For economic activity and occupation proportions, estimates from ST-GPR were then re-scaled to sum to 1 across categories by dividing each estimate by the sum of all the estimates.

The following sections describe the modelling approaches for each occupational risk's exposure prevalence. These approaches were developed for GBD 2016 and have not changed substantially since then. The GBD 2019 methods are largely the same as those from the previous cycle, with the exception of the data processing for occupational injuries, which is explained in greater detail in that section below.

#### ***Occupational carcinogens, occupational noise, and occupational particulates***

Prevalence of exposure to these risks was determined using the following equation:

$$Prevalence\ of\ Exposure_{c,y,s,a,r,l} = \sum_{EA} Proportion_{EA,c,y} * EAP_{c,y,s,a} * Exposure\ rate_{EA,r,l,d}$$

where:

|                                      |                       |          |
|--------------------------------------|-----------------------|----------|
| EAP = economically active population | c = country           | r = risk |
| EA = economic activity               | d = duration          | s = sex  |
| a = age                              | l = level of exposure | y = year |

Exposure rate (proportion of population exposed) was provided by expert group recommendations and literature.<sup>8-11</sup> The CAREX (carcinogen exposure) database<sup>7</sup> was used in order to quantify the association between exposure by industry/carcinogen to SDI across all the countries in the database. This effect was used to predict exposure in countries that were not included in CAREX. Duration was considered for occupational carcinogens through application of occupational turnover factors<sup>12</sup> and for occupational noise and particulates by calculating cumulative exposure as the average exposure over the lifetime (the past 50 years) for each age/sex cohort.

#### ***Occupational ergonomic factors and occupational asthmagens***

Prevalence of exposure to these risks was determined using the following equation:

$$Prevalence\ of\ Exposure_{c,y,s,a,r} = \sum_{EA} Proportion_{OCC,c,y} * EAP_{c,y,s,a}$$

where:

EAP = economically active population    c = country    r = risk  
 EA = economic activity    a = age    s = sex  
 OCC = occupation    y = year

### Occupational injuries

Occupational injury counts were estimated using the following equation:

*Occupational fatal injuries*<sub>c,y,a,s</sub>

$$= \sum_{EA} Injury\ rate_{EA,c,y,s} * Population_{c,y,a,s} * EAP_{c,y,s,a} * Proportion_{EA,c,y}$$

where:

EAP = economically active population    c = country    y = year  
 EA = economic activity    a = age    s = sex

Additionally, in GBD 2019, we updated our data processing to use MR-BRT to crosswalk our data. Occupational injuries exposure data come from a number of different sources: insurance records, labour inspectorate records, establishment surveys, establishment or business registers, labour force surveys, economic or establishment censuses, official estimates, records of employers' organizations, and other administrative records and related sources. We expect insurance records to be the gold-standard source, because people should have more incentive to report injuries when they stand to benefit from their insurance plans. As such, we wanted to correct the data reported from other sources for underreporting, and so we crosswalked all of the data with insurance records data as our reference. To do so, we ran a mixed-effects log-linear regression using MR-BRT, with fixed effects on type of data source and random effects on super-region and region. Table 2 shows the beta coefficients from the MR-BRT model, as well as the crosswalk adjustment factors.

**Table 2: MR-BRT crosswalk adjustment factors for occupational injuries**

| Reference or alternative case definition         | Gamma | Beta coefficient, log (95% CI) | Adjustment factor* |
|--------------------------------------------------|-------|--------------------------------|--------------------|
| Reference (insurance records)                    | 0.1   | ---                            | ---                |
| Alternative (labour inspectorate records)        |       | 0.09 (-0.10, 0.29)             | 0.91, (0.76, 1.13) |
| Alternative (establishment surveys)              |       | -0.27 (-0.47, -0.08)           | 1.31 (1.10, 1.63)  |
| Alternative (labour force surveys)               |       | -0.85 (-1.05, -0.66)           | 2.34 (1.96, 2.91)  |
| Alternative (economic or establishment censuses) |       | -0.07 (-0.26, 0.13)            | 1.07 (0.89, 1.33)  |
| Alternative (official estimates)                 |       | -0.24 (-0.43, -0.04)           | 1.27 (1.06, 1.57)  |

|                                                                |  |                      |                   |
|----------------------------------------------------------------|--|----------------------|-------------------|
| Alternative (establishment or business registers)              |  | -0.35 (-0.60, -0.09) | 1.41 (1.13, 1.90) |
| Alternative (records of employers' organizations)              |  | -0.99 (-1.19, -0.79) | 2.69 (2.25, 3.35) |
| Alternative (other administrative records and related sources) |  | -0.45 (-0.64, -0.25) | 1.56 (1.31, 1.94) |

*\*Adjustment factor is the inverse transformed beta coefficient in normal space and can be interpreted as the factor by which the alternative case definition is adjusted to reflect what it would have been if measured as the reference.*

### **Occupational asbestos**

Prevalence of exposure to asbestos was estimated using the asbestos impact ratio (AIR), which is equivalent to the excess deaths due to mesothelioma observed in a population divided by excess deaths due to mesothelioma in a population heavily exposed to asbestos. Formally, this is defined using the following equation:

$$AIR = \frac{Mort_{c,y,s} - N_{c,y,s}}{Mort_{c,y,s}^* - N_{c,y,s}}$$

where:

|                                                                                     |             |
|-------------------------------------------------------------------------------------|-------------|
| Mort = Mortality rate due to mesothelioma                                           | c = country |
| Mort* = Mortality rate due to mesothelioma in population highly exposed to asbestos | y = year    |
| N = Mortality rate due to mesothelioma in population not exposed to asbestos        | s = sex     |

Mortality rate due to mesothelioma was estimated using GBD 2019 causes of death results. Mortality rate due to mesothelioma in populations not exposed to asbestos was calculated using the model in Lin and colleagues,<sup>13</sup> while the mortality rate due to high exposure to asbestos was estimated using Goodman and colleagues' model.<sup>14</sup> Asbestos exposure prevalence created using the AIR was used to estimate population attributable fractions (PAFs) for all asbestos-associated causes except for mesothelioma. Custom PAFs were calculated for mesothelioma by using the ratio of the excess mortality with respect to an unexposed population (Mort – N) divided by the mortality rate in the population in question (Mort). This calculation assumes that all mesothelioma is a product of occupational asbestos exposure and could potentially overestimate the burden due to occupational asbestos exposure in populations with high non-occupational asbestos exposure.

### **Theoretical minimum-risk exposure level**

For all occupational risks, the theoretical minimum-risk exposure level was assumed to be no exposure to that risk.

## Relative risks

Relative risks were obtained for all occupational risks by conducting a systematic review of published meta-analyses. This review was last updated for GBD 2016. Table 3 provides a summary of the relative risk input data used.

**Table 3: Data inputs for relative risks**

| Input data           | Relative risk |
|----------------------|---------------|
| Source count (total) | 21            |

## Population attributable fractions (PAFs)

For all occupational risks, with the exception of injuries (outlined below) and asbestos (outlined above), PAFs were calculated using the exposure prevalences estimated above, using the PAF formula in outlined in the GBD 2019 methods appendix.

### **Occupational injuries PAF**

The PAFs for occupational injuries were calculated using the following formula:

$$PAF_{c,y,a,s} = \frac{Occupational\ fatal\ injuries_{c,y,a,s} - TMREL}{Fatal\ injuries_{c,y,a,s}}$$

where:

c = country

a = age

y = year

s = sex

Fatal injury totals were obtained from GBD 2019 causes of death.

## References

1. International Labour Organization (ILO). International Labour Organization Database (ILOSTAT) - Employment by Sex and Economic Activity. International Labour Organization (ILO).
2. International Labour Organization (ILO). International Labour Organization Database (ILOSTAT) - Employment by Sex and Occupation. International Labour Organization (ILO).
3. International Labour Organization (ILO). International Labour Organization Database (ILOSTAT) - Fatal Injuries by Sex and Economic Activity. International Labour Organization (ILO).
4. International Labour Organization (ILO). International Labour Organization LABORSTA Economically Active Population, Estimates and Projections, October 2011. International Labour Organization (ILO), 2011.
5. Office for National Statistics (United Kingdom). Nomis Official Labor Market Statistics - Annual Population Survey. Newport, United Kingdom: Office for National Statistics (United Kingdom).
6. National Bureau of Statistics of China. China 1% National Population Sample Survey 1995. Ann Arbor, United States: China Data Center, University of Michigan.

7. Kauppinen T, Toikkanen J, Pedersen D, *et al.* Occupational exposure to carcinogens in the European Union. *Occupational and Environmental Medicine* 2000; **57**: 10–8.
8. Wilson DH, Walsh PG, Sanchez L, *et al.* The epidemiology of hearing impairment in an Australian adult population. *Int J Epidemiol* 1999; **28**: 247–52
9. Kauppinen T, Toikkanen J, Pedersen D, Young R, Kogevinas M, Ahrens W, *et al.* Occupational Exposure to Carcinogens in the European Union in 1990-93. Helsinki, Finland: Finnish Institute of Occupational Health; 1998.
10. Kauppinen T, Toikkanen J, Pedersen D, Young R, Ahrens W, Boffetta P, *et al.* Occupational exposure to carcinogens in the European Union. *Occup Environ Med* 2000; **57**(1): 10–18.
11. Driscoll T, *et al.* The global burden of non-malignant respiratory disease due to occupational airborne exposures. *American Journal of Industrial Medicine* 2005; **48**(6): 432-445.
12. Nelson, D. I., Concha-Barrientos, M., Driscoll, T., Steenland, K., Fingerhut, M., Punnett, L. & Corvalan, C. (2005). The global burden of selected occupational diseases and injury risks: Methodology and summary. *American journal of industrial medicine*, **48**(6), 400-418
13. Lin R-T, Takahashi K, Karjalainen A, *et al.* Ecological association between asbestos-related diseases and historical asbestos consumption: an international analysis. *Lancet* 2007; **369**: 844–9.
14. Goodman M, Morgan RW, Ray R, Malloy CD, Zhao K. Cancer in asbestos-exposed occupational cohorts: a meta-analysis. *Cancer Causes Control* 1999; **10**: 453–65.

## Calculating the burden of multiple risk factors

Validation studies have reported congruency between the true risk associated with multiple risk factors affecting the same outcome and a multiplicative aggregation of the PAFs of the individual risk factors (formula below).<sup>1</sup>

$$PAF_{1..i} = 1 - \prod_{i=1}^n (1 - PAF_i)$$

where *PAF* is the population attributable fraction and *i* is each individual risk factor.

The same validation studies also found that the overestimation from ignoring the covariance between risk factors is small. This small overestimation was important to note because few data sources exist from which we can draw information on covariance.

### Reference

Lim, S.S., Carnahan, E., Nelson, E.C. et al. Validation of a new predictive risk model: measuring the impact of the major modifiable risks of death for patients and populations. *Population Health Metrics* 13, 27 (2015).  
<https://doi.org/10.1186/s12963-015-0059-8>

## Inclusion of a risk–outcome pair in the GBD

Inclusion of a risk–outcome pair in the GBD was determined based on the World Cancer Research Fund criteria for convincing or probable evidence.<sup>1,2</sup> Convincing evidence requires the following: evidence from more than one study type; evidence from at least two independent cohort studies; no substantial unexplained heterogeneity within or between study types; good-quality studies to exclude the possibility of confounding, measurement error, and selection bias; and a biologically plausible dose–response relationship. Probable evidence requires: evidence from at least two independent cohort studies or five or more case-control studies; no substantial unexplained heterogeneity within or between study types; good-quality studies to rule out the possibility of confounding, measurement error, and selection bias; and biological plausibility.

The GBD also needed evidence based on past research on the likelihood of importance of a risk factor to disease burden or policy; the availability of adequate data and methodologies for estimating exposure distributions by country; adequate data to estimate outcome-specific effect sizes per unit of exposure; and evidence that effect sizes may be extrapolated to populations other than those studied in epidemiological studies or methods for doing so.<sup>3</sup> Lastly, for a newly evaluated risk–outcome pair, the GBD needed a statistically significant association ( $p < 0.05$ ) after accounting for sources of potential bias.<sup>4</sup>

### Reference

1. World Cancer Research Fund / American Institute for Cancer Research. Judging the evidence. <https://www.wcrf.org/wp-content/uploads/2021/02/judging-the-evidence.pdf> (accessed May 12, 2022).
2. World Cancer Research Fund/ American Institute for Cancer Research. Food, Nutrition, and Physical Activity, and the Prevention of Cancer. A Global Perspective. Washington D.C, 2007.
3. Lim SS, Vos T, Flaxman AD, et al. A comparative risk assessment of burden of disease and injury attributable to 67 risk factors and risk factor clusters in 21 regions, 1990–2010: a systematic analysis for the Global Burden of Disease Study 2010. *The Lancet* 2013; 380(9859): 2224-60.
4. GBD 2019 Risk Factors Collaborators. Global burden of 87 risk factors in 204 countries and territories, 1990–2019: a systematic analysis for the Global Burden of Disease Study 2019. *Lancet* 2020; 396(10258): 1223-49.

## Supplementary Tables and Figures

Table S1. GATHER checklist

| #                                                                                                     | GATHER checklist item                                                                                                                                                                                                                                                                                                                                                                   | Description of Compliance                                                                                                                                                                                                                                                      | Reference                                                                                                                                                      |
|-------------------------------------------------------------------------------------------------------|-----------------------------------------------------------------------------------------------------------------------------------------------------------------------------------------------------------------------------------------------------------------------------------------------------------------------------------------------------------------------------------------|--------------------------------------------------------------------------------------------------------------------------------------------------------------------------------------------------------------------------------------------------------------------------------|----------------------------------------------------------------------------------------------------------------------------------------------------------------|
| <b>Objectives and funding</b>                                                                         |                                                                                                                                                                                                                                                                                                                                                                                         |                                                                                                                                                                                                                                                                                |                                                                                                                                                                |
| 1                                                                                                     | Define the indicators, populations, and time periods for which estimates were made.                                                                                                                                                                                                                                                                                                     | Narrative provided in paper and methods appendix describing indicators, definitions, and populations                                                                                                                                                                           | Main text (Methods) and methods appendix                                                                                                                       |
| 2                                                                                                     | List the funding sources for the work.                                                                                                                                                                                                                                                                                                                                                  | Funding sources listed in paper                                                                                                                                                                                                                                                | Summary (Funding)                                                                                                                                              |
| <b>Data Inputs</b>                                                                                    |                                                                                                                                                                                                                                                                                                                                                                                         |                                                                                                                                                                                                                                                                                |                                                                                                                                                                |
| <i>For all data inputs from multiple sources that are synthesized as part of the study:</i>           |                                                                                                                                                                                                                                                                                                                                                                                         |                                                                                                                                                                                                                                                                                |                                                                                                                                                                |
| 3                                                                                                     | Describe how the data were identified and how the data were accessed.                                                                                                                                                                                                                                                                                                                   | Narrative description of data seeking methods provided                                                                                                                                                                                                                         | Methods appendix                                                                                                                                               |
| 4                                                                                                     | Specify the inclusion and exclusion criteria. Identify all ad-hoc exclusions.                                                                                                                                                                                                                                                                                                           | Narrative about inclusion and exclusion criteria by data type provided                                                                                                                                                                                                         | Methods appendix                                                                                                                                               |
| 5                                                                                                     | Provide information on all included data sources and their main characteristics. For each data source used, report reference information or contact name/institution, population represented, data collection method, year(s) of data collection, sex and age range, diagnostic criteria or measurement method, and sample size, as relevant.                                           | An interactive, online data source tool that provides metadata for data sources by component, geography, cause, risk, or impairment has been developed                                                                                                                         | Online data citation tools<br><a href="http://ghdx.healthdata.org/gbd-2019">http://ghdx.healthdata.org/gbd-2019</a>                                            |
| 6                                                                                                     | Identify and describe any categories of input data that have potentially important biases (e.g., based on characteristics listed in item 5).                                                                                                                                                                                                                                            | Summary of known biases by cause included in methods appendix                                                                                                                                                                                                                  | Methods appendix                                                                                                                                               |
| <i>For data inputs that contribute to the analysis but were not synthesized as part of the study:</i> |                                                                                                                                                                                                                                                                                                                                                                                         |                                                                                                                                                                                                                                                                                |                                                                                                                                                                |
| 7                                                                                                     | Describe and give sources for any other data inputs.                                                                                                                                                                                                                                                                                                                                    | Included in online data source tool, <a href="http://ghdx.healthdata.org/gbd-2019">http://ghdx.healthdata.org/gbd-2019</a>                                                                                                                                                     | Online data citation tools                                                                                                                                     |
| <b>For all data inputs:</b>                                                                           |                                                                                                                                                                                                                                                                                                                                                                                         |                                                                                                                                                                                                                                                                                |                                                                                                                                                                |
| 8                                                                                                     | Provide all data inputs in a file format from which data can be efficiently extracted (e.g., a spreadsheet as opposed to a PDF), including all relevant meta-data listed in item 5. For any data inputs that cannot be shared due to ethical or legal reasons, such as third-party ownership, provide a contact name or the name of the institution that retains the right to the data. | Downloads of input data available through online tools, including data visualization tools and data query tools, <a href="http://ghdx.healthdata.org/gbd-2019">http://ghdx.healthdata.org/gbd-2019</a> ; input data not available in tools will be made available upon request | Online data visualization tools, data query tools, and the Global Health Data Exchange:<br><a href="http://ghdx.healthdata.org">http://ghdx.healthdata.org</a> |
| <b>Data analysis</b>                                                                                  |                                                                                                                                                                                                                                                                                                                                                                                         |                                                                                                                                                                                                                                                                                |                                                                                                                                                                |
| 9                                                                                                     | Provide a conceptual overview of the data analysis method. A diagram may be helpful.                                                                                                                                                                                                                                                                                                    | Flow diagrams of the overall methodological processes, as well as cause-specific modelling processes, have been provided                                                                                                                                                       | Methods appendix                                                                                                                                               |

|                               |                                                                                                                                                                                                                                                                         |                                                                                                                                                                               |                                                                                                                                                          |
|-------------------------------|-------------------------------------------------------------------------------------------------------------------------------------------------------------------------------------------------------------------------------------------------------------------------|-------------------------------------------------------------------------------------------------------------------------------------------------------------------------------|----------------------------------------------------------------------------------------------------------------------------------------------------------|
| 10                            | Provide a detailed description of all steps of the analysis, including mathematical formulae. This description should cover, as relevant, data cleaning, data pre-processing, data adjustments and weighting of data sources, and mathematical or statistical model(s). | Flow diagrams and corresponding methodological writeups for each cause, as well as the demographics and causes of death databases and modelling processes, have been provided | Main text (Methods) and methods appendix                                                                                                                 |
| 11                            | Describe how candidate models were evaluated and how the final model(s) were selected.                                                                                                                                                                                  | Provided in the methodological writeups                                                                                                                                       | Methods appendix                                                                                                                                         |
| 12                            | Provide the results of an evaluation of model performance, if done, as well as the results of any relevant sensitivity analysis.                                                                                                                                        | Provided in the methodological writeups                                                                                                                                       | Methods appendix                                                                                                                                         |
| 13                            | Describe methods for calculating uncertainty of the estimates. State which sources of uncertainty were, and were not, accounted for in the uncertainty analysis.                                                                                                        | Provided in the methodological writeups                                                                                                                                       | Methods appendix                                                                                                                                         |
| 14                            | State how analytic or statistical source code used to generate estimates can be accessed.                                                                                                                                                                               | Access statement provided                                                                                                                                                     | Code is provided in an online repository: <a href="http://ghdx.healthdata.org/gbd-2019/code">http://ghdx.healthdata.org/gbd-2019/code</a>                |
| <b>Results and Discussion</b> |                                                                                                                                                                                                                                                                         |                                                                                                                                                                               |                                                                                                                                                          |
| 15                            | Provide published estimates in a file format from which data can be efficiently extracted.                                                                                                                                                                              | GBD 2019 results are available through online data visualization tools, the Global Health Data Exchange, and the online data query tool                                       | Main text, methods appendix, appendices 2-4, and online data tools <a href="http://ghdx.healthdata.org/gbd-2019">http://ghdx.healthdata.org/gbd-2019</a> |
| 16                            | Report a quantitative measure of the uncertainty of the estimates (e.g. uncertainty intervals).                                                                                                                                                                         | Uncertainty intervals are provided with all results                                                                                                                           | Main text, methods appendix, appendices 2-4, and online data tools <a href="http://ghdx.healthdata.org/gbd-2019">http://ghdx.healthdata.org/gbd-2019</a> |
| 17                            | Interpret results in light of existing evidence. If updating a previous set of estimates, describe the reasons for changes in estimates.                                                                                                                                | Discussion of methodological changes between GBD rounds provided in the narrative of the Article and methods appendix                                                         | Main text (Methods and Discussion) and methods appendix                                                                                                  |
| 18                            | Discuss limitations of the estimates. Include a discussion of any modelling assumptions or data limitations that affect interpretation of the estimates.                                                                                                                | Discussion of limitations provided in the narrative of the main paper, as well as in the methodological writeups in the methods appendix                                      | Main text (Discussion) and methods appendix                                                                                                              |

Table S2. List of International Classification of Diseases (ICD) codes mapped to the Global Burden of Disease cause list for causes of death

| Cause                                                      | ICD10                                                                                                                              | ICD9                                                                                                                                              |
|------------------------------------------------------------|------------------------------------------------------------------------------------------------------------------------------------|---------------------------------------------------------------------------------------------------------------------------------------------------|
| <b>Chronic respiratory diseases</b>                        | D86-D86.2, D86.9, G47.3, J30-J35.9, J37-J39.9, J41-J46.9, J60-J63.8, J65-J68.9, J70, J70.8-J70.9, J82, J84-J84.9, J91, J91.8-J92.9 | 135-135.9, 327.2-327.8, 470, 470.9-474.9, 476-476.1, 477-479, 491-493.9, 495-504.9, 506-506.9, 508-509, 515, 516-517.8, 518.6, 518.9, 519.1-519.4 |
| <b>Chronic obstructive pulmonary disease</b>               | J41-J44.9                                                                                                                          | 491-492.9, 496-499                                                                                                                                |
| <b>Pneumoconiosis</b>                                      | J60-J63.8, J65-J65.0, J92.0                                                                                                        | 500-504.9                                                                                                                                         |
| <b>Silicosis</b>                                           | J62-J62.9                                                                                                                          | 502-502.9, 503.0, 503.9                                                                                                                           |
| <b>Asbestosis</b>                                          | J61-J61.0, J92.0                                                                                                                   | 501                                                                                                                                               |
| <b>Coal workers pneumoconiosis</b>                         | J60-J60.0                                                                                                                          | 500-500.9, 501.0-501.9                                                                                                                            |
| <b>Other pneumoconiosis</b>                                | J63-J63.8, J65-J65.0                                                                                                               | 503, 503.1, 504-504.9                                                                                                                             |
| <b>Asthma</b>                                              | J45-J46.9                                                                                                                          | 493-493.9                                                                                                                                         |
| <b>Interstitial lung disease and pulmonary sarcoidosis</b> | D86-D86.2, D86.9, J84-J84.9                                                                                                        | 135-135.9, 515, 516-516.9                                                                                                                         |
| <b>Other chronic respiratory diseases</b>                  | G47.3, J30-J35.9, J37-J39.9, J66-J68.9, J70, J70.8-J70.9, J82, J91, J91.8-J92, J92.9                                               | 327.2-327.8, 470, 470.9-474.9, 476-476.1, 477-479, 495-495.9, 506-506.9, 508-509, 517-517.8, 518.6, 518.9, 519.1-519.4                            |

Table S3. Restrictions on age and sex by cause for GBD 2019

| Cause                                                      | Minimum age | Maximum age | Sex Restrictions |
|------------------------------------------------------------|-------------|-------------|------------------|
| <b>Chronic respiratory diseases</b>                        | 28 days     | Not applied | Not applied      |
| <b>Chronic obstructive pulmonary disease</b>               | 28 days     | Not applied | Not applied      |
| <b>Pneumoconiosis</b>                                      | 15 years    | Not applied | Not applied      |
| <b>Silicosis</b>                                           | 15 years    | Not applied | Not applied      |
| <b>Asbestosis</b>                                          | 15 years    | Not applied | Not applied      |
| <b>Coal workers pneumoconiosis</b>                         | 15 years    | Not applied | Not applied      |
| <b>Other pneumoconiosis</b>                                | 15 years    | Not applied | Not applied      |
| <b>Asthma</b>                                              | 1 year      | Not applied | Not applied      |
| <b>Interstitial lung disease and pulmonary sarcoidosis</b> | 1 year      | Not applied | Not applied      |
| <b>Other chronic respiratory diseases</b>                  | Not applied | Not applied | Not applied      |

Table S4. Total number of site years by cause and source type for 2019

| <b>Cause</b>                                                   | <b>Level</b> | <b>Vital<br/>Registration</b> | <b>Vital Registration<br/>- Sample</b> | <b>Verbal<br/>Autopsy</b> | <b>Surveillance</b> |
|----------------------------------------------------------------|--------------|-------------------------------|----------------------------------------|---------------------------|---------------------|
| <b>Chronic respiratory diseases</b>                            | 2            | 22568                         | 825                                    | 1515                      | 549                 |
| <b>Chronic obstructive pulmonary<br/>disease</b>               | 3            | 20371                         | 825                                    |                           |                     |
| <b>Pneumoconiosis</b>                                          | 3            | 20365                         | 448                                    |                           |                     |
| <b>Silicosis</b>                                               | 4            | 20216                         | 448                                    |                           |                     |
| <b>Asbestosis</b>                                              | 4            | 20216                         | 448                                    |                           |                     |
| <b>Coal workers<br/>pneumoconiosis</b>                         | 4            | 20216                         | 448                                    |                           |                     |
| <b>Other pneumoconiosis</b>                                    | 4            | 20216                         | 448                                    |                           |                     |
| <b>Asthma</b>                                                  | 3            | 20364                         | 448                                    |                           |                     |
| <b>Interstitial lung disease and<br/>pulmonary sarcoidosis</b> | 3            | 20361                         | 448                                    |                           |                     |
| <b>Other chronic respiratory<br/>diseases</b>                  | 3            | 20371                         | 825                                    |                           |                     |

Table S5. CODEm covariates used, level of covariate, and expected direction of covariate by cause, sex, and age (*Covariates that CODEm did not select during the covariate selection process have no draw counts listed.*)

| Cause                        | Sex    | Age Start | Age End   | Model Type | Direction | Level | Covariate Name                                      | Number of Draws |
|------------------------------|--------|-----------|-----------|------------|-----------|-------|-----------------------------------------------------|-----------------|
| Chronic respiratory diseases | Female | 1-4 years | 95+ years | Data Rich  | 1         | 1     | Cumulative Cigarettes (10 Years)                    | 26              |
| Chronic respiratory diseases | Female | 1-4 years | 95+ years | Data Rich  | 1         | 1     | Cumulative Cigarettes (5 Years)                     | 48              |
| Chronic respiratory diseases | Female | 1-4 years | 95+ years | Data Rich  | 1         | 1     | Healthcare access and quality index                 | --              |
| Chronic respiratory diseases | Female | 1-4 years | 95+ years | Data Rich  | 1         | 1     | Log-transformed SEV scalar: Chr Resp                | --              |
| Chronic respiratory diseases | Female | 1-4 years | 95+ years | Data Rich  | 1         | 2     | Smoking Prevalence                                  | 3               |
| Chronic respiratory diseases | Female | 1-4 years | 95+ years | Data Rich  | 1         | 2     | Indoor Air Pollution (All Cooking Fuels)            | 120             |
| Chronic respiratory diseases | Female | 1-4 years | 95+ years | Data Rich  | 1         | 2     | Outdoor Air Pollution (PM2.5)                       | 242             |
| Chronic respiratory diseases | Female | 1-4 years | 95+ years | Data Rich  | 1         | 2     | Elevation Over 1500m (proportion)                   | 365             |
| Chronic respiratory diseases | Female | 1-4 years | 95+ years | Data Rich  | -1        | 3     | Education (years per capita)                        | 142             |
| Chronic respiratory diseases | Female | 1-4 years | 95+ years | Data Rich  | -1        | 3     | LDI (I\$ per capita)                                | --              |
| Chronic respiratory diseases | Female | 1-4 years | 95+ years | Data Rich  | 0         | 3     | Socio-demographic Index                             | 246             |
| Chronic respiratory diseases | Female | 1-4 years | 95+ years | Data Rich  | 1         | 3     | Population Density (over 1000 ppl/sqkm, proportion) | 0               |
| Chronic respiratory diseases | Female | 1-4 years | 95+ years | Data Rich  | 1         | 3     | Elevation 500 to 1500m (proportion)                 | 434             |
| Chronic respiratory diseases | Female | 1-4 years | 95+ years | Global     | 1         | 1     | Cumulative Cigarettes (10 Years)                    | 22              |
| Chronic respiratory diseases | Female | 1-4 years | 95+ years | Global     | 1         | 1     | Cumulative Cigarettes (5 Years)                     | 23              |
| Chronic respiratory diseases | Female | 1-4 years | 95+ years | Global     | 1         | 1     | Healthcare access and quality index                 | --              |
| Chronic respiratory diseases | Female | 1-4 years | 95+ years | Global     | 1         | 1     | Log-transformed SEV scalar: Chr Resp                | --              |
| Chronic respiratory diseases | Female | 1-4 years | 95+ years | Global     | 1         | 2     | Smoking Prevalence                                  | 11              |
| Chronic respiratory diseases | Female | 1-4 years | 95+ years | Global     | 1         | 2     | Elevation Over 1500m (proportion)                   | 622             |
| Chronic respiratory diseases | Female | 1-4 years | 95+ years | Global     | 1         | 2     | Indoor Air Pollution (All Cooking Fuels)            | 622             |
| Chronic respiratory diseases | Female | 1-4 years | 95+ years | Global     | 1         | 2     | Outdoor Air Pollution (PM2.5)                       | --              |
| Chronic respiratory diseases | Female | 1-4 years | 95+ years | Global     | -1        | 3     | Education (years per capita)                        | 400             |
| Chronic respiratory diseases | Female | 1-4 years | 95+ years | Global     | -1        | 3     | LDI (I\$ per capita)                                | --              |
| Chronic respiratory diseases | Female | 1-4 years | 95+ years | Global     | 0         | 3     | Socio-demographic Index                             | 153             |
| Chronic respiratory diseases | Female | 1-4 years | 95+ years | Global     | 1         | 3     | Elevation 500 to 1500m (proportion)                 | 684             |
| Chronic respiratory diseases | Female | 1-4 years | 95+ years | Global     | 1         | 3     | Population Density (over 1000 ppl/sqkm, proportion) | --              |

| Cause                                 | Sex    | Age Start | Age End   | Model Type | Direction | Level | Covariate Name                                      | Number of Draws |
|---------------------------------------|--------|-----------|-----------|------------|-----------|-------|-----------------------------------------------------|-----------------|
| Chronic respiratory diseases          | Male   | 1-4 years | 95+ years | Data Rich  | 1         | 1     | Cumulative Cigarettes (10 Years)                    | 337             |
| Chronic respiratory diseases          | Male   | 1-4 years | 95+ years | Data Rich  | 1         | 1     | Cumulative Cigarettes (5 Years)                     | 526             |
| Chronic respiratory diseases          | Male   | 1-4 years | 95+ years | Data Rich  | 1         | 1     | Log-transformed SEV scalar: Chr Resp                | --              |
| Chronic respiratory diseases          | Male   | 1-4 years | 95+ years | Data Rich  | -1        | 2     | Healthcare access and quality index                 | 2               |
| Chronic respiratory diseases          | Male   | 1-4 years | 95+ years | Data Rich  | 1         | 2     | Indoor Air Pollution (All Cooking Fuels)            | 0               |
| Chronic respiratory diseases          | Male   | 1-4 years | 95+ years | Data Rich  | 1         | 2     | Smoking Prevalence                                  | 775             |
| Chronic respiratory diseases          | Male   | 1-4 years | 95+ years | Data Rich  | 1         | 2     | Elevation Over 1500m (proportion)                   | 777             |
| Chronic respiratory diseases          | Male   | 1-4 years | 95+ years | Data Rich  | 1         | 2     | Outdoor Air Pollution (PM2.5)                       | 777             |
| Chronic respiratory diseases          | Male   | 1-4 years | 95+ years | Data Rich  | -1        | 3     | Education (years per capita)                        | 140             |
| Chronic respiratory diseases          | Male   | 1-4 years | 95+ years | Data Rich  | -1        | 3     | LDI (I\$ per capita)                                | --              |
| Chronic respiratory diseases          | Male   | 1-4 years | 95+ years | Data Rich  | 0         | 3     | Socio-demographic Index                             | 116             |
| Chronic respiratory diseases          | Male   | 1-4 years | 95+ years | Data Rich  | 1         | 3     | Population Density (over 1000 ppl/sqkm, proportion) | 158             |
| Chronic respiratory diseases          | Male   | 1-4 years | 95+ years | Data Rich  | 1         | 3     | Elevation 500 to 1500m (proportion)                 | 484             |
| Chronic respiratory diseases          | Male   | 1-4 years | 95+ years | Global     | 1         | 1     | Cumulative Cigarettes (10 Years)                    | 75              |
| Chronic respiratory diseases          | Male   | 1-4 years | 95+ years | Global     | 1         | 1     | Indoor Air Pollution (All Cooking Fuels)            | 165             |
| Chronic respiratory diseases          | Male   | 1-4 years | 95+ years | Global     | 1         | 1     | Cumulative Cigarettes (5 Years)                     | 234             |
| Chronic respiratory diseases          | Male   | 1-4 years | 95+ years | Global     | 1         | 1     | Smoking Prevalence                                  | 296             |
| Chronic respiratory diseases          | Male   | 1-4 years | 95+ years | Global     | 1         | 1     | Log-transformed SEV scalar: Chr Resp                | --              |
| Chronic respiratory diseases          | Male   | 1-4 years | 95+ years | Global     | -1        | 2     | Healthcare access and quality index                 | 253             |
| Chronic respiratory diseases          | Male   | 1-4 years | 95+ years | Global     | 1         | 2     | Outdoor Air Pollution (PM2.5)                       | 0               |
| Chronic respiratory diseases          | Male   | 1-4 years | 95+ years | Global     | 1         | 2     | Elevation Over 1500m (proportion)                   | 548             |
| Chronic respiratory diseases          | Male   | 1-4 years | 95+ years | Global     | -1        | 3     | Education (years per capita)                        | 467             |
| Chronic respiratory diseases          | Male   | 1-4 years | 95+ years | Global     | -1        | 3     | LDI (I\$ per capita)                                | --              |
| Chronic respiratory diseases          | Male   | 1-4 years | 95+ years | Global     | 0         | 3     | Socio-demographic Index                             | 262             |
| Chronic respiratory diseases          | Male   | 1-4 years | 95+ years | Global     | 1         | 3     | Population Density (over 1000 ppl/sqkm, proportion) | 202             |
| Chronic respiratory diseases          | Male   | 1-4 years | 95+ years | Global     | 1         | 3     | Elevation 500 to 1500m (proportion)                 | 846             |
| Chronic obstructive pulmonary disease | Female | 1-4 years | 95+ years | Data Rich  | 1         | 1     | Outdoor Air Pollution (PM2.5)                       | 446             |
| Chronic obstructive pulmonary disease | Female | 1-4 years | 95+ years | Data Rich  | 1         | 1     | Elevation Over 1500m (proportion)                   | 678             |
| Chronic obstructive                   | Female | 1-4 years | 95+ years | Data Rich  | 1         | 1     | Healthcare access and                               | 706             |

| Cause                                 | Sex    | Age Start | Age End   | Model Type | Direction | Level | Covariate Name                           | Number of Draws |
|---------------------------------------|--------|-----------|-----------|------------|-----------|-------|------------------------------------------|-----------------|
| pulmonary disease                     |        |           |           |            |           |       | quality index                            |                 |
| Chronic obstructive pulmonary disease | Female | 1-4 years | 95+ years | Data Rich  | 1         | 1     | Cumulative Cigarettes (10 Years)         | --              |
| Chronic obstructive pulmonary disease | Female | 1-4 years | 95+ years | Data Rich  | 1         | 1     | Cumulative Cigarettes (5 Years)          | --              |
| Chronic obstructive pulmonary disease | Female | 1-4 years | 95+ years | Data Rich  | 1         | 1     | Log-transformed SEV scalar: COPD         | --              |
| Chronic obstructive pulmonary disease | Female | 1-4 years | 95+ years | Data Rich  | 1         | 2     | Indoor Air Pollution (All Cooking Fuels) | 1               |
| Chronic obstructive pulmonary disease | Female | 1-4 years | 95+ years | Data Rich  | 1         | 2     | Smoking Prevalence                       | 3               |
| Chronic obstructive pulmonary disease | Female | 1-4 years | 95+ years | Data Rich  | -1        | 3     | Education (years per capita)             | 2               |
| Chronic obstructive pulmonary disease | Female | 1-4 years | 95+ years | Data Rich  | -1        | 3     | LDI (I\$ per capita)                     | --              |
| Chronic obstructive pulmonary disease | Female | 1-4 years | 95+ years | Data Rich  | 0         | 3     | Socio-demographic Index                  | 782             |
| Chronic obstructive pulmonary disease | Female | 1-4 years | 95+ years | Global     | 1         | 1     | Healthcare access and quality index      | 588             |
| Chronic obstructive pulmonary disease | Female | 1-4 years | 95+ years | Global     | 1         | 1     | Elevation Over 1500m (proportion)        | 803             |
| Chronic obstructive pulmonary disease | Female | 1-4 years | 95+ years | Global     | 1         | 1     | Cumulative Cigarettes (10 Years)         | --              |
| Chronic obstructive pulmonary disease | Female | 1-4 years | 95+ years | Global     | 1         | 1     | Cumulative Cigarettes (5 Years)          | --              |
| Chronic obstructive pulmonary disease | Female | 1-4 years | 95+ years | Global     | 1         | 1     | Log-transformed SEV scalar: COPD         | --              |
| Chronic obstructive pulmonary disease | Female | 1-4 years | 95+ years | Global     | 1         | 1     | Outdoor Air Pollution (PM2.5)            | --              |
| Chronic obstructive pulmonary disease | Female | 1-4 years | 95+ years | Global     | 1         | 2     | Smoking Prevalence                       | 3               |
| Chronic obstructive pulmonary disease | Female | 1-4 years | 95+ years | Global     | 1         | 2     | Indoor Air Pollution (All Cooking Fuels) | 206             |
| Chronic obstructive pulmonary disease | Female | 1-4 years | 95+ years | Global     | -1        | 3     | Education (years per capita)             | 35              |
| Chronic obstructive pulmonary disease | Female | 1-4 years | 95+ years | Global     | -1        | 3     | LDI (I\$ per capita)                     | --              |
| Chronic obstructive pulmonary disease | Female | 1-4 years | 95+ years | Global     | 0         | 3     | Socio-demographic Index                  | 140             |
| Chronic obstructive pulmonary disease | Male   | 1-4 years | 95+ years | Data Rich  | 1         | 1     | Cumulative Cigarettes (10 Years)         | 0               |
| Chronic obstructive pulmonary disease | Male   | 1-4 years | 95+ years | Data Rich  | 1         | 1     | Cumulative Cigarettes (20 Years)         | 0               |
| Chronic obstructive pulmonary disease | Male   | 1-4 years | 95+ years | Data Rich  | 1         | 1     | Cumulative Cigarettes (5 Years)          | 0               |
| Chronic obstructive pulmonary disease | Male   | 1-4 years | 95+ years | Data Rich  | 1         | 1     | Elevation Over 1500m (proportion)        | 485             |
| Chronic obstructive pulmonary disease | Male   | 1-4 years | 95+ years | Data Rich  | 1         | 1     | Outdoor Air Pollution (PM2.5)            | 551             |
| Chronic obstructive pulmonary disease | Male   | 1-4 years | 95+ years | Data Rich  | 1         | 1     | Log-transformed SEV scalar: COPD         | --              |
| Chronic obstructive pulmonary disease | Male   | 1-4 years | 95+ years | Data Rich  | -1        | 2     | Healthcare access and quality index      | 0               |
| Chronic obstructive pulmonary disease | Male   | 1-4 years | 95+ years | Data Rich  | 1         | 2     | Indoor Air Pollution (All Cooking Fuels) | 0               |

| Cause                                 | Sex    | Age Start   | Age End   | Model Type | Direction | Level | Covariate Name                                         | Number of Draws |
|---------------------------------------|--------|-------------|-----------|------------|-----------|-------|--------------------------------------------------------|-----------------|
| Chronic obstructive pulmonary disease | Male   | 1-4 years   | 95+ years | Data Rich  | 1         | 2     | Smoking Prevalence                                     | 488             |
| Chronic obstructive pulmonary disease | Male   | 1-4 years   | 95+ years | Data Rich  | -1        | 3     | Education (years per capita)                           | 813             |
| Chronic obstructive pulmonary disease | Male   | 1-4 years   | 95+ years | Data Rich  | -1        | 3     | LDI (I\$ per capita)                                   | --              |
| Chronic obstructive pulmonary disease | Male   | 1-4 years   | 95+ years | Data Rich  | 0         | 3     | Socio-demographic Index                                | 940             |
| Chronic obstructive pulmonary disease | Male   | 1-4 years   | 95+ years | Global     | 1         | 1     | Cumulative Cigarettes (20 Years)                       | 0               |
| Chronic obstructive pulmonary disease | Male   | 1-4 years   | 95+ years | Global     | 1         | 1     | Cumulative Cigarettes (10 Years)                       | 4               |
| Chronic obstructive pulmonary disease | Male   | 1-4 years   | 95+ years | Global     | 1         | 1     | Cumulative Cigarettes (5 Years)                        | 7               |
| Chronic obstructive pulmonary disease | Male   | 1-4 years   | 95+ years | Global     | 1         | 1     | Outdoor Air Pollution (PM2.5)                          | 124             |
| Chronic obstructive pulmonary disease | Male   | 1-4 years   | 95+ years | Global     | 1         | 1     | Elevation Over 1500m (proportion)                      | 939             |
| Chronic obstructive pulmonary disease | Male   | 1-4 years   | 95+ years | Global     | 1         | 1     | Log-transformed SEV scalar: COPD                       | --              |
| Chronic obstructive pulmonary disease | Male   | 1-4 years   | 95+ years | Global     | -1        | 2     | Healthcare access and quality index                    | 477             |
| Chronic obstructive pulmonary disease | Male   | 1-4 years   | 95+ years | Global     | 1         | 2     | Indoor Air Pollution (All Cooking Fuels)               | 71              |
| Chronic obstructive pulmonary disease | Male   | 1-4 years   | 95+ years | Global     | 1         | 2     | Smoking Prevalence                                     | 380             |
| Chronic obstructive pulmonary disease | Male   | 1-4 years   | 95+ years | Global     | -1        | 3     | Education (years per capita)                           | 437             |
| Chronic obstructive pulmonary disease | Male   | 1-4 years   | 95+ years | Global     | -1        | 3     | LDI (I\$ per capita)                                   | --              |
| Chronic obstructive pulmonary disease | Male   | 1-4 years   | 95+ years | Global     | 0         | 3     | Socio-demographic Index                                | 664             |
| Pneumoconiosis                        | Female | 15-19 years | 95+ years | Data Rich  | 1         | 1     | Asbestos consumption (metric tons per year per capita) | 260             |
| Pneumoconiosis                        | Female | 15-19 years | 95+ years | Data Rich  | 1         | 1     | Coal Production (per capita)                           | --              |
| Pneumoconiosis                        | Female | 15-19 years | 95+ years | Data Rich  | 1         | 1     | Gold production (kg) per capita                        | --              |
| Pneumoconiosis                        | Female | 15-19 years | 95+ years | Data Rich  | -1        | 2     | Healthcare access and quality index                    | 43              |
| Pneumoconiosis                        | Female | 15-19 years | 95+ years | Data Rich  | 1         | 2     | Cumulative Cigarettes (5 Years)                        | 38              |
| Pneumoconiosis                        | Female | 15-19 years | 95+ years | Data Rich  | 1         | 2     | Indoor Air Pollution (All Cooking Fuels)               | 38              |
| Pneumoconiosis                        | Female | 15-19 years | 95+ years | Data Rich  | 1         | 2     | Smoking Prevalence                                     | 404             |
| Pneumoconiosis                        | Female | 15-19 years | 95+ years | Data Rich  | -1        | 3     | Education (years per capita)                           | 106             |
| Pneumoconiosis                        | Female | 15-19 years | 95+ years | Data Rich  | -1        | 3     | Socio-demographic Index                                | 430             |
| Pneumoconiosis                        | Female | 15-19 years | 95+ years | Data Rich  | -1        | 3     | LDI (I\$ per capita)                                   | --              |
| Pneumoconiosis                        | Female | 15-19 years | 95+ years | Global     | 1         | 1     | Asbestos consumption (metric tons per                  | 1000            |

| Cause          | Sex    | Age Start   | Age End   | Model Type | Direction | Level | Covariate Name                                         | Number of Draws |
|----------------|--------|-------------|-----------|------------|-----------|-------|--------------------------------------------------------|-----------------|
|                |        |             |           |            |           |       | year per capita)                                       |                 |
| Pneumoconiosis | Female | 15-19 years | 95+ years | Global     | 1         | 1     | Coal Production (per capita)                           | --              |
| Pneumoconiosis | Female | 15-19 years | 95+ years | Global     | 1         | 1     | Gold production (kg) per capita                        | --              |
| Pneumoconiosis | Female | 15-19 years | 95+ years | Global     | -1        | 2     | Healthcare access and quality index                    | 190             |
| Pneumoconiosis | Female | 15-19 years | 95+ years | Global     | 1         | 2     | Cumulative Cigarettes (5 Years)                        | 24              |
| Pneumoconiosis | Female | 15-19 years | 95+ years | Global     | 1         | 2     | Indoor Air Pollution (All Cooking Fuels)               | 24              |
| Pneumoconiosis | Female | 15-19 years | 95+ years | Global     | 1         | 2     | Smoking Prevalence                                     | 193             |
| Pneumoconiosis | Female | 15-19 years | 95+ years | Global     | -1        | 3     | Socio-demographic Index                                | 144             |
| Pneumoconiosis | Female | 15-19 years | 95+ years | Global     | -1        | 3     | Education (years per capita)                           | 266             |
| Pneumoconiosis | Female | 15-19 years | 95+ years | Global     | -1        | 3     | LDI (I\$ per capita)                                   | --              |
| Pneumoconiosis | Male   | 15-19 years | 95+ years | Data Rich  | 1         | 1     | Asbestos consumption (metric tons per year per capita) | 365             |
| Pneumoconiosis | Male   | 15-19 years | 95+ years | Data Rich  | 1         | 1     | Coal Production (per capita)                           | 805             |
| Pneumoconiosis | Male   | 15-19 years | 95+ years | Data Rich  | 1         | 1     | Gold production (kg) per capita                        | --              |
| Pneumoconiosis | Male   | 15-19 years | 95+ years | Data Rich  | -1        | 2     | Healthcare access and quality index                    | 34              |
| Pneumoconiosis | Male   | 15-19 years | 95+ years | Data Rich  | 1         | 2     | Indoor Air Pollution (All Cooking Fuels)               | 0               |
| Pneumoconiosis | Male   | 15-19 years | 95+ years | Data Rich  | 1         | 2     | Smoking Prevalence                                     | 154             |
| Pneumoconiosis | Male   | 15-19 years | 95+ years | Data Rich  | 1         | 2     | Cumulative Cigarettes (5 Years)                        | 167             |
| Pneumoconiosis | Male   | 15-19 years | 95+ years | Data Rich  | -1        | 3     | Socio-demographic Index                                | 29              |
| Pneumoconiosis | Male   | 15-19 years | 95+ years | Data Rich  | -1        | 3     | Education (years per capita)                           | 323             |
| Pneumoconiosis | Male   | 15-19 years | 95+ years | Data Rich  | -1        | 3     | LDI (I\$ per capita)                                   | --              |
| Pneumoconiosis | Male   | 15-19 years | 95+ years | Global     | 1         | 1     | Coal Production (per capita)                           | 567             |
| Pneumoconiosis | Male   | 15-19 years | 95+ years | Global     | 1         | 1     | Asbestos consumption (metric tons per year per capita) | 750             |
| Pneumoconiosis | Male   | 15-19 years | 95+ years | Global     | 1         | 1     | Gold production (kg) per capita                        | --              |
| Pneumoconiosis | Male   | 15-19 years | 95+ years | Global     | -1        | 2     | Healthcare access and quality index                    | 160             |
| Pneumoconiosis | Male   | 15-19 years | 95+ years | Global     | 1         | 2     | Indoor Air Pollution (All Cooking Fuels)               | 2               |
| Pneumoconiosis | Male   | 15-19 years | 95+ years | Global     | 1         | 2     | Smoking Prevalence                                     | 126             |
| Pneumoconiosis | Male   | 15-19 years | 95+ years | Global     | 1         | 2     | Cumulative Cigarettes (5 Years)                        | 154             |

| Cause          | Sex    | Age Start   | Age End   | Model Type | Direction | Level | Covariate Name                           | Number of Draws |
|----------------|--------|-------------|-----------|------------|-----------|-------|------------------------------------------|-----------------|
| Pneumoconiosis | Male   | 15-19 years | 95+ years | Global     | -1        | 3     | Education (years per capita)             | 299             |
| Pneumoconiosis | Male   | 15-19 years | 95+ years | Global     | -1        | 3     | Socio-demographic Index                  | 413             |
| Pneumoconiosis | Male   | 15-19 years | 95+ years | Global     | -1        | 3     | LDI (I\$ per capita)                     | --              |
| Silicosis      | Female | 15-19 years | 95+ years | Data Rich  | 1         | 1     | Gold production (kg) per capita          | --              |
| Silicosis      | Female | 15-19 years | 95+ years | Data Rich  | -1        | 2     | Healthcare access and quality index      | 568             |
| Silicosis      | Female | 15-19 years | 95+ years | Data Rich  | 1         | 2     | Cumulative Cigarettes (5 Years)          | --              |
| Silicosis      | Female | 15-19 years | 95+ years | Data Rich  | 1         | 2     | Indoor Air Pollution (All Cooking Fuels) | --              |
| Silicosis      | Female | 15-19 years | 95+ years | Data Rich  | 1         | 2     | Smoking Prevalence                       | --              |
| Silicosis      | Female | 15-19 years | 95+ years | Data Rich  | -1        | 3     | Socio-demographic Index                  | 568             |
| Silicosis      | Female | 15-19 years | 95+ years | Data Rich  | -1        | 3     | Education (years per capita)             | --              |
| Silicosis      | Female | 15-19 years | 95+ years | Data Rich  | -1        | 3     | LDI (I\$ per capita)                     | --              |
| Silicosis      | Female | 15-19 years | 95+ years | Global     | 1         | 1     | Gold production (kg) per capita          | --              |
| Silicosis      | Female | 15-19 years | 95+ years | Global     | -1        | 2     | Healthcare access and quality index      | 546             |
| Silicosis      | Female | 15-19 years | 95+ years | Global     | 1         | 2     | Cumulative Cigarettes (5 Years)          | --              |
| Silicosis      | Female | 15-19 years | 95+ years | Global     | 1         | 2     | Indoor Air Pollution (All Cooking Fuels) | --              |
| Silicosis      | Female | 15-19 years | 95+ years | Global     | 1         | 2     | Smoking Prevalence                       | --              |
| Silicosis      | Female | 15-19 years | 95+ years | Global     | -1        | 3     | Socio-demographic Index                  | 546             |
| Silicosis      | Female | 15-19 years | 95+ years | Global     | -1        | 3     | Education (years per capita)             | --              |
| Silicosis      | Female | 15-19 years | 95+ years | Global     | -1        | 3     | LDI (I\$ per capita)                     | --              |
| Silicosis      | Male   | 15-19 years | 95+ years | Data Rich  | 1         | 1     | Gold production (kg) per capita          | 823             |
| Silicosis      | Male   | 15-19 years | 95+ years | Data Rich  | -1        | 2     | Healthcare access and quality index      | 110             |
| Silicosis      | Male   | 15-19 years | 95+ years | Data Rich  | 1         | 2     | Indoor Air Pollution (All Cooking Fuels) | 10              |
| Silicosis      | Male   | 15-19 years | 95+ years | Data Rich  | 1         | 2     | Cumulative Cigarettes (5 Years)          | 70              |
| Silicosis      | Male   | 15-19 years | 95+ years | Data Rich  | 1         | 2     | Smoking Prevalence                       | 504             |
| Silicosis      | Male   | 15-19 years | 95+ years | Data Rich  | -1        | 3     | Education (years per capita)             | 277             |
| Silicosis      | Male   | 15-19 years | 95+ years | Data Rich  | -1        | 3     | Socio-demographic Index                  | 384             |
| Silicosis      | Male   | 15-19 years | 95+ years | Data Rich  | -1        | 3     | LDI (I\$ per capita)                     | --              |
| Silicosis      | Male   | 15-19       | 95+ years | Global     | 1         | 1     | Gold production (kg)                     | 1000            |

| Cause      | Sex    | Age Start   | Age End   | Model Type | Direction | Level | Covariate Name                                         | Number of Draws |
|------------|--------|-------------|-----------|------------|-----------|-------|--------------------------------------------------------|-----------------|
|            |        | years       |           |            |           |       | per capita                                             |                 |
| Silicosis  | Male   | 15-19 years | 95+ years | Global     | -1        | 2     | Healthcare access and quality index                    | 321             |
| Silicosis  | Male   | 15-19 years | 95+ years | Global     | 1         | 2     | Indoor Air Pollution (All Cooking Fuels)               | 121             |
| Silicosis  | Male   | 15-19 years | 95+ years | Global     | 1         | 2     | Cumulative Cigarettes (5 Years)                        | 215             |
| Silicosis  | Male   | 15-19 years | 95+ years | Global     | 1         | 2     | Smoking Prevalence                                     | --              |
| Silicosis  | Male   | 15-19 years | 95+ years | Global     | -1        | 3     | Socio-demographic Index                                | 192             |
| Silicosis  | Male   | 15-19 years | 95+ years | Global     | -1        | 3     | Education (years per capita)                           | 225             |
| Silicosis  | Male   | 15-19 years | 95+ years | Global     | -1        | 3     | LDI (I\$ per capita)                                   | --              |
| Asbestosis | Female | 15-19 years | 95+ years | Data Rich  | 1         | 1     | Asbestos consumption (metric tons per year per capita) | --              |
| Asbestosis | Female | 15-19 years | 95+ years | Data Rich  | -1        | 2     | Healthcare access and quality index                    | --              |
| Asbestosis | Female | 15-19 years | 95+ years | Data Rich  | 1         | 2     | Elevation Over 1500m (proportion)                      | 744             |
| Asbestosis | Female | 15-19 years | 95+ years | Data Rich  | 1         | 2     | Cumulative Cigarettes (10 Years)                       | --              |
| Asbestosis | Female | 15-19 years | 95+ years | Data Rich  | 1         | 2     | Cumulative Cigarettes (5 Years)                        | --              |
| Asbestosis | Female | 15-19 years | 95+ years | Data Rich  | 1         | 2     | Elevation 500 to 1500m (proportion)                    | --              |
| Asbestosis | Female | 15-19 years | 95+ years | Data Rich  | 1         | 2     | Indoor Air Pollution (All Cooking Fuels)               | --              |
| Asbestosis | Female | 15-19 years | 95+ years | Data Rich  | 1         | 2     | Smoking Prevalence                                     | --              |
| Asbestosis | Female | 15-19 years | 95+ years | Data Rich  | -1        | 3     | Education (years per capita)                           | --              |
| Asbestosis | Female | 15-19 years | 95+ years | Data Rich  | -1        | 3     | LDI (I\$ per capita)                                   | --              |
| Asbestosis | Female | 15-19 years | 95+ years | Data Rich  | -1        | 3     | Socio-demographic Index                                | --              |
| Asbestosis | Female | 15-19 years | 95+ years | Global     | 1         | 1     | Asbestos consumption (metric tons per year per capita) | --              |
| Asbestosis | Female | 15-19 years | 95+ years | Global     | -1        | 2     | Healthcare access and quality index                    | 546             |
| Asbestosis | Female | 15-19 years | 95+ years | Global     | 1         | 2     | Elevation Over 1500m (proportion)                      | 546             |
| Asbestosis | Female | 15-19 years | 95+ years | Global     | 1         | 2     | Cumulative Cigarettes (10 Years)                       | --              |
| Asbestosis | Female | 15-19 years | 95+ years | Global     | 1         | 2     | Cumulative Cigarettes (5 Years)                        | --              |
| Asbestosis | Female | 15-19 years | 95+ years | Global     | 1         | 2     | Elevation 500 to 1500m (proportion)                    | --              |
| Asbestosis | Female | 15-19 years | 95+ years | Global     | 1         | 2     | Indoor Air Pollution (All Cooking Fuels)               | --              |
| Asbestosis | Female | 15-19 years | 95+ years | Global     | 1         | 2     | Smoking Prevalence                                     | --              |

| Cause                       | Sex    | Age Start   | Age End   | Model Type | Direction | Level | Covariate Name                                         | Number of Draws |
|-----------------------------|--------|-------------|-----------|------------|-----------|-------|--------------------------------------------------------|-----------------|
| Asbestosis                  | Female | 15-19 years | 95+ years | Global     | -1        | 3     | Education (years per capita)                           | --              |
| Asbestosis                  | Female | 15-19 years | 95+ years | Global     | -1        | 3     | LDI (I\$ per capita)                                   | --              |
| Asbestosis                  | Female | 15-19 years | 95+ years | Global     | -1        | 3     | Socio-demographic Index                                | --              |
| Asbestosis                  | Male   | 15-19 years | 95+ years | Data Rich  | 1         | 1     | Asbestos consumption (metric tons per year per capita) | --              |
| Asbestosis                  | Male   | 15-19 years | 95+ years | Data Rich  | 1         | 1     | Smoking Prevalence                                     | --              |
| Asbestosis                  | Male   | 15-19 years | 95+ years | Data Rich  | -1        | 2     | Healthcare access and quality index                    | --              |
| Asbestosis                  | Male   | 15-19 years | 95+ years | Data Rich  | 1         | 2     | Elevation 500 to 1500m (proportion)                    | 516             |
| Asbestosis                  | Male   | 15-19 years | 95+ years | Data Rich  | 1         | 2     | Elevation Over 1500m (proportion)                      | 516             |
| Asbestosis                  | Male   | 15-19 years | 95+ years | Data Rich  | 1         | 2     | Cumulative Cigarettes (5 Years)                        | --              |
| Asbestosis                  | Male   | 15-19 years | 95+ years | Data Rich  | 1         | 2     | Indoor Air Pollution (All Cooking Fuels)               | --              |
| Asbestosis                  | Male   | 15-19 years | 95+ years | Data Rich  | -1        | 3     | Education (years per capita)                           | --              |
| Asbestosis                  | Male   | 15-19 years | 95+ years | Data Rich  | -1        | 3     | LDI (I\$ per capita)                                   | --              |
| Asbestosis                  | Male   | 15-19 years | 95+ years | Data Rich  | 0         | 3     | Socio-demographic Index                                | 742             |
| Asbestosis                  | Male   | 15-19 years | 95+ years | Global     | 1         | 1     | Asbestos consumption (metric tons per year per capita) | --              |
| Asbestosis                  | Male   | 15-19 years | 95+ years | Global     | -1        | 2     | Healthcare access and quality index                    | --              |
| Asbestosis                  | Male   | 15-19 years | 95+ years | Global     | 1         | 2     | Elevation 500 to 1500m (proportion)                    | 1000            |
| Asbestosis                  | Male   | 15-19 years | 95+ years | Global     | 1         | 2     | Elevation Over 1500m (proportion)                      | 1000            |
| Asbestosis                  | Male   | 15-19 years | 95+ years | Global     | 1         | 2     | Cumulative Cigarettes (5 Years)                        | --              |
| Asbestosis                  | Male   | 15-19 years | 95+ years | Global     | 1         | 2     | Indoor Air Pollution (All Cooking Fuels)               | --              |
| Asbestosis                  | Male   | 15-19 years | 95+ years | Global     | 1         | 2     | Smoking Prevalence                                     | --              |
| Asbestosis                  | Male   | 15-19 years | 95+ years | Global     | -1        | 3     | Education (years per capita)                           | --              |
| Asbestosis                  | Male   | 15-19 years | 95+ years | Global     | -1        | 3     | LDI (I\$ per capita)                                   | --              |
| Asbestosis                  | Male   | 15-19 years | 95+ years | Global     | -1        | 3     | Socio-demographic Index                                | --              |
| Coal workers pneumoconiosis | Female | 15-19 years | 95+ years | Data Rich  | 1         | 1     | Coal Production (per capita)                           | --              |
| Coal workers pneumoconiosis | Female | 15-19 years | 95+ years | Data Rich  | -1        | 2     | Healthcare access and quality index                    | 325             |
| Coal workers pneumoconiosis | Female | 15-19 years | 95+ years | Data Rich  | 1         | 2     | Smoking Prevalence                                     | 325             |
| Coal workers                | Female | 15-19       | 95+ years | Data Rich  | 1         | 2     | Cumulative Cigarettes                                  | --              |

| Cause                       | Sex    | Age Start   | Age End   | Model Type | Direction | Level | Covariate Name                           | Number of Draws |
|-----------------------------|--------|-------------|-----------|------------|-----------|-------|------------------------------------------|-----------------|
| pneumoconiosis              |        | years       |           |            |           |       | (5 Years)                                |                 |
| Coal workers pneumoconiosis | Female | 15-19 years | 95+ years | Data Rich  | 1         | 2     | Indoor Air Pollution (All Cooking Fuels) | --              |
| Coal workers pneumoconiosis | Female | 15-19 years | 95+ years | Data Rich  | -1        | 3     | Education (years per capita)             | --              |
| Coal workers pneumoconiosis | Female | 15-19 years | 95+ years | Data Rich  | -1        | 3     | LDI (I\$ per capita)                     | --              |
| Coal workers pneumoconiosis | Female | 15-19 years | 95+ years | Data Rich  | -1        | 3     | Socio-demographic Index                  | --              |
| Coal workers pneumoconiosis | Female | 15-19 years | 95+ years | Global     | 1         | 1     | Coal Production (per capita)             | --              |
| Coal workers pneumoconiosis | Female | 15-19 years | 95+ years | Global     | -1        | 2     | Healthcare access and quality index      | 105             |
| Coal workers pneumoconiosis | Female | 15-19 years | 95+ years | Global     | 1         | 2     | Smoking Prevalence                       | 354             |
| Coal workers pneumoconiosis | Female | 15-19 years | 95+ years | Global     | 1         | 2     | Cumulative Cigarettes (5 Years)          | --              |
| Coal workers pneumoconiosis | Female | 15-19 years | 95+ years | Global     | 1         | 2     | Indoor Air Pollution (All Cooking Fuels) | --              |
| Coal workers pneumoconiosis | Female | 15-19 years | 95+ years | Global     | -1        | 3     | Socio-demographic Index                  | 281             |
| Coal workers pneumoconiosis | Female | 15-19 years | 95+ years | Global     | -1        | 3     | Education (years per capita)             | --              |
| Coal workers pneumoconiosis | Female | 15-19 years | 95+ years | Global     | -1        | 3     | LDI (I\$ per capita)                     | --              |
| Coal workers pneumoconiosis | Male   | 15-19 years | 95+ years | Data Rich  | 1         | 1     | Coal Production (per capita)             | 1000            |
| Coal workers pneumoconiosis | Male   | 15-19 years | 95+ years | Data Rich  | -1        | 2     | Healthcare access and quality index      | 327             |
| Coal workers pneumoconiosis | Male   | 15-19 years | 95+ years | Data Rich  | 1         | 2     | Indoor Air Pollution (All Cooking Fuels) | 68              |
| Coal workers pneumoconiosis | Male   | 15-19 years | 95+ years | Data Rich  | 1         | 2     | Cumulative Cigarettes (5 Years)          | 250             |
| Coal workers pneumoconiosis | Male   | 15-19 years | 95+ years | Data Rich  | 1         | 2     | Smoking Prevalence                       | 274             |
| Coal workers pneumoconiosis | Male   | 15-19 years | 95+ years | Data Rich  | -1        | 3     | Socio-demographic Index                  | 195             |
| Coal workers pneumoconiosis | Male   | 15-19 years | 95+ years | Data Rich  | -1        | 3     | Education (years per capita)             | 464             |
| Coal workers pneumoconiosis | Male   | 15-19 years | 95+ years | Data Rich  | -1        | 3     | LDI (I\$ per capita)                     | --              |
| Coal workers pneumoconiosis | Male   | 15-19 years | 95+ years | Global     | 1         | 1     | Coal Production (per capita)             | 1000            |
| Coal workers pneumoconiosis | Male   | 15-19 years | 95+ years | Global     | -1        | 2     | Healthcare access and quality index      | 461             |
| Coal workers pneumoconiosis | Male   | 15-19 years | 95+ years | Global     | 1         | 2     | Indoor Air Pollution (All Cooking Fuels) | 64              |
| Coal workers pneumoconiosis | Male   | 15-19 years | 95+ years | Global     | 1         | 2     | Cumulative Cigarettes (5 Years)          | 334             |
| Coal workers pneumoconiosis | Male   | 15-19 years | 95+ years | Global     | 1         | 2     | Smoking Prevalence                       | 339             |
| Coal workers pneumoconiosis | Male   | 15-19 years | 95+ years | Global     | -1        | 3     | Socio-demographic Index                  | 191             |
| Coal workers pneumoconiosis | Male   | 15-19 years | 95+ years | Global     | -1        | 3     | Education (years per capita)             | 232             |

| Cause                       | Sex    | Age Start   | Age End   | Model Type | Direction | Level | Covariate Name                           | Number of Draws |
|-----------------------------|--------|-------------|-----------|------------|-----------|-------|------------------------------------------|-----------------|
| Coal workers pneumoconiosis | Male   | 15-19 years | 95+ years | Global     | -1        | 3     | LDI (I\$ per capita)                     | --              |
| Other pneumoconiosis        | Female | 15-19 years | 95+ years | Data Rich  | -1        | 2     | Healthcare access and quality index      | 89              |
| Other pneumoconiosis        | Female | 15-19 years | 95+ years | Data Rich  | 1         | 2     | Indoor Air Pollution (All Cooking Fuels) | 38              |
| Other pneumoconiosis        | Female | 15-19 years | 95+ years | Data Rich  | 1         | 2     | Smoking Prevalence                       | 408             |
| Other pneumoconiosis        | Female | 15-19 years | 95+ years | Data Rich  | 1         | 2     | Cumulative Cigarettes (5 Years)          | 575             |
| Other pneumoconiosis        | Female | 15-19 years | 95+ years | Data Rich  | -1        | 3     | Socio-demographic Index                  | 137             |
| Other pneumoconiosis        | Female | 15-19 years | 95+ years | Data Rich  | -1        | 3     | Education (years per capita)             | --              |
| Other pneumoconiosis        | Female | 15-19 years | 95+ years | Data Rich  | -1        | 3     | LDI (I\$ per capita)                     | --              |
| Other pneumoconiosis        | Female | 15-19 years | 95+ years | Global     | -1        | 2     | Healthcare access and quality index      | 38              |
| Other pneumoconiosis        | Female | 15-19 years | 95+ years | Global     | 1         | 2     | Indoor Air Pollution (All Cooking Fuels) | 63              |
| Other pneumoconiosis        | Female | 15-19 years | 95+ years | Global     | 1         | 2     | Cumulative Cigarettes (5 Years)          | 431             |
| Other pneumoconiosis        | Female | 15-19 years | 95+ years | Global     | 1         | 2     | Smoking Prevalence                       | 625             |
| Other pneumoconiosis        | Female | 15-19 years | 95+ years | Global     | -1        | 3     | Education (years per capita)             | 22              |
| Other pneumoconiosis        | Female | 15-19 years | 95+ years | Global     | -1        | 3     | Socio-demographic Index                  | 236             |
| Other pneumoconiosis        | Female | 15-19 years | 95+ years | Global     | -1        | 3     | LDI (I\$ per capita)                     | --              |
| Other pneumoconiosis        | Male   | 15-19 years | 95+ years | Data Rich  | -1        | 2     | Healthcare access and quality index      | 508             |
| Other pneumoconiosis        | Male   | 15-19 years | 95+ years | Data Rich  | 1         | 2     | Indoor Air Pollution (All Cooking Fuels) | 169             |
| Other pneumoconiosis        | Male   | 15-19 years | 95+ years | Data Rich  | 1         | 2     | Cumulative Cigarettes (5 Years)          | 323             |
| Other pneumoconiosis        | Male   | 15-19 years | 95+ years | Data Rich  | 1         | 2     | Smoking Prevalence                       | 323             |
| Other pneumoconiosis        | Male   | 15-19 years | 95+ years | Data Rich  | -1        | 3     | Education (years per capita)             | 141             |
| Other pneumoconiosis        | Male   | 15-19 years | 95+ years | Data Rich  | -1        | 3     | LDI (I\$ per capita)                     | --              |
| Other pneumoconiosis        | Male   | 15-19 years | 95+ years | Data Rich  | -1        | 3     | Socio-demographic Index                  | --              |
| Other pneumoconiosis        | Male   | 15-19 years | 95+ years | Global     | -1        | 2     | Healthcare access and quality index      | 265             |
| Other pneumoconiosis        | Male   | 15-19 years | 95+ years | Global     | 1         | 2     | Indoor Air Pollution (All Cooking Fuels) | 216             |
| Other pneumoconiosis        | Male   | 15-19 years | 95+ years | Global     | 1         | 2     | Cumulative Cigarettes (5 Years)          | 435             |
| Other pneumoconiosis        | Male   | 15-19 years | 95+ years | Global     | 1         | 2     | Smoking Prevalence                       | 719             |
| Other pneumoconiosis        | Male   | 15-19 years | 95+ years | Global     | -1        | 3     | Socio-demographic Index                  | 52              |
| Other pneumoconiosis        | Male   | 15-19 years | 95+ years | Global     | -1        | 3     | Education (years per                     | 201             |

| Cause                | Sex    | Age Start   | Age End   | Model Type | Direction | Level | Covariate Name                           | Number of Draws |
|----------------------|--------|-------------|-----------|------------|-----------|-------|------------------------------------------|-----------------|
|                      |        | years       |           |            |           |       | capita)                                  |                 |
| Other pneumoconiosis | Male   | 15-19 years | 95+ years | Global     | -1        | 3     | LDI (I\$ per capita)                     | --              |
| Asthma               | Female | 1-4 years   | 95+ years | Data Rich  | -1        | 1     | Healthcare access and quality index      | 566             |
| Asthma               | Female | 1-4 years   | 95+ years | Data Rich  | 1         | 1     | Cumulative Cigarettes (10 Years)         | 108             |
| Asthma               | Female | 1-4 years   | 95+ years | Data Rich  | 1         | 1     | Cumulative Cigarettes (5 Years)          | 199             |
| Asthma               | Female | 1-4 years   | 95+ years | Data Rich  | 1         | 1     | Log-transformed SEV scalar: Asthma       | --              |
| Asthma               | Female | 1-4 years   | 95+ years | Data Rich  | 1         | 2     | Smoking Prevalence                       | 5               |
| Asthma               | Female | 1-4 years   | 95+ years | Data Rich  | 1         | 2     | Indoor Air Pollution (All Cooking Fuels) | 29              |
| Asthma               | Female | 1-4 years   | 95+ years | Data Rich  | 1         | 2     | Outdoor Air Pollution (PM2.5)            | 537             |
| Asthma               | Female | 1-4 years   | 95+ years | Data Rich  | -1        | 3     | Socio-demographic Index                  | 2               |
| Asthma               | Female | 1-4 years   | 95+ years | Data Rich  | -1        | 3     | Education (years per capita)             | 180             |
| Asthma               | Female | 1-4 years   | 95+ years | Data Rich  | -1        | 3     | LDI (I\$ per capita)                     | --              |
| Asthma               | Female | 1-4 years   | 95+ years | Global     | -1        | 1     | Healthcare access and quality index      | 593             |
| Asthma               | Female | 1-4 years   | 95+ years | Global     | 1         | 1     | Cumulative Cigarettes (5 Years)          | 145             |
| Asthma               | Female | 1-4 years   | 95+ years | Global     | 1         | 1     | Cumulative Cigarettes (10 Years)         | 160             |
| Asthma               | Female | 1-4 years   | 95+ years | Global     | 1         | 1     | Log-transformed SEV scalar: Asthma       | --              |
| Asthma               | Female | 1-4 years   | 95+ years | Global     | 1         | 2     | Smoking Prevalence                       | 2               |
| Asthma               | Female | 1-4 years   | 95+ years | Global     | 1         | 2     | Indoor Air Pollution (All Cooking Fuels) | 91              |
| Asthma               | Female | 1-4 years   | 95+ years | Global     | 1         | 2     | Outdoor Air Pollution (PM2.5)            | 300             |
| Asthma               | Female | 1-4 years   | 95+ years | Global     | -1        | 3     | Socio-demographic Index                  | 12              |
| Asthma               | Female | 1-4 years   | 95+ years | Global     | -1        | 3     | Education (years per capita)             | 273             |
| Asthma               | Female | 1-4 years   | 95+ years | Global     | -1        | 3     | LDI (I\$ per capita)                     | --              |
| Asthma               | Male   | 1-4 years   | 95+ years | Data Rich  | -1        | 1     | Healthcare access and quality index      | 159             |
| Asthma               | Male   | 1-4 years   | 95+ years | Data Rich  | 1         | 1     | Cumulative Cigarettes (5 Years)          | 143             |
| Asthma               | Male   | 1-4 years   | 95+ years | Data Rich  | 1         | 1     | Cumulative Cigarettes (10 Years)         | 283             |
| Asthma               | Male   | 1-4 years   | 95+ years | Data Rich  | 1         | 1     | Log-transformed SEV scalar: Asthma       | --              |
| Asthma               | Male   | 1-4 years   | 95+ years | Data Rich  | 1         | 2     | Outdoor Air Pollution (PM2.5)            | 9               |
| Asthma               | Male   | 1-4 years   | 95+ years | Data Rich  | 1         | 2     | Smoking Prevalence                       | 27              |
| Asthma               | Male   | 1-4 years   | 95+ years | Data Rich  | 1         | 2     | Indoor Air Pollution (All Cooking Fuels) | 110             |
| Asthma               | Male   | 1-4 years   | 95+ years | Data Rich  | -1        | 3     | Socio-demographic Index                  | 432             |
| Asthma               | Male   | 1-4 years   | 95+ years | Data Rich  | -1        | 3     | Education (years per                     | 571             |

| Cause                                               | Sex    | Age Start | Age End   | Model Type | Direction | Level | Covariate Name                           | Number of Draws |
|-----------------------------------------------------|--------|-----------|-----------|------------|-----------|-------|------------------------------------------|-----------------|
|                                                     |        |           |           |            |           |       | capita)                                  |                 |
| Asthma                                              | Male   | 1-4 years | 95+ years | Data Rich  | -1        | 3     | LDI (I\$ per capita)                     | --              |
| Asthma                                              | Male   | 1-4 years | 95+ years | Global     | -1        | 1     | Healthcare access and quality index      | 788             |
| Asthma                                              | Male   | 1-4 years | 95+ years | Global     | 1         | 1     | Cumulative Cigarettes (5 Years)          | 268             |
| Asthma                                              | Male   | 1-4 years | 95+ years | Global     | 1         | 1     | Cumulative Cigarettes (10 Years)         | 427             |
| Asthma                                              | Male   | 1-4 years | 95+ years | Global     | 1         | 1     | Log-transformed SEV scalar: Asthma       | --              |
| Asthma                                              | Male   | 1-4 years | 95+ years | Global     | 1         | 2     | Smoking Prevalence                       | 63              |
| Asthma                                              | Male   | 1-4 years | 95+ years | Global     | 1         | 2     | Indoor Air Pollution (All Cooking Fuels) | 70              |
| Asthma                                              | Male   | 1-4 years | 95+ years | Global     | 1         | 2     | Outdoor Air Pollution (PM2.5)            | 198             |
| Asthma                                              | Male   | 1-4 years | 95+ years | Global     | -1        | 3     | Socio-demographic Index                  | 76              |
| Asthma                                              | Male   | 1-4 years | 95+ years | Global     | -1        | 3     | Education (years per capita)             | 549             |
| Asthma                                              | Male   | 1-4 years | 95+ years | Global     | -1        | 3     | LDI (I\$ per capita)                     | --              |
| Interstitial lung disease and pulmonary sarcoidosis | Female | 1-4 years | 95+ years | Data Rich  | 1         | 1     | Log-transformed SEV scalar: ILD          | 414             |
| Interstitial lung disease and pulmonary sarcoidosis | Female | 1-4 years | 95+ years | Data Rich  | 1         | 1     | Cumulative Cigarettes (10 Years)         | --              |
| Interstitial lung disease and pulmonary sarcoidosis | Female | 1-4 years | 95+ years | Data Rich  | 1         | 1     | Cumulative Cigarettes (5 Years)          | --              |
| Interstitial lung disease and pulmonary sarcoidosis | Female | 1-4 years | 95+ years | Data Rich  | 1         | 1     | Smoking Prevalence                       | --              |
| Interstitial lung disease and pulmonary sarcoidosis | Female | 1-4 years | 95+ years | Data Rich  | -1        | 2     | Healthcare access and quality index      | --              |
| Interstitial lung disease and pulmonary sarcoidosis | Female | 1-4 years | 95+ years | Data Rich  | 1         | 2     | Outdoor Air Pollution (PM2.5)            | 586             |
| Interstitial lung disease and pulmonary sarcoidosis | Female | 1-4 years | 95+ years | Data Rich  | 1         | 2     | Indoor Air Pollution (All Cooking Fuels) | --              |
| Interstitial lung disease and pulmonary sarcoidosis | Female | 1-4 years | 95+ years | Data Rich  | -1        | 3     | Education (years per capita)             | --              |
| Interstitial lung disease and pulmonary sarcoidosis | Female | 1-4 years | 95+ years | Data Rich  | -1        | 3     | LDI (I\$ per capita)                     | --              |
| Interstitial lung disease and pulmonary sarcoidosis | Female | 1-4 years | 95+ years | Data Rich  | 0         | 3     | Socio-demographic Index                  | 618             |
| Interstitial lung disease and pulmonary sarcoidosis | Female | 1-4 years | 95+ years | Global     | 1         | 1     | Outdoor Air Pollution (PM2.5)            | 681             |
| Interstitial lung disease and pulmonary sarcoidosis | Female | 1-4 years | 95+ years | Global     | 1         | 1     | Log-transformed SEV scalar: ILD          | 739             |
| Interstitial lung disease and pulmonary sarcoidosis | Female | 1-4 years | 95+ years | Global     | 1         | 1     | Cumulative Cigarettes (10 Years)         | --              |
| Interstitial lung disease and pulmonary sarcoidosis | Female | 1-4 years | 95+ years | Global     | 1         | 1     | Cumulative Cigarettes (5 Years)          | --              |
| Interstitial lung disease and pulmonary sarcoidosis | Female | 1-4 years | 95+ years | Global     | 1         | 1     | Indoor Air Pollution (All Cooking Fuels) | --              |
| Interstitial lung disease and pulmonary sarcoidosis | Female | 1-4 years | 95+ years | Global     | 1         | 1     | Smoking Prevalence                       | --              |
| Interstitial lung disease and pulmonary sarcoidosis | Female | 1-4 years | 95+ years | Global     | -1        | 2     | Healthcare access and quality index      | --              |
| Interstitial lung disease and                       | Female | 1-4 years | 95+ years | Global     | -1        | 3     | Education (years per                     | --              |

| Cause                                               | Sex    | Age Start | Age End   | Model Type | Direction | Level | Covariate Name                           | Number of Draws |
|-----------------------------------------------------|--------|-----------|-----------|------------|-----------|-------|------------------------------------------|-----------------|
| pulmonary sarcoidosis                               |        |           |           |            |           |       | capita)                                  |                 |
| Interstitial lung disease and pulmonary sarcoidosis | Female | 1-4 years | 95+ years | Global     | -1        | 3     | LDI (I\$ per capita)                     | --              |
| Interstitial lung disease and pulmonary sarcoidosis | Female | 1-4 years | 95+ years | Global     | 0         | 3     | Socio-demographic Index                  | 693             |
| Interstitial lung disease and pulmonary sarcoidosis | Male   | 1-4 years | 95+ years | Data Rich  | 1         | 1     | Cumulative Cigarettes (10 Years)         | --              |
| Interstitial lung disease and pulmonary sarcoidosis | Male   | 1-4 years | 95+ years | Data Rich  | 1         | 1     | Cumulative Cigarettes (5 Years)          | --              |
| Interstitial lung disease and pulmonary sarcoidosis | Male   | 1-4 years | 95+ years | Data Rich  | 1         | 1     | Log-transformed SEV scalar: ILD          | --              |
| Interstitial lung disease and pulmonary sarcoidosis | Male   | 1-4 years | 95+ years | Data Rich  | 1         | 1     | Smoking Prevalence                       | --              |
| Interstitial lung disease and pulmonary sarcoidosis | Male   | 1-4 years | 95+ years | Data Rich  | -1        | 2     | Healthcare access and quality index      | --              |
| Interstitial lung disease and pulmonary sarcoidosis | Male   | 1-4 years | 95+ years | Data Rich  | 1         | 2     | Outdoor Air Pollution (PM2.5)            | 1000            |
| Interstitial lung disease and pulmonary sarcoidosis | Male   | 1-4 years | 95+ years | Data Rich  | 1         | 2     | Indoor Air Pollution (All Cooking Fuels) | --              |
| Interstitial lung disease and pulmonary sarcoidosis | Male   | 1-4 years | 95+ years | Data Rich  | -1        | 3     | Education (years per capita)             | --              |
| Interstitial lung disease and pulmonary sarcoidosis | Male   | 1-4 years | 95+ years | Data Rich  | -1        | 3     | LDI (I\$ per capita)                     | --              |
| Interstitial lung disease and pulmonary sarcoidosis | Male   | 1-4 years | 95+ years | Data Rich  | 0         | 3     | Socio-demographic Index                  | 1000            |
| Interstitial lung disease and pulmonary sarcoidosis | Male   | 1-4 years | 95+ years | Global     | 1         | 1     | Cumulative Cigarettes (10 Years)         | --              |
| Interstitial lung disease and pulmonary sarcoidosis | Male   | 1-4 years | 95+ years | Global     | 1         | 1     | Cumulative Cigarettes (5 Years)          | --              |
| Interstitial lung disease and pulmonary sarcoidosis | Male   | 1-4 years | 95+ years | Global     | 1         | 1     | Log-transformed SEV scalar: ILD          | --              |
| Interstitial lung disease and pulmonary sarcoidosis | Male   | 1-4 years | 95+ years | Global     | 1         | 1     | Smoking Prevalence                       | --              |
| Interstitial lung disease and pulmonary sarcoidosis | Male   | 1-4 years | 95+ years | Global     | -1        | 2     | Healthcare access and quality index      | --              |
| Interstitial lung disease and pulmonary sarcoidosis | Male   | 1-4 years | 95+ years | Global     | 1         | 2     | Outdoor Air Pollution (PM2.5)            | 422             |
| Interstitial lung disease and pulmonary sarcoidosis | Male   | 1-4 years | 95+ years | Global     | 1         | 2     | Indoor Air Pollution (All Cooking Fuels) | --              |
| Interstitial lung disease and pulmonary sarcoidosis | Male   | 1-4 years | 95+ years | Global     | -1        | 3     | Education (years per capita)             | --              |
| Interstitial lung disease and pulmonary sarcoidosis | Male   | 1-4 years | 95+ years | Global     | -1        | 3     | LDI (I\$ per capita)                     | --              |
| Interstitial lung disease and pulmonary sarcoidosis | Male   | 1-4 years | 95+ years | Global     | 0         | 3     | Socio-demographic Index                  | 815             |
| Other chronic respiratory diseases                  | Female | 1-4 years | 95+ years | Data Rich  | 1         | 1     | Indoor Air Pollution (All Cooking Fuels) | 242             |
| Other chronic respiratory diseases                  | Female | 1-4 years | 95+ years | Data Rich  | 1         | 1     | Outdoor Air Pollution (PM2.5)            | 536             |
| Other chronic respiratory diseases                  | Female | 1-4 years | 95+ years | Data Rich  | 1         | 1     | Cumulative Cigarettes (5 Years)          | --              |
| Other chronic respiratory diseases                  | Female | 1-4 years | 95+ years | Data Rich  | 1         | 1     | Log-transformed SEV scalar: Oth Resp     | --              |
| Other chronic respiratory diseases                  | Female | 1-4 years | 95+ years | Data Rich  | 1         | 1     | Smoking Prevalence                       | --              |

| Cause                              | Sex    | Age Start | Age End   | Model Type | Direction | Level | Covariate Name                                      | Number of Draws |
|------------------------------------|--------|-----------|-----------|------------|-----------|-------|-----------------------------------------------------|-----------------|
| Other chronic respiratory diseases | Female | 1-4 years | 95+ years | Data Rich  | -1        | 2     | Healthcare access and quality index                 | 58              |
| Other chronic respiratory diseases | Female | 1-4 years | 95+ years | Data Rich  | 1         | 2     | Elevation Over 1500m (proportion)                   | 12              |
| Other chronic respiratory diseases | Female | 1-4 years | 95+ years | Data Rich  | 1         | 2     | Elevation 500 to 1500m (proportion)                 | 306             |
| Other chronic respiratory diseases | Female | 1-4 years | 95+ years | Data Rich  | 1         | 2     | Population Density (over 1000 ppl/sqkm, proportion) | --              |
| Other chronic respiratory diseases | Female | 1-4 years | 95+ years | Data Rich  | -1        | 3     | Education (years per capita)                        | 17              |
| Other chronic respiratory diseases | Female | 1-4 years | 95+ years | Data Rich  | -1        | 3     | Socio-demographic Index                             | 44              |
| Other chronic respiratory diseases | Female | 1-4 years | 95+ years | Data Rich  | -1        | 3     | LDI (I\$ per capita)                                | --              |
| Other chronic respiratory diseases | Female | 1-4 years | 95+ years | Global     | 1         | 1     | Indoor Air Pollution (All Cooking Fuels)            | 134             |
| Other chronic respiratory diseases | Female | 1-4 years | 95+ years | Global     | 1         | 1     | Cumulative Cigarettes (5 Years)                     | --              |
| Other chronic respiratory diseases | Female | 1-4 years | 95+ years | Global     | 1         | 1     | Log-transformed SEV scalar: Oth Resp                | --              |
| Other chronic respiratory diseases | Female | 1-4 years | 95+ years | Global     | 1         | 1     | Outdoor Air Pollution (PM2.5)                       | --              |
| Other chronic respiratory diseases | Female | 1-4 years | 95+ years | Global     | 1         | 1     | Smoking Prevalence                                  | --              |
| Other chronic respiratory diseases | Female | 1-4 years | 95+ years | Global     | -1        | 2     | Healthcare access and quality index                 | 215             |
| Other chronic respiratory diseases | Female | 1-4 years | 95+ years | Global     | 1         | 2     | Elevation 500 to 1500m (proportion)                 | 337             |
| Other chronic respiratory diseases | Female | 1-4 years | 95+ years | Global     | 1         | 2     | Elevation Over 1500m (proportion)                   | 405             |
| Other chronic respiratory diseases | Female | 1-4 years | 95+ years | Global     | 1         | 2     | Population Density (over 1000 ppl/sqkm, proportion) | --              |
| Other chronic respiratory diseases | Female | 1-4 years | 95+ years | Global     | -1        | 3     | Socio-demographic Index                             | 70              |
| Other chronic respiratory diseases | Female | 1-4 years | 95+ years | Global     | -1        | 3     | Education (years per capita)                        | 300             |
| Other chronic respiratory diseases | Female | 1-4 years | 95+ years | Global     | -1        | 3     | LDI (I\$ per capita)                                | --              |
| Other chronic respiratory diseases | Male   | 1-4 years | 95+ years | Data Rich  | 1         | 1     | Smoking Prevalence                                  | 19              |
| Other chronic respiratory diseases | Male   | 1-4 years | 95+ years | Data Rich  | 1         | 1     | Indoor Air Pollution (All Cooking Fuels)            | 230             |
| Other chronic respiratory diseases | Male   | 1-4 years | 95+ years | Data Rich  | 1         | 1     | Outdoor Air Pollution (PM2.5)                       | 253             |
| Other chronic respiratory diseases | Male   | 1-4 years | 95+ years | Data Rich  | 1         | 1     | Cumulative Cigarettes (5 Years)                     | 401             |
| Other chronic respiratory diseases | Male   | 1-4 years | 95+ years | Data Rich  | 1         | 1     | Log-transformed SEV scalar: Oth Resp                | --              |
| Other chronic respiratory diseases | Male   | 1-4 years | 95+ years | Data Rich  | -1        | 2     | Healthcare access and quality index                 | 0               |
| Other chronic respiratory diseases | Male   | 1-4 years | 95+ years | Data Rich  | 1         | 2     | Elevation Over 1500m (proportion)                   | 60              |
| Other chronic respiratory          | Male   | 1-4 years | 95+ years | Data Rich  | 1         | 2     | Elevation 500 to                                    | --              |

| Cause                              | Sex  | Age Start | Age End   | Model Type | Direction | Level | Covariate Name                                      | Number of Draws |
|------------------------------------|------|-----------|-----------|------------|-----------|-------|-----------------------------------------------------|-----------------|
| diseases                           |      |           |           |            |           |       | 1500m (proportion)                                  |                 |
| Other chronic respiratory diseases | Male | 1-4 years | 95+ years | Data Rich  | 1         | 2     | Population Density (over 1000 ppl/sqkm, proportion) | --              |
| Other chronic respiratory diseases | Male | 1-4 years | 95+ years | Data Rich  | -1        | 3     | Education (years per capita)                        | 0               |
| Other chronic respiratory diseases | Male | 1-4 years | 95+ years | Data Rich  | -1        | 3     | Socio-demographic Index                             | 0               |
| Other chronic respiratory diseases | Male | 1-4 years | 95+ years | Data Rich  | -1        | 3     | LDI (I\$ per capita)                                | --              |
| Other chronic respiratory diseases | Male | 1-4 years | 95+ years | Global     | 1         | 1     | Cumulative Cigarettes (5 Years)                     | 132             |
| Other chronic respiratory diseases | Male | 1-4 years | 95+ years | Global     | 1         | 1     | Smoking Prevalence                                  | 139             |
| Other chronic respiratory diseases | Male | 1-4 years | 95+ years | Global     | 1         | 1     | Indoor Air Pollution (All Cooking Fuels)            | 256             |
| Other chronic respiratory diseases | Male | 1-4 years | 95+ years | Global     | 1         | 1     | Log-transformed SEV scalar: Oth Resp                | --              |
| Other chronic respiratory diseases | Male | 1-4 years | 95+ years | Global     | 1         | 1     | Outdoor Air Pollution (PM2.5)                       | --              |
| Other chronic respiratory diseases | Male | 1-4 years | 95+ years | Global     | -1        | 2     | Healthcare access and quality index                 | 182             |
| Other chronic respiratory diseases | Male | 1-4 years | 95+ years | Global     | 1         | 2     | Elevation Over 1500m (proportion)                   | 390             |
| Other chronic respiratory diseases | Male | 1-4 years | 95+ years | Global     | 1         | 2     | Elevation 500 to 1500m (proportion)                 | 410             |
| Other chronic respiratory diseases | Male | 1-4 years | 95+ years | Global     | 1         | 2     | Population Density (over 1000 ppl/sqkm, proportion) | --              |
| Other chronic respiratory diseases | Male | 1-4 years | 95+ years | Global     | -1        | 3     | Socio-demographic Index                             | 69              |
| Other chronic respiratory diseases | Male | 1-4 years | 95+ years | Global     | -1        | 3     | Education (years per capita)                        | 168             |
| Other chronic respiratory diseases | Male | 1-4 years | 95+ years | Global     | -1        | 3     | LDI (I\$ per capita)                                | --              |

Table S6. Comparison of GBD 2017 and GBD 2019 covariates and level of covariates used in cause of death modeling

| Cause                        | Sex    | Covariate                                           | Level 1:<br>GBD<br>2019 | Level 2:<br>GBD<br>2019 | Level 3:<br>GBD<br>2019 | Level 1:<br>GBD<br>2017 | Level 2:<br>GBD<br>2017 | Level 3:<br>GBD<br>2017 |
|------------------------------|--------|-----------------------------------------------------|-------------------------|-------------------------|-------------------------|-------------------------|-------------------------|-------------------------|
| Chronic respiratory diseases | Male   | Outdoor Air Pollution (PM2.5)                       |                         | X                       |                         |                         | X                       |                         |
| Chronic respiratory diseases | Male   | Smoking Prevalence                                  |                         | X                       |                         |                         | X                       |                         |
| Chronic respiratory diseases | Female | Population Density (over 1000 ppl/sqkm, proportion) |                         |                         | X                       |                         |                         | X                       |
| Chronic respiratory diseases | Male   | Population Density (over 1000 ppl/sqkm, proportion) |                         |                         | X                       |                         |                         | X                       |
| Chronic respiratory diseases | Female | Cumulative Cigarettes (5 Years)                     | X                       |                         |                         | X                       |                         |                         |
| Chronic respiratory diseases | Male   | Cumulative Cigarettes (5 Years)                     | X                       |                         |                         | X                       |                         |                         |
| Chronic respiratory diseases | Female | Elevation 500 to 1500m (proportion)                 |                         |                         | X                       |                         |                         | X                       |
| Chronic respiratory diseases | Male   | Elevation 500 to 1500m (proportion)                 |                         |                         | X                       |                         |                         | X                       |
| Chronic respiratory diseases | Male   | Smoking Prevalence                                  | X                       |                         |                         | X                       |                         |                         |
| Chronic respiratory diseases | Male   | Smoking Prevalence                                  | X                       |                         |                         |                         | X                       |                         |
| Chronic respiratory diseases | Male   | Smoking Prevalence                                  |                         | X                       |                         | X                       |                         |                         |
| Chronic respiratory diseases | Female | Smoking Prevalence                                  |                         | X                       |                         |                         | X                       |                         |
| Chronic respiratory diseases | Male   | Elevation Over 1500m (proportion)                   |                         | X                       |                         |                         | X                       |                         |
| Chronic respiratory diseases | Female | Elevation Over 1500m (proportion)                   |                         | X                       |                         |                         | X                       |                         |
| Chronic respiratory diseases | Female | Outdoor Air Pollution (PM2.5)                       |                         | X                       |                         |                         | X                       |                         |
| Chronic respiratory diseases | Male   | Indoor Air Pollution (All Cooking Fuels)            | X                       |                         |                         | X                       |                         |                         |
| Chronic respiratory diseases | Male   | Indoor Air Pollution (All Cooking Fuels)            | X                       |                         |                         |                         | X                       |                         |
| Chronic respiratory diseases | Male   | Indoor Air Pollution (All Cooking Fuels)            |                         | X                       |                         | X                       |                         |                         |
| Chronic respiratory diseases | Male   | Indoor Air Pollution (All Cooking Fuels)            |                         | X                       |                         |                         | X                       |                         |
| Chronic respiratory diseases | Female | Indoor Air Pollution (All Cooking Fuels)            |                         | X                       |                         |                         | X                       |                         |
| Chronic respiratory diseases | Male   | Healthcare access and quality index                 |                         | X                       |                         |                         | X                       |                         |
| Chronic respiratory          | Female | Healthcare access and                               | X                       |                         |                         | X                       |                         |                         |

| Cause                                 | Sex    | Covariate                                | Level 1:<br>GBD<br>2019 | Level 2:<br>GBD<br>2019 | Level 3:<br>GBD<br>2019 | Level 1:<br>GBD<br>2017 | Level 2:<br>GBD<br>2017 | Level 3:<br>GBD<br>2017 |
|---------------------------------------|--------|------------------------------------------|-------------------------|-------------------------|-------------------------|-------------------------|-------------------------|-------------------------|
| diseases                              |        | quality index                            |                         |                         |                         |                         |                         |                         |
| Chronic respiratory diseases          | Male   | Socio-demographic Index                  |                         |                         | X                       |                         |                         | X                       |
| Chronic respiratory diseases          | Female | Socio-demographic Index                  |                         |                         | X                       |                         |                         | X                       |
| Chronic respiratory diseases          | Male   | LDI (I\$ per capita)                     |                         |                         | X                       |                         |                         | X                       |
| Chronic respiratory diseases          | Female | LDI (I\$ per capita)                     |                         |                         | X                       |                         |                         | X                       |
| Chronic respiratory diseases          | Male   | Education (years per capita)             |                         |                         | X                       |                         |                         | X                       |
| Chronic respiratory diseases          | Female | Education (years per capita)             |                         |                         | X                       |                         |                         | X                       |
| Chronic respiratory diseases          | Male   | Cumulative Cigarettes (10 Years)         | X                       |                         |                         | X                       |                         |                         |
| Chronic respiratory diseases          | Female | Cumulative Cigarettes (10 Years)         | X                       |                         |                         | X                       |                         |                         |
| Chronic obstructive pulmonary disease | Female | Cumulative Cigarettes (5 Years)          | X                       |                         |                         | X                       |                         |                         |
| Chronic obstructive pulmonary disease | Male   | Cumulative Cigarettes (20 Years)         | X                       |                         |                         | X                       |                         |                         |
| Chronic obstructive pulmonary disease | Female | Education (years per capita)             |                         |                         | X                       |                         |                         | X                       |
| Chronic obstructive pulmonary disease | Male   | Cumulative Cigarettes (5 Years)          | X                       |                         |                         | X                       |                         |                         |
| Chronic obstructive pulmonary disease | Female | Cumulative Cigarettes (10 Years)         | X                       |                         |                         | X                       |                         |                         |
| Chronic obstructive pulmonary disease | Male   | Education (years per capita)             |                         |                         | X                       |                         |                         | X                       |
| Chronic obstructive pulmonary disease | Female | Smoking Prevalence                       |                         | X                       |                         |                         | X                       |                         |
| Chronic obstructive pulmonary disease | Male   | Smoking Prevalence                       |                         | X                       |                         |                         | X                       |                         |
| Chronic obstructive pulmonary disease | Female | Elevation Over 1500m (proportion)        | X                       |                         |                         | X                       |                         |                         |
| Chronic obstructive pulmonary disease | Male   | Elevation Over 1500m (proportion)        | X                       |                         |                         | X                       |                         |                         |
| Chronic obstructive pulmonary disease | Female | Outdoor Air Pollution (PM2.5)            | X                       |                         |                         | X                       |                         |                         |
| Chronic obstructive pulmonary disease | Male   | Outdoor Air Pollution (PM2.5)            | X                       |                         |                         | X                       |                         |                         |
| Chronic obstructive pulmonary disease | Female | Indoor Air Pollution (All Cooking Fuels) |                         | X                       |                         |                         | X                       |                         |
| Chronic obstructive pulmonary disease | Male   | Cumulative Cigarettes (10 Years)         | X                       |                         |                         | X                       |                         |                         |
| Chronic obstructive pulmonary disease | Male   | Log-transformed SEV scalar: COPD         | X                       |                         |                         | X                       |                         |                         |
| Chronic obstructive                   | Male   | Indoor Air Pollution                     |                         | X                       |                         |                         | X                       |                         |

| Cause                                 | Sex    | Covariate                                              | Level 1:<br>GBD<br>2019 | Level 2:<br>GBD<br>2019 | Level 3:<br>GBD<br>2019 | Level 1:<br>GBD<br>2017 | Level 2:<br>GBD<br>2017 | Level 3:<br>GBD<br>2017 |
|---------------------------------------|--------|--------------------------------------------------------|-------------------------|-------------------------|-------------------------|-------------------------|-------------------------|-------------------------|
| pulmonary disease                     |        | (All Cooking Fuels)                                    |                         |                         |                         |                         |                         |                         |
| Chronic obstructive pulmonary disease | Female | Healthcare access and quality index                    | X                       |                         |                         | X                       |                         |                         |
| Chronic obstructive pulmonary disease | Male   | Healthcare access and quality index                    |                         | X                       |                         |                         | X                       |                         |
| Chronic obstructive pulmonary disease | Female | Socio-demographic Index                                |                         |                         | X                       |                         |                         | X                       |
| Chronic obstructive pulmonary disease | Male   | Socio-demographic Index                                |                         |                         | X                       |                         |                         | X                       |
| Chronic obstructive pulmonary disease | Female | LDI (I\$ per capita)                                   |                         |                         | X                       |                         |                         | X                       |
| Chronic obstructive pulmonary disease | Male   | LDI (I\$ per capita)                                   |                         |                         | X                       |                         |                         | X                       |
| Chronic obstructive pulmonary disease | Female | Log-transformed SEV scalar: COPD                       | X                       |                         |                         | X                       |                         |                         |
| Pneumoconiosis                        | Female | Cumulative Cigarettes (5 Years)                        |                         | X                       |                         |                         | X                       |                         |
| Pneumoconiosis                        | Male   | Cumulative Cigarettes (5 Years)                        |                         | X                       |                         |                         | X                       |                         |
| Pneumoconiosis                        | Female | Smoking Prevalence                                     |                         | X                       |                         |                         | X                       |                         |
| Pneumoconiosis                        | Female | Indoor Air Pollution (All Cooking Fuels)               |                         | X                       |                         |                         | X                       |                         |
| Pneumoconiosis                        | Male   | Indoor Air Pollution (All Cooking Fuels)               |                         | X                       |                         |                         | X                       |                         |
| Pneumoconiosis                        | Female | Healthcare access and quality index                    |                         | X                       |                         |                         | X                       |                         |
| Pneumoconiosis                        | Female | LDI (I\$ per capita)                                   |                         |                         | X                       |                         |                         | X                       |
| Pneumoconiosis                        | Female | Socio-demographic Index                                |                         |                         | X                       |                         |                         | X                       |
| Pneumoconiosis                        | Male   | Socio-demographic Index                                |                         |                         | X                       |                         |                         | X                       |
| Pneumoconiosis                        | Male   | LDI (I\$ per capita)                                   |                         |                         | X                       |                         |                         | X                       |
| Pneumoconiosis                        | Female | Education (years per capita)                           |                         |                         | X                       |                         |                         | X                       |
| Pneumoconiosis                        | Male   | Education (years per capita)                           |                         |                         | X                       |                         |                         | X                       |
| Pneumoconiosis                        | Male   | Education (years per capita)                           |                         |                         | X                       |                         |                         | X                       |
| Pneumoconiosis                        | Male   | Asbestos consumption (metric tons per year per capita) | X                       |                         |                         | X                       |                         |                         |
| Pneumoconiosis                        | Male   | Healthcare access and quality index                    |                         | X                       |                         |                         | X                       |                         |
| Pneumoconiosis                        | Female | Asbestos consumption (metric tons per year per capita) | X                       |                         |                         | X                       |                         |                         |

| Cause          | Sex    | Covariate                                              | Level 1:<br>GBD<br>2019 | Level 2:<br>GBD<br>2019 | Level 3:<br>GBD<br>2019 | Level 1:<br>GBD<br>2017 | Level 2:<br>GBD<br>2017 | Level 3:<br>GBD<br>2017 |
|----------------|--------|--------------------------------------------------------|-------------------------|-------------------------|-------------------------|-------------------------|-------------------------|-------------------------|
| Pneumoconiosis | Male   | Smoking Prevalence                                     |                         | X                       |                         |                         | X                       |                         |
| Silicosis      | Female | Smoking Prevalence                                     |                         | X                       |                         |                         | X                       |                         |
| Silicosis      | Female | Education (years per capita)                           |                         |                         | X                       |                         |                         | X                       |
| Silicosis      | Male   | LDI (\$ per capita)                                    |                         |                         | X                       |                         |                         | X                       |
| Silicosis      | Female | LDI (\$ per capita)                                    |                         |                         | X                       |                         |                         | X                       |
| Silicosis      | Female | Socio-demographic Index                                |                         |                         | X                       |                         |                         | X                       |
| Silicosis      | Male   | Healthcare access and quality index                    |                         | X                       |                         |                         | X                       |                         |
| Silicosis      | Male   | Socio-demographic Index                                |                         |                         | X                       |                         |                         | X                       |
| Silicosis      | Male   | Indoor Air Pollution (All Cooking Fuels)               |                         | X                       |                         |                         | X                       |                         |
| Silicosis      | Female | Indoor Air Pollution (All Cooking Fuels)               |                         | X                       |                         |                         | X                       |                         |
| Silicosis      | Male   | Smoking Prevalence                                     |                         | X                       |                         |                         | X                       |                         |
| Silicosis      | Male   | Education (years per capita)                           |                         |                         | X                       |                         |                         | X                       |
| Silicosis      | Female | Cumulative Cigarettes (5 Years)                        |                         | X                       |                         |                         | X                       |                         |
| Silicosis      | Female | Healthcare access and quality index                    |                         | X                       |                         |                         | X                       |                         |
| Silicosis      | Male   | Cumulative Cigarettes (5 Years)                        |                         | X                       |                         |                         | X                       |                         |
| Asbestosis     | Female | Socio-demographic Index                                |                         |                         | X                       |                         |                         | X                       |
| Asbestosis     | Male   | Education (years per capita)                           |                         |                         | X                       |                         |                         | X                       |
| Asbestosis     | Female | Education (years per capita)                           |                         |                         | X                       |                         |                         | X                       |
| Asbestosis     | Male   | LDI (\$ per capita)                                    |                         |                         | X                       |                         |                         | X                       |
| Asbestosis     | Female | LDI (\$ per capita)                                    |                         |                         | X                       |                         |                         | X                       |
| Asbestosis     | Male   | Socio-demographic Index                                |                         |                         | X                       |                         |                         | X                       |
| Asbestosis     | Female | Healthcare access and quality index                    |                         | X                       |                         |                         | X                       |                         |
| Asbestosis     | Male   | Indoor Air Pollution (All Cooking Fuels)               |                         | X                       |                         |                         | X                       |                         |
| Asbestosis     | Female | Asbestos consumption (metric tons per year per capita) | X                       |                         |                         | X                       |                         |                         |
| Asbestosis     | Male   | Asbestos consumption (metric tons per year per capita) | X                       |                         |                         | X                       |                         |                         |
| Asbestosis     | Female | Elevation 500 to                                       |                         | X                       |                         |                         | X                       |                         |

| Cause                       | Sex    | Covariate                                | Level 1:<br>GBD<br>2019 | Level 2:<br>GBD<br>2019 | Level 3:<br>GBD<br>2019 | Level 1:<br>GBD<br>2017 | Level 2:<br>GBD<br>2017 | Level 3:<br>GBD<br>2017 |
|-----------------------------|--------|------------------------------------------|-------------------------|-------------------------|-------------------------|-------------------------|-------------------------|-------------------------|
|                             |        | 1500m (proportion)                       |                         |                         |                         |                         |                         |                         |
| Asbestosis                  | Male   | Elevation 500 to 1500m (proportion)      |                         | X                       |                         |                         | X                       |                         |
| Asbestosis                  | Female | Cumulative Cigarettes (5 Years)          |                         | X                       |                         |                         | X                       |                         |
| Asbestosis                  | Male   | Cumulative Cigarettes (5 Years)          |                         | X                       |                         |                         | X                       |                         |
| Asbestosis                  | Male   | Healthcare access and quality index      |                         | X                       |                         |                         | X                       |                         |
| Asbestosis                  | Female | Cumulative Cigarettes (10 Years)         |                         | X                       |                         |                         | X                       |                         |
| Asbestosis                  | Male   | Smoking Prevalence                       | X                       |                         |                         |                         | X                       |                         |
| Asbestosis                  | Male   | Smoking Prevalence                       | X                       |                         |                         | X                       |                         |                         |
| Asbestosis                  | Male   | Smoking Prevalence                       |                         | X                       |                         |                         | X                       |                         |
| Asbestosis                  | Male   | Smoking Prevalence                       |                         | X                       |                         | X                       |                         |                         |
| Asbestosis                  | Female | Elevation Over 1500m (proportion)        |                         | X                       |                         |                         | X                       |                         |
| Asbestosis                  | Male   | Elevation Over 1500m (proportion)        |                         | X                       |                         |                         | X                       |                         |
| Asbestosis                  | Female | Indoor Air Pollution (All Cooking Fuels) |                         | X                       |                         |                         | X                       |                         |
| Asbestosis                  | Female | Smoking Prevalence                       |                         | X                       |                         |                         | X                       |                         |
| Coal workers pneumoconiosis | Female | LDI (I\$ per capita)                     |                         |                         | X                       |                         |                         | X                       |
| Coal workers pneumoconiosis | Male   | LDI (I\$ per capita)                     |                         |                         | X                       |                         |                         | X                       |
| Coal workers pneumoconiosis | Female | Socio-demographic Index                  |                         |                         | X                       |                         |                         | X                       |
| Coal workers pneumoconiosis | Male   | Cumulative Cigarettes (5 Years)          |                         | X                       |                         |                         | X                       |                         |
| Coal workers pneumoconiosis | Female | Education (years per capita)             |                         |                         | X                       |                         |                         | X                       |
| Coal workers pneumoconiosis | Male   | Education (years per capita)             |                         |                         | X                       |                         |                         | X                       |
| Coal workers pneumoconiosis | Female | Cumulative Cigarettes (5 Years)          |                         | X                       |                         |                         | X                       |                         |
| Coal workers pneumoconiosis | Male   | Healthcare access and quality index      |                         | X                       |                         |                         | X                       |                         |
| Coal workers pneumoconiosis | Male   | Socio-demographic Index                  |                         |                         | X                       |                         |                         | X                       |
| Coal workers pneumoconiosis | Male   | Indoor Air Pollution (All Cooking Fuels) |                         | X                       |                         |                         | X                       |                         |
| Coal workers pneumoconiosis | Female | Indoor Air Pollution (All Cooking Fuels) |                         | X                       |                         |                         | X                       |                         |
| Coal workers pneumoconiosis | Male   | Smoking Prevalence                       |                         | X                       |                         |                         | X                       |                         |
| Coal workers pneumoconiosis | Female | Smoking Prevalence                       |                         | X                       |                         |                         | X                       |                         |

| Cause                       | Sex    | Covariate                                | Level 1:<br>GBD<br>2019 | Level 2:<br>GBD<br>2019 | Level 3:<br>GBD<br>2019 | Level 1:<br>GBD<br>2017 | Level 2:<br>GBD<br>2017 | Level 3:<br>GBD<br>2017 |
|-----------------------------|--------|------------------------------------------|-------------------------|-------------------------|-------------------------|-------------------------|-------------------------|-------------------------|
| Coal workers pneumoconiosis | Female | Healthcare access and quality index      |                         | X                       |                         |                         | X                       |                         |
| Other pneumoconiosis        | Male   | Indoor Air Pollution (All Cooking Fuels) |                         | X                       |                         |                         | X                       |                         |
| Other pneumoconiosis        | Female | Cumulative Cigarettes (5 Years)          |                         | X                       |                         |                         | X                       |                         |
| Other pneumoconiosis        | Male   | Cumulative Cigarettes (5 Years)          |                         | X                       |                         |                         | X                       |                         |
| Other pneumoconiosis        | Male   | Smoking Prevalence                       |                         | X                       |                         |                         | X                       |                         |
| Other pneumoconiosis        | Female | Indoor Air Pollution (All Cooking Fuels) |                         | X                       |                         |                         | X                       |                         |
| Other pneumoconiosis        | Female | Healthcare access and quality index      |                         | X                       |                         |                         | X                       |                         |
| Other pneumoconiosis        | Female | Smoking Prevalence                       |                         | X                       |                         |                         | X                       |                         |
| Other pneumoconiosis        | Male   | Education (years per capita)             |                         |                         | X                       |                         |                         | X                       |
| Other pneumoconiosis        | Female | Education (years per capita)             |                         |                         | X                       |                         |                         | X                       |
| Other pneumoconiosis        | Male   | LDI (I\$ per capita)                     |                         |                         | X                       |                         |                         | X                       |
| Other pneumoconiosis        | Female | LDI (I\$ per capita)                     |                         |                         | X                       |                         |                         | X                       |
| Other pneumoconiosis        | Male   | Socio-demographic Index                  |                         |                         | X                       |                         |                         | X                       |
| Other pneumoconiosis        | Female | Socio-demographic Index                  |                         |                         | X                       |                         |                         | X                       |
| Other pneumoconiosis        | Male   | Healthcare access and quality index      |                         | X                       |                         |                         | X                       |                         |
| Asthma                      | Female | Cumulative Cigarettes (5 Years)          | X                       |                         |                         | X                       |                         |                         |
| Asthma                      | Male   | Education (years per capita)             |                         |                         | X                       |                         |                         | X                       |
| Asthma                      | Male   | Cumulative Cigarettes (5 Years)          | X                       |                         |                         | X                       |                         |                         |
| Asthma                      | Female | Education (years per capita)             |                         |                         | X                       |                         |                         | X                       |
| Asthma                      | Male   | LDI (I\$ per capita)                     |                         |                         | X                       |                         |                         | X                       |
| Asthma                      | Female | LDI (I\$ per capita)                     |                         |                         | X                       |                         |                         | X                       |
| Asthma                      | Male   | Socio-demographic Index                  |                         |                         | X                       |                         |                         | X                       |
| Asthma                      | Male   | Log-transformed SEV scalar: Asthma       | X                       |                         |                         | X                       |                         |                         |
| Asthma                      | Female | Socio-demographic Index                  |                         |                         | X                       |                         |                         | X                       |
| Asthma                      | Male   | Healthcare access and quality index      | X                       |                         |                         | X                       |                         |                         |
| Asthma                      | Female | Healthcare access and quality index      | X                       |                         |                         | X                       |                         |                         |
| Asthma                      | Male   | Indoor Air Pollution (All Cooking Fuels) |                         | X                       |                         |                         | X                       |                         |

| Cause                                                     | Sex    | Covariate                                   | Level 1:<br>GBD<br>2019 | Level 2:<br>GBD<br>2019 | Level 3:<br>GBD<br>2019 | Level 1:<br>GBD<br>2017 | Level 2:<br>GBD<br>2017 | Level 3:<br>GBD<br>2017 |
|-----------------------------------------------------------|--------|---------------------------------------------|-------------------------|-------------------------|-------------------------|-------------------------|-------------------------|-------------------------|
| Asthma                                                    | Female | Indoor Air Pollution<br>(All Cooking Fuels) |                         | X                       |                         |                         | X                       |                         |
| Asthma                                                    | Male   | Outdoor Air Pollution<br>(PM2.5)            |                         | X                       |                         |                         | X                       |                         |
| Asthma                                                    | Female | Outdoor Air Pollution<br>(PM2.5)            |                         | X                       |                         |                         | X                       |                         |
| Asthma                                                    | Male   | Smoking Prevalence                          |                         | X                       |                         |                         | X                       |                         |
| Asthma                                                    | Female | Smoking Prevalence                          |                         | X                       |                         |                         | X                       |                         |
| Asthma                                                    | Male   | Cumulative Cigarettes<br>(10 Years)         | X                       |                         |                         | X                       |                         |                         |
| Asthma                                                    | Female | Cumulative Cigarettes<br>(10 Years)         | X                       |                         |                         | X                       |                         |                         |
| Asthma                                                    | Female | Log-transformed SEV<br>scalar: Asthma       | X                       |                         |                         | X                       |                         |                         |
| Interstitial lung disease<br>and pulmonary<br>sarcoidosis | Male   | Cumulative Cigarettes<br>(10 Years)         | X                       |                         |                         | X                       |                         |                         |
| Interstitial lung disease<br>and pulmonary<br>sarcoidosis | Female | Cumulative Cigarettes<br>(10 Years)         | X                       |                         |                         | X                       |                         |                         |
| Interstitial lung disease<br>and pulmonary<br>sarcoidosis | Female | Indoor Air Pollution<br>(All Cooking Fuels) |                         | X                       |                         |                         | X                       |                         |
| Interstitial lung disease<br>and pulmonary<br>sarcoidosis | Female | Cumulative Cigarettes<br>(5 Years)          | X                       |                         |                         | X                       |                         |                         |
| Interstitial lung disease<br>and pulmonary<br>sarcoidosis | Male   | Indoor Air Pollution<br>(All Cooking Fuels) |                         | X                       |                         |                         | X                       |                         |
| Interstitial lung disease<br>and pulmonary<br>sarcoidosis | Female | Healthcare access and<br>quality index      |                         | X                       |                         |                         | X                       |                         |
| Interstitial lung disease<br>and pulmonary<br>sarcoidosis | Male   | Healthcare access and<br>quality index      |                         | X                       |                         |                         | X                       |                         |
| Interstitial lung disease<br>and pulmonary<br>sarcoidosis | Female | Socio-demographic<br>Index                  |                         |                         | X                       |                         |                         | X                       |
| Interstitial lung disease<br>and pulmonary<br>sarcoidosis | Male   | Socio-demographic<br>Index                  |                         |                         | X                       |                         |                         | X                       |
| Interstitial lung disease<br>and pulmonary<br>sarcoidosis | Female | LDI (I\$ per capita)                        |                         |                         | X                       |                         |                         | X                       |
| Interstitial lung disease<br>and pulmonary<br>sarcoidosis | Female | Indoor Air Pollution<br>(All Cooking Fuels) |                         | X                       |                         | X                       |                         |                         |
| Interstitial lung disease<br>and pulmonary                | Male   | LDI (I\$ per capita)                        |                         |                         | X                       |                         |                         | X                       |

| Cause                                               | Sex    | Covariate                                | Level 1:<br>GBD<br>2019 | Level 2:<br>GBD<br>2019 | Level 3:<br>GBD<br>2019 | Level 1:<br>GBD<br>2017 | Level 2:<br>GBD<br>2017 | Level 3:<br>GBD<br>2017 |
|-----------------------------------------------------|--------|------------------------------------------|-------------------------|-------------------------|-------------------------|-------------------------|-------------------------|-------------------------|
| sarcoidosis                                         |        |                                          |                         |                         |                         |                         |                         |                         |
| Interstitial lung disease and pulmonary sarcoidosis | Female | Education (years per capita)             |                         |                         | X                       |                         |                         | X                       |
| Interstitial lung disease and pulmonary sarcoidosis | Female | Education (years per capita)             |                         |                         | X                       |                         |                         | X                       |
| Interstitial lung disease and pulmonary sarcoidosis | Male   | Education (years per capita)             |                         |                         | X                       |                         |                         | X                       |
| Interstitial lung disease and pulmonary sarcoidosis | Female | Indoor Air Pollution (All Cooking Fuels) | X                       |                         |                         | X                       |                         |                         |
| Interstitial lung disease and pulmonary sarcoidosis | Female | Indoor Air Pollution (All Cooking Fuels) | X                       |                         |                         |                         | X                       |                         |
| Interstitial lung disease and pulmonary sarcoidosis | Male   | Outdoor Air Pollution (PM2.5)            |                         | X                       |                         |                         | X                       |                         |
| Interstitial lung disease and pulmonary sarcoidosis | Female | Outdoor Air Pollution (PM2.5)            |                         | X                       |                         | X                       |                         |                         |
| Interstitial lung disease and pulmonary sarcoidosis | Female | Outdoor Air Pollution (PM2.5)            |                         | X                       |                         |                         | X                       |                         |
| Interstitial lung disease and pulmonary sarcoidosis | Female | Outdoor Air Pollution (PM2.5)            | X                       |                         |                         | X                       |                         |                         |
| Interstitial lung disease and pulmonary sarcoidosis | Male   | Smoking Prevalence                       | X                       |                         |                         | X                       |                         |                         |
| Interstitial lung disease and pulmonary sarcoidosis | Female | Smoking Prevalence                       | X                       |                         |                         | X                       |                         |                         |
| Interstitial lung disease and pulmonary sarcoidosis | Male   | Cumulative Cigarettes (5 Years)          | X                       |                         |                         | X                       |                         |                         |
| Interstitial lung disease and pulmonary sarcoidosis | Female | Outdoor Air Pollution (PM2.5)            | X                       |                         |                         |                         | X                       |                         |
| Other chronic respiratory diseases                  | Male   | Outdoor Air Pollution (PM2.5)            | X                       |                         |                         | X                       |                         |                         |
| Other chronic respiratory diseases                  | Female | Outdoor Air Pollution (PM2.5)            | X                       |                         |                         | X                       |                         |                         |
| Other chronic respiratory diseases                  | Female | Elevation Over 1500m (proportion)        |                         | X                       |                         |                         | X                       |                         |
| Other chronic respiratory diseases                  | Male   | Elevation Over 1500m (proportion)        |                         | X                       |                         |                         | X                       |                         |
| Other chronic                                       | Male   | Indoor Air Pollution                     | X                       |                         |                         | X                       |                         |                         |

| Cause                              | Sex    | Covariate                                           | Level 1:<br>GBD<br>2019 | Level 2:<br>GBD<br>2019 | Level 3:<br>GBD<br>2019 | Level 1:<br>GBD<br>2017 | Level 2:<br>GBD<br>2017 | Level 3:<br>GBD<br>2017 |
|------------------------------------|--------|-----------------------------------------------------|-------------------------|-------------------------|-------------------------|-------------------------|-------------------------|-------------------------|
| respiratory diseases               |        | (All Cooking Fuels)                                 |                         |                         |                         |                         |                         |                         |
| Other chronic respiratory diseases | Female | Indoor Air Pollution (All Cooking Fuels)            | X                       |                         |                         | X                       |                         |                         |
| Other chronic respiratory diseases | Male   | Healthcare access and quality index                 |                         | X                       |                         |                         | X                       |                         |
| Other chronic respiratory diseases | Female | Healthcare access and quality index                 |                         | X                       |                         |                         | X                       |                         |
| Other chronic respiratory diseases | Male   | Socio-demographic Index                             |                         |                         | X                       |                         |                         | X                       |
| Other chronic respiratory diseases | Female | Socio-demographic Index                             |                         |                         | X                       |                         |                         | X                       |
| Other chronic respiratory diseases | Male   | LDI (I\$ per capita)                                |                         |                         | X                       |                         |                         | X                       |
| Other chronic respiratory diseases | Female | Population Density (over 1000 ppl/sqkm, proportion) |                         | X                       |                         |                         | X                       |                         |
| Other chronic respiratory diseases | Male   | Population Density (over 1000 ppl/sqkm, proportion) |                         | X                       |                         |                         | X                       |                         |
| Other chronic respiratory diseases | Female | Cumulative Cigarettes (5 Years)                     | X                       |                         |                         | X                       |                         |                         |
| Other chronic respiratory diseases | Male   | Cumulative Cigarettes (5 Years)                     | X                       |                         |                         | X                       |                         |                         |
| Other chronic respiratory diseases | Female | Elevation 500 to 1500m (proportion)                 |                         | X                       |                         |                         | X                       |                         |
| Other chronic respiratory diseases | Male   | Elevation 500 to 1500m (proportion)                 |                         | X                       |                         |                         | X                       |                         |
| Other chronic respiratory diseases | Female | LDI (I\$ per capita)                                |                         |                         | X                       |                         |                         | X                       |
| Other chronic respiratory diseases | Male   | Education (years per capita)                        |                         |                         | X                       |                         |                         | X                       |
| Other chronic respiratory diseases | Female | Education (years per capita)                        |                         |                         | X                       |                         |                         | X                       |
| Other chronic respiratory diseases | Female | Education (years per capita)                        |                         |                         | X                       |                         |                         | X                       |
| Other chronic respiratory diseases | Female | Smoking Prevalence                                  | X                       |                         |                         | X                       |                         |                         |
| Other chronic respiratory diseases | Male   | Smoking Prevalence                                  | X                       |                         |                         | X                       |                         |                         |

Table S7. SDI quintiles for countries estimated in GBD 2019

| SDI Quintile           | Locations included based on SDI values in 2019 from GBD 2019 results                                                                                                                                                                                                                                                                                                                                                                                                                                                                    |
|------------------------|-----------------------------------------------------------------------------------------------------------------------------------------------------------------------------------------------------------------------------------------------------------------------------------------------------------------------------------------------------------------------------------------------------------------------------------------------------------------------------------------------------------------------------------------|
| <b>High SDI</b>        | Andorra, Australia, Austria, Belgium, Bermuda, Brunei, Canada, Cyprus, Czechia, Denmark, Estonia, Finland, France, Germany, Guam, Iceland, Ireland, Japan, Kuwait, Latvia, Lithuania, Luxembourg, Monaco, Netherlands, New Zealand, Norway, Puerto Rico, Qatar, San Marino, Saudi Arabia, Singapore, Slovakia, Slovenia, South Korea, Sweden, Switzerland, Taiwan (Province of China), United Arab Emirates, United Kingdom, United States of America                                                                                   |
| <b>High-middle SDI</b> | American Samoa, Antigua and Barbuda, Argentina, The Bahamas, Bahrain, Barbados, Belarus, Bosnia and Herzegovina, Bulgaria, Chile, Cook Islands, Croatia, Dominica, Georgia, Greece, Greenland, Hungary, Israel, Italy, Jordan, Kazakhstan, Lebanon, Libya, Malaysia, Malta, Mauritius, Moldova, Montenegro, Niue, North Macedonia, Northern Mariana Islands, Oman, Palau, Poland, Portugal, Romania, Russia, Saint Kitts and Nevis, Serbia, Seychelles, Spain, Sri Lanka, Trinidad and Tobago, Turkey, Ukraine, Virgin Islands, Uruguay |
| <b>Middle SDI</b>      | Albania, Algeria, Armenia, Azerbaijan, Botswana, Brazil, China, Colombia, Costa Rica, Cuba, Ecuador, Egypt, Equatorial Guinea, Fiji, Gabon, Grenada, Guyana, Indonesia, Iran, Iraq, Jamaica, Mexico, Namibia, Nauru, Panama, Paraguay, Peru, Philippines, Saint Lucia, Saint Vincent and the Grenadines, Samoa, South Africa, Suriname, Syria, Thailand, Tokelau, Tonga, Tunisia, Turkmenistan, Uzbekistan, Vietnam                                                                                                                     |
| <b>Low-middle SDI</b>  | Angola, Bangladesh, Belize, Bhutan, Bolivia, Cambodia, Cameroon, Cape Verde, Congo (Brazzaville), Djibouti, Dominican Republic, El Salvador, Eswatini, Federated States of Micronesia, Ghana, Guatemala, Honduras, India, Kenya, Kiribati, Kyrgyzstan, Laos, Lesotho, Maldives, Marshall Islands, Mauritania, Mongolia, Morocco, Myanmar, Nicaragua, Nigeria, North Korea, Palestine, São Tomé and Príncipe, Sudan, Tajikistan, Timor-Leste, Tuvalu, Vanuatu, Venezuela, Zambia, Zimbabwe                                               |
| <b>Low SDI</b>         | Afghanistan, Benin, Burkina Faso, Burundi, Central African Republic, Chad, Comoros, Côte d'Ivoire, DR Congo, Eritrea, Ethiopia, The Gambia, Guinea, Guinea-Bissau, Haiti, Liberia, Madagascar, Malawi, Mali, Mozambique, Nepal, Niger, Pakistan, Papua New Guinea, Rwanda, Senegal, Sierra Leone, Solomon Islands, Somalia, South Sudan, Tanzania, Togo, Uganda, Yemen                                                                                                                                                                  |

SDI = Socio-demographic Index; GBD = Global Burden of Disease study.

**Figure S1. Classification of GBD regions and super regions**

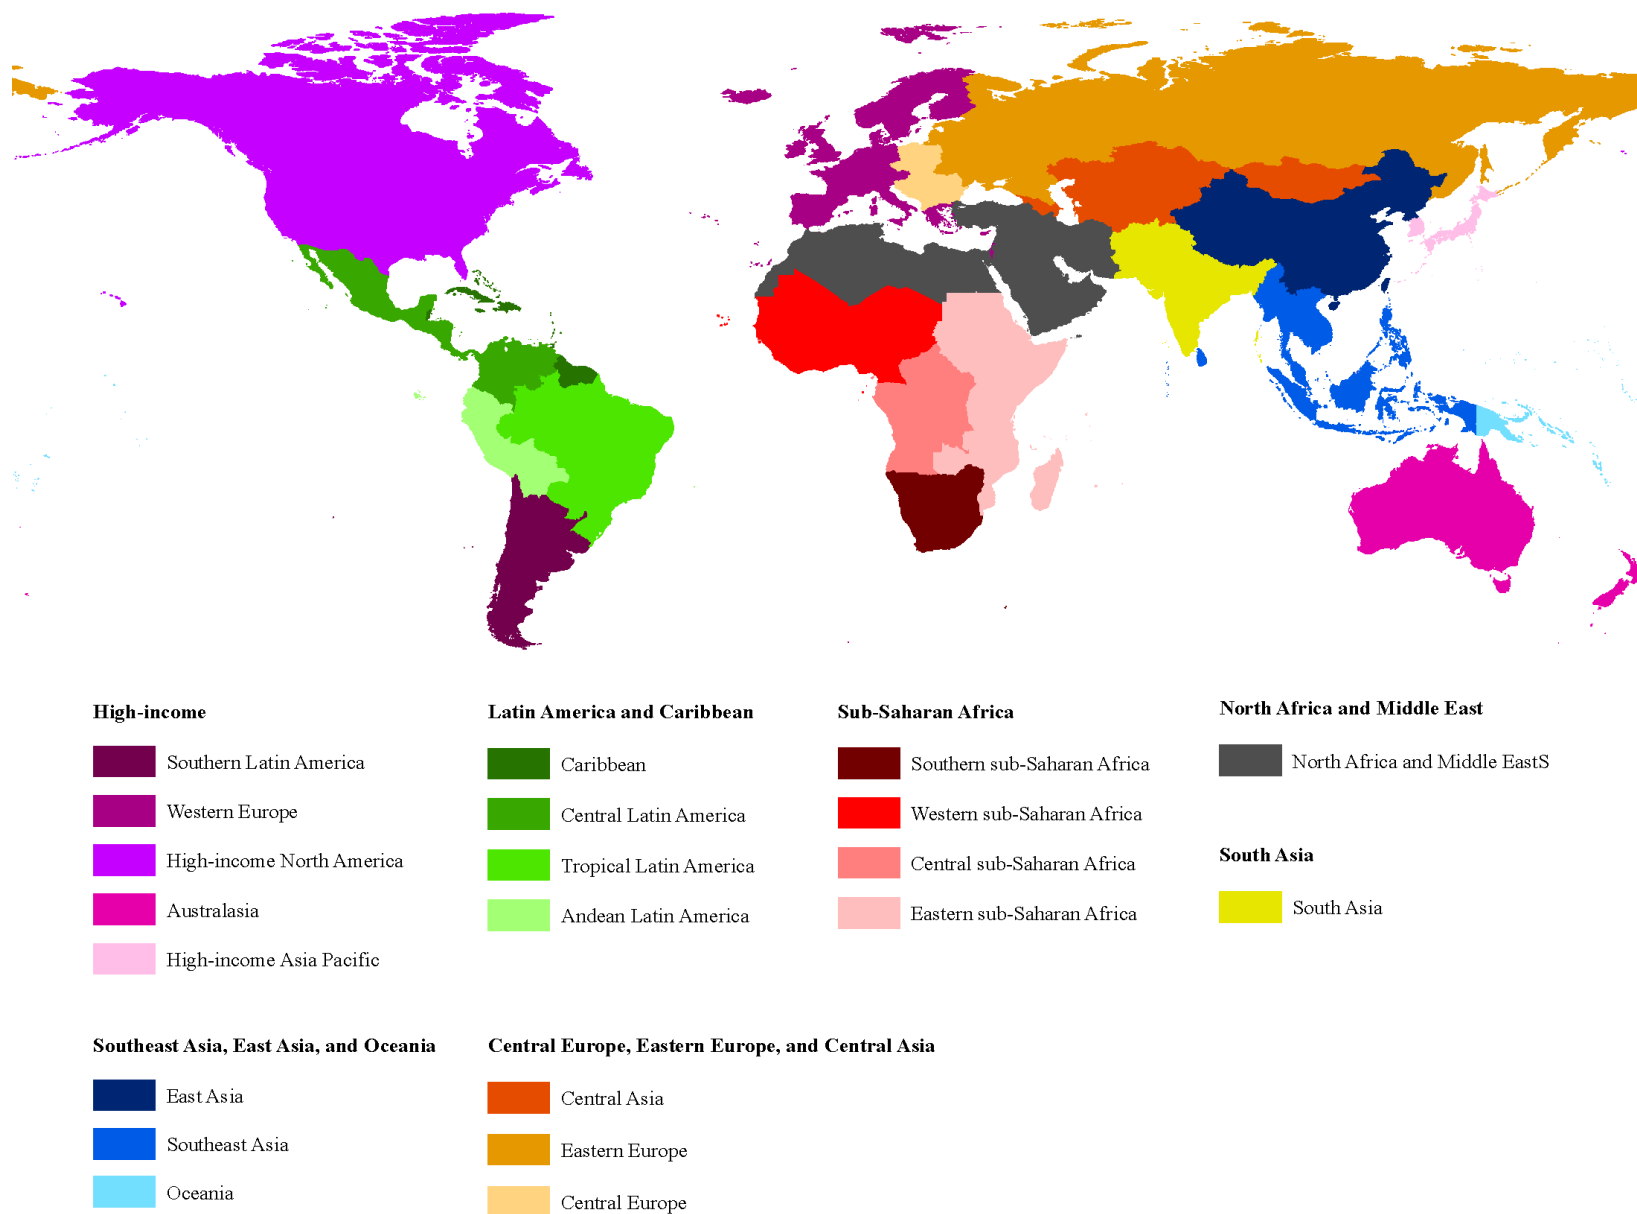

## **Appendix 2: Online Figures and Tables**

### **Results appendix to “Global Burden of Chronic Respiratory Diseases and Risk Factors, 1990–2019: Update From the GBD 2019 Study”**

This appendix provides more detailed results for “Global Burden of Chronic Respiratory Diseases and Risk Factors, 1990–2019: Update From the GBD 2019 Study”.

### B.3 Chronic respiratory diseases

Figure S1. Age-standardised rate of deaths and DALYs from chronic respiratory diseases in 2019 and their percent change from 1990 in men

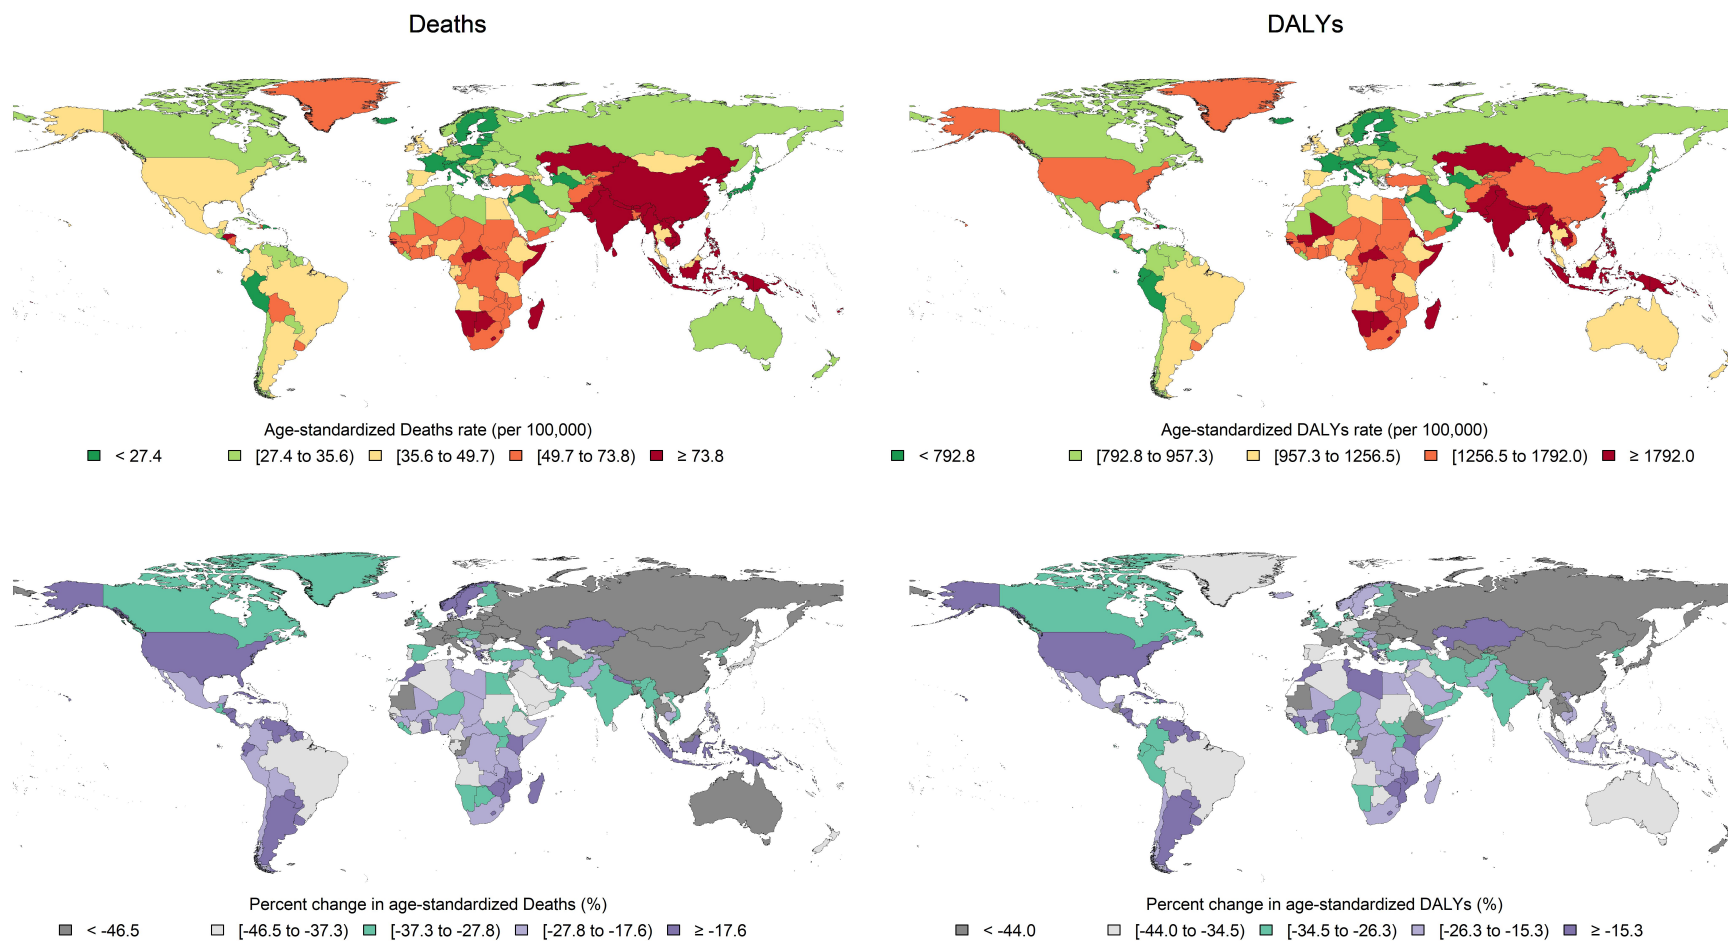

Figure S2. Age-standardised rate of deaths and DALYs from chronic respiratory diseases in 2019 and their percent change from 1990 to 2019 in women

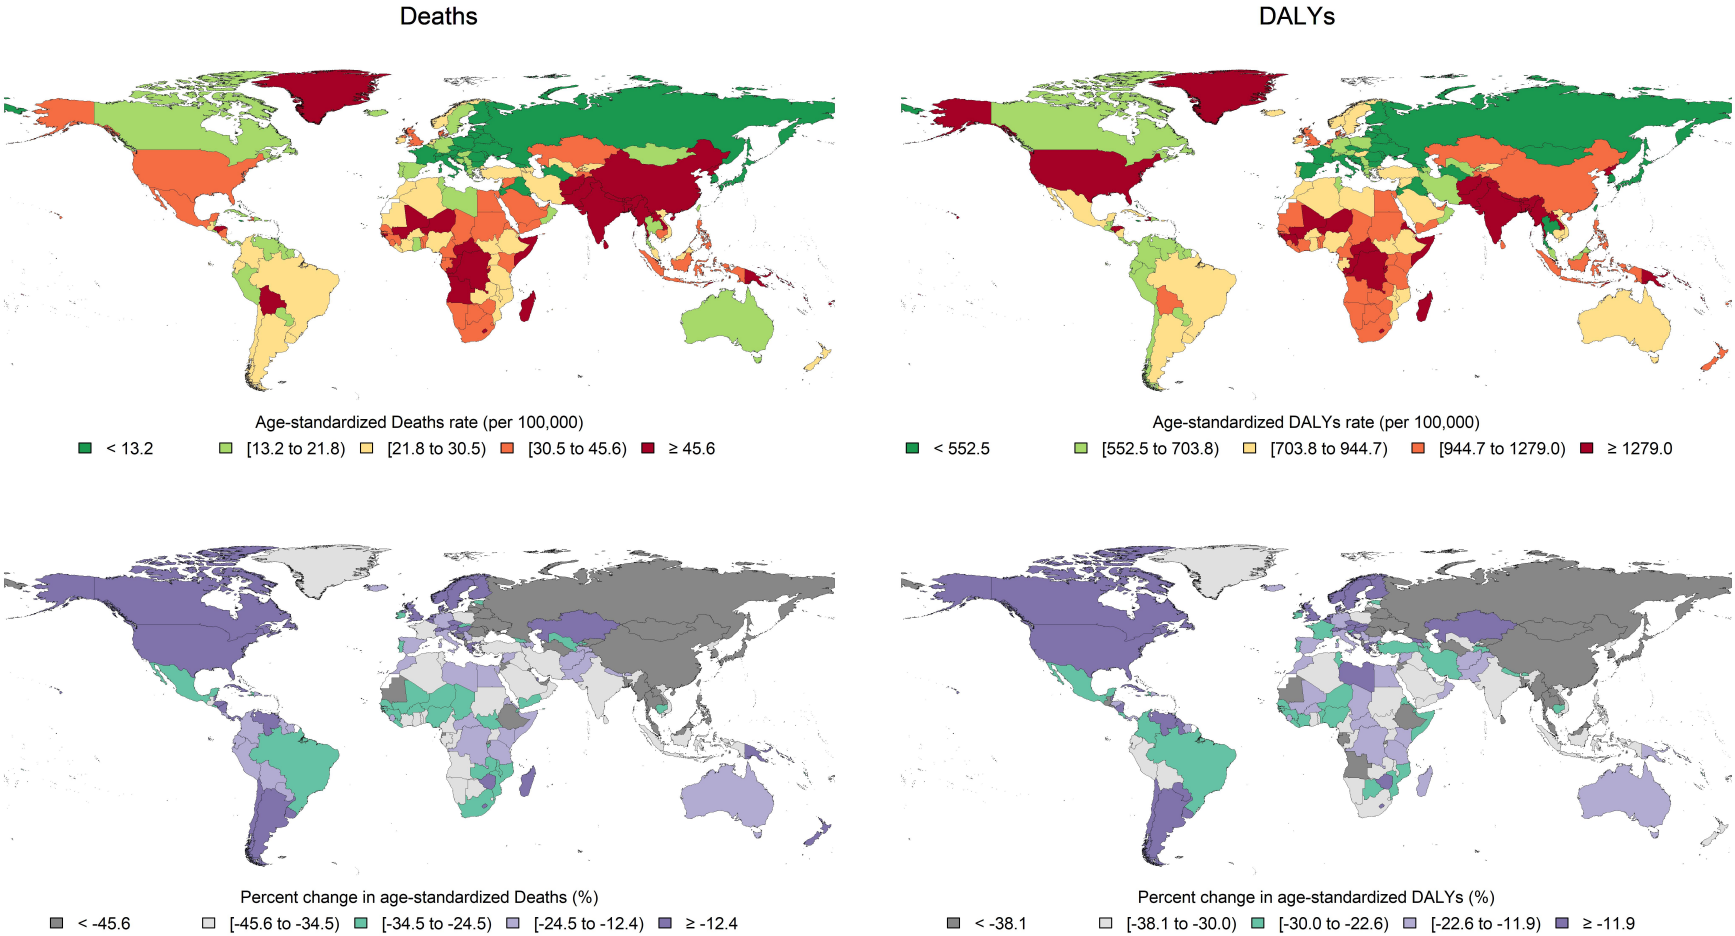

Figure S3. Age-standardised rate of prevalence and incidence of chronic respiratory diseases in 2019 and their percent change from 1990 to 2019 in both sexes

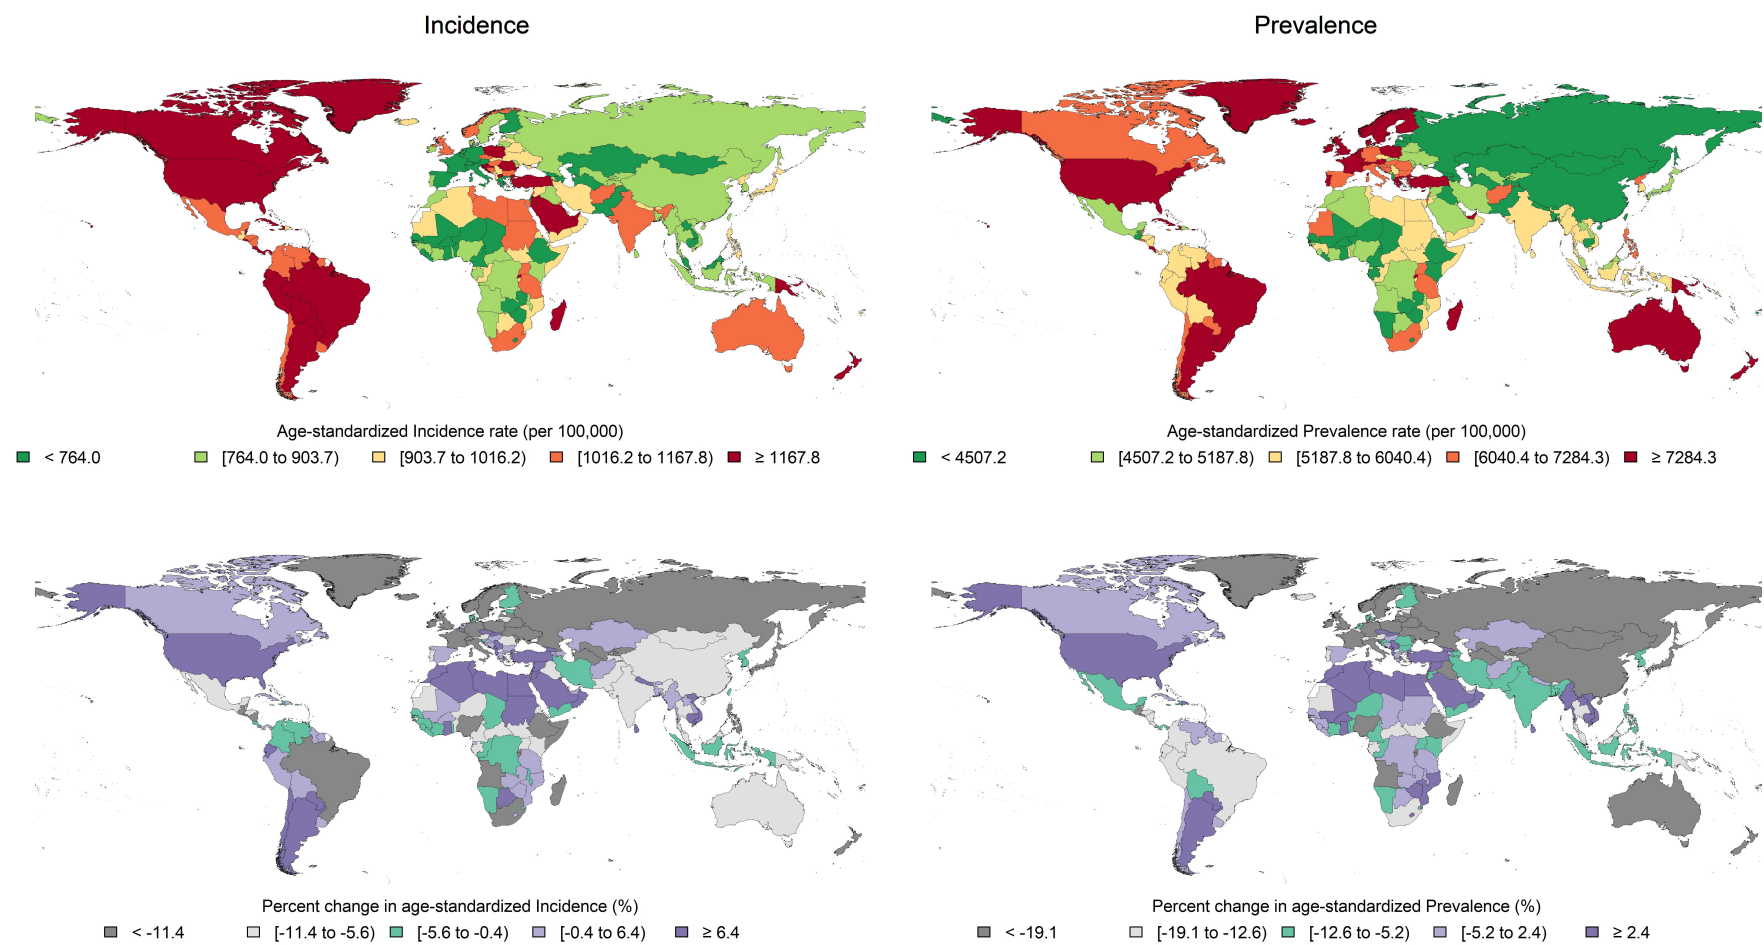

Figure S4. Age-standardised rate of prevalence and incidence of chronic respiratory diseases in 2019 and their percent change from 1990 to 2019 in men

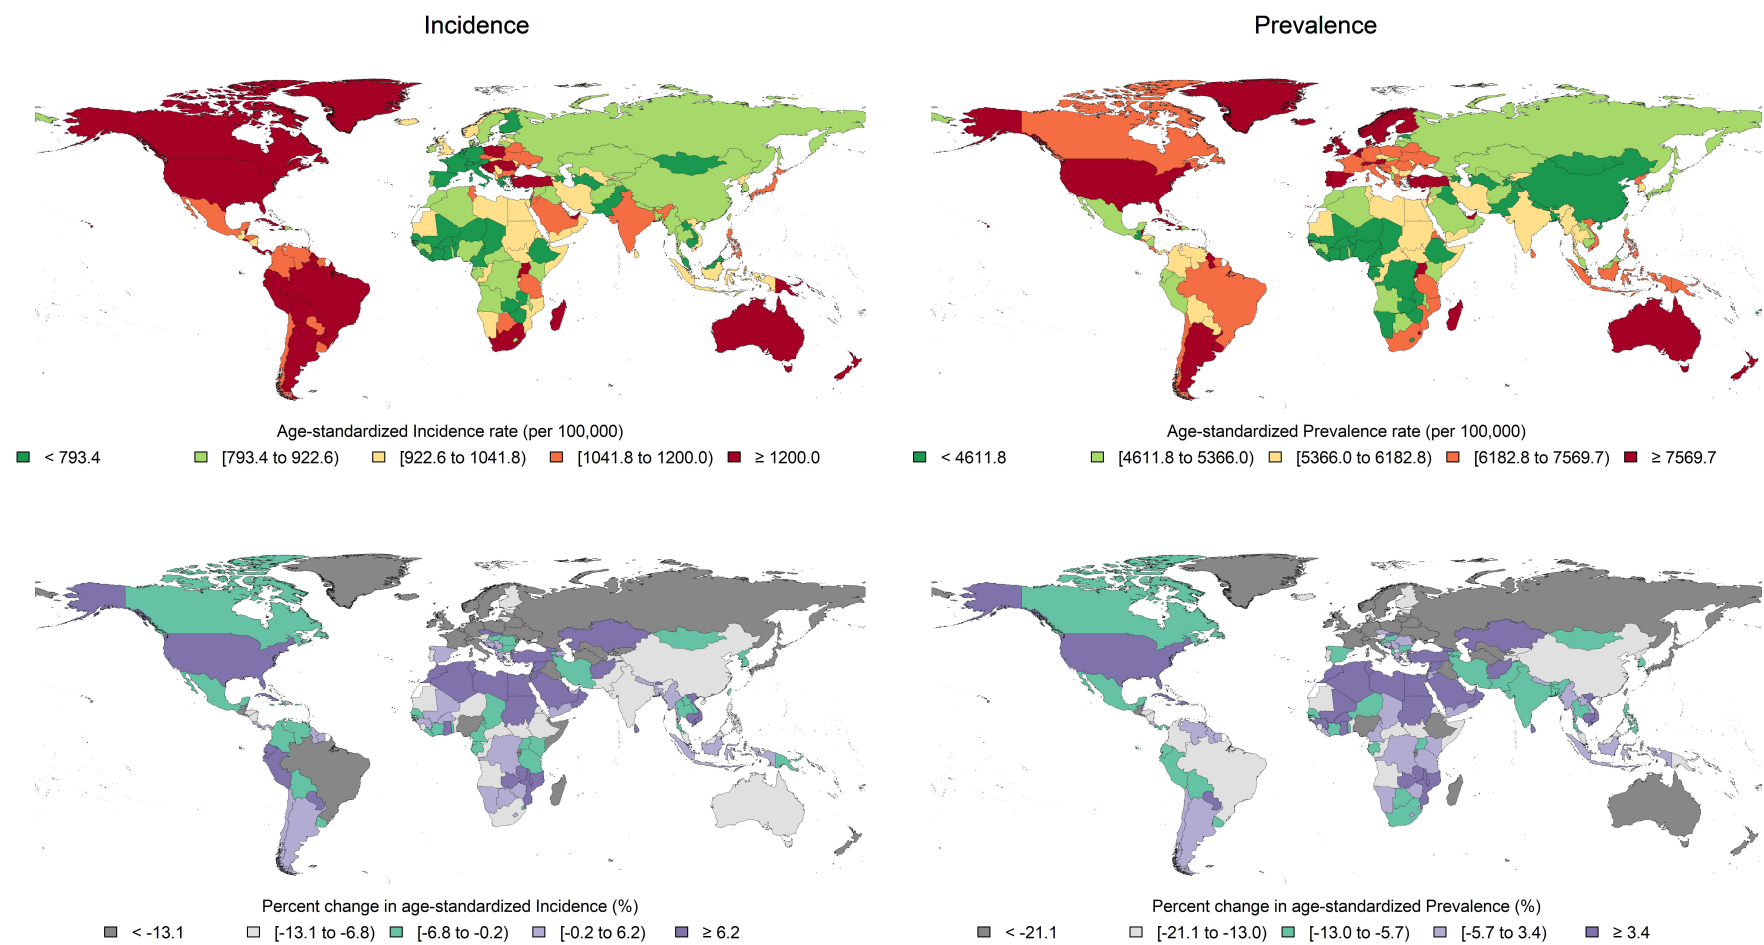

Figure S5. Age-standardised rate of prevalence and incidence of chronic respiratory diseases in 2019 and their percent change from 1990 to 2019 in women

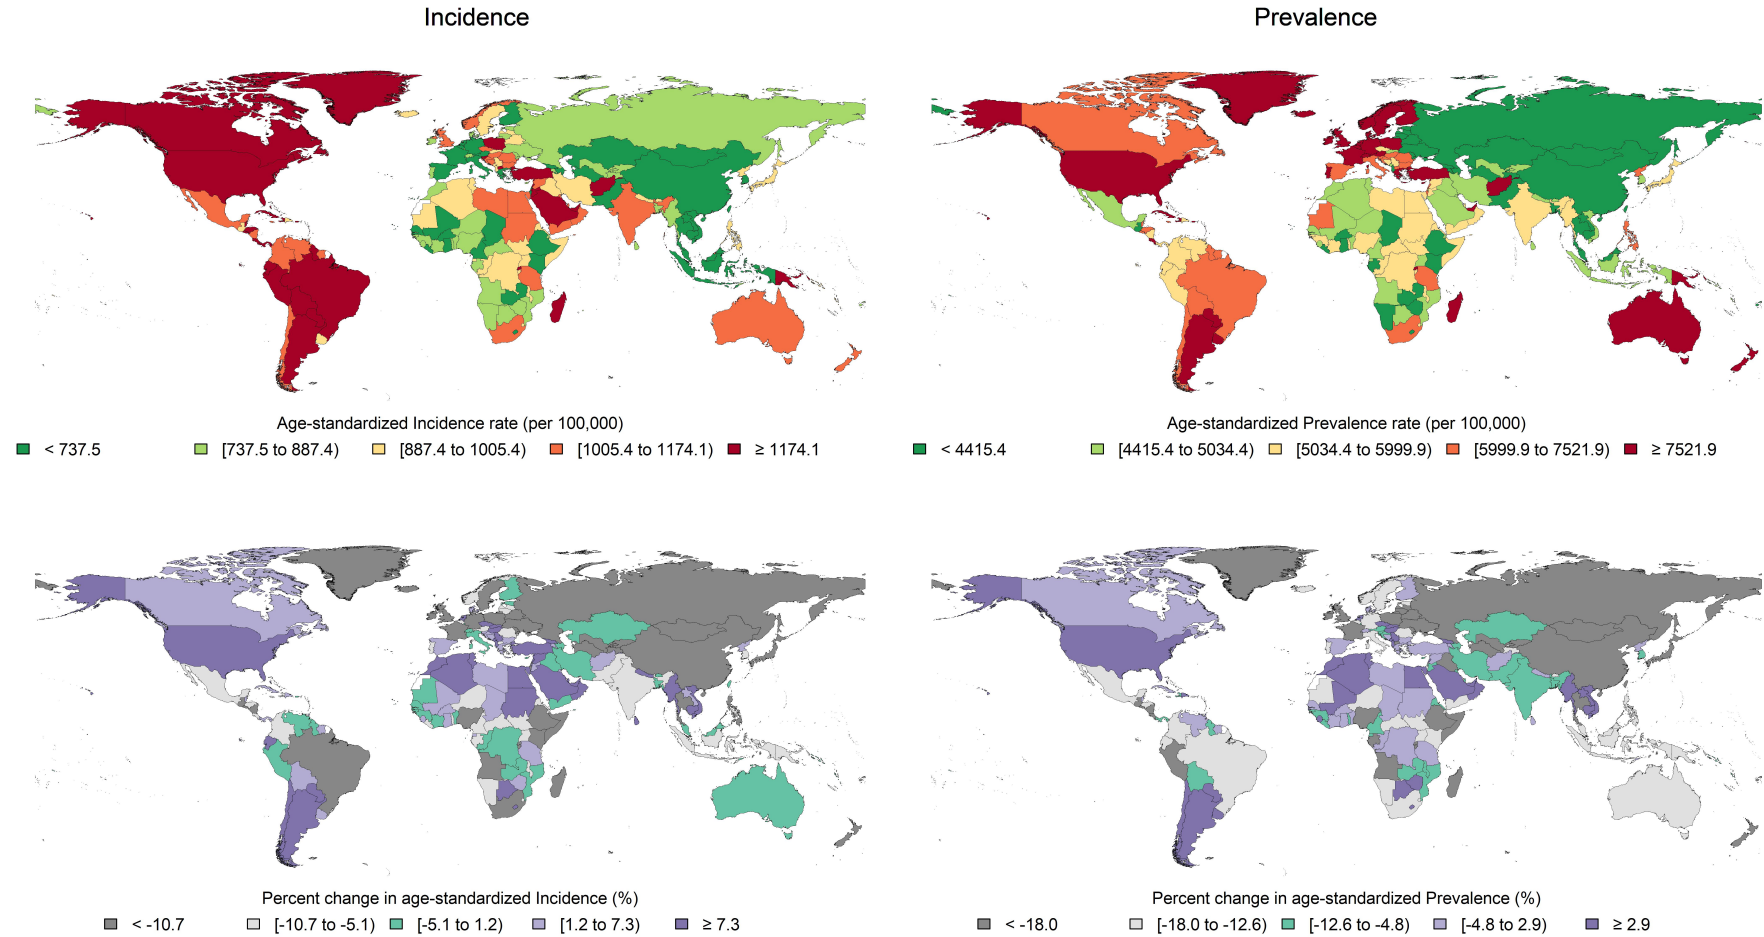

Figure S6. Absolute death rate due to chronic respiratory diseases by age and sex, 1990 and 2019

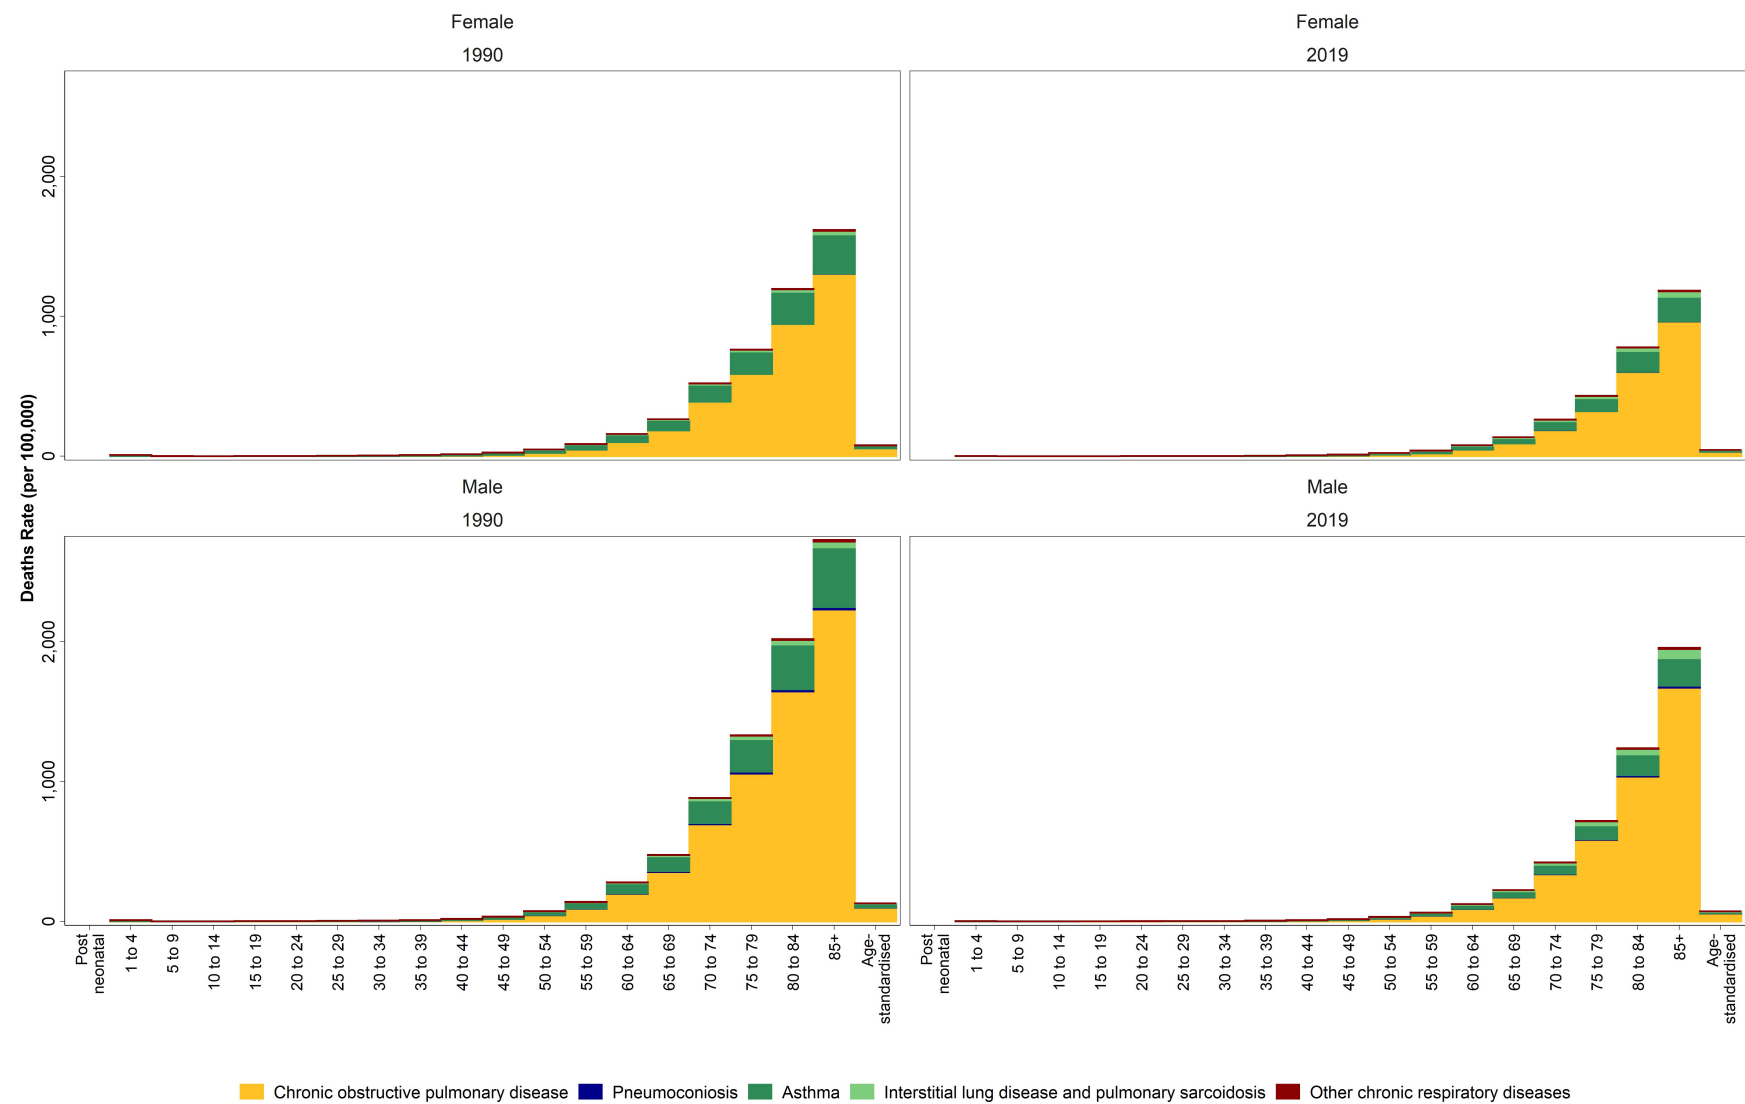

Figure S7. Absolute prevalence rate due to chronic respiratory diseases by age and sex, 1990 and 2019

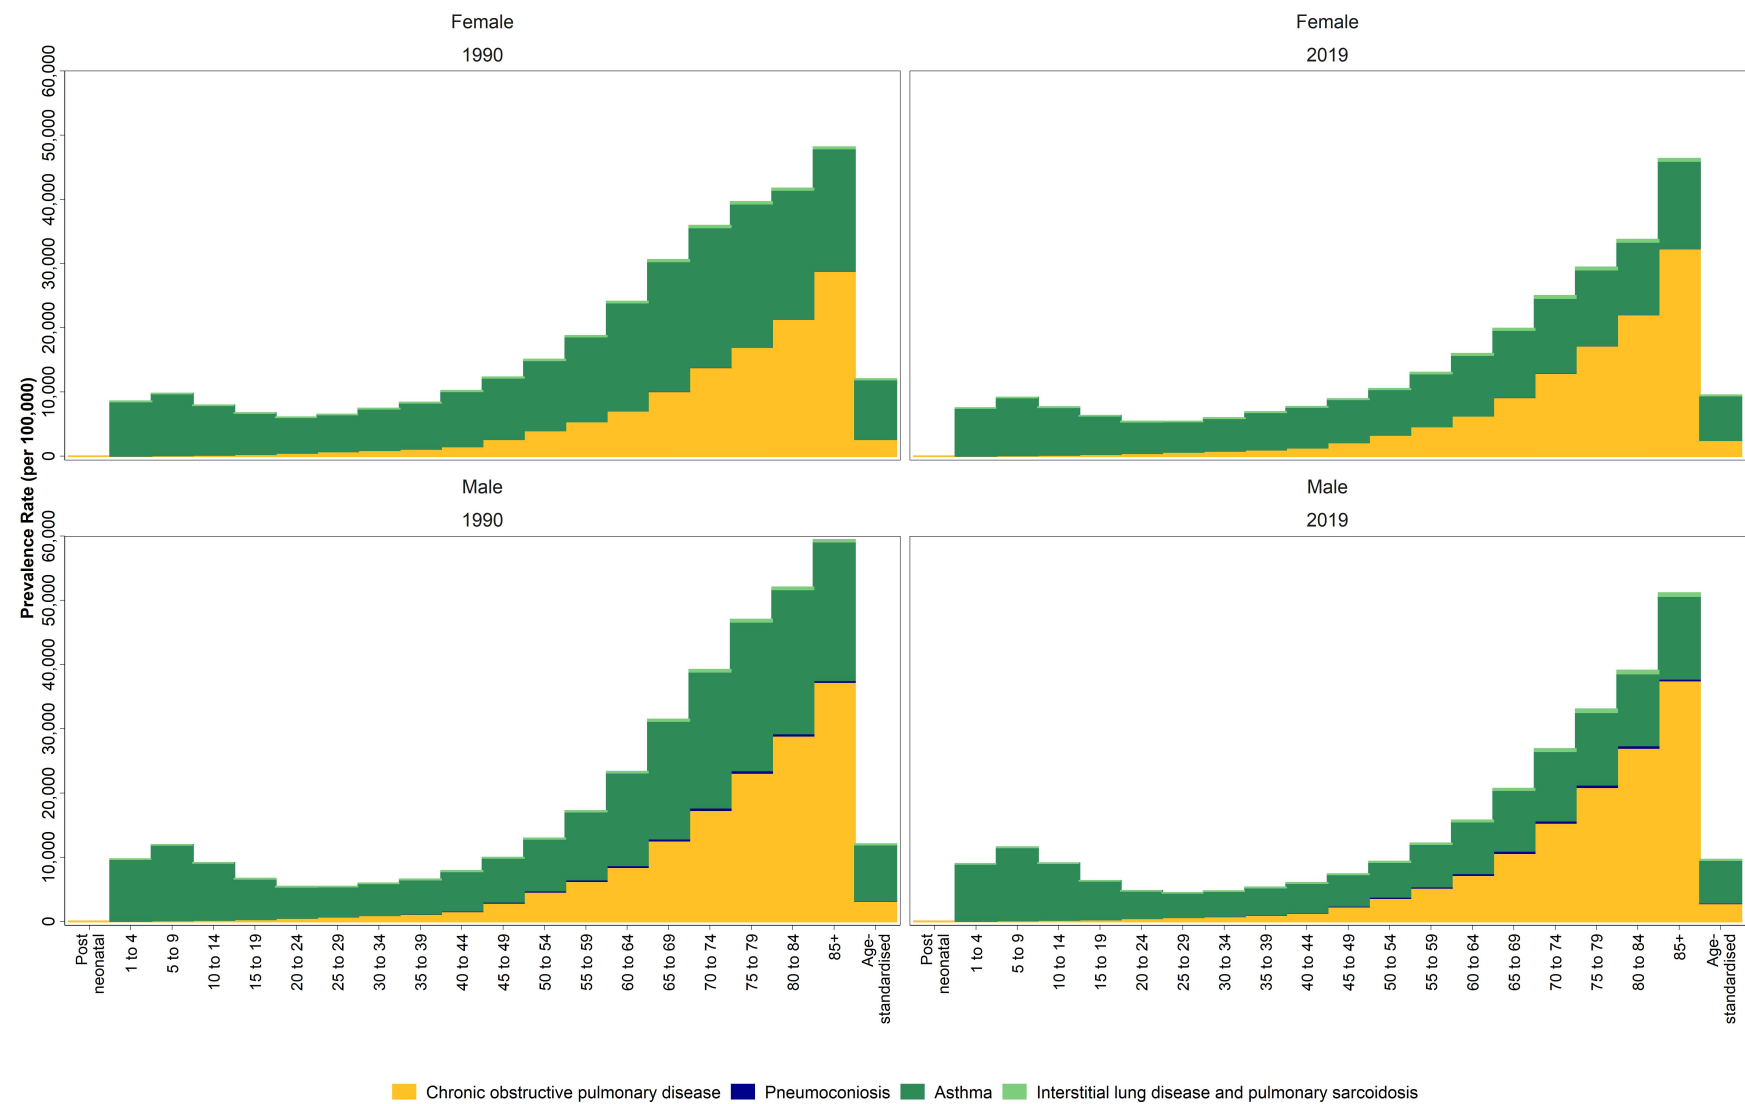

Figure S8. Absolute incidence rate due to chronic respiratory diseases by age, 2019 and sex, 1990 and 2019

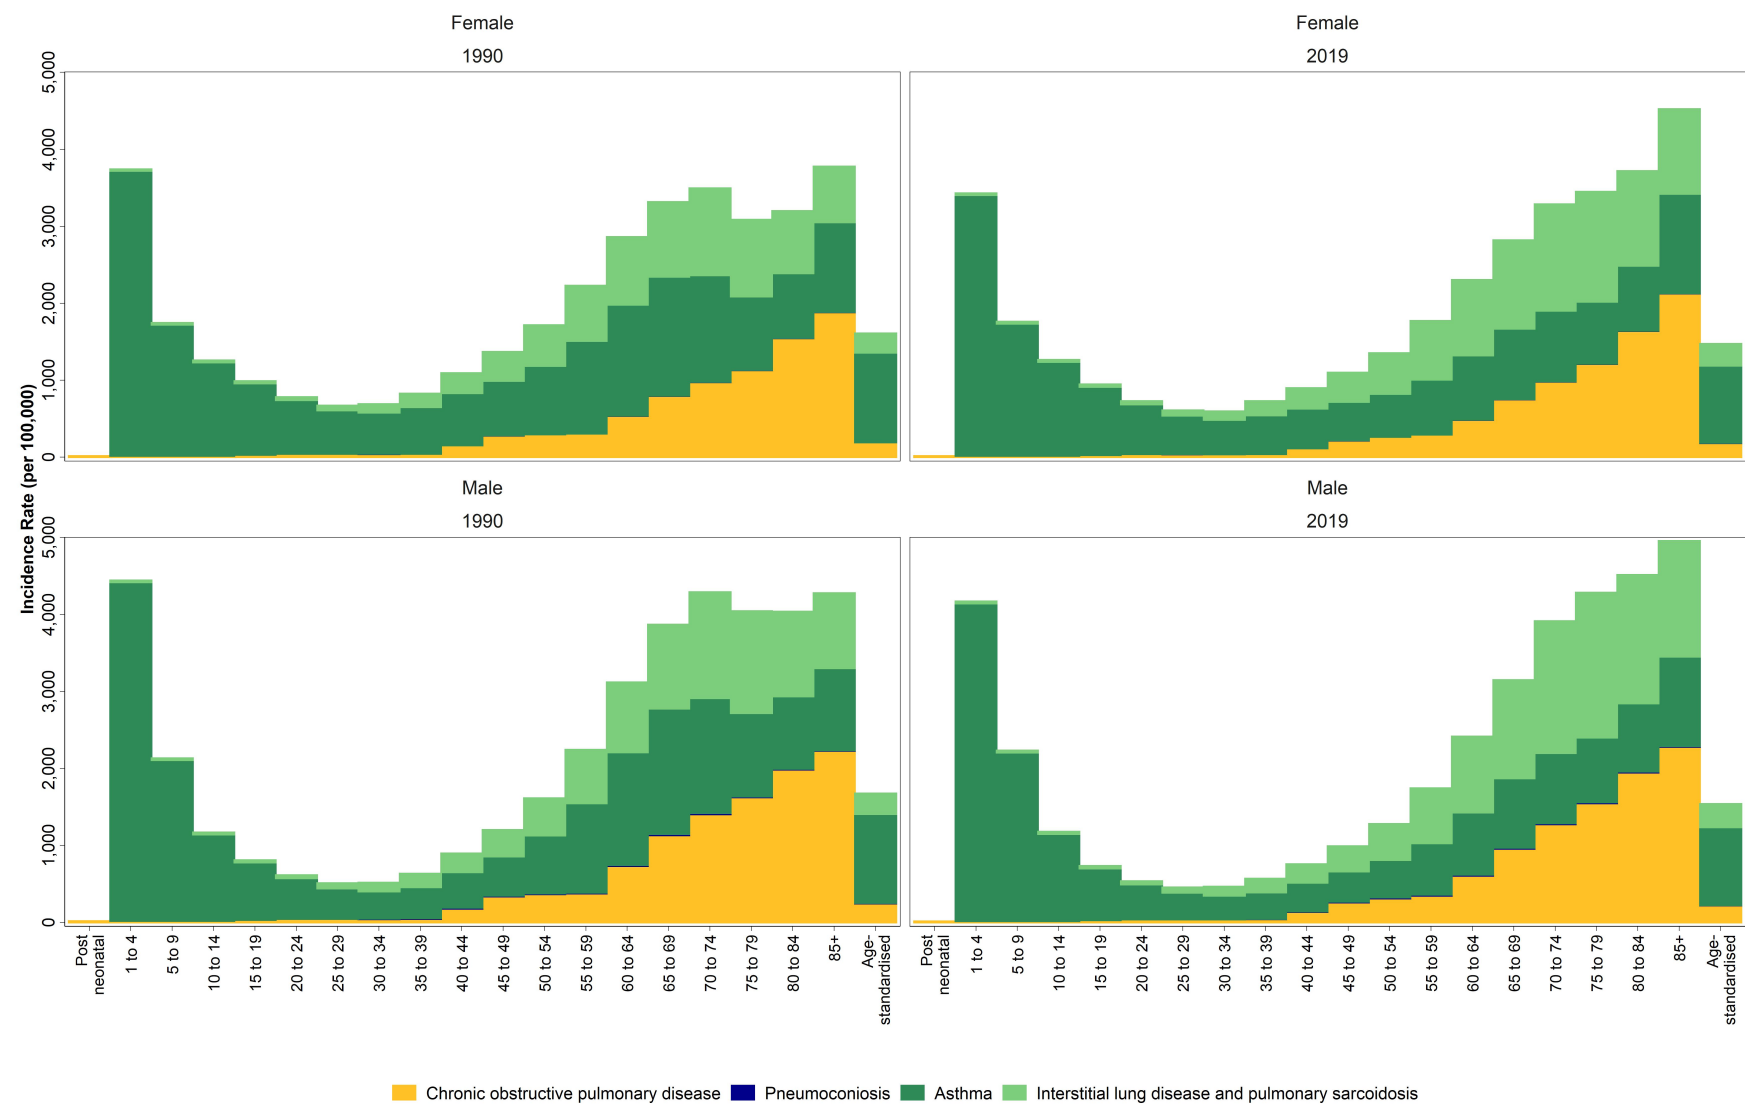

Figure S9. Contribution of YLLs and YLDs to age-standardised and age-specific DALYs from chronic respiratory diseases, 2019

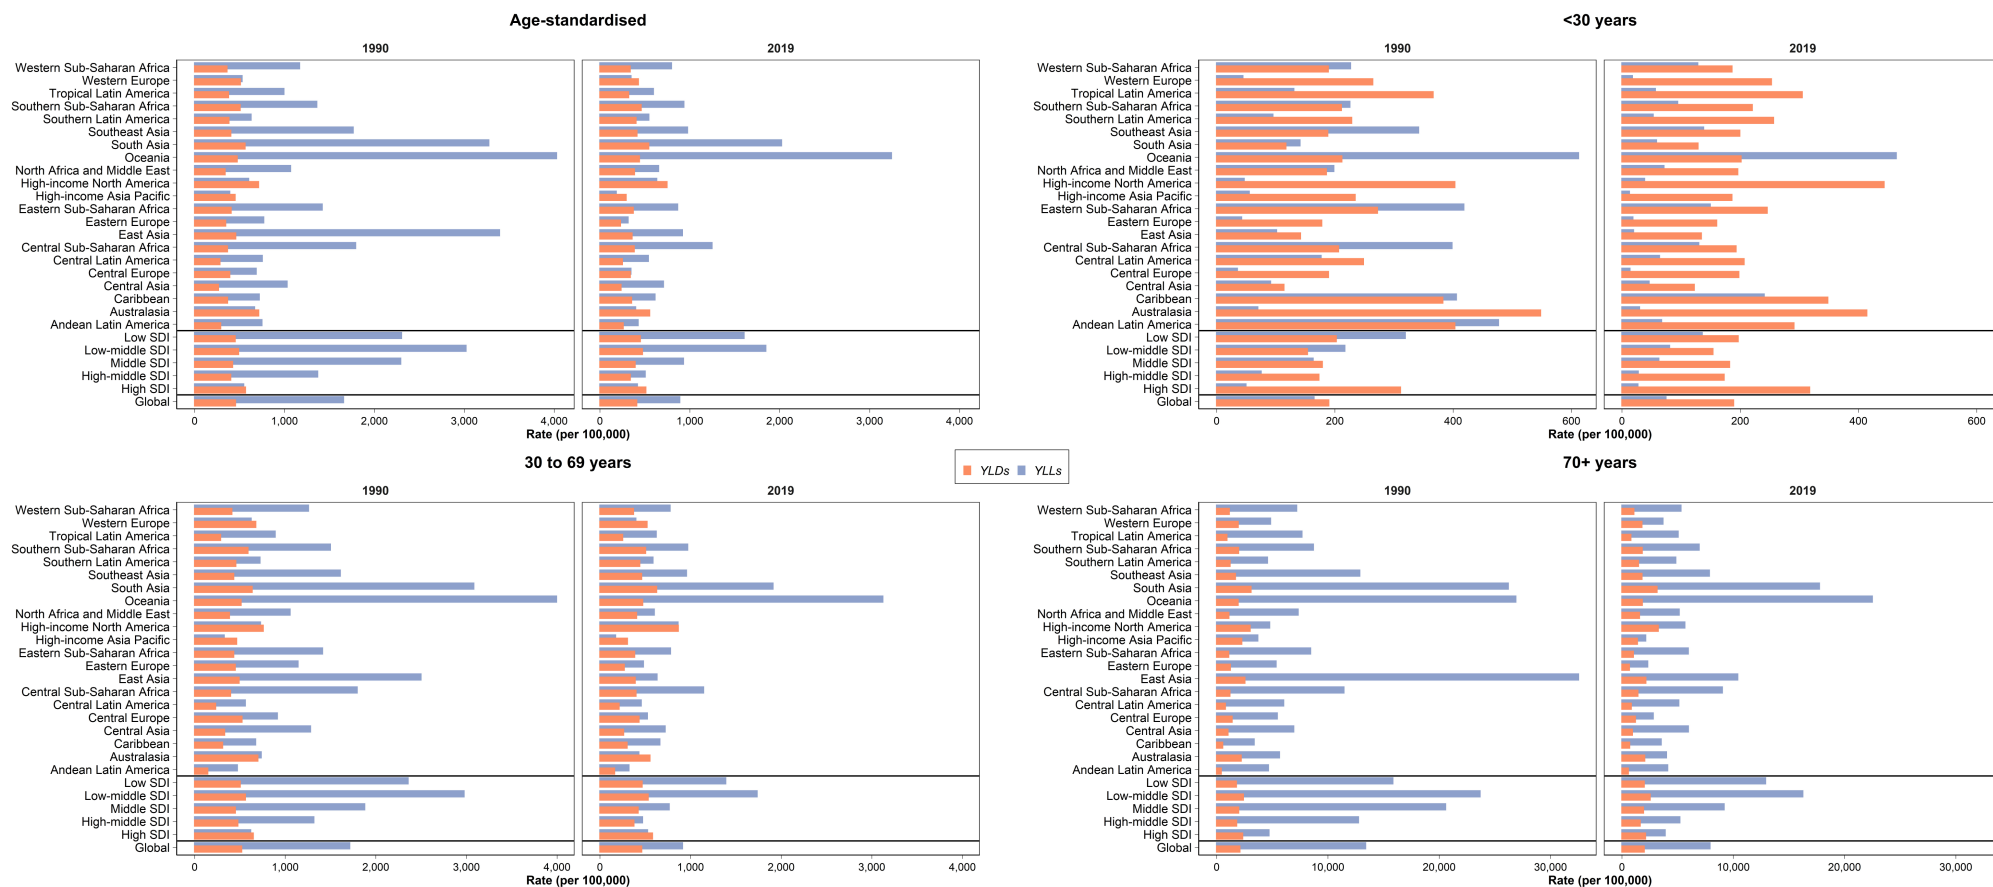

Figure S10. Correlation between the SDI and age-standardised DALYs rates due to chronic respiratory diseases in 1990, 2000, 2010, and 2019 globally

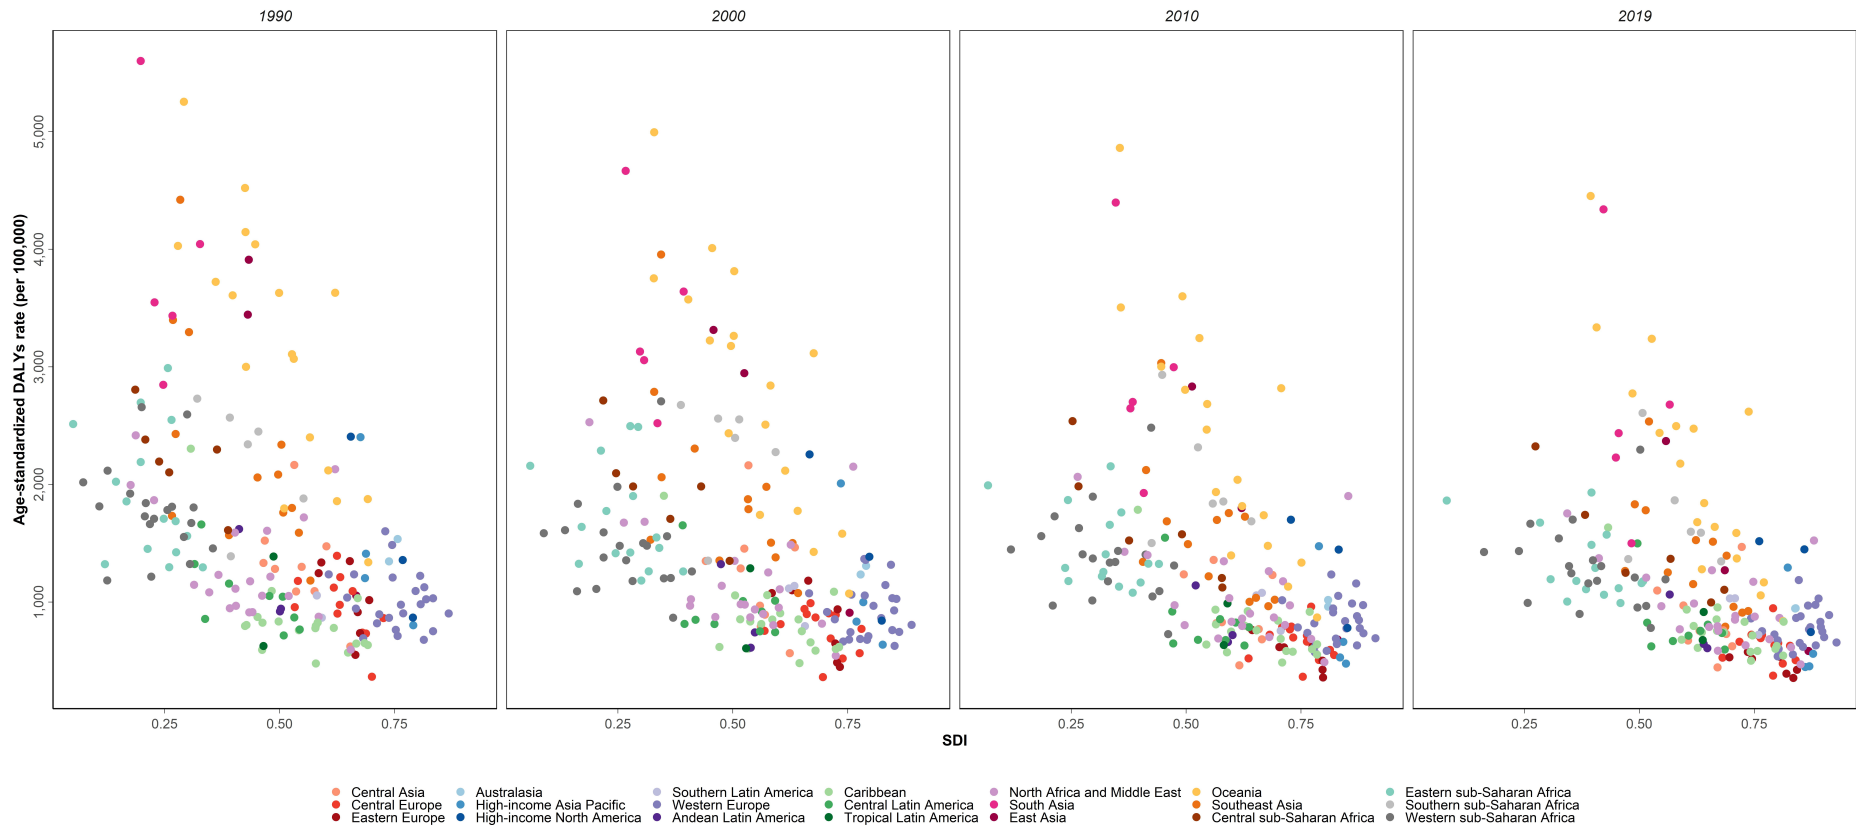

\* Each country is represented by a point color coded according to the 21 GBD regions.

Figure S11. Correlation between the SDI and age-standardised death rates due to chronic respiratory diseases in 1990, 2000, 2010, and 2019 globally

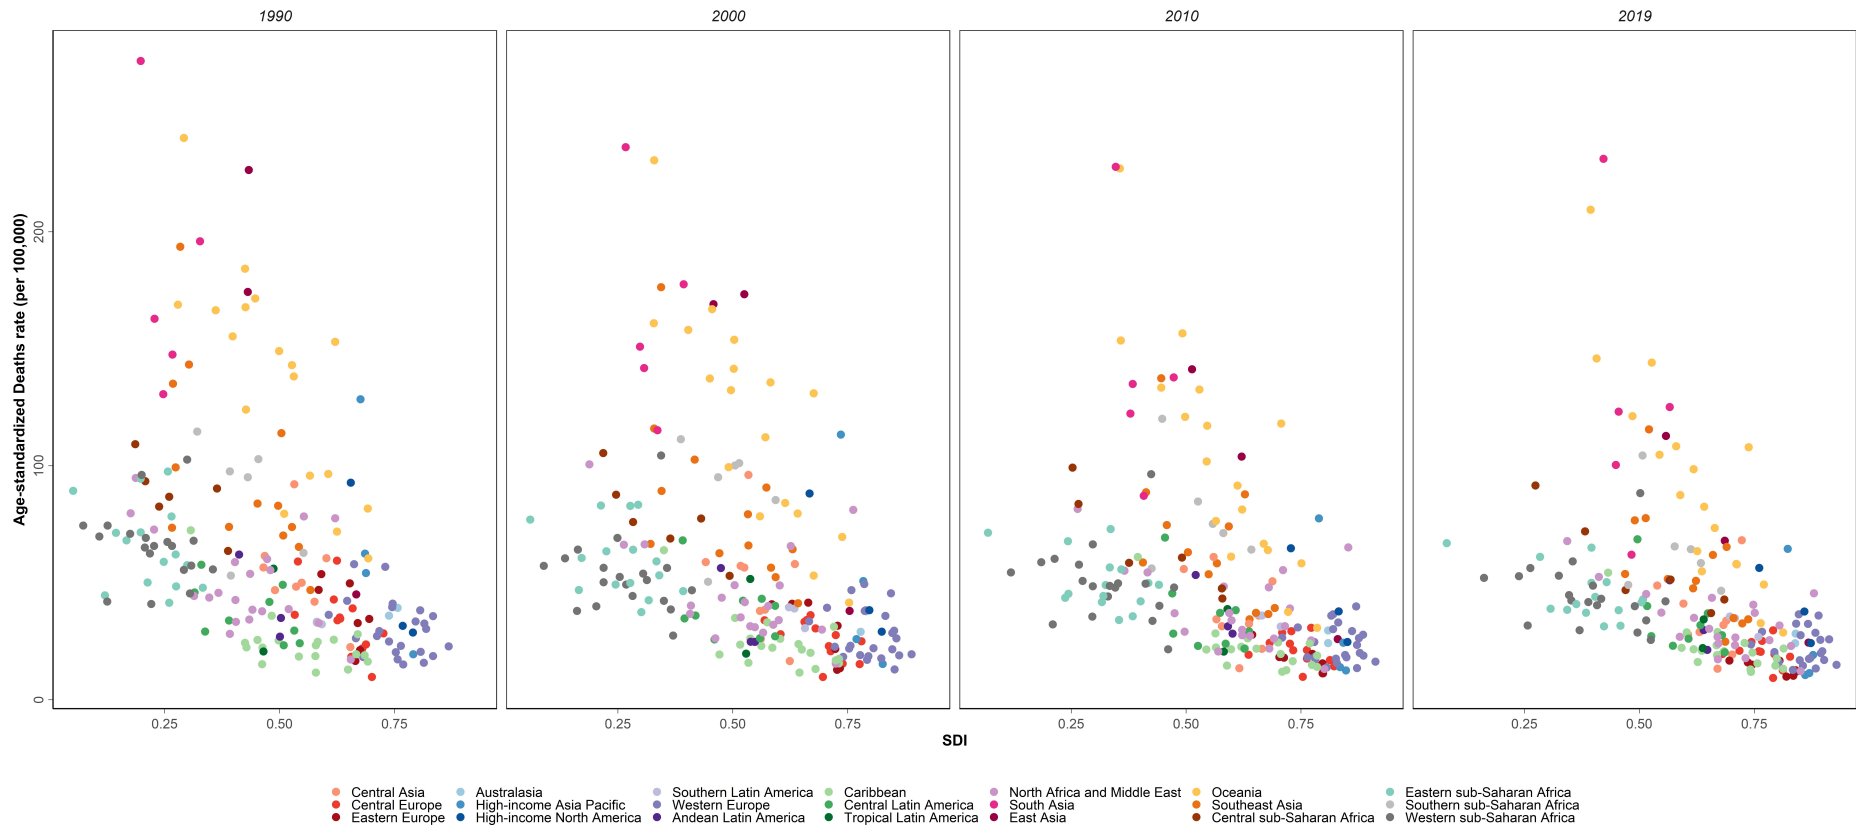

\* Each country is represented by a point color coded according to the 21 GBD regions.

Figure S12. Correlation between the SDI and age-standardised prevalence rates due to chronic respiratory diseases in 1990, 2000, 2010, and 2019 globally

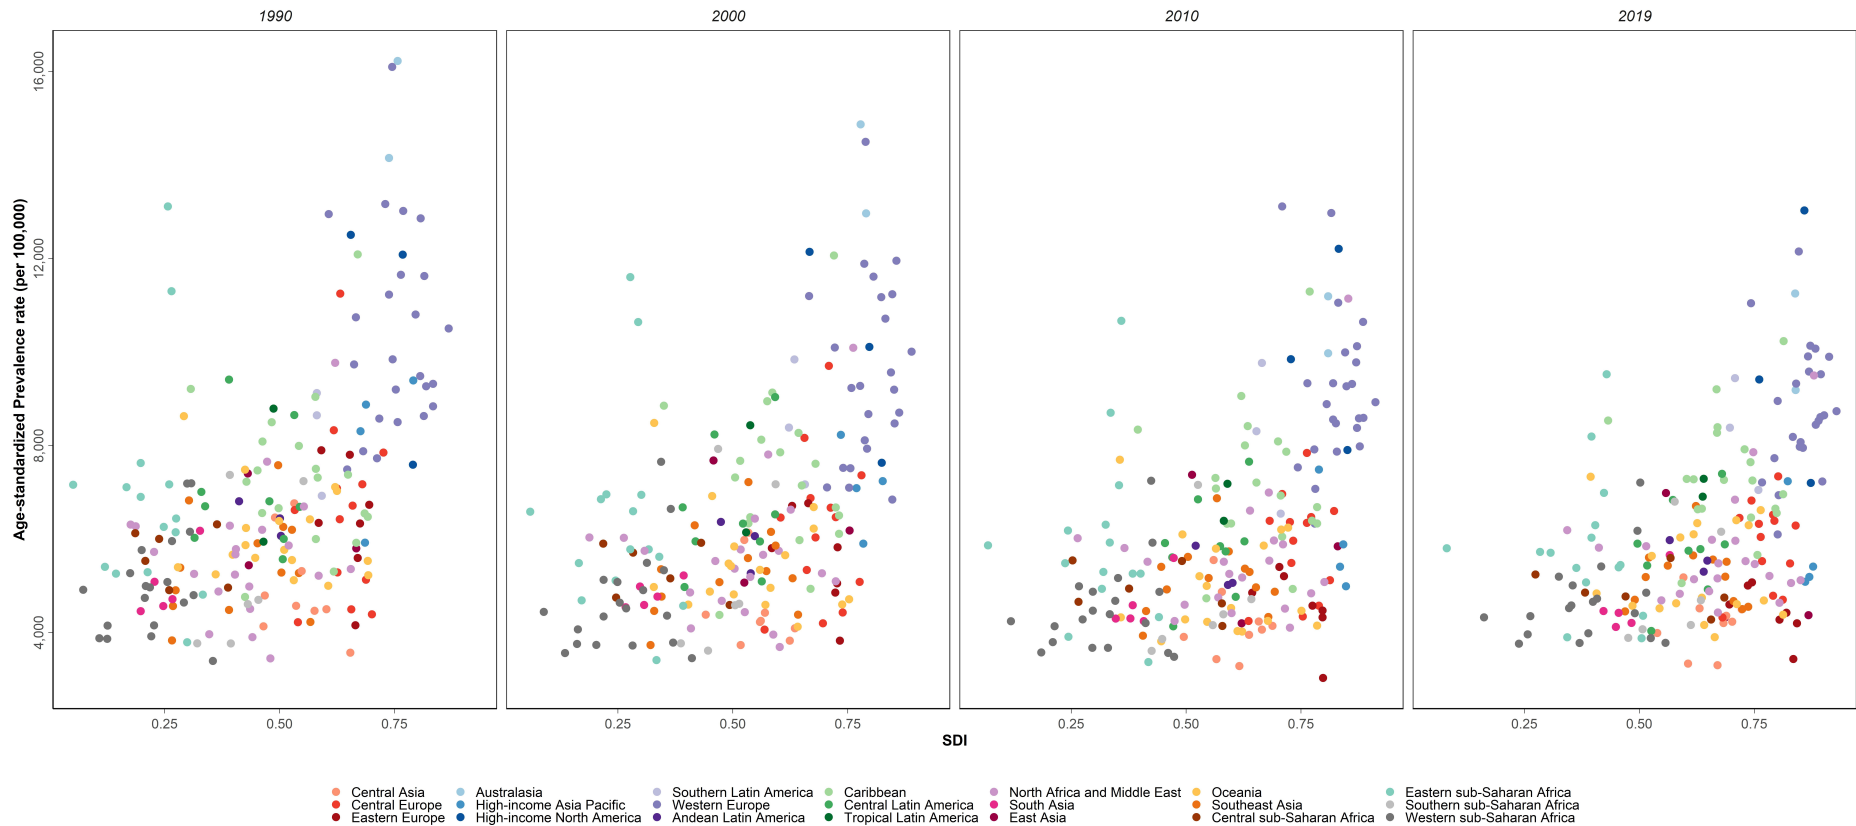

\* Each country is represented by a point color coded according to the 21 GBD regions.

Figure S13. Correlation between the SDI and age-standardised incidence rates due to chronic respiratory diseases in 1990, 2000, 2010, and 2019 globally

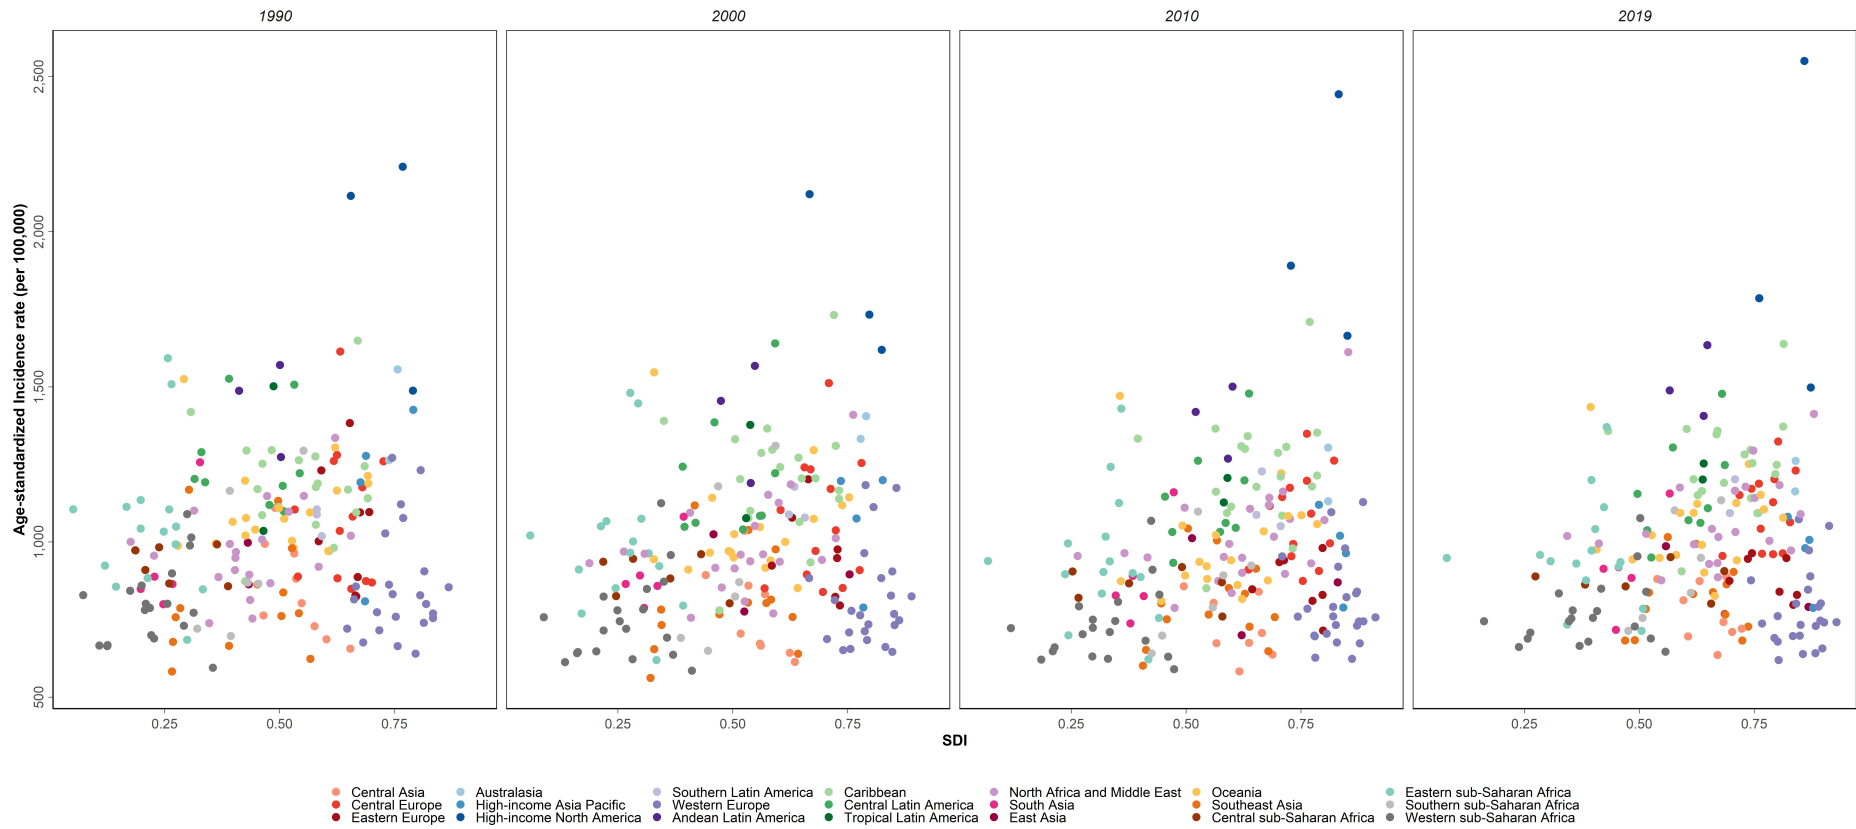

\* Each country is represented by a point color coded according to the 21 GBD regions.

**Figure S14. Ranked contribution of the specific sub-causes to the age-standardised DALYs from chronic respiratory diseases by region, 2019, for both sexes, females, and males**

|                                                     |        |          |                 |            |                |         |                      |             |           |              |                |                       |                            |           |                |                            |                          |                           |                              |         |            |                |                        |                             |                        |                |                            |
|-----------------------------------------------------|--------|----------|-----------------|------------|----------------|---------|----------------------|-------------|-----------|--------------|----------------|-----------------------|----------------------------|-----------|----------------|----------------------------|--------------------------|---------------------------|------------------------------|---------|------------|----------------|------------------------|-----------------------------|------------------------|----------------|----------------------------|
| Pneumoconiosis                                      | 5      | 5        | 5               | 5          | 5              | 5       | 5                    | 5           | 5         | 5            | 5              | 5                     | 3                          | 5         | 5              | 5                          | 5                        | 5                         | 5                            | 5       | 5          | 5              | 5                      | 5                           | 5                      | 5              | Both                       |
| Other chronic respiratory diseases                  | 4      | 4        | 4               | 3          | 4              | 4       | 4                    | 4           | 3         | 4            | 4              | 3                     | 4                          | 3         | 3              | 4                          | 4                        | 4                         | 3                            | 4       | 3          | 4              | 3                      | 4                           | 4                      | 3              |                            |
| Interstitial lung disease and pulmonary sarcoidosis | 3      | 3        | 3               | 4          | 3              | 3       | 3                    | 3           | 4         | 4            | 3              | 3                     | 4                          | 5         | 4              | 4                          | 3                        | 3                         | 3                            | 4       | 3          | 4              | 3                      | 4                           | 3                      | 4              |                            |
| Asthma                                              | 2      | 2        | 2               | 2          | 2              | 2       | 2                    | 2           | 2         | 2            | 2              | 2                     | 2                          | 2         | 2              | 2                          | 2                        | 2                         | 2                            | 2       | 2          | 2              | 2                      | 2                           | 2                      | 2              |                            |
| Chronic obstructive pulmonary disease               | 1      | 1        | 1               | 1          | 1              | 1       | 1                    | 1           | 1         | 1            | 1              | 1                     | 1                          | 1         | 1              | 1                          | 1                        | 1                         | 1                            | 1       | 1          | 1              | 1                      | 1                           | 1                      | 1              |                            |
| Pneumoconiosis                                      | 5      | 5        | 5               | 5          | 5              | 5       | 5                    | 5           | 5         | 5            | 5              | 5                     | 5                          | 5         | 5              | 5                          | 5                        | 5                         | 5                            | 5       | 5          | 5              | 5                      | 5                           | 5                      | 5              | Female                     |
| Other chronic respiratory diseases                  | 4      | 4        | 4               | 3          | 4              | 4       | 4                    | 3           | 4         | 4            | 4              | 3                     | 3                          | 3         | 3              | 4                          | 4                        | 4                         | 4                            | 4       | 4          | 3              | 4                      | 3                           | 4                      | 3              |                            |
| Interstitial lung disease and pulmonary sarcoidosis | 3      | 3        | 3               | 4          | 3              | 3       | 3                    | 3           | 4         | 3            | 3              | 3                     | 4                          | 4         | 4              | 4                          | 3                        | 3                         | 3                            | 3       | 3          | 4              | 3                      | 4                           | 3                      | 4              |                            |
| Asthma                                              | 2      | 2        | 2               | 2          | 2              | 2       | 2                    | 2           | 2         | 2            | 2              | 2                     | 2                          | 2         | 2              | 2                          | 1                        | 2                         | 2                            | 2       | 2          | 2              | 2                      | 2                           | 2                      | 2              |                            |
| Chronic obstructive pulmonary disease               | 1      | 1        | 1               | 1          | 1              | 1       | 1                    | 1           | 2         | 1            | 1              | 1                     | 1                          | 1         | 1              | 1                          | 2                        | 1                         | 1                            | 1       | 1          | 1              | 1                      | 1                           | 1                      | 1              |                            |
| Pneumoconiosis                                      | 5      | 5        | 5               | 5          | 5              | 5       | 5                    | 5           | 5         | 5            | 5              | 5                     | 3                          | 5         | 5              | 5                          | 5                        | 5                         | 5                            | 5       | 5          | 5              | 5                      | 5                           | 5                      | 5              | Male                       |
| Other chronic respiratory diseases                  | 4      | 4        | 4               | 3          | 4              | 4       | 4                    | 3           | 4         | 4            | 4              | 3                     | 4                          | 3         | 3              | 4                          | 4                        | 4                         | 4                            | 3       | 4          | 3              | 4                      | 4                           | 4                      | 3              |                            |
| Interstitial lung disease and pulmonary sarcoidosis | 3      | 3        | 3               | 4          | 3              | 3       | 3                    | 2           | 3         | 4            | 4              | 3                     | 4                          | 5         | 4              | 4                          | 3                        | 3                         | 3                            | 4       | 3          | 4              | 3                      | 3                           | 3                      | 4              |                            |
| Asthma                                              | 2      | 2        | 2               | 2          | 2              | 2       | 2                    | 3           | 2         | 2            | 2              | 2                     | 2                          | 2         | 2              | 2                          | 2                        | 2                         | 2                            | 2       | 2          | 2              | 2                      | 2                           | 2                      | 2              |                            |
| Chronic obstructive pulmonary disease               | 1      | 1        | 1               | 1          | 1              | 1       | 1                    | 1           | 1         | 1            | 1              | 1                     | 1                          | 1         | 1              | 1                          | 1                        | 1                         | 1                            | 1       | 1          | 1              | 1                      | 1                           | 1                      | 1              |                            |
|                                                     | Global | High SDI | High-middle SDI | Middle SDI | Low-middle SDI | Low SDI | Andean Latin America | Australasia | Caribbean | Central Asia | Central Europe | Central Latin America | Central Sub-Saharan Africa | East Asia | Eastern Europe | Eastern Sub-Saharan Africa | High-income Asia Pacific | High-income North America | North Africa and Middle East | Oceania | South Asia | Southeast Asia | Southern Latin America | Southern Sub-Saharan Africa | Tropical Latin America | Western Europe | Western Sub-Saharan Africa |

Figure S15. Ranked contribution of risk factors to the age-standardised death from chronic respiratory diseases by region, 2019, for both sexes, females, and males

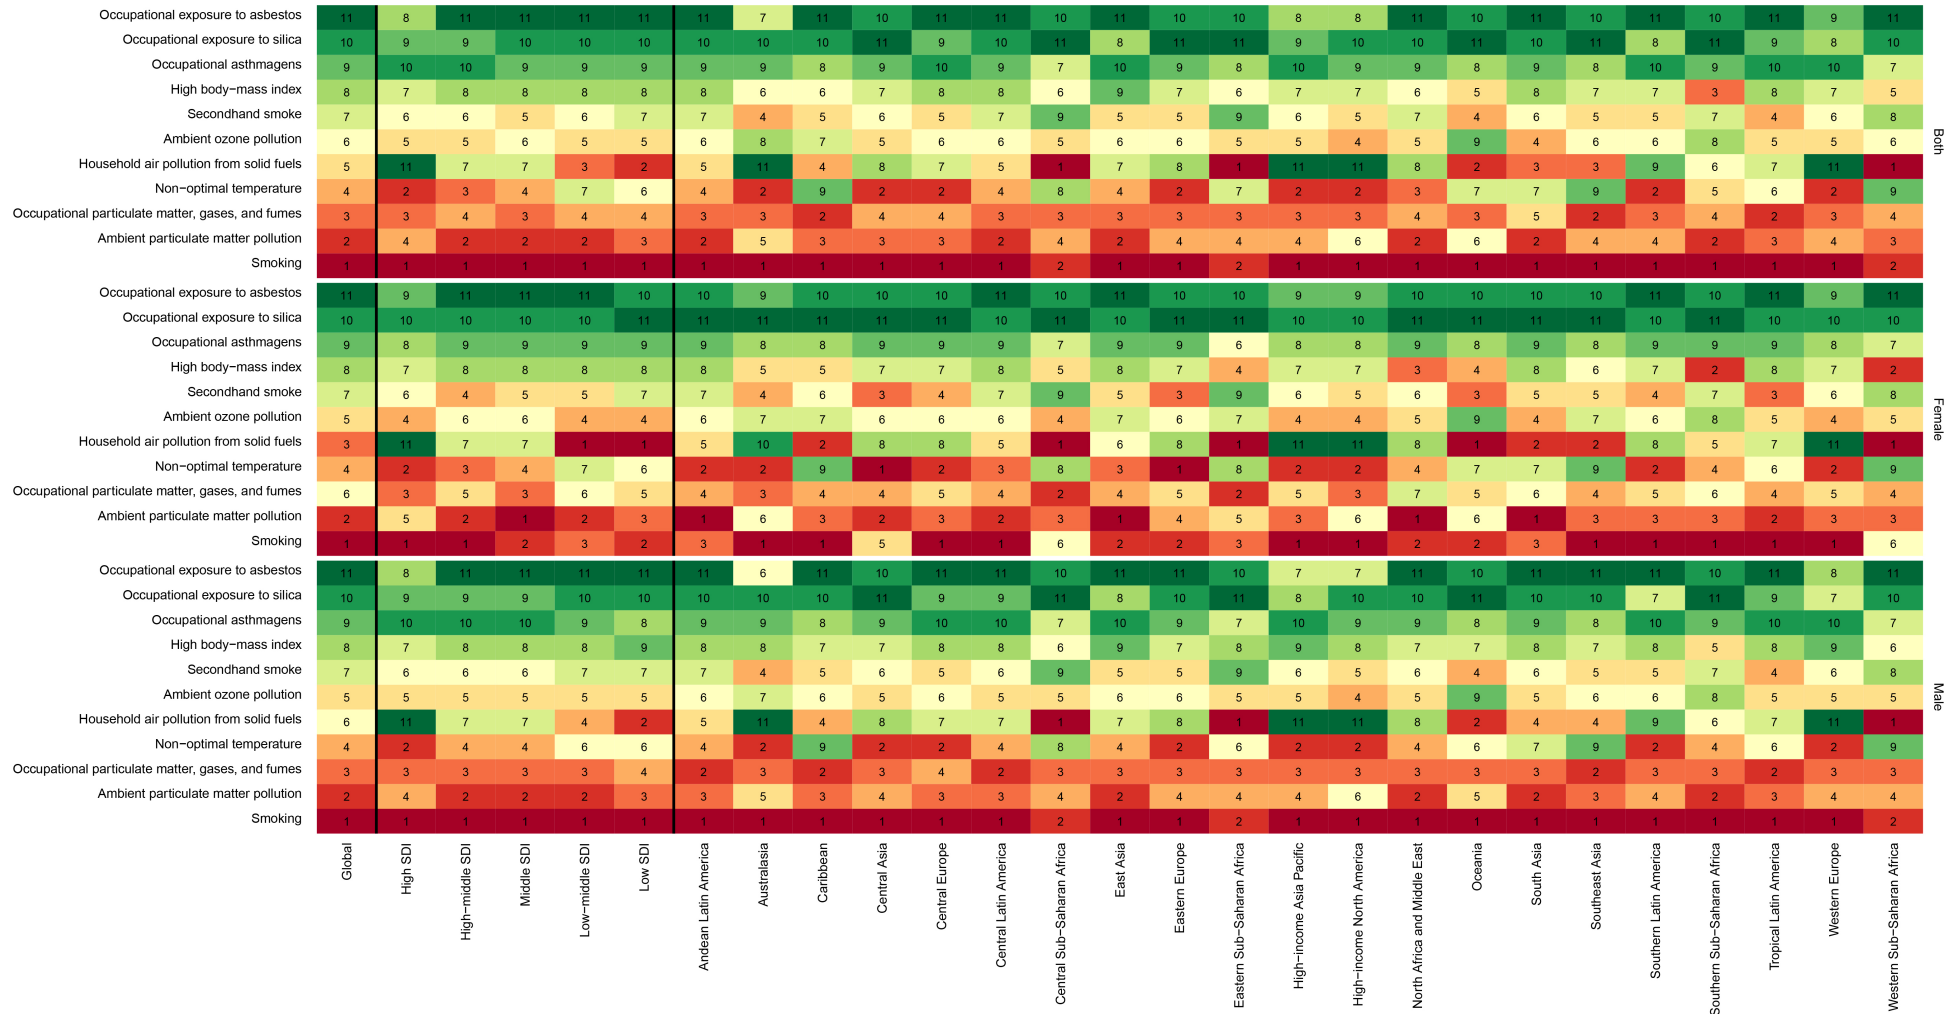

Figure S16. Age-standardised DALYs from chronic respiratory disease attributed to risk factors by sex and region in 1990 and 2019

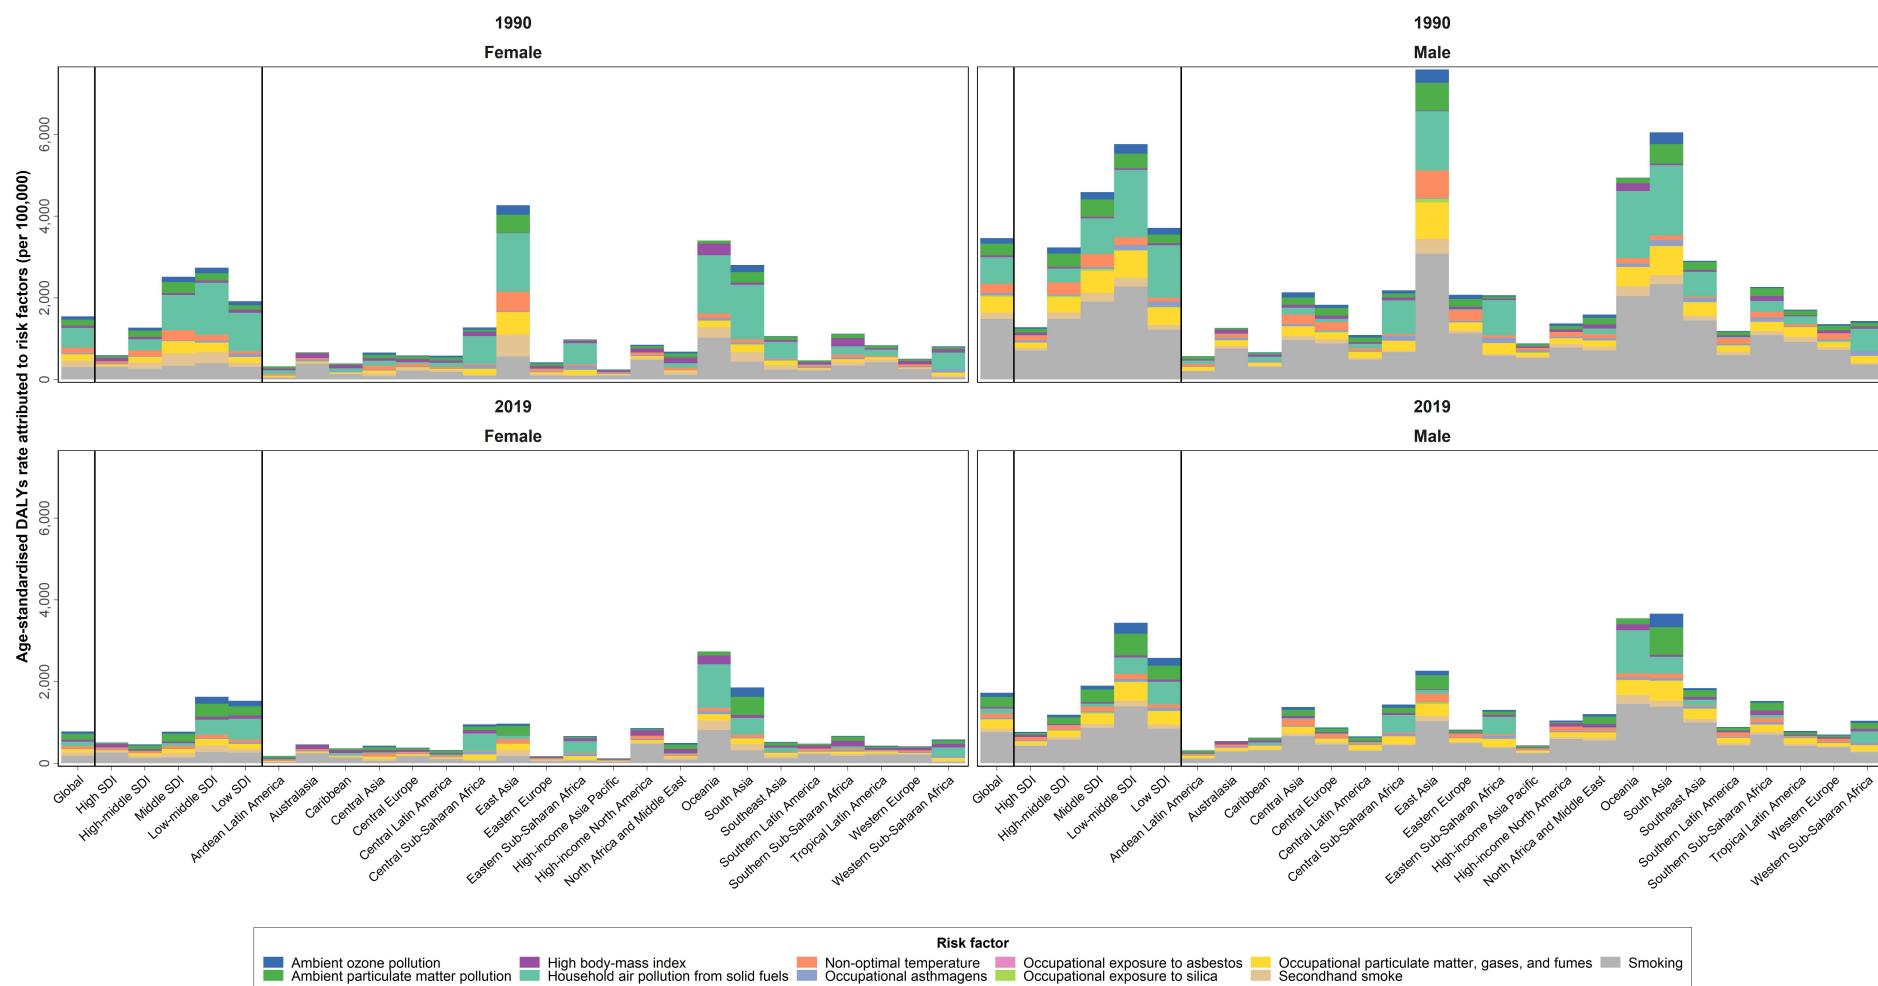

### B.3.1 Chronic obstructive pulmonary diseases (COPD)

Figure S17. Global age-standardised rates of incidence, prevalence, deaths, and DALYs of COPD by sex, 1990-2019

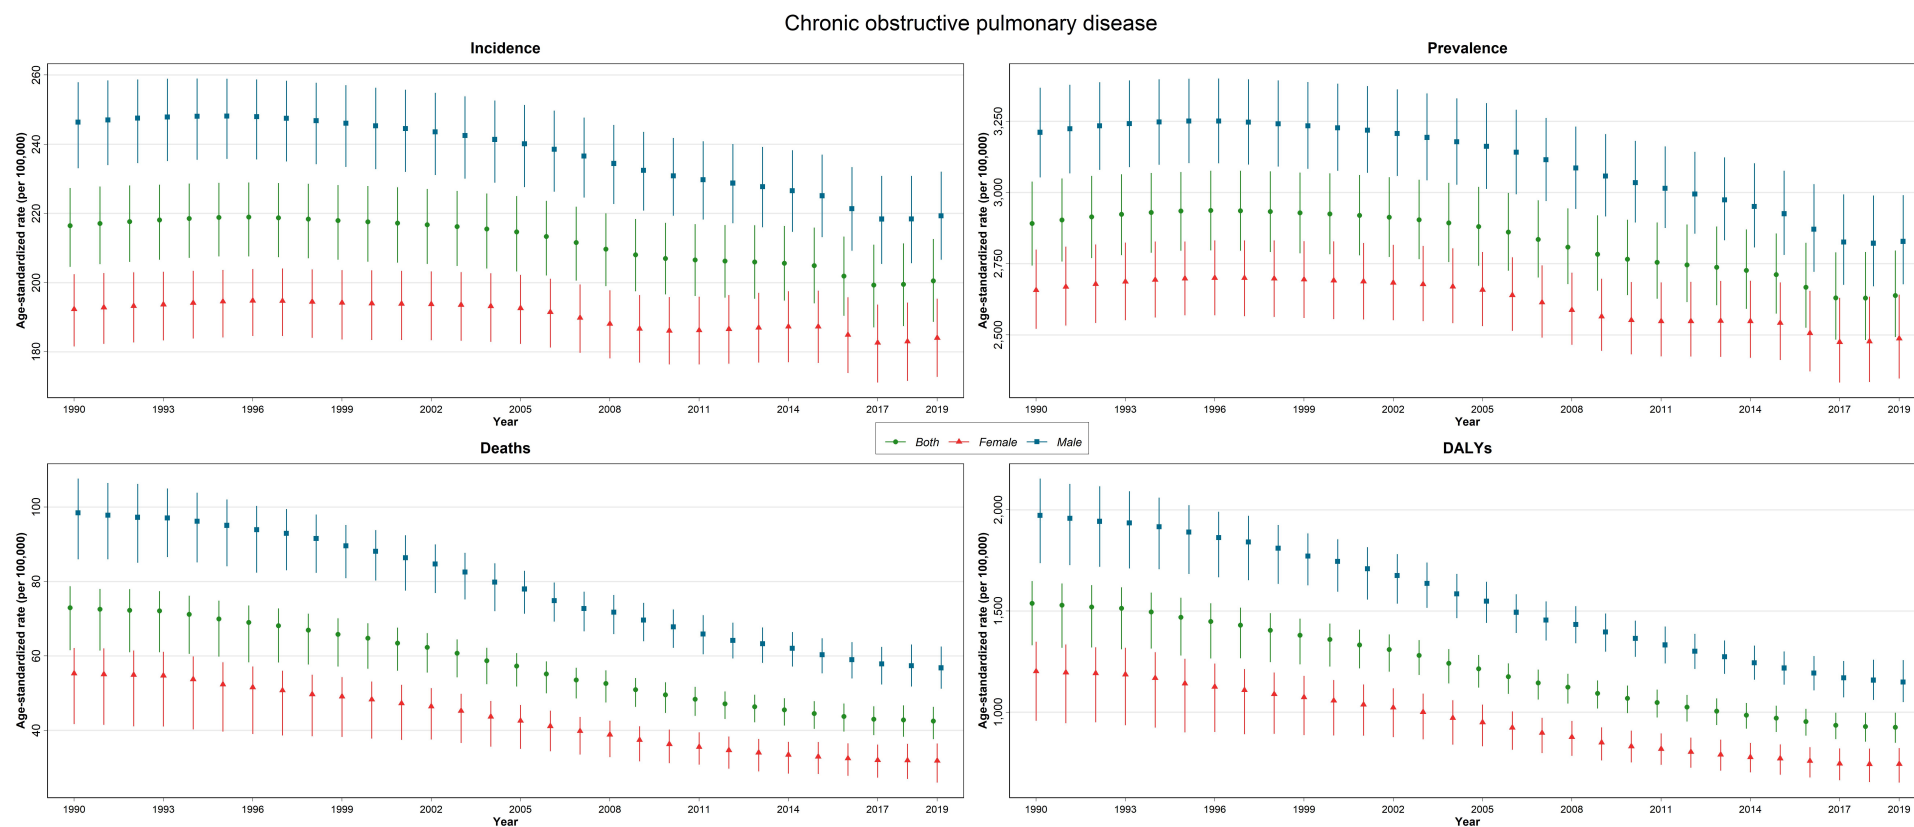

Figure S18. Global age-standardised rates of incidence, prevalence, deaths, and DALYs of COPD by SDI, both sexes, 1990-2019

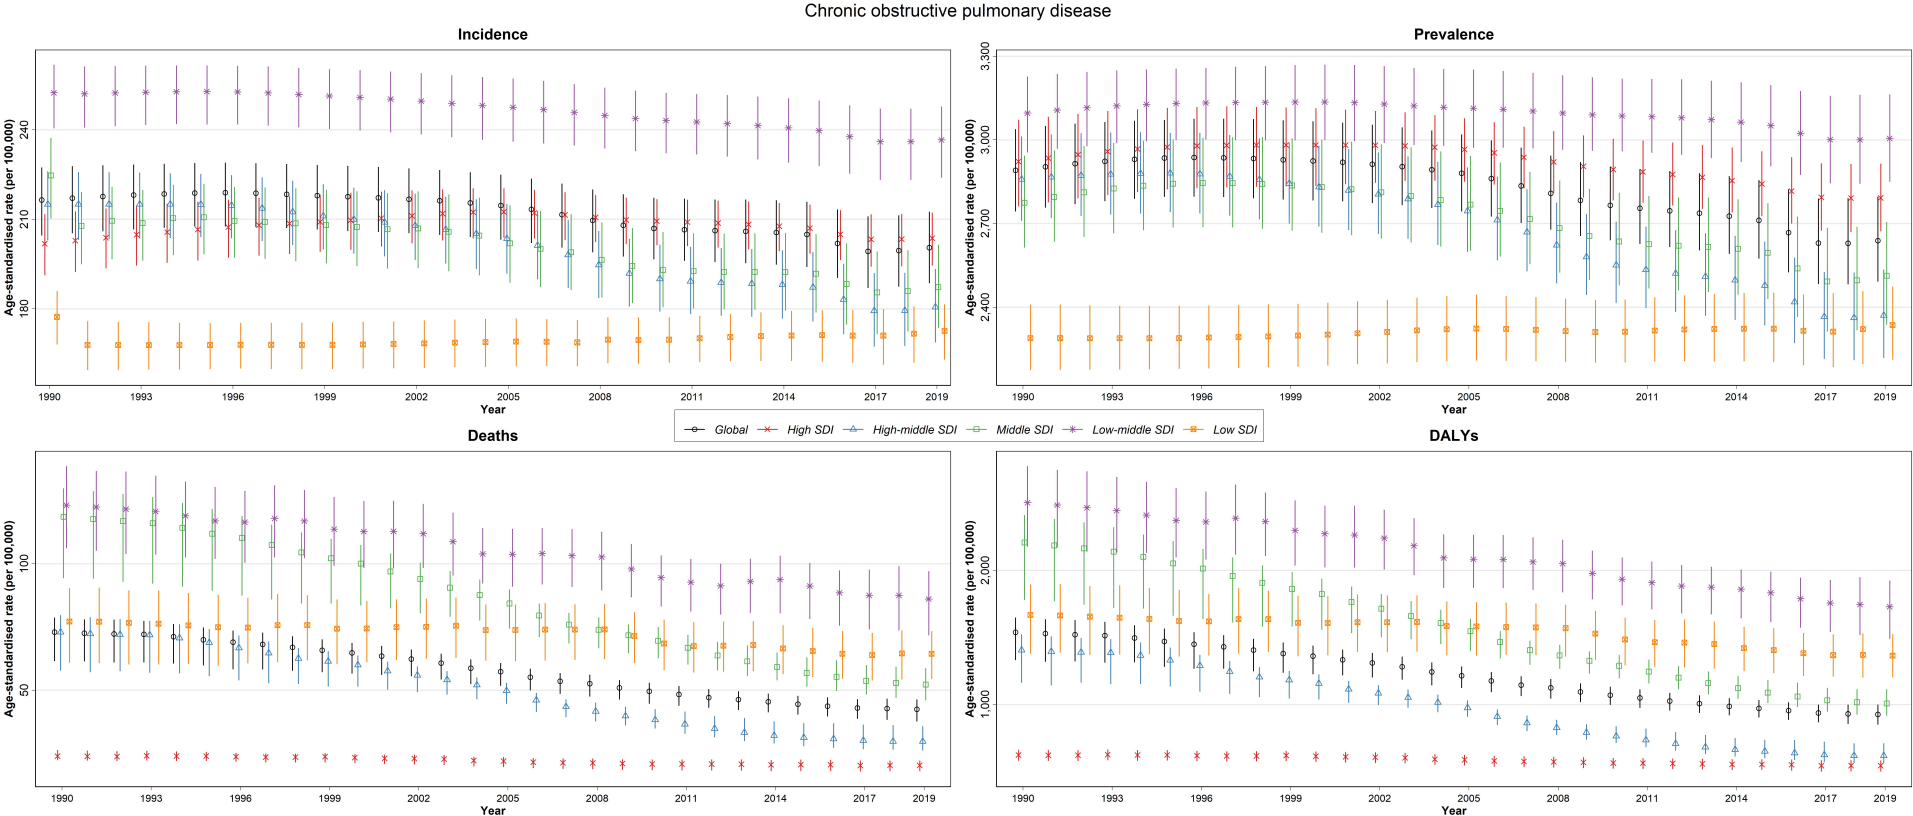

Figure S19. Ranked contribution of risk factors to the age-standardised DALYs from COPD by region, 2019, for both sexes, females, and males

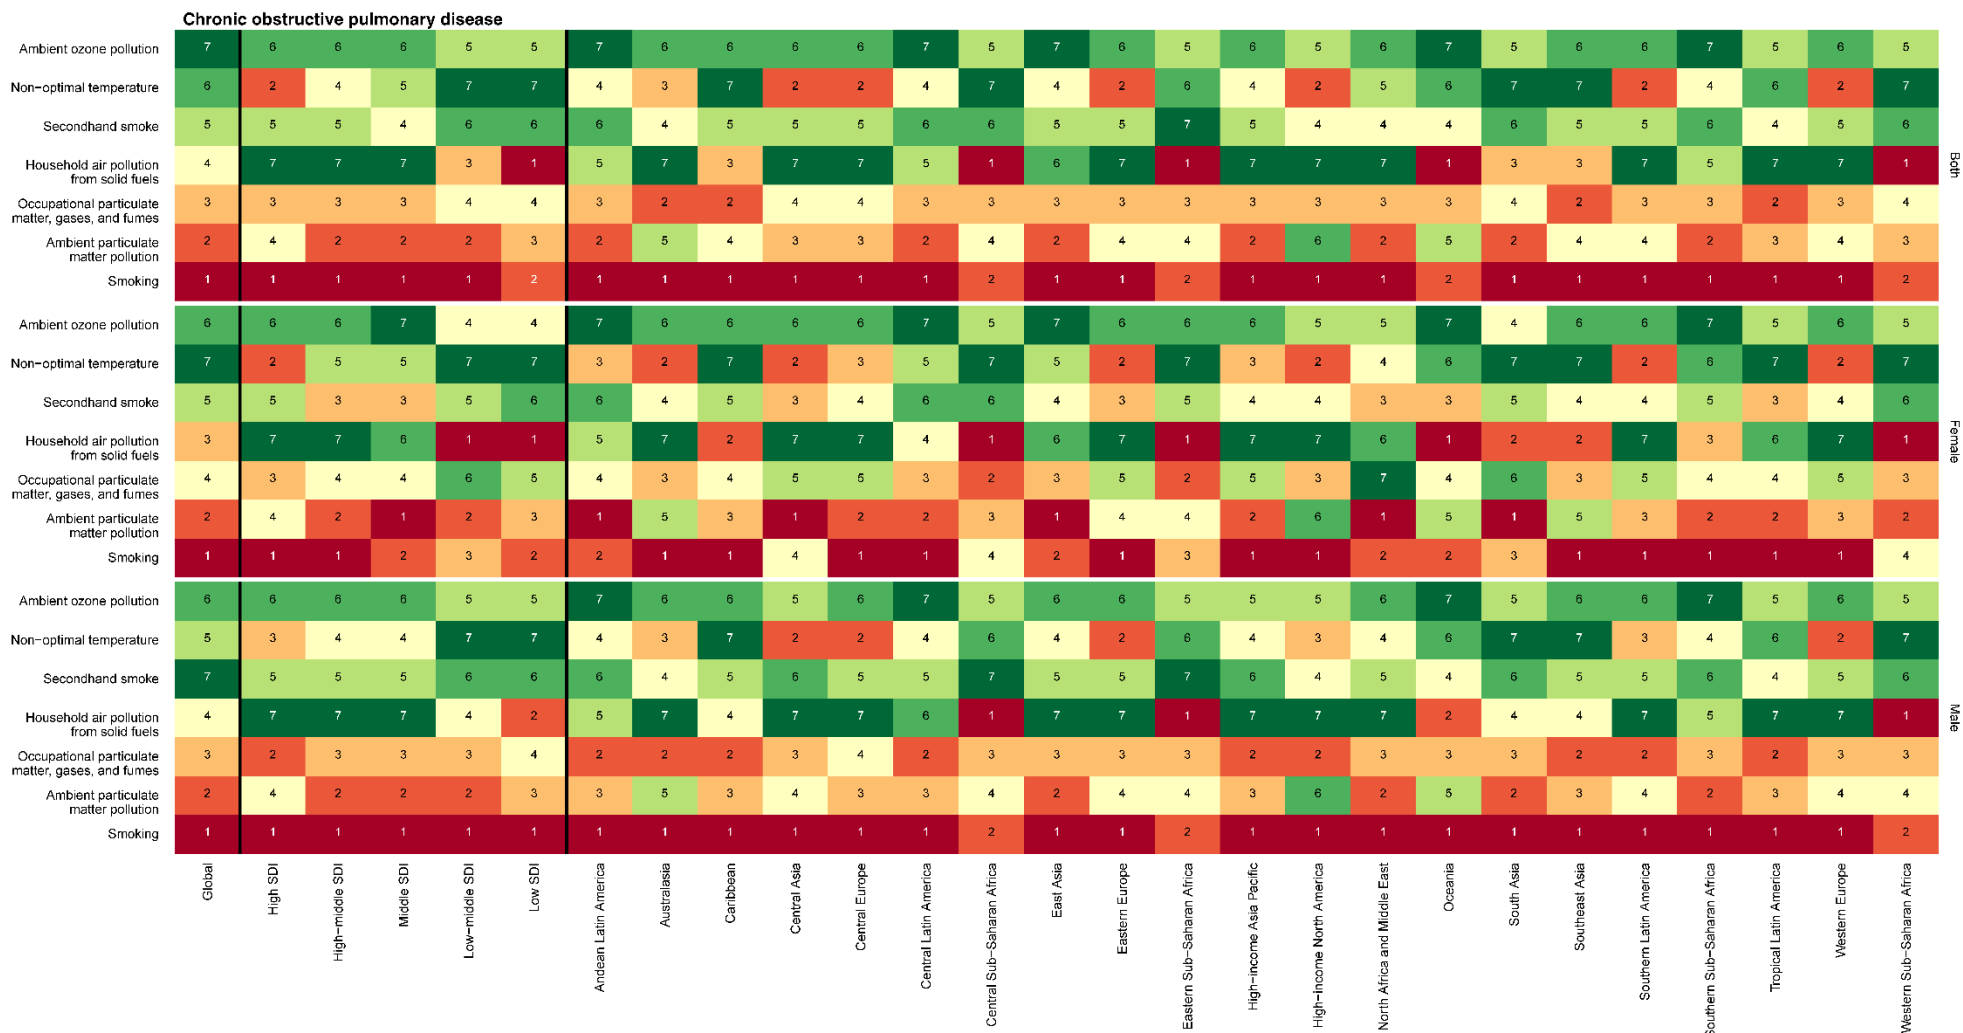

Figure S20. Age-standardised DALYs from COPD attributed to risk factors by sex and region in 1990 and 2019

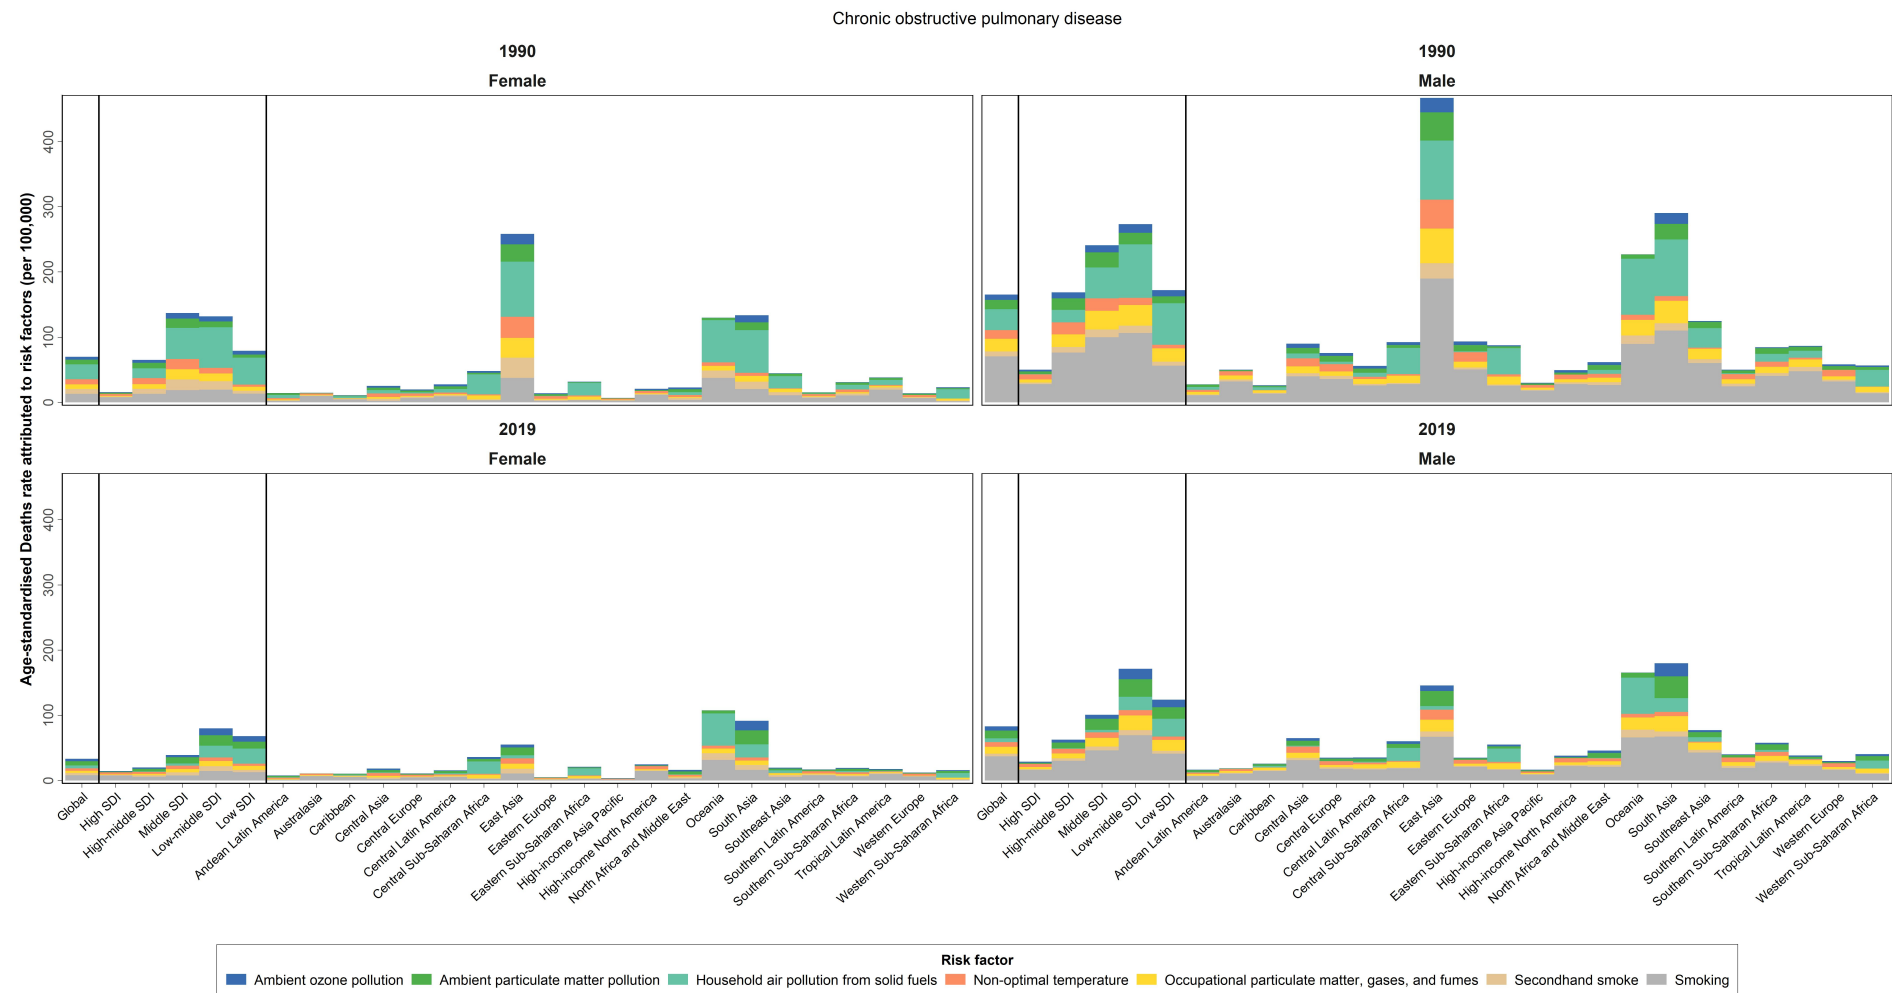

B.3.3 Asthma

Figure S21. Global age-standardised rates of incidence, prevalence, deaths, and DALYs of asthma by sex, 1990-2019

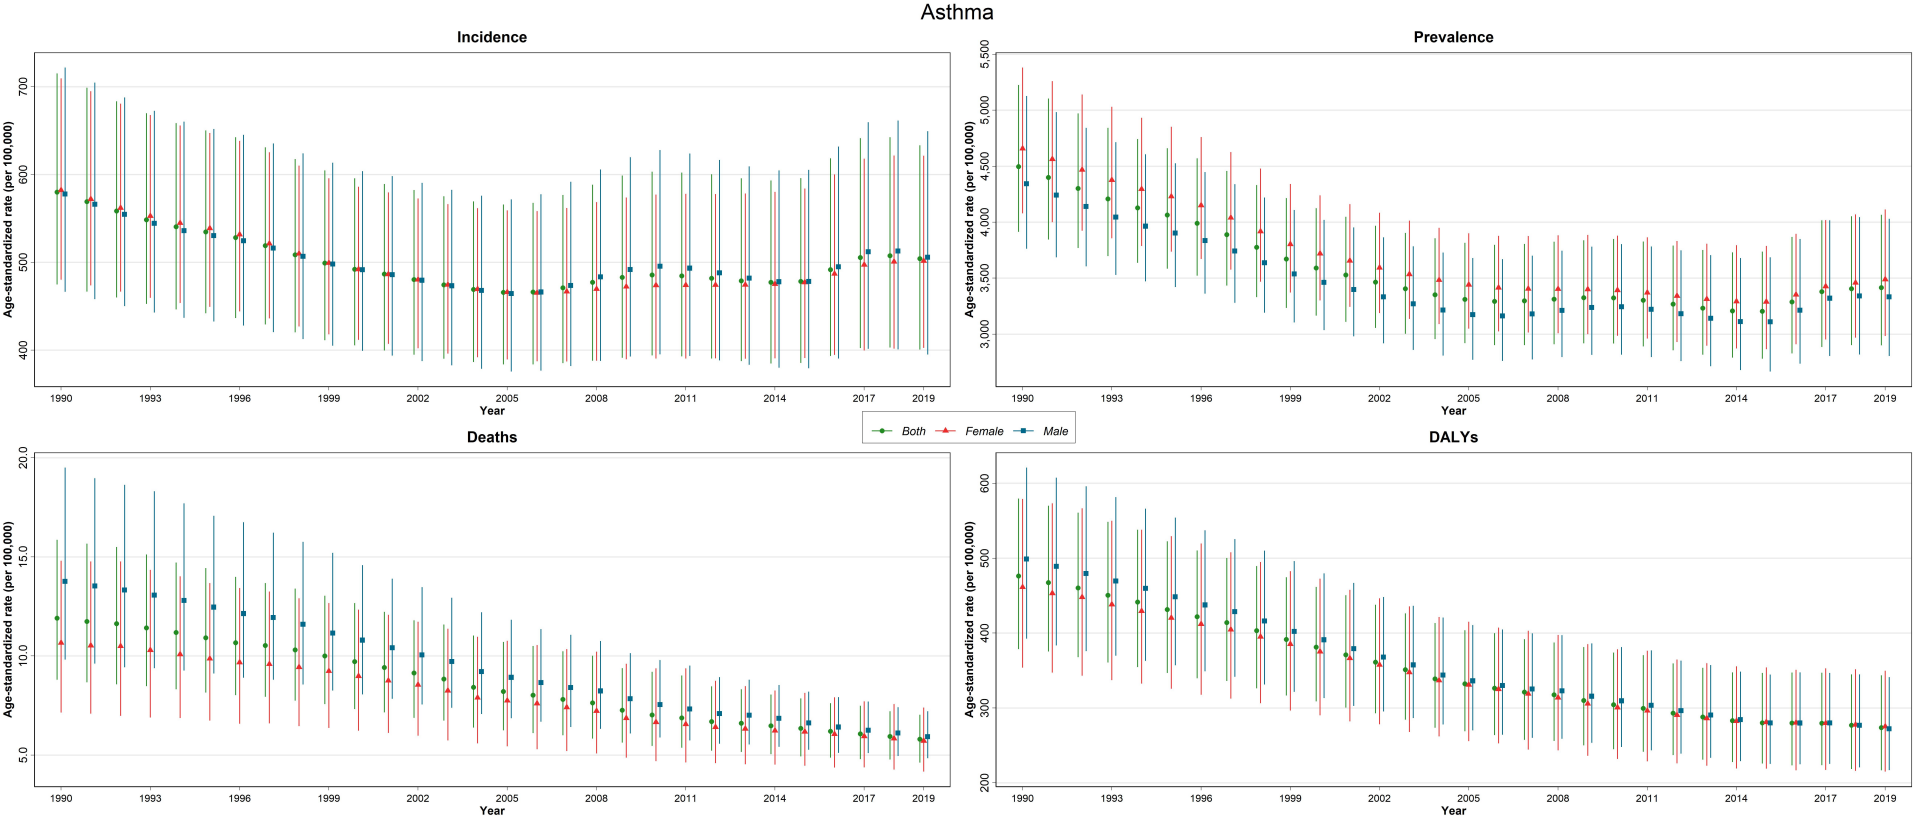

Figure S22. Global age-standardised rates of incidence, prevalence, deaths, and DALYs of asthma by SDI, both sexes, 1990-2019

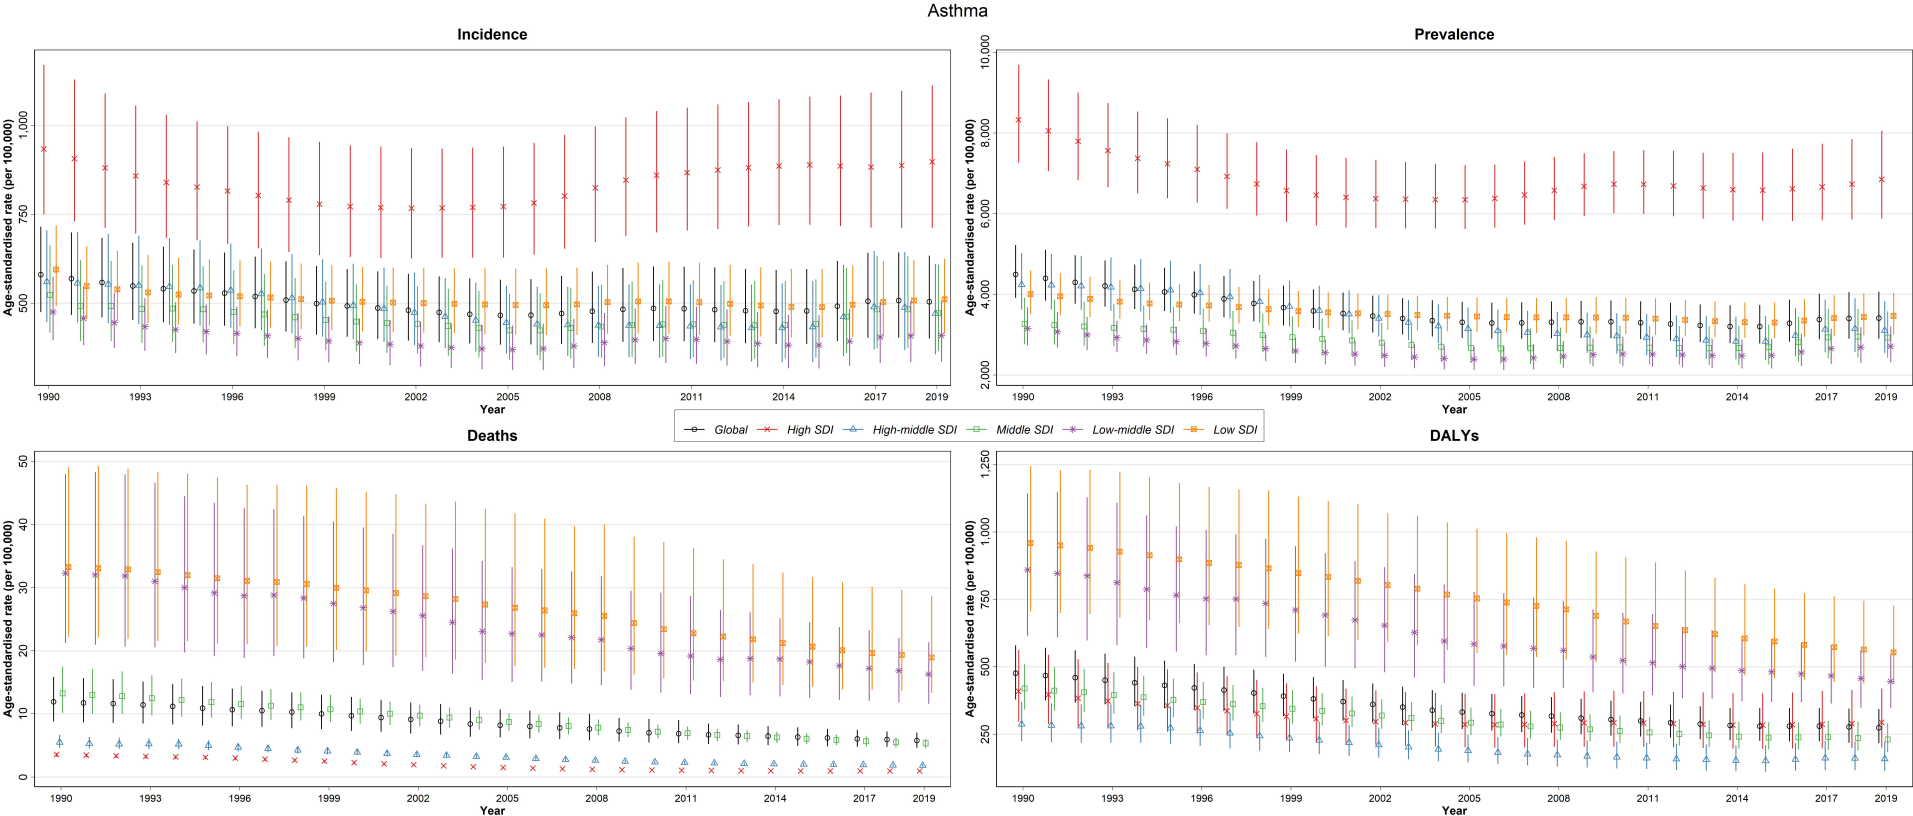

Figure S23. Ranked contribution of risk factors to the age-standardised DALYs from asthma by region, 2019, for both sexes, females, and males

| Asthma                  |        |          |                 |            |                |         |                      |             |           |              |                |                       |                            |           |                |                            |                          |                           |                              |         |            |                |                        |                             |                        |                |                            |        |
|-------------------------|--------|----------|-----------------|------------|----------------|---------|----------------------|-------------|-----------|--------------|----------------|-----------------------|----------------------------|-----------|----------------|----------------------------|--------------------------|---------------------------|------------------------------|---------|------------|----------------|------------------------|-----------------------------|------------------------|----------------|----------------------------|--------|
| Occupational asthmagens | 3      | 3        | 3               | 3          | 3              | 2       | 2                    | 3           | 2         | 3            | 3              | 2                     | 2                          | 3         | 3              | 1                          | 3                        | 3                         | 3                            | 3       | 3          | 3              | 3                      | 3                           | 2                      | 3              | 2                          | Both   |
| Smoking                 | 2      | 2        | 2               | 2          | 2              | 3       | 3                    | 2           | 3         | 2            | 2              | 3                     | 3                          | 2         | 2              | 3                          | 2                        | 2                         | 2                            | 2       | 2          | 2              | 2                      | 2                           | 3                      | 2              | 3                          |        |
| High body-mass index    | 1      | 1        | 1               | 1          | 1              | 1       | 1                    | 1           | 1         | 1            | 1              | 1                     | 1                          | 1         | 1              | 2                          | 1                        | 1                         | 1                            | 1       | 1          | 1              | 1                      | 1                           | 1                      | 1              | 1                          |        |
| Occupational asthmagens | 2      | 3        | 3               | 2          | 2              | 2       | 2                    | 3           | 2         | 2            | 3              | 2                     | 2                          | 2         | 3              | 2                          | 2                        | 3                         | 3                            | 3       | 2          | 2              | 3                      | 2                           | 2                      | 3              | 2                          | Female |
| Smoking                 | 3      | 2        | 2               | 3          | 3              | 3       | 3                    | 2           | 3         | 3            | 2              | 3                     | 3                          | 3         | 2              | 3                          | 3                        | 2                         | 2                            | 2       | 3          | 3              | 2                      | 3                           | 3                      | 2              | 3                          |        |
| High body-mass index    | 1      | 1        | 1               | 1          | 1              | 1       | 1                    | 1           | 1         | 1            | 1              | 1                     | 1                          | 1         | 1              | 1                          | 1                        | 1                         | 1                            | 1       | 1          | 1              | 1                      | 1                           | 1                      | 1              |                            |        |
| Occupational asthmagens | 3      | 3        | 3               | 3          | 2              | 1       | 2                    | 2           | 2         | 3            | 3              | 2                     | 1                          | 3         | 3              | 1                          | 3                        | 3                         | 3                            | 3       | 2          | 3              | 3                      | 3                           | 2                      | 3              | 2                          | Male   |
| Smoking                 | 1      | 2        | 2               | 1          | 1              | 2       | 3                    | 3           | 3         | 2            | 2              | 3                     | 3                          | 1         | 2              | 3                          | 1                        | 2                         | 2                            | 1       | 1          | 1              | 2                      | 2                           | 3                      | 2              | 3                          |        |
| High body-mass index    | 2      | 1        | 1               | 2          | 3              | 3       | 1                    | 1           | 1         | 1            | 1              | 1                     | 2                          | 2         | 1              | 2                          | 2                        | 1                         | 1                            | 2       | 3          | 2              | 1                      | 1                           | 1                      | 1              | 1                          |        |
|                         | Global | High SDI | High-middle SDI | Middle SDI | Low-middle SDI | Low SDI | Andean Latin America | Australasia | Caribbean | Central Asia | Central Europe | Central Latin America | Central Sub-Saharan Africa | East Asia | Eastern Europe | Eastern Sub-Saharan Africa | High-income Asia Pacific | High-income North America | North Africa and Middle East | Oceania | South Asia | Southeast Asia | Southern Latin America | Southern Sub-Saharan Africa | Tropical Latin America | Western Europe | Western Sub-Saharan Africa |        |

Figure S24. Age-standardised DALYs from asthma attributed to risk factors by sex and region in 1990 and 2019

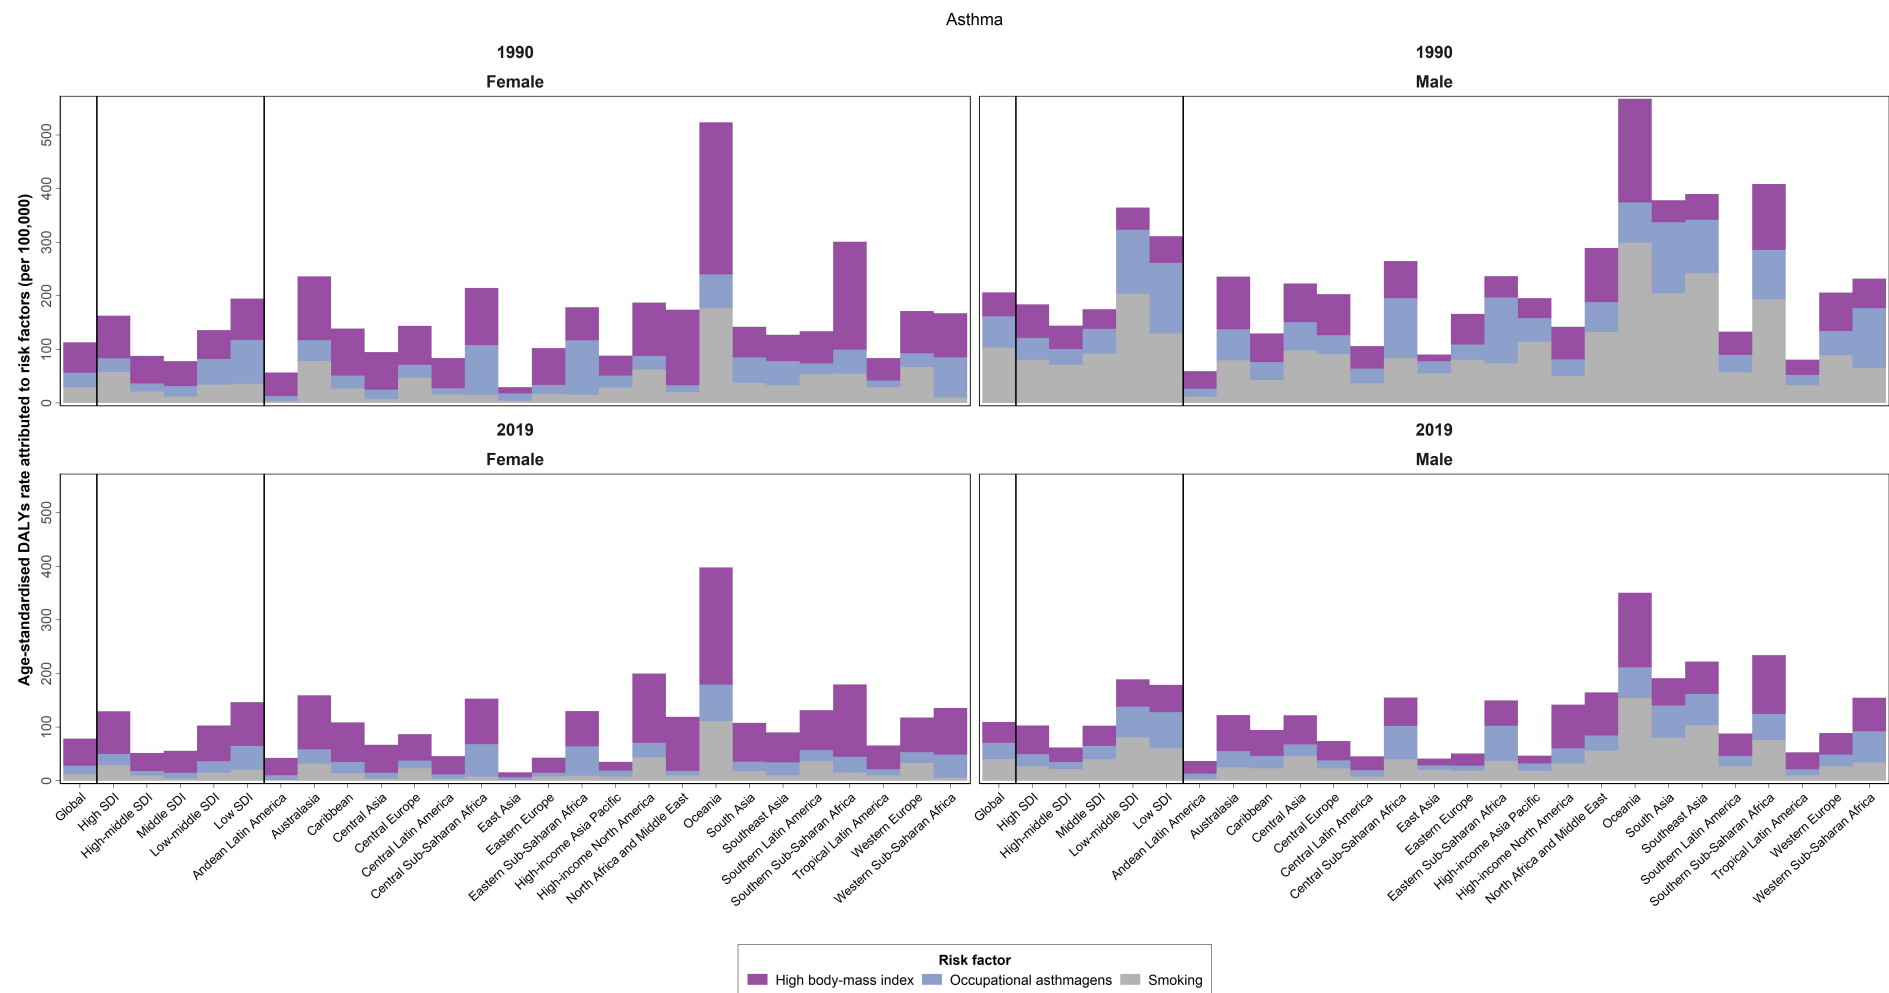

### B.3.4 interstitial lung disease (ILD) and pulmonary sarcoidosis

Figure S25. Global age-standardised rates of incidence, prevalence, deaths, and DALYs of ILD and pulmonary sarcoidosis by sex, 1990-2019

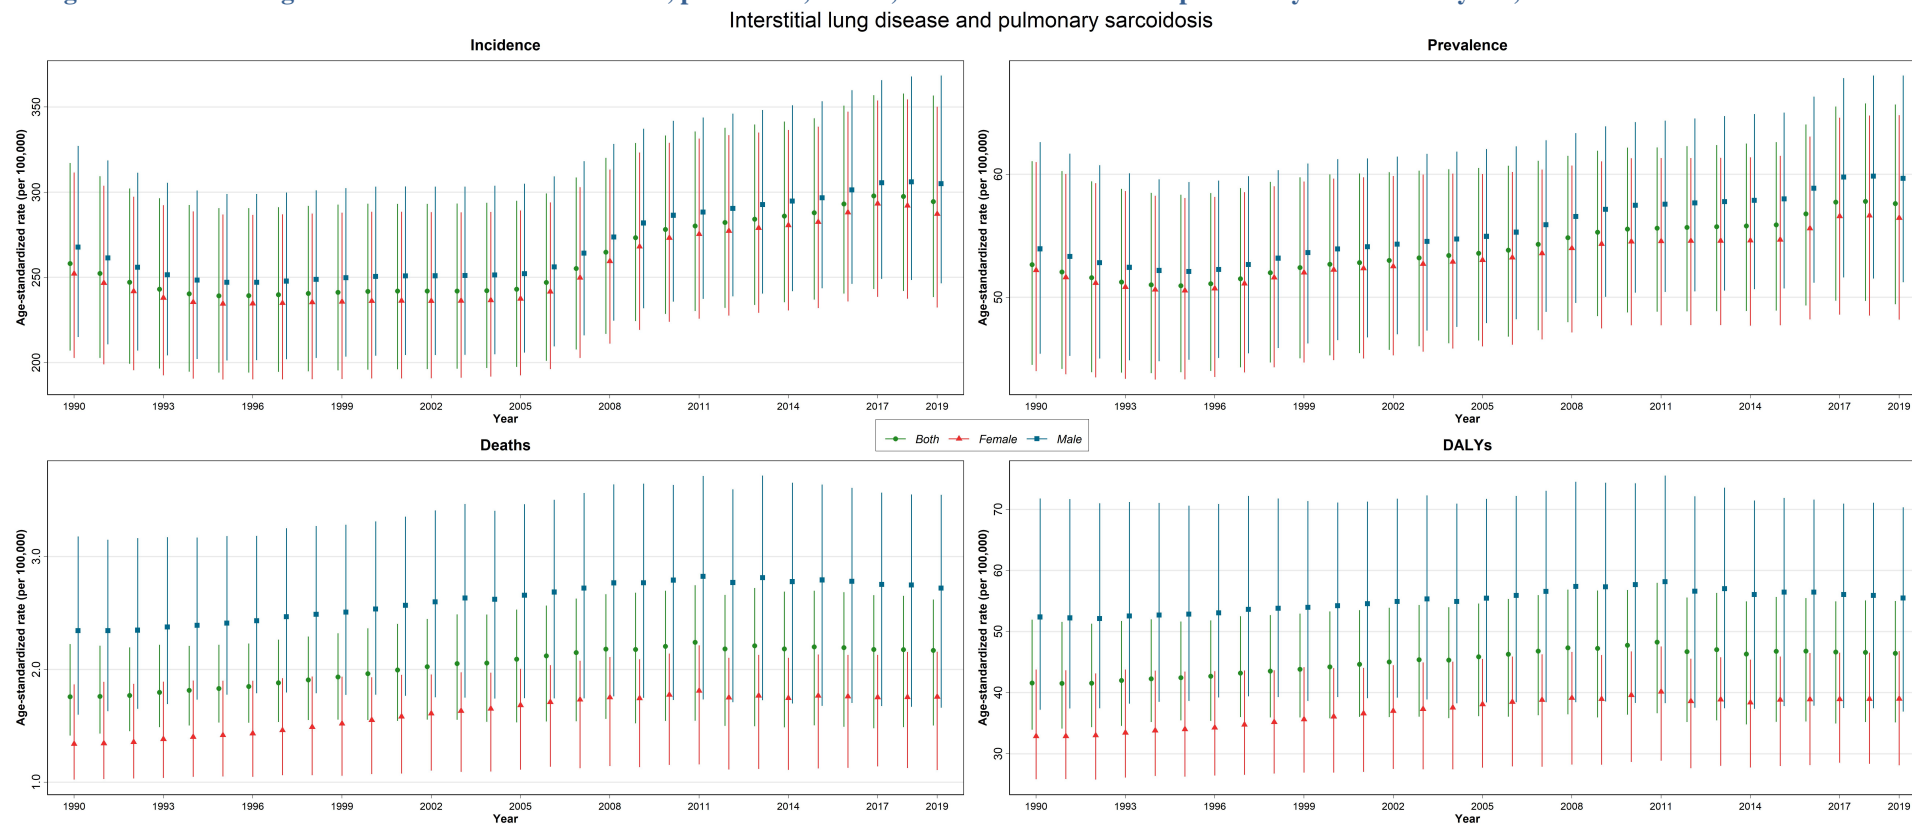

Figure S26. Global age-standardised rates of incidence, prevalence, deaths, and DALYs of ILD and pulmonary sarcoidosis by SDI, both sexes, 1990-2019

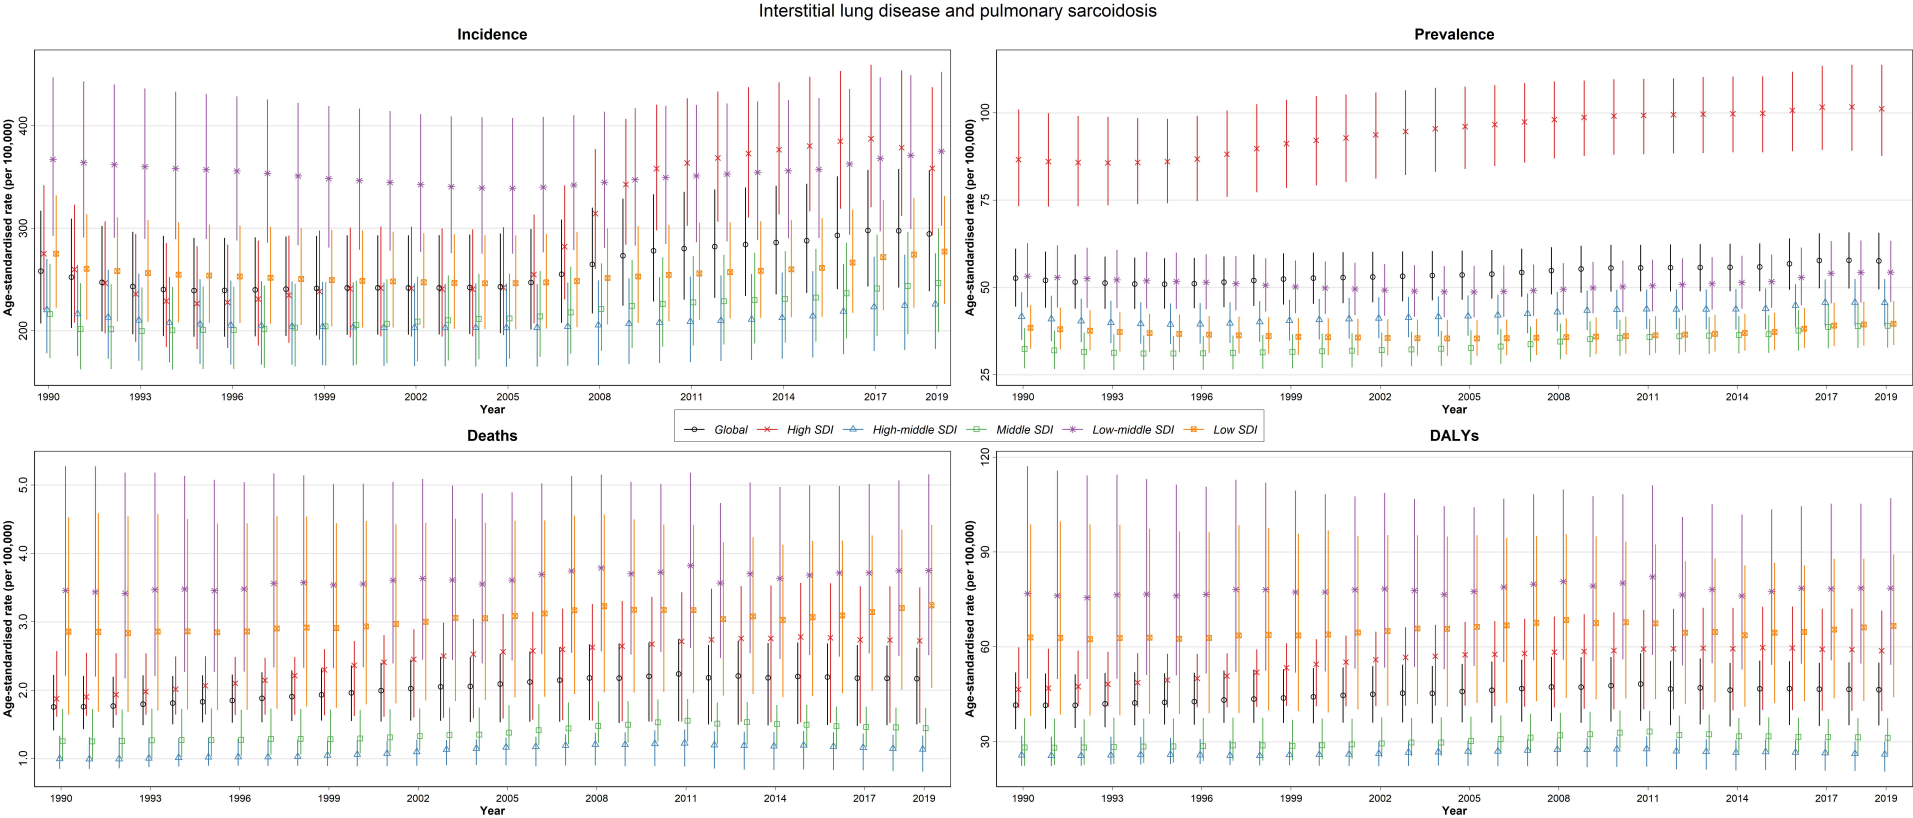

B.3.2 Pneumoconiosis (Coal Worker’s Pneumoconiosis, Asbestosis, Silicosis, and Other Pneumoconiosis)

Figure S27. Global age-standardised rates of incidence, prevalence, deaths, and DALYs of pneumoconiosis by sex, 1990-2019

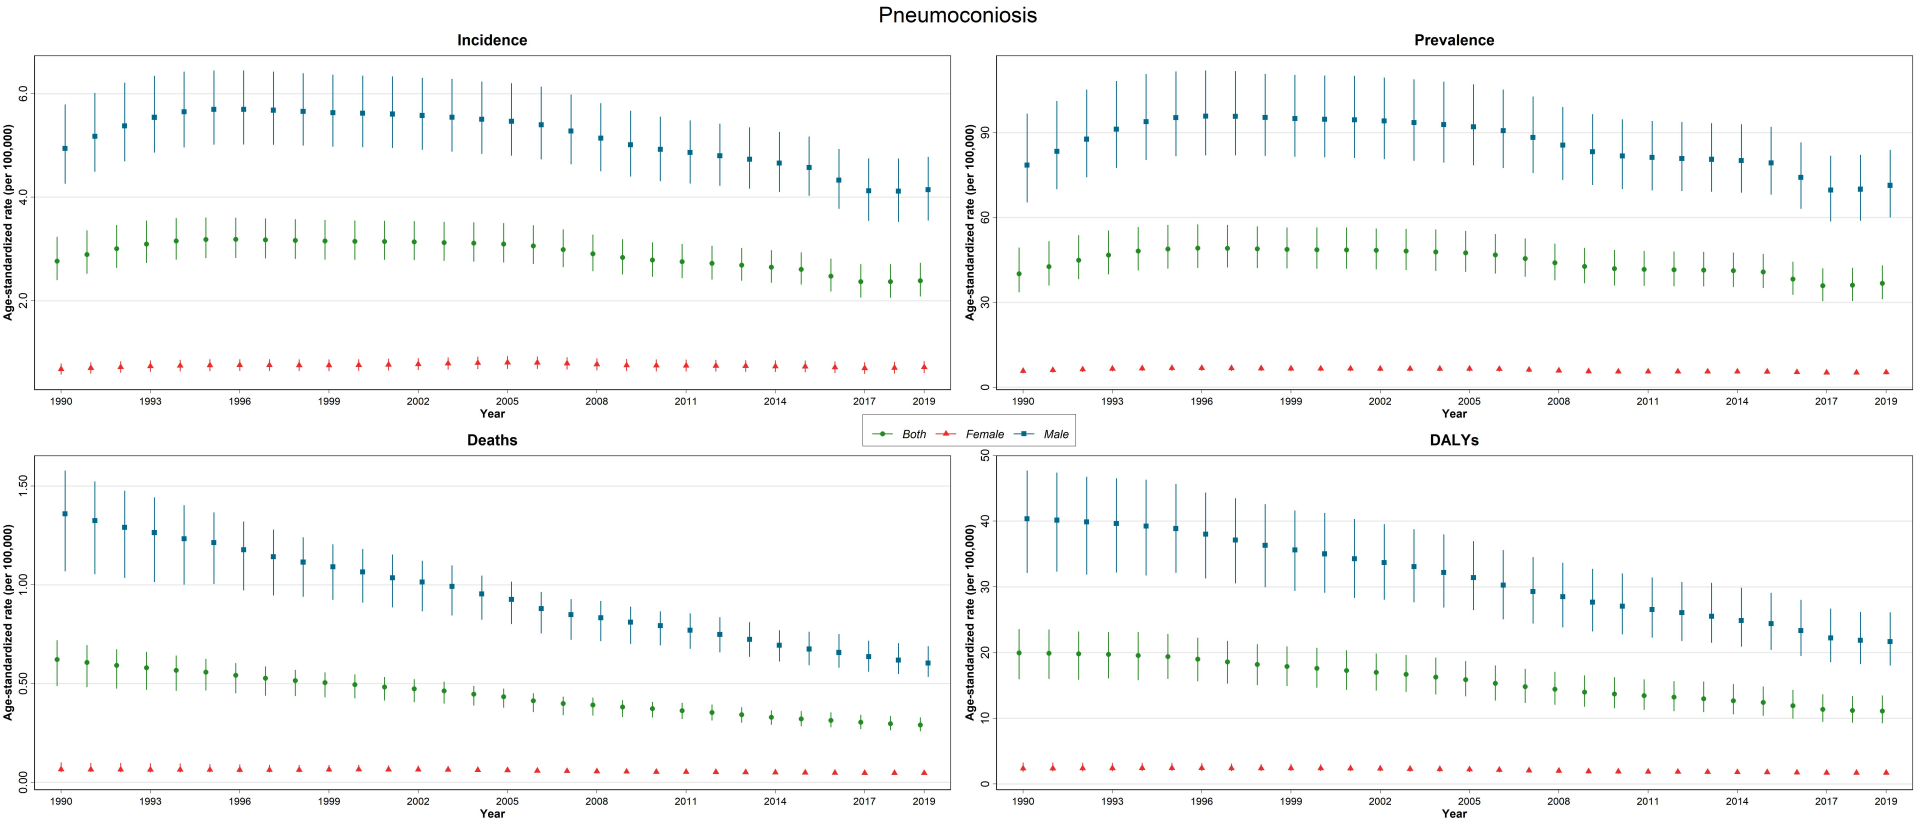

Figure S28. Global age-standardised rates of incidence, prevalence, deaths, and DALYs of pneumoconiosis by SDI, both sexes, 1990-2019

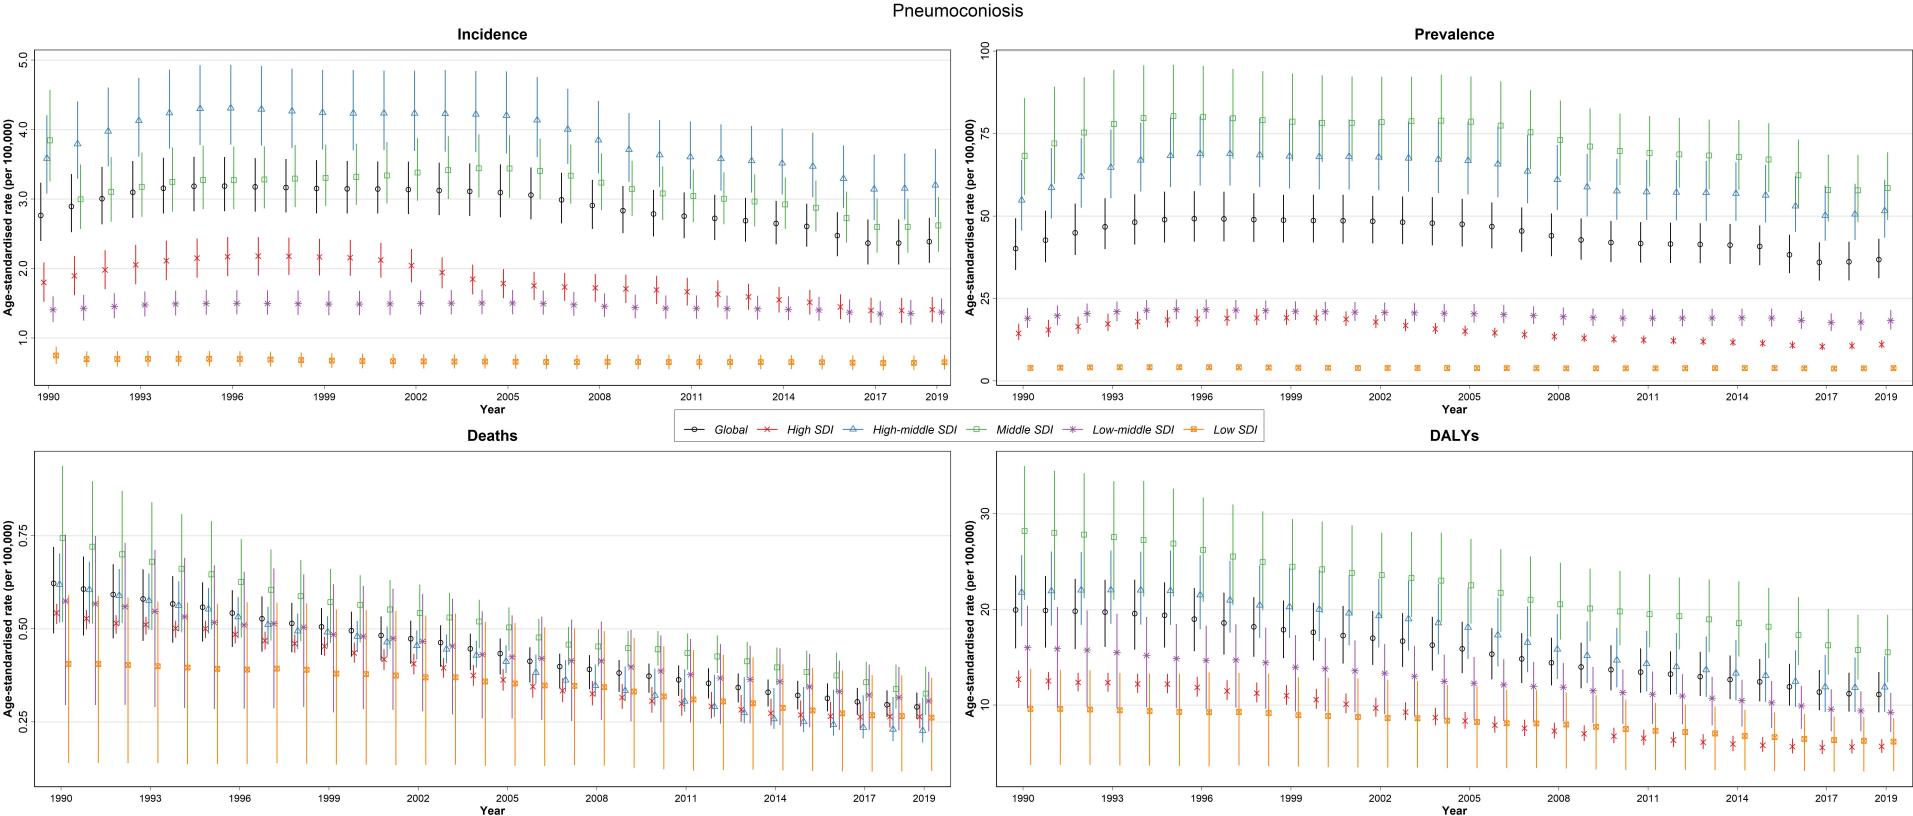

Figure S29. Ranked contribution of risk factors to the age-standardised DALYs from pneumoconiosis by region, 2019, for both sexes, females, and males

| Pneumoconiosis                                    |          |                 |            |                |         |                      |             |           |              |                |                       |                            |           |                |                            |                          |                           |                              |         |            |                |                        |                             |                        |                |                            |      |        |
|---------------------------------------------------|----------|-----------------|------------|----------------|---------|----------------------|-------------|-----------|--------------|----------------|-----------------------|----------------------------|-----------|----------------|----------------------------|--------------------------|---------------------------|------------------------------|---------|------------|----------------|------------------------|-----------------------------|------------------------|----------------|----------------------------|------|--------|
| Occupational exposure to asbestos                 | 3        | 3               | 3          | 3              | 3       | 3                    | 1           | 3         | 2            | 3              | 3                     | 2                          | 3         | 3              | 1                          | 3                        | 1                         | 2                            | 1       | 3          | 3              | 3                      | 1                           | 3                      | 2              | 3                          | Both |        |
| Occupational particulate matter, gases, and fumes | 2        | 2               | 2          | 2              | 2       | 2                    | 1           | 3         | 1            | 1              | 1                     | 2                          | 1         | 2              | 1                          | 2                        | 1                         | 2                            | 1       | 2          | 2              | 2                      | 2                           | 3                      | 2              | 3                          |      | 1      |
| Occupational exposure to silica                   | 1        | 1               | 1          | 1              | 1       | 1                    | 2           | 2         | 2            | 3              | 2                     | 1                          | 3         | 1              | 2                          | 3                        | 2                         | 3                            | 3       | 3          | 1              | 1                      | 1                           | 2                      | 1              | 1                          |      | 2      |
| Occupational exposure to asbestos                 | 3        | 2               | 3          | 3              | 3       | 2                    | 2           | 1         | 2            | 2              | 2                     | 3                          | 2         | 3              | 2                          | 2                        | 3                         | 2                            | 1       | 2          | 3              | 2                      | 3                           | 1                      | 3              | 2                          | 3    | Female |
| Occupational particulate matter, gases, and fumes | 1        | 1               | 2          | 1              | 1       | 1                    | 1           | 2         | 1            | 1              | 1                     | 1                          | 1         | 2              | 1                          | 1                        | 1                         | 1                            | 2       | 1          | 1              | 1                      | 1                           | 2                      | 1              | 3                          | 1    |        |
| Occupational exposure to silica                   | 2        | 3               | 1          | 2              | 2       | 3                    | 3           | 3         | 3            | 3              | 3                     | 2                          | 3         | 1              | 3                          | 3                        | 2                         | 3                            | 3       | 3          | 2              | 3                      | 2                           | 3                      | 2              | 1                          | 2    |        |
| Occupational exposure to asbestos                 | 3        | 3               | 3          | 3              | 3       | 3                    | 3           | 1         | 3            | 3              | 3                     | 3                          | 1         | 3              | 3                          | 1                        | 3                         | 1                            | 3       | 2          | 3              | 3                      | 3                           | 1                      | 3              | 2                          | 3    | Male   |
| Occupational particulate matter, gases, and fumes | 2        | 2               | 2          | 2              | 2       | 2                    | 1           | 3         | 1            | 1              | 1                     | 2                          | 2         | 2              | 1                          | 3                        | 1                         | 2                            | 1       | 3          | 2              | 2                      | 2                           | 3                      | 2              | 3                          | 1    |        |
| Occupational exposure to silica                   | 1        | 1               | 1          | 1              | 1       | 1                    | 2           | 2         | 2            | 2              | 2                     | 1                          | 3         | 1              | 2                          | 2                        | 2                         | 3                            | 2       | 1          | 1              | 1                      | 1                           | 2                      | 1              | 1                          | 2    |        |
| Global                                            | High SDI | High-middle SDI | Middle SDI | Low-middle SDI | Low SDI | Andean Latin America | Australasia | Caribbean | Central Asia | Central Europe | Central Latin America | Central Sub-Saharan Africa | East Asia | Eastern Europe | Eastern Sub-Saharan Africa | High-income Asia Pacific | High-income North America | North Africa and Middle East | Oceania | South Asia | Southeast Asia | Southern Latin America | Southern Sub-Saharan Africa | Tropical Latin America | Western Europe | Western Sub-Saharan Africa |      |        |

Figure S30. Age-standardised DALYs from pneumoconiosis attributed to risk factors by sex and region in 1990 and 2019

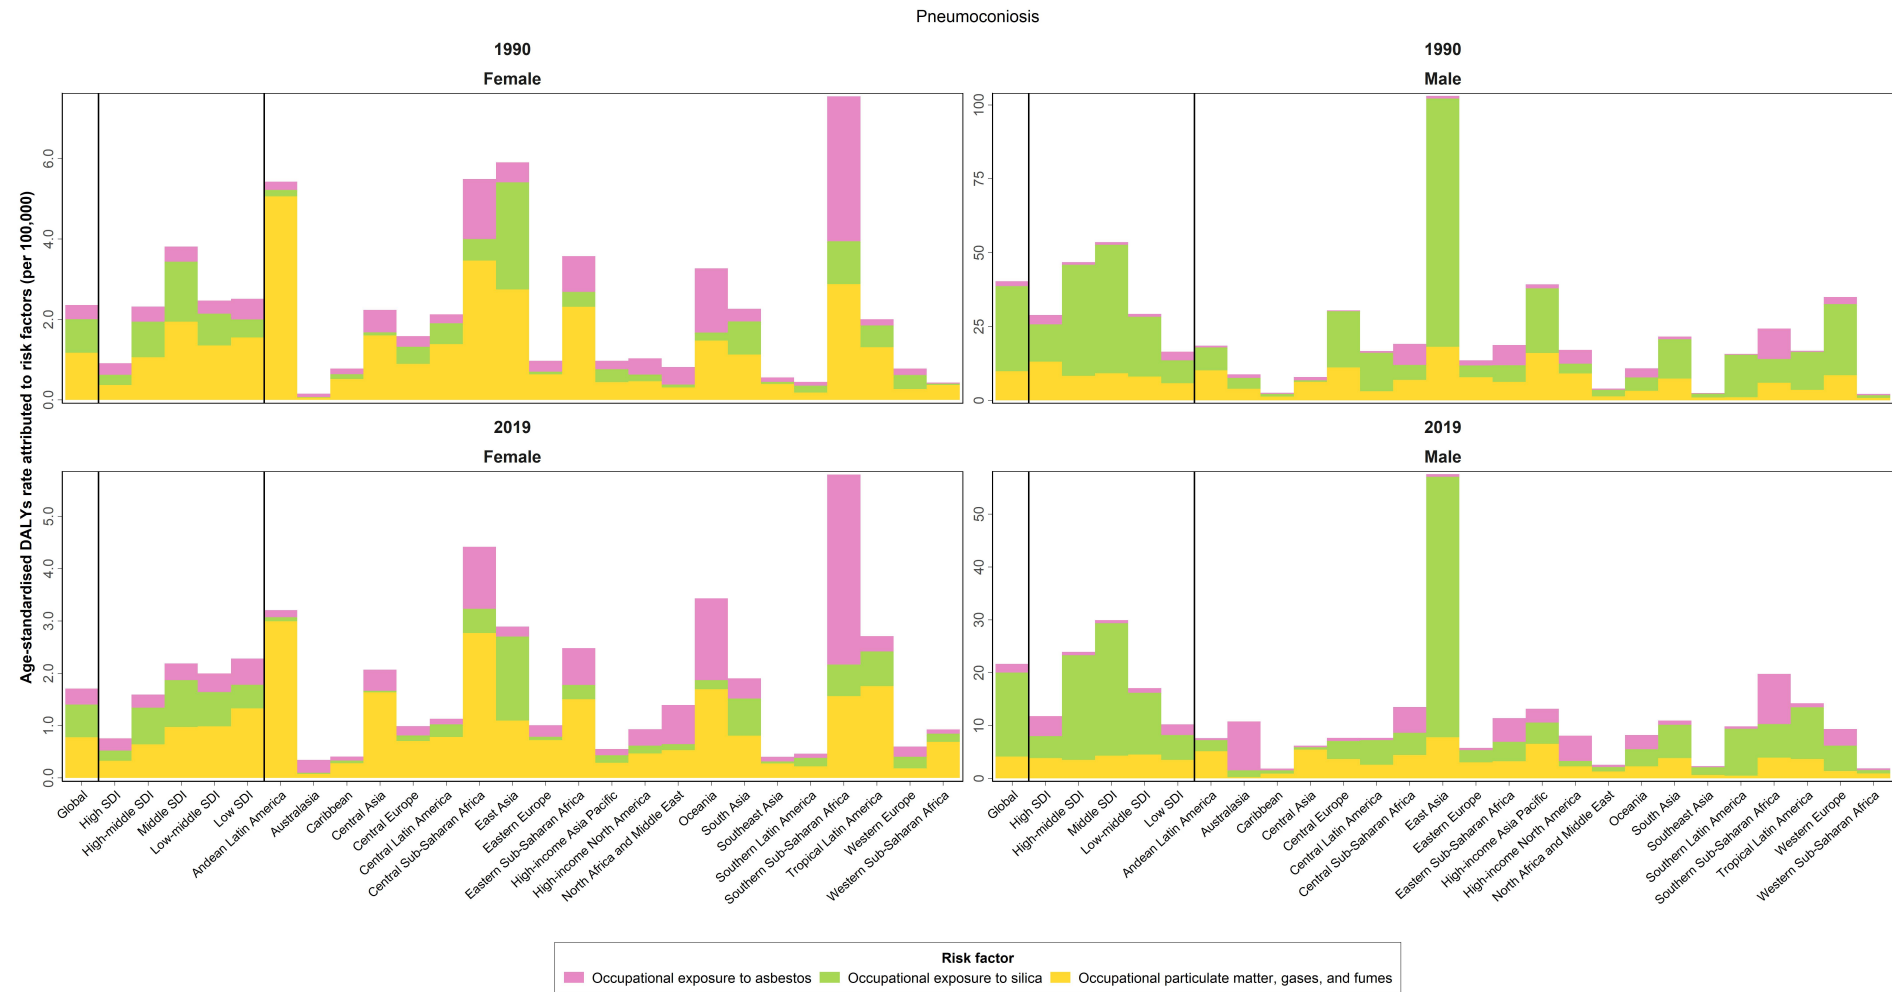

Figure S31. Ranked contribution of the specific sub-causes to the age-standardised DALYs from pneumoconiosis by region, 2019, for both sexes, females, and males

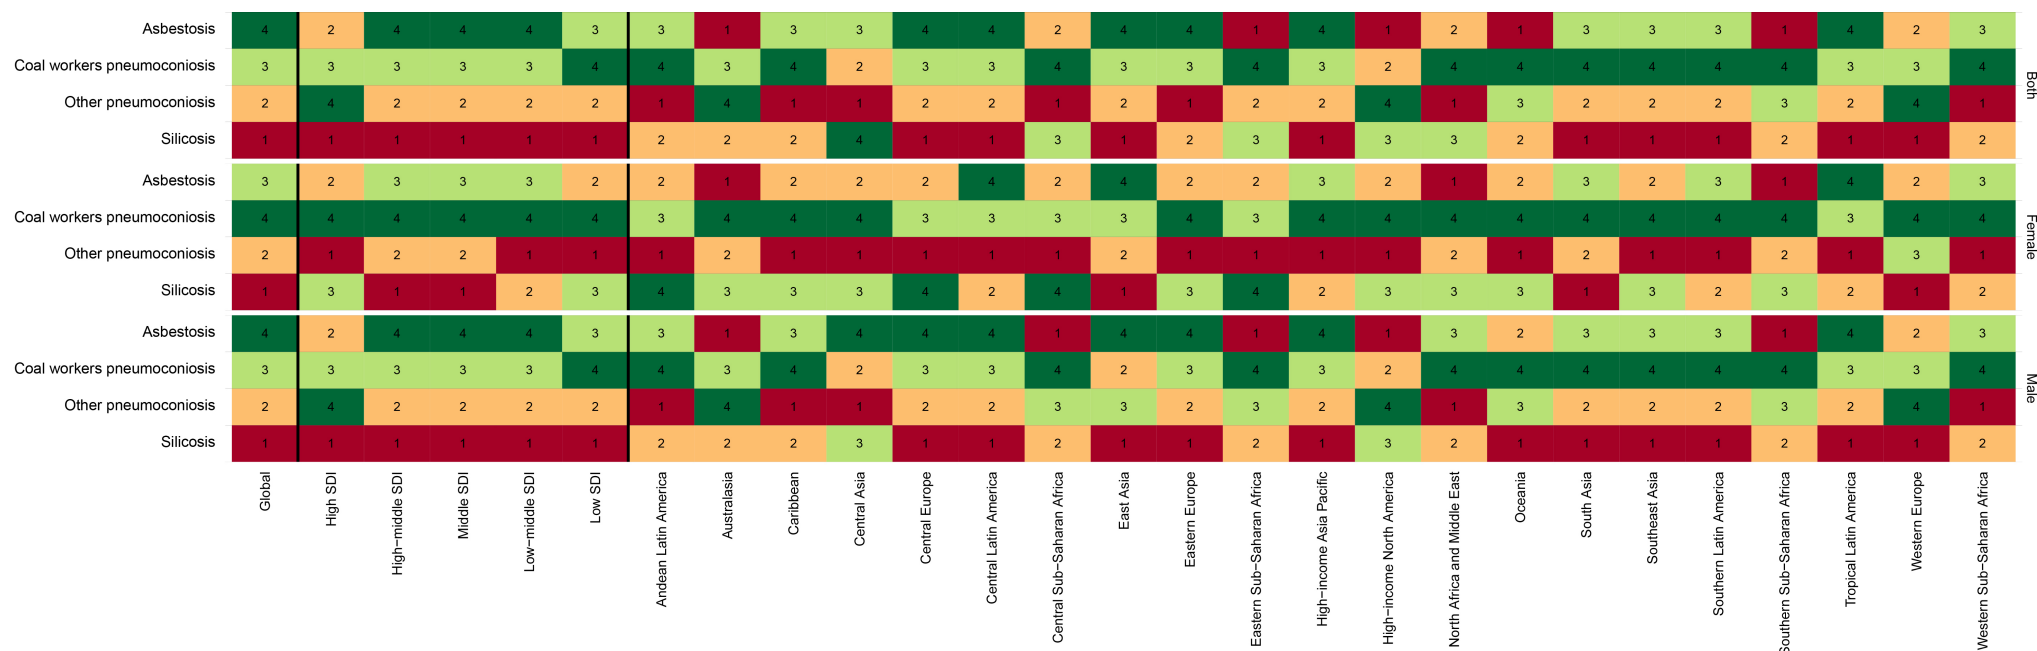

## Tables

**Table S1. Global incidence, prevalence, deaths, DALYs, YLLs, and YLDs from chronic respiratory diseases by sex**

| Measure    | Age (metric)                        | Year      | Sex    | CRD                                      | Cause specific                           |                                    |                                          |                                      |                           |
|------------|-------------------------------------|-----------|--------|------------------------------------------|------------------------------------------|------------------------------------|------------------------------------------|--------------------------------------|---------------------------|
|            |                                     |           |        |                                          | COPD                                     | Pneumoconiosis                     | Asthma                                   | ILD & pulmonary sarcoidosis          | Other                     |
| Incidence  | All ages (number)                   | % Change* | Female | 50.4 (43.6 to 57)                        | 91 (87.7 to 94)                          | 97.1 (89.3 to 106.3)               | 15.5 (12.2 to 18.7)                      | 118.6 (111.2 to 125.7)               |                           |
|            |                                     |           | Male   | 47.7 (40.7 to 54.5)                      | 81.3 (77.3 to 85.3)                      | 56.5 (37.7 to 74.3)                | 14.4 (11.3 to 17.7)                      | 118.6 (108.9 to 128.2)               |                           |
|            |                                     | 2019      | Female | 38,614,376 (34,362,796 to 43,392,020)    | 7,932,302 (7,436,213 to 8,430,721)       | 30,274 (25,464 to 35,152)          | 18,352,088 (14,956,288 to 22,378,285)    | 12,299,713 (9,911,071 to 15,038,089) |                           |
|            |                                     |           | Male   | 39,010,924 (34,421,975 to 44,606,496)    | 8,282,527 (7,778,147 to 8,804,794)       | 168,851 (143,671 to 196,290)       | 18,627,180 (14,694,772 to 23,649,765)    | 11,932,367 (9,628,216 to 14,464,319) |                           |
|            | Age-standardized (rate per 100,000) | % Change  | Female | -5.2 (-7 to -3.6)                        | -4.3 (-5.7 to -2.9)                      | 5.4 (1.1 to 10.2)                  | -13.9 (-16.9 to -11.3)                   | 13.9 (11 to 17)                      |                           |
|            |                                     |           | Male   | -5.7 (-7.7 to -3.9)                      | -11 (-12.6 to -9.4)                      | -16.1 (-24.4 to -8.2)              | -12.5 (-16.3 to -9.3)                    | 13.9 (10.5 to 17.3)                  |                           |
|            |                                     | 2019      | Female | 973.4 (860.6 to 1108.6)                  | 184 (172.7 to 195.3)                     | 0.7 (0.6 to 0.8)                   | 501.6 (402.4 to 621.4)                   | 287.2 (232.3 to 350.1)               |                           |
|            |                                     |           | Male   | 1034.1 (910 to 1187.4)                   | 219.3 (206.6 to 232)                     | 4.1 (3.5 to 4.8)                   | 505.8 (394.9 to 649.4)                   | 304.9 (246.5 to 368.4)               |                           |
| Prevalence | All ages (number)                   | % Change  | Female | 39.6 (35.9 to 42.9)                      | 88.1 (85.2 to 91.2)                      | 83.4 (74 to 93)                    | 15.4 (12.4 to 18.7)                      | 111.8 (104.6 to 119.3)               |                           |
|            |                                     |           | Male   | 39.9 (36.6 to 43.5)                      | 81.4 (78 to 85)                          | 83.9 (60.4 to 104.6)               | 15.9 (12.7 to 19.6)                      | 116.8 (107.9 to 125.9)               |                           |
|            |                                     | 2019      | Female | 231,152,957 (212,559,495 to 252,660,333) | 107,368,252 (101,311,402 to 114,029,088) | 228,490 (197,181 to 262,387)       | 135,641,710 (116,701,201 to 157,898,921) | 2,432,444 (2,074,827 to 2,797,609)   |                           |
|            |                                     |           | Male   | 223,404,433 (203,679,747 to 248,407,883) | 104,967,700 (99,208,838 to 111,045,776)  | 2,844,060 (2,389,878 to 3,356,589) | 126,763,472 (106,760,386 to 152,696,253) | 2,277,737 (1,946,302 to 2,613,887)   |                           |
|            | Age-standardized (rate per 100,000) | % Change  | Female | -17.4 (-19.1 to -15.8)                   | -6.4 (-7.9 to -4.9)                      | -8.4 (-13 to -3.8)                 | -25.1 (-27.8 to -22.4)                   | 8.1 (4.8 to 11.6)                    |                           |
|            |                                     |           | Male   | -16.8 (-18.6 to -14.8)                   | -11.9 (-13.4 to -10.3)                   | -9.1 (-20.2 to 0.1)                | -23.2 (-27 to -19.4)                     | 10.6 (7 to 14.2)                     |                           |
|            |                                     | 2019      | Female | 5695.9 (5209.3 to 6282.1)                | 2487.1 (2346.5 to 2640.6)                | 5.3 (4.6 to 6.1)                   | 3488.5 (2982.6 to 4112.6)                | 56.5 (48.2 to 64.8)                  |                           |
|            |                                     |           | Male   | 5907.7 (5382 to 6581.2)                  | 2828.1 (2677.6 to 2990.5)                | 71.4 (60.1 to 83.9)                | 3332.8 (2804.3 to 4028.8)                | 59.7 (51.2 to 68)                    |                           |
| Deaths     | All ages (number)                   | % Change  | Female | 27.9 (9 to 62.1)                         | 27.8 (7.6 to 67.1)                       | 48.5 (1.6 to 84.7)                 | 8.9 (-12.4 to 32.9)                      | 182.5 (96.3 to 266.2)                | 51.4 (11.2 to 93)         |
|            |                                     |           | Male   | 28.9 (13.1 to 49.9)                      | 32 (13.8 to 54.4)                        | -6.1 (-22.8 to 27.4)               | -8.3 (-23.6 to 13.2)                     | 154.8 (79.2 to 274.5)                | 52.8 (27 to 89.8)         |
|            |                                     | 2019      | Female | 1,740,667 (1,456,918 to 1,961,313)       | 1,399,301 (1,140,438 to 1,602,086)       | 2,043 (1,699 to 2,388)             | 247,395 (179,849 to 320,088)             | 76,869 (48,378 to 94,366)            | 15,059 (10,342 to 18,924) |
|            |                                     |           | Male   | 2,233,647 (2,029,782 to 2,452,532)       | 1,881,335 (1,695,563 to 2,071,025)       | 20,972 (18,482 to 24,033)          | 213,674 (174,060 to 260,238)             | 92,964 (57,581 to 120,738)           | 24,702 (18,384 to 30,308) |
|            | Age-standardized (rate per 100,000) | % Change  | Female | -41.4 (-50.2 to -26.2)                   | -42.4 (-51.4 to -25.4)                   | -29.2 (-50.9 to -12.7)             | -46.4 (-57.2 to -34.2)                   | 31.2 (-10.6 to 70.9)                 | -18.3 (-36.5 to 0.8)      |
|            |                                     |           | Male   | -42.9 (-49.6 to -34.1)                   | -42.3 (-49.8 to -33.4)                   | -55.6 (-63.1 to -40.7)             | -56.9 (-64.9 to -46.5)                   | 16.1 (-20.8 to 73.3)                 | -22.1 (-33.9 to -5.4)     |
|            |                                     | 2019      | Female | 39.7 (33.2 to 44.7)                      | 31.8 (26 to 36.5)                        | 0 (0 to 0.1)                       | 5.7 (4.2 to 7.4)                         | 1.8 (1.1 to 2.2)                     | 0.4 (0.2 to 0.5)          |
|            |                                     |           | Male   | 66.7 (60.5 to 73.1)                      | 56.8 (51.2 to 62.5)                      | 0.6 (0.5 to 0.7)                   | 5.9 (4.8 to 7.2)                         | 2.7 (1.7 to 3.5)                     | 0.7 (0.5 to 0.8)          |

| Measure | Age (metric)                        | Year     | Sex    | CRD                                   | Cause specific                        |                                |                                      |                                    |                                    |
|---------|-------------------------------------|----------|--------|---------------------------------------|---------------------------------------|--------------------------------|--------------------------------------|------------------------------------|------------------------------------|
|         |                                     |          |        |                                       | COPD                                  | Pneumoconiosis                 | Asthma                               | ILD & pulmonary sarcoidosis        | Other                              |
| DALYs   | All ages (number)                   | % Change | Female | 22.3 (10.3 to 43.8)                   | 27.2 (12.2 to 57.8)                   | 41.3 (5.2 to 65.3)             | -0.1 (-10 to 11.1)                   | 135.8 (88 to 183)                  | 81.5 (39.9 to 115.7)               |
|         |                                     |          | Male   | 19.6 (8.1 to 35)                      | 24.5 (9.8 to 43.1)                    | 9.2 (-9.1 to 37.5)             | -6.7 (-16.7 to 4.8)                  | 113.4 (61.7 to 188.1)              | 72.7 (45.8 to 103.4)               |
|         |                                     | 2019     | Female | 46,526,316 (41,119,608 to 51,370,913) | 32,376,326 (28,369,785 to 35,792,806) | 73,727 (61,638 to 90,232)      | 11,116,325 (8,674,558 to 14,075,192) | 1,685,476 (1,210,211 to 2,023,720) | 1,274,462 (1,074,509 to 1,475,285) |
|         |                                     |          | Male   | 57,006,791 (51,895,441 to 62,641,862) | 42,056,041 (38,371,483 to 46,150,422) | 845,350 (699,045 to 1,027,815) | 10,434,651 (8,318,876 to 13,050,199) | 2,085,418 (1,399,512 to 2,652,671) | 1,585,331 (1,316,177 to 1,838,523) |
|         | Age-standardized (rate per 100,000) | % Change | Female | -36.7 (-42.7 to -25.2)                | -38.1 (-45.4 to -23.4)                | -27.5 (-45.8 to -15.8)         | -40.3 (-47.6 to -32.5)               | 18.7 (-6.2 to 42.9)                | 21.3 (-3.9 to 43.7)                |
|         |                                     |          | Male   | -40.9 (-46.5 to -33.1)                | -41.7 (-48.4 to -33.5)                | -46.3 (-55 to -32.7)           | -45.4 (-53 to -37.3)                 | 5.9 (-20.2 to 44.7)                | 7.6 (-7.8 to 26.1)                 |
|         |                                     | 2019     | Female | 1093 (965.7 to 1209)                  | 744.1 (652.2 to 822.2)                | 1.7 (1.4 to 2.1)               | 275.2 (214.9 to 349.6)               | 39 (28.1 to 46.8)                  | 33 (27.7 to 38.3)                  |
|         |                                     |          | Male   | 1538.7 (1399.5 to 1690.3)             | 1149.1 (1050.1 to 1257.3)             | 21.7 (18 to 26.1)              | 272.2 (216.9 to 340.9)               | 55.5 (36.9 to 70.3)                | 40.2 (33.5 to 46.7)                |
| YLLs    | All ages (number)                   | % Change | Female | 7.8 (-7 to 35.9)                      | 9.5 (-7.9 to 45.6)                    | 17.3 (-23.4 to 50.3)           | -10.7 (-24.4 to 7.7)                 | 141.3 (84.6 to 199.8)              | 25 (-15.4 to 67.6)                 |
|         |                                     |          | Male   | 9.5 (-4 to 28.3)                      | 13.6 (-2.6 to 34.6)                   | -20.4 (-36.4 to 11.6)          | -20.7 (-31.7 to -4.2)                | 113.5 (55.4 to 202.2)              | 36.4 (9.3 to 72.5)                 |
|         |                                     | 2019     | Female | 29,719,823 (25,218,341 to 33,436,073) | 21,829,500 (17,883,748 to 25,012,243) | 39,419 (33,641 to 46,551)      | 5,884,271 (4,436,722 to 7,428,704)   | 1,439,099 (975,532 to 1,768,150)   | 527,534 (358,505 to 682,703)       |
|         |                                     |          | Male   | 41,425,922 (37,667,187 to 45,724,348) | 32,765,398 (29,363,526 to 36,286,001) | 439,920 (380,203 to 510,167)   | 5,470,441 (4,542,805 to 6,512,589)   | 1,851,957 (1,196,509 to 2,398,341) | 898,205 (667,119 to 1,118,633)     |
|         | Age-standardized (rate per 100,000) | % Change | Female | -46.2 (-53.7 to -32.2)                | -47.4 (-55.7 to -30.3)                | -38.9 (-59.9 to -22.4)         | -50.3 (-58.4 to -40)                 | 21 (-8.2 to 50.7)                  | -18.8 (-41.7 to 7.2)               |
|         |                                     |          | Male   | -47.3 (-53.8 to -38.6)                | -47.1 (-54.5 to -37.8)                | -60.4 (-67.9 to -45.3)         | -57.1 (-63.7 to -47.3)               | 5.5 (-23.3 to 50.8)                | -17.7 (-32.1 to 2.4)               |
|         |                                     | 2019     | Female | 686.7 (582.2 to 772.6)                | 499 (409.1 to 571.9)                  | 0.9 (0.8 to 1.1)               | 140.1 (106 to 176.7)                 | 33.3 (22.5 to 40.8)                | 13.5 (9.1 to 17.7)                 |
|         |                                     |          | Male   | 1127.5 (1027.5 to 1242.9)             | 902.2 (808.8 to 995.9)                | 11.5 (10 to 13.4)              | 141.7 (118.2 to 168.4)               | 49.4 (31.5 to 63.9)                | 22.7 (17 to 28.2)                  |
| YLDs    | All ages (number)                   | % Change | Female | 60.3 (52.2 to 68.8)                   | 91 (86.7 to 95.3)                     | 84.5 (73.8 to 95.6)            | 15.1 (12.2 to 18.3)                  | 108 (100.8 to 116.3)               | 166.7 (157.5 to 174.9)             |
|         |                                     |          | Male   | 58.5 (51.1 to 66.3)                   | 87.6 (83.4 to 91.9)                   | 82.8 (59.7 to 103.5)           | 15.8 (12.7 to 19.4)                  | 113 (104.2 to 122.9)               | 164.8 (156.1 to 172.7)             |
|         |                                     | 2019     | Female | 16,806,492 (13,564,765 to 19,824,392) | 10,546,826 (8,827,741 to 12,059,136)  | 34,308 (22,825 to 48,815)      | 5,232,055 (3,425,942 to 7,720,695)   | 246,376 (165,827 to 353,999)       | 746,927 (607,798 to 866,677)       |
|         |                                     |          | Male   | 15,580,870 (12,436,298 to 18,947,340) | 9,290,643 (7,672,101 to 10,654,092)   | 405,429 (267,079 to 578,276)   | 4,964,210 (3,218,615 to 7,311,370)   | 233,462 (155,401 to 338,218)       | 687,126 (561,398 to 799,143)       |
|         | Age-standardized (rate per 100,000) | % Change | Female | -9.5 (-12.1 to -6.8)                  | -3.2 (-5.2 to -1.1)                   | -7.5 (-12.9 to -2.1)           | -24.6 (-27.4 to -21.8)               | 6.8 (3.4 to 10.6)                  | 83.7 (76.4 to 89.7)                |
|         |                                     |          | Male   | -11 (-13.1 to -8.9)                   | -7.5 (-9.4 to -5.7)                   | -9.3 (-20 to 0.5)              | -22.5 (-26.3 to -18.7)               | 9.3 (5.7 to 13.1)                  | 78.6 (71.8 to 84.8)                |
|         |                                     | 2019     | Female | 406.3 (326.2 to 484.4)                | 245.2 (205.4 to 280.3)                | 0.8 (0.5 to 1.1)               | 135.1 (88.4 to 199.6)                | 5.7 (3.9 to 8.2)                   | 19.5 (15.8 to 22.7)                |
|         |                                     |          | Male   | 411.2 (328.6 to 499.3)                | 246.9 (204 to 282)                    | 10.1 (6.7 to 14.5)             | 130.5 (84.6 to 192.8)                | 6.1 (4.1 to 8.8)                   | 17.5 (14.3 to 20.4)                |

\* % Change (1990 to 2019). Data in parentheses are 95% Uncertainty Intervals (95% UIs)

CRD= Chronic Respiratory Disease, COPD= Chronic Obstructive Pulmonary Disease; ILD= Interstitial Lung Disease; DALYs= Disability-Adjusted Life Years; YLLs= Years of Life Lost; YLDs= Years Lived with Disability

**Table S2. Rate of incidence, prevalence, deaths, DALYs, YLLs, and YLDs from chronic respiratory diseases by SDI, by sex and for both sexes combined**

| SDI      | Measure    | Year      | Sex    | CRD                        | Cause specific            |                        |                           |                             |                     |
|----------|------------|-----------|--------|----------------------------|---------------------------|------------------------|---------------------------|-----------------------------|---------------------|
|          |            |           |        |                            | COPD                      | Pneumoconiosis         | Asthma                    | ILD & pulmonary sarcoidosis | Other               |
| High SDI | Incidence  | % Change* | Both   | 3.4 (0.2 to 6.9)           | 0.9 (-0.6 to 2.7)         | -21.8 (-28.3 to -15.4) | -3.9 (-8 to 0.6)          | 30.3 (23.5 to 36.9)         |                     |
|          |            |           | Female | 5.9 (2.4 to 9.9)           | 11.9 (9 to 15.3)          | -34 (-43.6 to -22.5)   | -1.7 (-6 to 3.2)          | 30 (22.7 to 36.6)           |                     |
|          |            |           | Male   | 0.4 (-3.4 to 4.5)          | -10.2 (-11.5 to -8.8)     | -23.4 (-30.1 to -17.1) | -6 (-11.8 to 0.1)         | 29.4 (23.1 to 36.4)         |                     |
|          |            | 2019      | Both   | 1460.9 (1263.9 to 1686.9)  | 203.7 (194.5 to 212.2)    | 1.4 (1.2 to 1.6)       | 897.4 (711.3 to 1111.7)   | 358.5 (293.1 to 437.6)      |                     |
|          |            |           | Female | 1474.6 (1288.7 to 1693.5)  | 184.7 (176.4 to 192.7)    | 0.4 (0.3 to 0.4)       | 945.5 (760.8 to 1157.5)   | 344.1 (280.7 to 418.2)      |                     |
|          |            |           | Male   | 1457.2 (1254.8 to 1692.8)  | 226 (215.8 to 235.3)      | 2.6 (2.3 to 2.9)       | 849.8 (660 to 1079.9)     | 378.7 (306.2 to 460.1)      |                     |
|          | Prevalence | % Change  | Both   | -12.8 (-15 to -10.4)       | -4.4 (-5.8 to -2.8)       | -23.6 (-34.2 to -15.7) | -17.7 (-20.9 to -14.2)    | 16.8 (11.1 to 22.3)         |                     |
|          |            |           | Female | -9.3 (-11.4 to -7)         | 3 (0.7 to 5.7)            | -20.8 (-28.3 to -13)   | -14.1 (-17.1 to -11)      | 15 (9.6 to 21)              |                     |
|          |            |           | Male   | -17 (-19.7 to -14.1)       | -13.7 (-15 to -12.4)      | -30 (-39.8 to -22.2)   | -21.7 (-26 to -17.2)      | 17.3 (11.5 to 22.7)         |                     |
|          |            | 2019      | Both   | 9110.3 (8211.2 to 10240.4) | 2792 (2672.1 to 2914.8)   | 11 (9.9 to 12.3)       | 6855.1 (5876.7 to 8058.5) | 101.2 (87.7 to 113.8)       |                     |
|          |            |           | Female | 9591.8 (8617.9 to 10704.2) | 2612.4 (2499 to 2730.3)   | 1.8 (1.5 to 2)         | 7566.6 (6559 to 8769.9)   | 96.9 (83.9 to 109.5)        |                     |
|          |            |           | Male   | 8683.7 (7822.2 to 9818.8)  | 3031.5 (2900.7 to 3160.1) | 21.9 (19.6 to 24.6)    | 6143.6 (5194.8 to 7371)   | 107.9 (93 to 121.9)         |                     |
|          | Deaths     | % Change  | Both   | -18.7 (-28 to -14.8)       | -15.1 (-22.2 to -8.1)     | -51.3 (-56.3 to -44.8) | -73 (-75.4 to -69.9)      | 45.1 (-26.5 to 99.2)        | 1.5 (-20.8 to 10.7) |
|          |            |           | Female | -3.8 (-26.7 to 3.9)        | 5.5 (-21 to 16.8)         | -5.2 (-19.4 to 10.6)   | -68.2 (-71.5 to -64.2)    | 36.7 (-26.4 to 85.4)        | -7 (-38.4 to 6.4)   |
|          |            |           | Male   | -32.6 (-35.5 to -30.1)     | -32.2 (-36.8 to -26.2)    | -55.6 (-60.1 to -49.3) | -78.7 (-80.8 to -75.9)    | 44.8 (-29.3 to 104.1)       | 6.9 (-7.6 to 17.6)  |
|          |            | 2019      | Both   | 24.6 (21.5 to 26.1)        | 20.4 (18 to 22.2)         | 0.3 (0.2 to 0.3)       | 1 (0.9 to 1.1)            | 2.7 (1.5 to 3.5)            | 0.3 (0.2 to 0.4)    |
|          |            |           | Female | 19.3 (14.5 to 20.9)        | 16.1 (12.2 to 17.8)       | 0 (0 to 0)             | 1 (0.8 to 1.1)            | 2 (1 to 2.5)                | 0.2 (0.1 to 0.3)    |
|          |            |           | Male   | 32.3 (29.7 to 34)          | 26.7 (23.9 to 29.3)       | 0.6 (0.5 to 0.7)       | 0.9 (0.8 to 1)            | 3.8 (1.8 to 5)              | 0.4 (0.3 to 0.5)    |
|          | DALYs      | % Change  | Both   | -16.7 (-20.7 to -14.6)     | -12.7 (-16.6 to -8.9)     | -55.3 (-59.4 to -50)   | -28.2 (-33.6 to -24.1)    | 26.3 (-18.1 to 57.1)        | 25.9 (14.6 to 32.7) |
|          |            |           | Female | -7.4 (-15.5 to -4.2)       | 3.4 (-10.9 to 9.1)        | -17.3 (-25 to -7.4)    | -23.2 (-27.9 to -19.4)    | 21.2 (-12.7 to 46.3)        | 28 (7.2 to 38)      |
|          |            |           | Male   | -27 (-28.9 to -25.1)       | -27.4 (-30.6 to -23.4)    | -59.3 (-63.1 to -54.3) | -34.1 (-40.1 to -29)      | 26.7 (-25.7 to 63.3)        | 23.2 (15.9 to 30.4) |
|          |            | 2019      | Both   | 924.1 (797.2 to 1067)      | 543.5 (499.2 to 582.9)    | 5.7 (5 to 6.4)         | 293.7 (200.7 to 419.4)    | 58.8 (39.6 to 71.5)         | 22.4 (19.4 to 25)   |
|          |            |           | Female | 854.2 (713.5 to 1009.5)    | 467.9 (396.9 to 507)      | 0.8 (0.6 to 0.9)       | 318.8 (216.9 to 457.6)    | 46.3 (31.1 to 55.3)         | 20.4 (16.9 to 23.5) |
|          |            |           | Male   | 1021.8 (901.4 to 1163.9)   | 642.8 (591.9 to 696.6)    | 11.8 (10.4 to 13.3)    | 268.4 (183.1 to 384.5)    | 74.4 (43.9 to 92.1)         | 24.5 (21.4 to 27.4) |
|          | YLLs       | % Change  | Both   | -23.8 (-30.7 to -20.6)     | -18.3 (-23.8 to -12.6)    | -61.6 (-65.5 to -55.6) | -70.1 (-72.5 to -66.8)    | 29.1 (-24.5 to 67.1)        | -4.4 (-18.1 to 3.1) |
|          |            |           | Female | -9.6 (-27.8 to -3.4)       | 3.2 (-20.5 to 12.7)       | -15.2 (-26.5 to -0.3)  | -66.3 (-69.7 to -61.7)    | 23.7 (-18.8 to 55.3)        | -11 (-34.7 to 0.4)  |
|          |            |           | Male   | -35.8 (-38 to -33.5)       | -34.2 (-38.4 to -28.8)    | -64.8 (-68.3 to -59)   | -74.2 (-76.6 to -70.9)    | 28.9 (-31.1 to 72.7)        | -0.4 (-8.2 to 8.6)  |
|          |            | 2019      | Both   | 415.1 (371.8 to 433.9)     | 326.8 (295.3 to 352.1)    | 4.1 (3.7 to 4.6)       | 25.8 (23.8 to 28.3)       | 48.6 (29.9 to 59.1)         | 9.9 (8 to 11.4)     |
|          |            |           | Female | 333.5 (254.2 to 355.6)     | 263.5 (200.2 to 286.9)    | 0.5 (0.4 to 0.6)       | 25.3 (22.5 to 28.5)       | 36.6 (21.8 to 43.5)         | 7.6 (4.7 to 9.9)    |
|          |            |           | Male   | 519.3 (489.5 to 540.7)     | 408.8 (378.2 to 446)      | 8.6 (7.7 to 9.9)       | 26 (23.7 to 29.1)         | 63.5 (33.6 to 79.6)         | 12.3 (10.3 to 13.8) |
|          | YLDs       | % Change  | Both   | -9.8 (-12.1 to -7)         | -2.8 (-5 to -0.4)         | -23.1 (-33.9 to -14.7) | -17.1 (-20.3 to -13.6)    | 14.5 (9.2 to 20.2)          | 68.2 (62.7 to 74.3) |
|          |            |           | Female | -5.9 (-8.3 to -3)          | 3.8 (0.8 to 7.3)          | -20.7 (-28.5 to -12.7) | -13.6 (-16.6 to -10.5)    | 12.7 (7 to 18.9)            | 73.5 (66.5 to 81.6) |
|          |            |           | Male   | -15.1 (-17.6 to -12.3)     | -11.5 (-13.4 to -9.2)     | -29.2 (-39.5 to -21.3) | -20.8 (-25.3 to -16.3)    | 15.2 (9.1 to 20.8)          | 61.9 (55.6 to 68.8) |
|          |            | 2019      | Both   | 509 (384.2 to 647.9)       | 216.7 (179.1 to 245.1)    | 1.6 (1.1 to 2.2)       | 267.9 (175.4 to 393.6)    | 10.2 (6.8 to 14.6)          | 12.5 (10 to 14.7)   |

| SDI             | Measure    | Year     | Sex    | CRD                       | Cause specific          |                        |                           |                             |                        |
|-----------------|------------|----------|--------|---------------------------|-------------------------|------------------------|---------------------------|-----------------------------|------------------------|
|                 |            |          |        |                           | COPD                    | Pneumoconiosis         | Asthma                    | ILD & pulmonary sarcoidosis | Other                  |
| High-middle SDI | Incidence  | % Change | Female | 520.7 (391.8 to 671)      | 204.4 (168.4 to 234.6)  | 0.3 (0.2 to 0.4)       | 293.5 (190.2 to 431.6)    | 9.8 (6.6 to 13.8)           | 12.8 (10.2 to 15.2)    |
|                 |            |          | Male   | 502.6 (383.5 to 634.6)    | 234 (193 to 269.2)      | 3.1 (2.2 to 4.4)       | 242.4 (157.9 to 357.8)    | 10.9 (7.3 to 15.5)          | 12.2 (9.7 to 14.6)     |
|                 |            |          | Both   | -11.8 (-14.8 to -9.1)     | -16 (-18.3 to -13.6)    | -10.7 (-20.7 to -2.3)  | -15.9 (-21.5 to -11.3)    | 2.5 (-0.4 to 5.8)           |                        |
|                 |            | 2019     | Female | -11.3 (-14.4 to -8.6)     | -14.1 (-16.6 to -11.5)  | -2.4 (-6.7 to 2.2)     | -15.4 (-21 to -10.7)      | 1.9 (-0.8 to 4.8)           |                        |
|                 |            |          | Male   | -12.7 (-15.5 to -9.8)     | -18.8 (-21.4 to -16.3)  | -12.6 (-23 to -3.6)    | -16.5 (-22.1 to -11.6)    | 3.2 (-0.7 to 7.4)           |                        |
|                 |            |          | Both   | 880.4 (759.8 to 1029)     | 180.6 (168.8 to 193.3)  | 3.2 (2.7 to 3.7)       | 470.7 (356.3 to 610)      | 225.9 (182.2 to 275.5)      |                        |
|                 |            | 2019     | Female | 849.2 (733.1 to 991)      | 157 (145.9 to 168.8)    | 0.7 (0.6 to 0.8)       | 475.1 (364.6 to 607.9)    | 216.4 (173.9 to 267)        |                        |
|                 |            |          | Male   | 919.7 (792.3 to 1077.4)   | 208 (195.1 to 222.4)    | 5.8 (5 to 6.8)         | 465.6 (348.6 to 616.3)    | 240.3 (194.9 to 291)        |                        |
|                 |            |          | Both   | -21.5 (-24.3 to -18.7)    | -17.1 (-19.5 to -14.6)  | -5.9 (-17.8 to 4.7)    | -26.8 (-32.1 to -22.2)    | 9.5 (5.5 to 13.7)           |                        |
|                 | Prevalence | % Change | Female | -21.3 (-24.3 to -18.6)    | -15.6 (-18.2 to -13)    | -1.4 (-7.3 to 4.9)     | -26.2 (-31.2 to -21.9)    | 10 (5.8 to 14.4)            |                        |
|                 |            |          | Male   | -22.2 (-24.9 to -19.4)    | -19.7 (-22.1 to -17.2)  | -9.5 (-21.3 to 1.2)    | -27.9 (-33.7 to -22.6)    | 8.7 (4.4 to 13)             |                        |
|                 |            |          | Both   | 5296.9 (4736.2 to 6016.1) | 2370.4 (2218 to 2534.4) | 51.6 (43.5 to 61)      | 3103 (2541.3 to 3833.3)   | 45.6 (38.9 to 52.4)         |                        |
|                 |            | 2019     | Female | 5141.3 (4587 to 5840)     | 2105.1 (1960.7 to 2258) | 5.8 (4.9 to 6.8)       | 3230.1 (2670.7 to 3923.3) | 44.9 (38 to 52)             |                        |
|                 |            |          | Male   | 5520 (4940.7 to 6240.6)   | 2722 (2561.4 to 2909)   | 103.8 (87.4 to 123.2)  | 2965.3 (2403.3 to 3714.1) | 47.1 (40.3 to 54)           |                        |
|                 |            |          | Both   | -58.9 (-64.1 to -41.5)    | -59.2 (-64.7 to -40.3)  | -63.3 (-70.4 to -45.8) | -66.8 (-73 to -59.8)      | 13.9 (-20.8 to 49.3)        | -61.1 (-67.1 to -28.1) |
|                 | Deaths     | % Change | Female | -61.6 (-69 to -34.8)      | -62.8 (-70.3 to -33.4)  | -41.2 (-63.7 to -22.1) | -63.3 (-72.1 to -53.3)    | 19.9 (-21 to 57.4)          | -57 (-65.7 to -20.4)   |
|                 |            |          | Male   | -57.4 (-62.7 to -45.8)    | -57.1 (-62.5 to -44.6)  | -65.7 (-72.7 to -48.4) | -71 (-76.4 to -65)        | 6.6 (-32.2 to 49.4)         | -66.3 (-72.5 to -20.5) |
|                 |            |          | Both   | 33.2 (29.5 to 39.3)       | 29.8 (26.2 to 35.8)     | 0.2 (0.2 to 0.3)       | 1.8 (1.6 to 2.1)          | 1.1 (0.8 to 1.3)            | 0.3 (0.2 to 0.3)       |
|                 |            | 2019     | Female | 23 (19.2 to 30.1)         | 20.1 (16.7 to 27.3)     | 0 (0 to 0)             | 1.7 (1.3 to 2)            | 1 (0.6 to 1.1)              | 0.2 (0.1 to 0.3)       |
|                 |            |          | Male   | 49.2 (43.7 to 55.6)       | 44.9 (39.6 to 51.2)     | 0.5 (0.4 to 0.7)       | 2 (1.8 to 2.4)            | 1.4 (0.9 to 1.7)            | 0.4 (0.3 to 0.5)       |
|                 |            |          | Both   | -52.6 (-57.3 to -39.9)    | -56 (-60.8 to -40.7)    | -45.5 (-55 to -32.6)   | -44.8 (-51.8 to -38.4)    | 1.1 (-19.7 to 20.3)         | -16.3 (-26.1 to 0.2)   |
|                 | DALYs      | % Change | Female | -50.8 (-57.2 to -31.2)    | -55.5 (-62.4 to -31.2)  | -31.3 (-50.1 to -18.2) | -41.6 (-49.6 to -34.4)    | 6 (-20.3 to 25.2)           | -2.2 (-15.3 to 21.2)   |
|                 |            |          | Male   | -54.8 (-59.5 to -44.9)    | -57.1 (-62.1 to -46.3)  | -48.8 (-57.9 to -35.9) | -49 (-56.2 to -41.6)      | -4.1 (-31.8 to 21.9)        | -29.1 (-39 to -2.1)    |
|                 |            |          | Both   | 837 (750.9 to 948.8)      | 617.7 (562.8 to 708.9)  | 11.9 (9.3 to 15.1)     | 158.3 (114 to 220.2)      | 26 (20.5 to 30)             | 23.1 (20 to 26.2)      |
|                 |            | 2019     | Female | 670.8 (584 to 792)        | 464.6 (408.4 to 571.8)  | 1.6 (1.3 to 2)         | 160.1 (113.8 to 224.2)    | 22.5 (17.2 to 26.4)         | 21.9 (18.7 to 25.3)    |
|                 |            |          | Male   | 1066.8 (964.9 to 1195.8)  | 830.7 (753.2 to 939.3)  | 23.9 (18.6 to 30.5)    | 157 (113.6 to 217.8)      | 30.5 (22.4 to 36.1)         | 24.6 (21.2 to 28.7)    |
|                 |            |          | Both   | -63.3 (-67.9 to -48)      | -63.9 (-68.7 to -46.8)  | -67.7 (-74.8 to -50.6) | -70.2 (-75.1 to -63.3)    | -0.4 (-24.8 to 22.7)        | -52.2 (-59.2 to -36.2) |
|                 | YLLs       | % Change | Female | -65.3 (-71.9 to -40.4)    | -66.7 (-73.6 to -39.1)  | -49.7 (-70.4 to -31.1) | -67.8 (-74.4 to -57.1)    | 5.2 (-25.8 to 29.5)         | -50.2 (-60.4 to -25.9) |
|                 |            |          | Male   | -62.7 (-67.6 to -51.2)    | -62.7 (-67.8 to -50.5)  | -69.8 (-76.9 to -53)   | -73 (-77.5 to -67.5)      | -6 (-37.1 to 24.7)          | -55.7 (-63.4 to -29.7) |
|                 |            |          | Both   | 501.1 (452.6 to 598.9)    | 429.7 (383.9 to 523.6)  | 4.5 (3.8 to 6.5)       | 36.5 (32.3 to 41.3)       | 21.3 (16.3 to 24.1)         | 9.1 (8.1 to 11.5)      |
|                 |            | 2019     | Female | 336.1 (287.9 to 450.6)    | 276.9 (233.6 to 380.9)  | 0.7 (0.5 to 0.9)       | 33.9 (28.4 to 40.2)       | 17.9 (12.7 to 21.1)         | 6.6 (5.3 to 9.2)       |
|                 |            |          | Male   | 727.2 (653.7 to 842.9)    | 640.7 (573.5 to 746.6)  | 9.2 (7.6 to 13.6)      | 39.9 (34.6 to 47.8)       | 25.6 (17.9 to 30.5)         | 11.8 (10.2 to 15.2)    |
|                 |            |          | Both   | -16.1 (-18.8 to -13.2)    | -12.7 (-15.9 to -9.3)   | -5.9 (-18.1 to 5.5)    | -25.8 (-31.1 to -21.3)    | 8.4 (3.6 to 13.4)           | 63.5 (54.5 to 71.7)    |
|                 | YLLs       | % Change | Both   | -16.1 (-18.8 to -13.2)    | -12.7 (-15.9 to -9.3)   | -5.9 (-18.1 to 5.5)    | -25.8 (-31.1 to -21.3)    | 8.4 (3.6 to 13.4)           | 63.5 (54.5 to 71.7)    |

| SDI        | Measure    | Year     | Sex    | CRD                       | Cause specific            |                        |                           |                             |                       |
|------------|------------|----------|--------|---------------------------|---------------------------|------------------------|---------------------------|-----------------------------|-----------------------|
|            |            |          |        |                           | COPD                      | Pneumoconiosis         | Asthma                    | ILD & pulmonary sarcoidosis | Other                 |
| Middle SDI | Incidence  | % Change | Female | -15.5 (-18.6 to -12.2)    | -11.9 (-15.6 to -7.9)     | -0.4 (-8 to 7.6)       | -25.3 (-30.5 to -21)      | 8.9 (3.2 to 15)             | 67.5 (56.8 to 77.4)   |
|            |            |          | Male   | -17.2 (-20 to -14.4)      | -14.3 (-17.4 to -10.8)    | -9.4 (-21.6 to 2.1)    | -26.7 (-32.4 to -21.6)    | 7.5 (2.1 to 13.4)           | 59.3 (50.3 to 68.3)   |
|            |            |          | Both   | 335.9 (265.7 to 410.6)    | 188 (154.3 to 215.5)      | 7.4 (4.9 to 10.5)      | 121.8 (77.6 to 185.5)     | 4.7 (3.1 to 6.8)            | 14 (11.2 to 16.6)     |
|            |            | 2019     | Female | 334.7 (264.7 to 409)      | 187.8 (152.6 to 219.1)    | 0.9 (0.6 to 1.2)       | 126.1 (80.7 to 190.4)     | 4.6 (3.1 to 6.7)            | 15.3 (12.3 to 18.5)   |
|            |            |          | Male   | 339.5 (266.4 to 420.3)    | 190 (153.2 to 221.6)      | 14.7 (9.8 to 21.1)     | 117.1 (74 to 177.4)       | 4.9 (3.3 to 7.1)            | 12.8 (10.1 to 15.4)   |
|            |            |          | Both   | -6.2 (-8 to -4.4)         | -16.7 (-19 to -14.2)      | -31.9 (-39.1 to -25.4) | -9.9 (-12.9 to -7)        | 14 (11.4 to 16.8)           |                       |
|            |            | 2019     | Female | -4.4 (-6.4 to -2.3)       | -14.1 (-16.8 to -11.2)    | 2.1 (-5.3 to 10.3)     | -9.7 (-13.2 to -6.4)      | 17.9 (15.2 to 21.2)         |                       |
|            |            |          | Male   | -8.1 (-9.7 to -6.4)       | -19.4 (-21.5 to -17.2)    | -35 (-42.9 to -27.8)   | -10.1 (-13 to -7.3)       | 9.8 (6.9 to 12.8)           |                       |
|            |            |          | Both   | 908.2 (789.5 to 1050.9)   | 187.3 (173.6 to 201.4)    | 2.6 (2.2 to 3)         | 471.8 (366.2 to 607.7)    | 246.6 (198.9 to 299.6)      |                       |
|            |            | 2019     | Female | 891.3 (777.3 to 1027.7)   | 183.5 (169.6 to 198.1)    | 0.9 (0.8 to 1.1)       | 454.8 (353.8 to 580.7)    | 252.1 (202.2 to 308.3)      |                       |
|            |            |          | Male   | 924.9 (802.9 to 1078.4)   | 191 (177.6 to 204.6)      | 4.3 (3.6 to 5.1)       | 487.7 (376.5 to 636.2)    | 241.8 (195.3 to 290.9)      |                       |
|            | Prevalence | % Change | Both   | -9.6 (-11.4 to -7.6)      | -9.4 (-12 to -6.8)        | -14.4 (-24.7 to -5.1)  | -10.5 (-13.5 to -7.3)     | 20.5 (16.6 to 24.5)         |                       |
|            |            |          | Female | -12.6 (-14.7 to -10.5)    | -12 (-15 to -8.9)         | -24.6 (-29.5 to -19.8) | -14.3 (-17.5 to -11.1)    | 19.5 (15.4 to 23.7)         |                       |
|            |            |          | Male   | -6.6 (-8.4 to -4.6)       | -6.5 (-8.9 to -4.1)       | -11.2 (-22.7 to -0.8)  | -7 (-10.2 to -3.7)        | 21.5 (17.4 to 25.5)         |                       |
|            |            | 2019     | Both   | 5264.2 (4747.4 to 5910.8) | 2512.8 (2336.8 to 2705.6) | 58.5 (48.8 to 69.3)    | 2927.1 (2429.3 to 3578.8) | 39 (32.8 to 45.4)           |                       |
|            |            |          | Female | 4964.6 (4486 to 5564.7)   | 2397.1 (2218.7 to 2587.9) | 8.3 (7.2 to 9.6)       | 2757.7 (2277.9 to 3358.8) | 38.9 (32.6 to 45.5)         |                       |
|            |            |          | Male   | 5574 (5029.6 to 6275.9)   | 2642.4 (2465.6 to 2840.7) | 112.4 (93.1 to 134.2)  | 3093.8 (2570.3 to 3815.4) | 39.4 (33.2 to 45.9)         |                       |
|            | Deaths     | % Change | Both   | -55.4 (-61.5 to -42.4)    | -55.9 (-61.9 to -42.3)    | -56.2 (-68.9 to -30.6) | -59.8 (-69.3 to -49)      | 15.1 (-11 to 48.1)          | -3.5 (-32.9 to 29.5)  |
|            |            |          | Female | -60.9 (-69.2 to -40.7)    | -62 (-70 to -41.1)        | -48.4 (-70.3 to -27.7) | -60.5 (-72.7 to -45.2)    | 20.7 (-21.1 to 62.7)        | -8.6 (-45.6 to 31.9)  |
|            |            |          | Male   | -50 (-57.3 to -39.3)      | -49.8 (-57.3 to -38.3)    | -56.2 (-69.2 to -27.9) | -59.2 (-69.1 to -47.9)    | 10 (-16.9 to 72.8)          | 0.8 (-25.7 to 46)     |
|            |            | 2019     | Both   | 59.8 (52.3 to 66.6)       | 52.3 (46.1 to 58.7)       | 0.3 (0.3 to 0.4)       | 5.3 (4.6 to 6)            | 1.4 (1.1 to 1.7)            | 0.4 (0.3 to 0.5)      |
|            |            |          | Female | 45.9 (37 to 55.3)         | 39.5 (32 to 48.2)         | 0.1 (0 to 0.1)         | 4.8 (3.6 to 5.6)          | 1.3 (0.9 to 1.7)            | 0.3 (0.2 to 0.4)      |
|            |            |          | Male   | 77.2 (68.6 to 87)         | 68.3 (60.2 to 77.1)       | 0.6 (0.5 to 0.8)       | 6 (5.2 to 7.2)            | 1.7 (1.3 to 2.1)            | 0.6 (0.4 to 0.7)      |
|            | DALYs      | % Change | Both   | -51.4 (-56.7 to -40.2)    | -54.4 (-59.7 to -41.7)    | -45 (-57.1 to -26.2)   | -45.1 (-54 to -36.8)      | 10.8 (-8.2 to 36.7)         | 14.5 (-8.3 to 35.2)   |
|            |            |          | Female | -55.1 (-61.8 to -38.2)    | -58.6 (-65.5 to -39.9)    | -42.6 (-62.5 to -29.3) | -46.8 (-57.1 to -36.3)    | 15.5 (-16.2 to 46.7)        | 15.7 (-13.7 to 38.2)  |
|            |            |          | Male   | -48 (-54.7 to -38.1)      | -50.3 (-57.4 to -39.4)    | -44.1 (-56.9 to -23.1) | -43.8 (-52.9 to -34)      | 7 (-17 to 54.8)             | 14.2 (-6.9 to 40.2)   |
|            |            | 2019     | Both   | 1316.9 (1200 to 1449.4)   | 1007.2 (915.7 to 1112.4)  | 15.5 (12.4 to 19.4)    | 230.6 (183.8 to 290.3)    | 31.2 (26.1 to 37.3)         | 32.4 (28.4 to 36.4)   |
|            |            |          | Female | 1070.5 (937.1 to 1210.9)  | 798.6 (691.5 to 925.4)    | 2.2 (1.7 to 2.7)       | 212.6 (169.3 to 269.4)    | 27.8 (21.8 to 36.3)         | 29.4 (25.3 to 33.5)   |
|            |            |          | Male   | 1602.9 (1436.4 to 1781.8) | 1252.3 (1119.3 to 1400.1) | 30 (23.9 to 37.7)      | 250 (200.2 to 315.9)      | 35.2 (28.1 to 44.2)         | 35.5 (30.2 to 41.2)   |
|            | YLLs       | % Change | Both   | -59.5 (-65 to -47.7)      | -60.6 (-66.1 to -47.5)    | -60.9 (-72.7 to -35.4) | -60.4 (-67.8 to -52)      | 9.7 (-11.6 to 39.6)         | -17.9 (-40.8 to 8.6)  |
|            |            |          | Female | -64.7 (-71.8 to -46)      | -66.6 (-73.7 to -46.5)    | -56.5 (-76.7 to -37.2) | -61.8 (-71 to -49.7)      | 15.2 (-19.5 to 52.3)        | -24.9 (-53.2 to 5.1)  |
|            |            |          | Male   | -54.8 (-61.7 to -43.9)    | -55.3 (-62.6 to -43.7)    | -60.5 (-73 to -32.4)   | -59.3 (-67.5 to -48.6)    | 5.5 (-20.3 to 60.9)         | -12.5 (-35.2 to 21.5) |
|            |            | 2019     | Both   | 927.5 (823.1 to 1027)     | 762.8 (672.6 to 853.8)    | 7.2 (5.8 to 8.9)       | 115.7 (100.3 to 130.3)    | 27.2 (22.4 to 33.4)         | 14.6 (12.2 to 17.7)   |

| SDI            | Measure    | Year     | Sex                    | CRD                       | Cause specific            |                        |                           |                             |                       |
|----------------|------------|----------|------------------------|---------------------------|---------------------------|------------------------|---------------------------|-----------------------------|-----------------------|
|                |            |          |                        |                           | COPD                      | Pneumoconiosis         | Asthma                    | ILD & pulmonary sarcoidosis | Other                 |
| Low-middle SDI | YLDs       |          | Female                 | 688.5 (568.5 to 820.5)    | 548.3 (447.5 to 672.2)    | 1 (0.8 to 1.2)         | 104.6 (81.9 to 122.2)     | 23.8 (17.7 to 32.1)         | 10.8 (8.2 to 14.3)    |
|                |            |          | Male                   | 1206.9 (1070.8 to 1361.6) | 1015 (888.2 to 1150.4)    | 14.1 (11.2 to 17.7)    | 128.1 (111.7 to 153.6)    | 31.1 (23.8 to 40.3)         | 18.5 (14.2 to 23.5)   |
|                |            |          | Both                   | -7.5 (-9.6 to -5.5)       | -9.5 (-12.2 to -6.6)      | -14.9 (-25.2 to -5.1)  | -9.9 (-13 to -6.7)        | 18.6 (14.4 to 23.5)         | 69.8 (60.6 to 77.2)   |
|                |            | % Change | Female                 | -11.1 (-13.6 to -8.5)     | -13.2 (-16.4 to -9.8)     | -23.4 (-30 to -16.1)   | -13.7 (-17.2 to -10.4)    | 17.6 (12.2 to 23.5)         | 68.6 (56.9 to 77.5)   |
|                |            |          | Male                   | -3.5 (-5.5 to -1.6)       | -4.7 (-7.2 to -2.1)       | -11.8 (-23.3 to -0.9)  | -6.5 (-9.8 to -3.2)       | 19.7 (14.3 to 25.9)         | 71.6 (63.1 to 79.9)   |
|                |            |          | Both                   | 389.5 (313.1 to 462.8)    | 244.4 (203.2 to 278.2)    | 8.3 (5.5 to 12)        | 115 (74.2 to 172.5)       | 4 (2.7 to 5.9)              | 17.8 (14.4 to 20.7)   |
|                |            | 2019     | Female                 | 382 (307.8 to 451.2)      | 250.2 (207.3 to 288.6)    | 1.2 (0.8 to 1.7)       | 107.9 (69.6 to 161.4)     | 4 (2.7 to 5.8)              | 18.6 (15.1 to 21.8)   |
|                |            |          | Male                   | 396 (314.3 to 482.7)      | 237.3 (195 to 273.6)      | 15.9 (10.4 to 22.9)    | 121.9 (78.5 to 182.5)     | 4.1 (2.7 to 6)              | 16.9 (13.7 to 20)     |
|                |            |          | Both                   | -6.7 (-8.4 to -5.1)       | -6.3 (-7.6 to -4.9)       | -2.5 (-7.3 to 3)       | -13.9 (-17.1 to -10.8)    | 2.2 (-0.6 to 4.9)           |                       |
|                |            | 2019     | Female                 | -6 (-7.9 to -4.3)         | -5.2 (-6.6 to -3.8)       | 40.2 (28 to 54.5)      | -13.3 (-16.6 to -9.9)     | 2.4 (-1.2 to 5.7)           |                       |
|                | Male       |          | -7.5 (-9.1 to -5.9)    | -7 (-8.4 to -5.7)         | -10.7 (-17 to -4.4)       | -14.4 (-17.8 to -11.3) | 1.6 (-1.2 to 4.6)         |                             |                       |
|                | Both       |          | 1022.4 (907.9 to 1142) | 236.6 (223.9 to 247.7)    | 1.4 (1.2 to 1.6)          | 409.3 (335.6 to 505.7) | 375.1 (302.4 to 452.6)    |                             |                       |
|                | Prevalence | % Change | Female                 | 1017.1 (906.9 to 1135.8)  | 230.8 (218.2 to 241.5)    | 0.8 (0.6 to 0.9)       | 402.4 (332.3 to 485.3)    | 383.2 (306.9 to 465.3)      |                       |
|                |            |          | Male                   | 1027.4 (911.3 to 1149.8)  | 243.3 (230.6 to 254.5)    | 2 (1.7 to 2.3)         | 415.7 (336.8 to 519.6)    | 366.4 (295.9 to 441.6)      |                       |
|                |            |          | Both                   | -8.4 (-10.2 to -6.8)      | -2.9 (-4.5 to -1.3)       | -3.8 (-11.5 to 2.7)    | -14 (-17.7 to -11)        | 2.1 (-0.6 to 4.9)           |                       |
|                |            | 2019     | Female                 | -9.1 (-11.2 to -7.3)      | -2.5 (-4.1 to -0.8)       | 0.9 (-4.8 to 7.1)      | -15.8 (-19.7 to -12.7)    | 1.7 (-1.4 to 4.6)           |                       |
|                |            |          | Male                   | -7.8 (-9.6 to -6)         | -3.5 (-5.2 to -1.8)       | -0.2 (-9.2 to 7.5)     | -12.1 (-16.1 to -9)       | 2 (-0.8 to 5.3)             |                       |
|                |            |          | Both                   | 5417.1 (5005.5 to 5903.1) | 3005.2 (2849.4 to 3163.1) | 18.3 (15.6 to 21.4)    | 2713.2 (2317.3 to 3209.7) | 54.3 (45.8 to 63.3)         |                       |
|                |            | 2019     | Female                 | 5302.9 (4909.9 to 5726.8) | 3014.1 (2857.4 to 3170.3) | 4.6 (4 to 5.5)         | 2579.5 (2204.5 to 2998.1) | 56.6 (47.7 to 66)           |                       |
|                |            |          | Male                   | 5532.2 (5107.5 to 6060.7) | 2995 (2841.5 to 3156.7)   | 32.9 (27.7 to 38.4)    | 2850.4 (2431.2 to 3416.3) | 51.9 (43.7 to 60.4)         |                       |
|                |            |          | Both                   | -33.1 (-44.2 to -23.8)    | -30.1 (-41 to -20.1)      | -46.7 (-58 to -16.5)   | -49.6 (-60.7 to -39.2)    | 8.4 (-13.9 to 35.5)         | -12.1 (-30.3 to 15.6) |
|                |            | % Change | Female                 | -31.8 (-46.6 to -14.4)    | -28.9 (-42.3 to -12.4)    | -19.4 (-41.2 to 6.7)   | -46.2 (-61.6 to -26)      | 24.9 (-7.2 to 70.1)         | -11.7 (-36.2 to 20.2) |
|                | Male       |          | -33 (-45.4 to -20.6)   | -29.5 (-43.8 to -16.3)    | -46.2 (-58.7 to -9.7)     | -53.2 (-65.5 to -34.4) | -1.2 (-25.8 to 64.6)      | -10.9 (-31.4 to 35.9)       |                       |
|                | Both       |          | 107.3 (90.1 to 120.8)  | 86.1 (71.7 to 97)         | 0.3 (0.2 to 0.4)          | 16.3 (11.6 to 21.3)    | 3.7 (2.5 to 5.2)          | 0.9 (0.6 to 1.1)            |                       |
|                | Deaths     | 2019     | Female                 | 91 (68.7 to 108.4)        | 70.1 (52.6 to 84.8)       | 0.1 (0.1 to 0.1)       | 16.8 (10.5 to 23.5)       | 3.3 (1.9 to 4.7)            | 0.6 (0.4 to 0.9)      |
|                |            |          | Male                   | 126.3 (105.8 to 144.6)    | 104.7 (88 to 119.8)       | 0.6 (0.4 to 0.7)       | 15.6 (10.8 to 20.7)       | 4.2 (2.3 to 6.7)            | 1.1 (0.7 to 1.5)      |
|                |            |          | Both                   | -34 (-42.5 to -26.5)      | -31 (-40 to -22.7)        | -42.3 (-53.6 to -18.2) | -48.1 (-57.1 to -39.5)    | 2.3 (-18.7 to 26.5)         | 9.2 (-12 to 34.8)     |
|                |            | % Change | Female                 | -32.4 (-43.4 to -18.9)    | -29 (-39 to -15.7)        | -19.2 (-36 to -1.9)    | -46.2 (-58.3 to -31.5)    | 16.2 (-9.7 to 50.7)         | 15.6 (-13.4 to 44.5)  |
|                |            |          | Male                   | -34.3 (-45 to -23.5)      | -31.2 (-44.2 to -19.3)    | -41.7 (-54 to -13.9)   | -50.1 (-60.4 to -35.4)    | -5.2 (-29.7 to 51.3)        | 6.1 (-16.5 to 43.2)   |
|                |            |          | Both                   | 2314.2 (2029.7 to 2562.1) | 1728.6 (1488.8 to 1923.7) | 9.2 (7.2 to 11.3)      | 445.9 (348.5 to 546.3)    | 78.6 (54.3 to 107)          | 51.9 (43.2 to 59.9)   |
|                |            | 2019     | Female                 | 2000 (1615.7 to 2309.1)   | 1437.6 (1160.2 to 1690.3) | 2 (1.6 to 2.5)         | 448.9 (313.8 to 577.4)    | 67.8 (41.1 to 96.4)         | 43.7 (36 to 52.7)     |
|                |            |          | Male                   | 2664 (2301.4 to 3019)     | 2054.8 (1767.3 to 2331.9) | 17.1 (13 to 21.1)      | 441.7 (339.1 to 568.8)    | 90.1 (51 to 140.5)          | 60.3 (46.4 to 73.6)   |
|                |            |          | Both                   | -38.9 (-48.4 to -30.1)    | -35.5 (-45.5 to -25.8)    | -50.2 (-61.3 to -24.6) | -53.8 (-62.2 to -44.8)    | 2.2 (-20 to 29.5)           | -17.1 (-36.2 to 11.7) |
| YLLs           |            | % Change | Both                   | -38.9 (-48.4 to -30.1)    | -35.5 (-45.5 to -25.8)    | -50.2 (-61.3 to -24.6) | -53.8 (-62.2 to -44.8)    | 2.2 (-20 to 29.5)           | -17.1 (-36.2 to 11.7) |

| SDI     | Measure    | Year     | Sex    | CRD                       | Cause specific            |                        |                           |                             |                       |
|---------|------------|----------|--------|---------------------------|---------------------------|------------------------|---------------------------|-----------------------------|-----------------------|
|         |            |          |        |                           | COPD                      | Pneumoconiosis         | Asthma                    | ILD & pulmonary sarcoidosis | Other                 |
| Low SDI | YLDs       |          | Female | -38.2 (-50.9 to -22.3)    | -34.6 (-47 to -18.5)      | -27.2 (-47.2 to -2.8)  | -51.2 (-63.4 to -35.2)    | 17.7 (-10.7 to 58.4)        | -20.1 (-44.4 to 12.5) |
|         |            |          | Male   | -38.4 (-49.8 to -26.5)    | -34.7 (-48.6 to -21.6)    | -49.7 (-61.4 to -18.8) | -56.3 (-66.4 to -40.2)    | -5.7 (-30.8 to 59.5)        | -14.1 (-34.9 to 26)   |
|         |            |          | Both   | 1843 (1554 to 2078.8)     | 1393 (1145.1 to 1575.9)   | 6.6 (4.8 to 8.4)       | 341.5 (250.4 to 429.7)    | 73 (50.1 to 101.3)          | 28.8 (21.2 to 36.4)   |
|         |            | 2019     | Female | 1525.3 (1153 to 1811.4)   | 1092.3 (808.2 to 1332.2)  | 1.3 (1 to 1.7)         | 350.1 (228 to 471.8)      | 62.1 (35.3 to 90.2)         | 19.7 (12.7 to 27.5)   |
|         |            |          | Male   | 2196.8 (1851.5 to 2539.1) | 1729.9 (1450.5 to 2001.4) | 12.4 (8.7 to 16)       | 331.6 (237.5 to 431.8)    | 84.8 (45.8 to 135.5)        | 38.2 (24.8 to 50.8)   |
|         |            |          | Both   | -3.4 (-5.3 to -1.6)       | -3 (-4.9 to -1.2)         | -3.8 (-12.6 to 4.4)    | -13.7 (-17.4 to -10.5)    | 2.3 (-1.9 to 7.1)           | 80.6 (72.2 to 87.2)   |
|         |            | % Change | Female | -3.1 (-5.3 to -1)         | -2.2 (-4.2 to -0.3)       | 1.1 (-5 to 8.7)        | -15.5 (-19.5 to -12.3)    | 2.1 (-3.2 to 8)             | 82.1 (72.9 to 89.5)   |
|         |            |          | Male   | -3.9 (-5.8 to -1.9)       | -4.2 (-6.2 to -2.2)       | -0.5 (-10.9 to 9.3)    | -11.8 (-15.8 to -8.3)     | 2.2 (-3.2 to 8.4)           | 79 (69.7 to 87.4)     |
|         |            |          | Both   | 471.3 (387.6 to 541.2)    | 335.6 (283.2 to 374.4)    | 2.6 (1.8 to 3.7)       | 104.4 (68.4 to 154.2)     | 5.5 (3.7 to 8.1)            | 23.1 (19 to 26.4)     |
|         |            | 2019     | Female | 474.6 (391 to 542)        | 345.3 (292.5 to 392.6)    | 0.7 (0.5 to 1)         | 98.9 (64.8 to 146.3)      | 5.7 (3.8 to 8.3)            | 24 (19.7 to 27.8)     |
|         |            |          | Male   | 467.1 (379.3 to 544.1)    | 324.9 (270.3 to 367.7)    | 4.7 (3.1 to 6.6)       | 110.1 (71.6 to 163)       | 5.3 (3.5 to 7.8)            | 22.1 (18.1 to 25.6)   |
|         | Incidence  | % Change | Both   | -8.2 (-9.8 to -6.6)       | -2.7 (-3.9 to -1.5)       | -13.1 (-16.2 to -10)   | -14 (-17 to -11)          | 0.8 (-1.8 to 3.4)           |                       |
|         |            |          | Female | -3.3 (-5.1 to -1.4)       | 4.4 (2.8 to 6)            | 46.6 (37.9 to 56.1)    | -10.5 (-13.3 to -7.4)     | 7.5 (4 to 11.6)             |                       |
|         |            |          | Male   | -13.3 (-15.4 to -11.4)    | -9.2 (-10.8 to -7.7)      | -32.9 (-36.2 to -29.4) | -17.6 (-21.2 to -14)      | -6.7 (-9.3 to -4.1)         |                       |
|         |            | 2019     | Both   | 961.7 (852.9 to 1095)     | 172.6 (163 to 181.5)      | 0.6 (0.5 to 0.8)       | 511.2 (415.1 to 624.6)    | 277.2 (225.9 to 331.6)      |                       |
|         |            |          | Female | 1020.3 (909.7 to 1150)    | 174.3 (164.8 to 183.2)    | 0.6 (0.5 to 0.7)       | 544.2 (448.7 to 657.6)    | 301.3 (245.3 to 359.7)      |                       |
|         |            |          | Male   | 902 (796.8 to 1034.4)     | 171.5 (161.4 to 180.9)    | 0.7 (0.6 to 0.8)       | 477.6 (381 to 602.2)      | 252.2 (206.2 to 301.7)      |                       |
|         | Prevalence | % Change | Both   | -7.8 (-9.9 to -5.8)       | 2 (0.6 to 3.4)            | -1.8 (-6 to 2.6)       | -13.4 (-16.6 to -10.2)    | 2.9 (0.5 to 5.4)            |                       |
|         |            |          | Female | -9.2 (-10.9 to -7.2)      | 4.6 (2.6 to 6.3)          | 18.7 (8.5 to 30.1)     | -16.6 (-19.1 to -13.8)    | 6.8 (3.3 to 10.4)           |                       |
|         |            |          | Male   | -6.4 (-9.3 to -4)         | -0.7 (-2.6 to 1.1)        | -8 (-12.5 to -3.6)     | -9.9 (-14.7 to -5.9)      | -1.7 (-4.6 to 1.2)          |                       |
|         |            | 2019     | Both   | 5549.6 (5101.6 to 6120.7) | 2335.7 (2211.1 to 2474.4) | 3.9 (3.3 to 4.5)       | 3468.6 (3015.3 to 4035.8) | 39.6 (33.5 to 46.1)         |                       |
|         |            |          | Female | 5609.3 (5176.7 to 6130.7) | 2366.1 (2242.5 to 2500.2) | 2.6 (2.3 to 3.1)       | 3489.5 (3047 to 4005.6)   | 42.5 (36 to 49.6)           |                       |
|         |            |          | Male   | 5491 (5004.1 to 6116.1)   | 2307.5 (2179.4 to 2453.2) | 5.1 (4.3 to 6.1)       | 3448 (2964.7 to 4110)     | 36.5 (30.9 to 42.6)         |                       |
|         | Deaths     | % Change | Both   | -23.4 (-33.7 to -13.8)    | -16.5 (-27.3 to -4.4)     | -35.5 (-50.3 to -8.3)  | -43.1 (-51.1 to -33.4)    | 13.5 (-14.4 to 48)          | -7.4 (-29.6 to 21.9)  |
|         |            |          | Female | -18 (-33.6 to 1.4)        | -7.6 (-26.2 to 18.8)      | -9.4 (-30.2 to 18.6)   | -39 (-51.6 to -21.2)      | 37.3 (0.5 to 80)            | -3.9 (-37.4 to 46.1)  |
|         |            |          | Male   | -27.1 (-40.4 to -12.8)    | -21.3 (-37.3 to -5.9)     | -37.4 (-53.4 to -8.9)  | -48.2 (-57.1 to -32.8)    | -1.4 (-28.9 to 46.6)        | -8.3 (-30.3 to 23.3)  |
|         |            | 2019     | Both   | 87.8 (74.2 to 97.7)       | 64.4 (54.4 to 73.3)       | 0.3 (0.1 to 0.4)       | 18.9 (13.4 to 28.7)       | 3.2 (2 to 4.4)              | 0.9 (0.7 to 1.2)      |
|         |            |          | Female | 77.9 (58.1 to 93)         | 53 (38.5 to 66)           | 0.1 (0.1 to 0.1)       | 21.1 (12 to 33.7)         | 3 (1.6 to 4.4)              | 0.7 (0.4 to 0.9)      |
|         |            |          | Male   | 99.2 (84 to 112.8)        | 77.5 (63.3 to 88.9)       | 0.4 (0.1 to 0.7)       | 16.5 (11.2 to 25)         | 3.5 (1.6 to 5.5)            | 1.2 (0.7 to 1.7)      |
|         | DALYs      | % Change | Both   | -25.5 (-32.8 to -18.2)    | -18.2 (-26.9 to -8.9)     | -35.7 (-49.9 to -11.8) | -42.2 (-48.9 to -33)      | 5.8 (-19.5 to 35.5)         | 11.5 (-14.6 to 42.8)  |
|         |            |          | Female | -22.2 (-32.8 to -7.2)     | -11.5 (-25.2 to 8.6)      | -9.3 (-26.9 to 15.7)   | -40.5 (-49.7 to -24.2)    | 26 (-4.1 to 62.1)           | 19 (-19.7 to 67.4)    |
|         |            |          | Male   | -27.7 (-37.9 to -16.7)    | -22 (-35.8 to -8.8)       | -37.9 (-53.6 to -13.4) | -44.4 (-52.2 to -32.4)    | -6.5 (-32.1 to 31.5)        | 6.9 (-17 to 39)       |
|         |            | 2019     | Both   | 2048.4 (1802 to 2247.1)   | 1364.1 (1201.6 to 1522.6) | 6.2 (3.1 to 8.6)       | 553.9 (434.7 to 726.8)    | 66.6 (44.1 to 89.2)         | 57.6 (45.8 to 69.1)   |
|         |            |          | Female | 1889.4 (1559.1 to 2169.1) | 1176 (940.8 to 1401.5)    | 2.3 (1.6 to 3.4)       | 599.2 (405.6 to 848.5)    | 61.8 (36.3 to 87.2)         | 50.1 (37.5 to 63.8)   |
|         | YLLs       | % Change | Male   | 2221.4 (1970.7 to 2484.9) | 1568.3 (1344.6 to 1785.3) | 10.2 (3.8 to 15.6)     | 506.2 (387.4 to 668.2)    | 71.5 (37 to 110.6)          | 65.2 (46.7 to 81.6)   |
|         |            |          | Both   | -30.4 (-38.6 to -21.9)    | -22.3 (-32.1 to -11.8)    | -38 (-52.4 to -13.6)   | -47.8 (-54.7 to -38.2)    | 6 (-20.7 to 38.3)           | -11.6 (-36.8 to 23.2) |
|         |            |          | Female | -27.4 (-39.7 to -9)       | -15.9 (-32.1 to 9.8)      | -13.8 (-32.7 to 14.2)  | -45.1 (-55.2 to -26.4)    | 27.7 (-4.6 to 67.2)         | -11.9 (-45.7 to 53.8) |
|         |            |          | Male   | -32.1 (-43.1 to -19.3)    | -25.3 (-40.4 to -10)      | -39.6 (-55.8 to -14.4) | -51.2 (-58.5 to -39)      | -6.8 (-33.3 to 35.8)        | -10.8 (-33.3 to 22.9) |

| SDI | Measure | Year     | Sex    | CRD                       | Cause specific            |                      |                        |                             |                     |
|-----|---------|----------|--------|---------------------------|---------------------------|----------------------|------------------------|-----------------------------|---------------------|
|     |         |          |        |                           | COPD                      | Pneumoconiosis       | Asthma                 | ILD & pulmonary sarcoidosis | Other               |
|     |         | 2019     | Both   | 1601.3 (1372.3 to 1772.7) | 1078.8 (919.7 to 1231.7)  | 5.6 (2.5 to 8)       | 419.8 (309.7 to 584.7) | 62.5 (40 to 85.2)           | 34.7 (23.9 to 45.2) |
|     |         |          | Female | 1427.7 (1096.6 to 1696.9) | 878.1 (646.6 to 1101.1)   | 1.9 (1.2 to 3)       | 464.7 (286.1 to 699.5) | 57.4 (31.5 to 83)           | 25.6 (13.2 to 38.1) |
|     |         |          | Male   | 1789.1 (1544.3 to 2038.1) | 1295.6 (1067.7 to 1507.7) | 9.4 (3 to 14.7)      | 372.4 (269.7 to 529)   | 67.7 (32.7 to 107.1)        | 44 (25.9 to 59.2)   |
|     | YLDs    | % Change | Both   | -0.7 (-2.8 to 1.6)        | 2.4 (0.4 to 4.2)          | -1.3 (-7.1 to 4.5)   | -13.1 (-16.4 to -9.7)  | 3.3 (-1.6 to 8.4)           | 84.8 (78 to 90.9)   |
|     |         |          | Female | -0.1 (-2.6 to 2.7)        | 4.9 (2.6 to 7.1)          | 18.6 (7.9 to 30.3)   | -16.3 (-18.9 to -13.2) | 6.8 (-0.1 to 14.2)          | 87.8 (79.7 to 95.3) |
|     |         |          | Male   | -1.5 (-3.8 to 0.7)        | -0.7 (-2.9 to 1.6)        | -7.5 (-14.4 to -0.1) | -9.5 (-14.3 to -5.4)   | -0.9 (-7.3 to 5.2)          | 81.4 (73.7 to 89)   |
|     |         | 2019     | Both   | 447.1 (362.8 to 522.3)    | 285.3 (240.4 to 319.7)    | 0.6 (0.4 to 0.8)     | 134.1 (87.3 to 196.7)  | 4.1 (2.7 to 6.1)            | 22.9 (18.9 to 26.3) |
|     |         |          | Female | 461.6 (374.2 to 540.8)    | 297.9 (251.6 to 337.7)    | 0.4 (0.3 to 0.6)     | 134.5 (88.2 to 196.2)  | 4.4 (2.9 to 6.4)            | 24.5 (20.2 to 28.4) |
|     |         |          | Male   | 432.3 (349.6 to 513.6)    | 272.7 (227.7 to 310)      | 0.8 (0.5 to 1.1)     | 133.7 (87.1 to 196.8)  | 3.9 (2.6 to 5.7)            | 21.2 (17.4 to 24.6) |

\* % Change (1990 to 2019). Data in parentheses are 95% Uncertainty Intervals (95% UIs)

CRD= Chronic Respiratory Disease, COPD= Chronic Obstructive Pulmonary Disease; ILD= Interstitial Lung Disease; DALYs= Disability-Adjusted Life Years; YLLs= Years of Life Lost; YLDs= Years Lived with Disability

**Table S3. Results from decomposition analysis of the total incidence number in both sexes combined, by region and SDI**

| Location                                     |                              | New cases, No. |            | Expected new cases in 2019, No. |                                   | new cases change cause, 1990 to 2019, % |                                          |                                            | % 1990 - 2019 new cases overall change |
|----------------------------------------------|------------------------------|----------------|------------|---------------------------------|-----------------------------------|-----------------------------------------|------------------------------------------|--------------------------------------------|----------------------------------------|
|                                              |                              | 1990           | 2019       | Given population growth alone   | Given population growth and Aging | Due to Population Growth <sup>a</sup>   | Due to Age Structure Change <sup>b</sup> | Due to Incidence Rates Change <sup>c</sup> |                                        |
| <b>Global</b>                                |                              | 52,094,520     | 77,625,300 | 75,344,112                      | 82,335,418                        | 44.6%                                   | 13.4%                                    | -9%                                        | 49%                                    |
| <b>Socio-demographic index (SDI)</b>         | High SDI                     | 11,692,808     | 16,628,212 | 14,415,004                      | 16,061,559                        | 23.3%                                   | 14.1%                                    | 4.8%                                       | 42.2%                                  |
|                                              | High-middle SDI              | 11,008,278     | 13,350,581 | 13,687,284                      | 15,616,398                        | 24.3%                                   | 17.5%                                    | -20.6%                                     | 21.3%                                  |
|                                              | Middle SDI                   | 14,510,341     | 20,945,765 | 20,256,220                      | 22,515,434                        | 39.6%                                   | 15.6%                                    | -10.8%                                     | 44.4%                                  |
|                                              | Low-middle SDI               | 9,797,254      | 15,677,195 | 15,298,734                      | 16,968,784                        | 56.2%                                   | 17%                                      | -13.2%                                     | 60%                                    |
|                                              | Low SDI                      | 5,054,489      | 9,354,697  | 10,801,832                      | 10,442,090                        | 113.7%                                  | -7.1%                                    | -21.5%                                     | 85.1%                                  |
| <b>Global burden of Disease (GBD) Region</b> | Andean Latin America         | 593,228        | 925,985    | 988,200                         | 901,389                           | 66.6%                                   | -14.6%                                   | 4.1%                                       | 56.1%                                  |
|                                              | Australasia                  | 259,283        | 400,028    | 371,630                         | 415,817                           | 43.3%                                   | 17%                                      | -6.1%                                      | 54.3%                                  |
|                                              | Caribbean                    | 463,274        | 556,221    | 619,475                         | 555,742                           | 33.7%                                   | -13.8%                                   | 0.1%                                       | 20.1%                                  |
|                                              | Central Asia                 | 527,735        | 689,353    | 712,605                         | 745,505                           | 35%                                     | 6.2%                                     | -10.6%                                     | 30.6%                                  |
|                                              | Central Europe               | 1,595,826      | 1,571,474  | 1,482,360                       | 1,700,517                         | -7.1%                                   | 13.7%                                    | -8.1%                                      | -1.5%                                  |
|                                              | Central Latin America        | 1,874,163      | 2,588,455  | 2,855,044                       | 2,800,534                         | 52.3%                                   | -2.9%                                    | -11.3%                                     | 38.1%                                  |
|                                              | Central Sub-Saharan Africa   | 510,186        | 1,070,393  | 1,208,797                       | 1,156,052                         | 136.9%                                  | -10.3%                                   | -16.8%                                     | 109.8%                                 |
|                                              | East Asia                    | 8,921,287      | 12,361,464 | 10,720,402                      | 14,240,116                        | 20.2%                                   | 39.5%                                    | -21.1%                                     | 38.6%                                  |
|                                              | Eastern Europe               | 2,777,262      | 1,908,498  | 2,574,534                       | 2,799,662                         | -7.3%                                   | 8.1%                                     | -32.1%                                     | -31.3%                                 |
|                                              | Eastern Sub-Saharan Africa   | 2,147,962      | 3,969,476  | 4,651,096                       | 4,395,202                         | 116.5%                                  | -11.9%                                   | -19.8%                                     | 84.8%                                  |
|                                              | High-income Asia Pacific     | 2,200,219      | 2,364,621  | 2,374,972                       | 3,299,972                         | 7.9%                                    | 42%                                      | -42.5%                                     | 7.5%                                   |
|                                              | High-income North America    | 5,976,779      | 9,936,830  | 7,756,170                       | 8,499,908                         | 29.8%                                   | 12.4%                                    | 24%                                        | 66.3%                                  |
|                                              | North Africa and Middle East | 3,154,020      | 5,803,364  | 5,564,468                       | 5,389,298                         | 76.4%                                   | -5.6%                                    | 13.1%                                      | 84%                                    |
|                                              | Oceania                      | 74,682         | 145,544    | 153,252                         | 155,287                           | 105.2%                                  | 2.7%                                     | -13%                                       | 94.9%                                  |
|                                              | South Asia                   | 8,725,665      | 16,529,328 | 14,350,591                      | 17,770,461                        | 64.5%                                   | 39.2%                                    | -14.2%                                     | 89.4%                                  |
|                                              | Southeast Asia               | 3,666,592      | 5,302,086  | 5,292,494                       | 5,302,295                         | 44.3%                                   | 0.3%                                     | 0%                                         | 44.6%                                  |

| Location                    | New cases, No. |           | Expected new cases in 2019, No.     |                                            | new cases change cause, 1990 to 2019, %     |                                                |                                                     | % 1990 - 2019<br>new cases<br>overall change |
|-----------------------------|----------------|-----------|-------------------------------------|--------------------------------------------|---------------------------------------------|------------------------------------------------|-----------------------------------------------------|----------------------------------------------|
|                             | 1990           | 2019      | Given<br>population<br>growth alone | Given<br>population<br>growth and<br>Aging | Due to<br>Population<br>Growth <sup>a</sup> | Due to Age<br>Structure<br>Change <sup>b</sup> | Due to<br>Incidence<br>Rates<br>Change <sup>c</sup> |                                              |
| Southern Latin America      | 529,063        | 797,778   | 712,857                             | 728,750                                    | 34.7%                                       | 3%                                             | 13%                                                 | 50.8%                                        |
| Southern Sub-Saharan Africa | 511,314        | 718,466   | 765,368                             | 799,550                                    | 49.7%                                       | 6.7%                                           | -15.9%                                              | 40.5%                                        |
| Tropical Latin America      | 2,291,772      | 2,490,194 | 3,351,819                           | 3,002,106                                  | 46.3%                                       | -15.3%                                         | -22.3%                                              | 8.7%                                         |
| Western Europe              | 3,611,012      | 3,912,148 | 4,096,576                           | 4,590,023                                  | 13.4%                                       | 13.7%                                          | -18.8%                                              | 8.3%                                         |
| Western Sub-Saharan Africa  | 1,683,196      | 3,583,594 | 3,988,275                           | 3,885,285                                  | 136.9%                                      | -6.1%                                          | -17.9%                                              | 112.9%                                       |

<sup>a</sup> We estimated the effect of population growth by applying the population size of 2019 onto the rate, sex, and age structure of 1990. In this hypothetical scenario, incidence of chronic respiratory diseases rose by 44.6% as the global population grew by 44.6% between 1990 and 2019, and incidence rates and age structure remained the same as in 1990.

<sup>b</sup> We estimated the effect of aging by applying the age structure of 2019 onto the rate, sex distribution, and population size of 1990. Globally, 13.4% of the change in incident cases between 1990 and 2019 can be attributed to the changing age structure of the population.

<sup>c</sup> We estimated the effect of changing incidence rate by applying the incidence rate for 1990 onto the population size and age structure of 2019. Globally, the change in incidence cases reported herein represents the proportion of the change in incident cases between 1990 and 2019 that is due to a change in incidence rates.

**Table S4. Age-standardised rate of incidence, prevalence, deaths, DALYs, YLLs, and YLDs from sub-causes of pneumoconiosis by SDI, by sex and for both**

**sexes combined**

| Location | Measure    | Year      | Sex    | Pneumoconiosis         |                       |                             |                        |
|----------|------------|-----------|--------|------------------------|-----------------------|-----------------------------|------------------------|
|          |            |           |        | Silicosis              | Asbestosis            | Coal workers pneumoconiosis | Other pneumoconiosis   |
| Global   | Incidence  | % Change* | Both   | -11.5 (-22.6 to -1)    | -7.9 (-13.7 to -0.8)  | -48.4 (-52.6 to -44.5)      | -18.1 (-24 to -12.7)   |
|          |            |           | Female | -9.1 (-15.6 to -3.1)   | 27.2 (19.3 to 37.3)   | -35.1 (-42.1 to -28.6)      | -19.4 (-25.5 to -13.4) |
|          |            |           | Male   | -11.2 (-22.7 to -0.3)  | -25.9 (-33.4 to -17)  | -49.7 (-53.8 to -45.7)      | -17.7 (-23.8 to -11.5) |
|          |            | 2019      | Both   | 1.7 (1.4 to 2)         | 0.4 (0.3 to 0.5)      | 0.1 (0.1 to 0.1)            | 0.2 (0.2 to 0.3)       |
|          |            |           | Female | 0.2 (0.1 to 0.2)       | 0.4 (0.3 to 0.5)      | 0 (0 to 0)                  | 0.1 (0.1 to 0.1)       |
|          |            |           | Male   | 3.2 (2.6 to 3.8)       | 0.5 (0.4 to 0.6)      | 0.2 (0.1 to 0.2)            | 0.3 (0.2 to 0.4)       |
|          | Prevalence | % Change  | Both   | -4.6 (-17.8 to 6.3)    | 5.9 (-2.8 to 15.2)    | -49 (-52.9 to -44.9)        | -17.5 (-22.9 to -12.9) |
|          |            |           | Female | -4.9 (-12 to 1.9)      | 36.2 (23.8 to 49)     | -29.5 (-36.4 to -22.1)      | -20.1 (-26 to -14.3)   |
|          |            |           | Male   | -5.4 (-18.7 to 5.8)    | -6.9 (-16.4 to 4)     | -51.8 (-55.5 to -47.6)      | -18.2 (-23.8 to -12.8) |
|          |            | 2019      | Both   | 31.6 (26.1 to 37.9)    | 1 (0.8 to 1.2)        | 1.3 (1 to 1.6)              | 2.9 (2.4 to 3.6)       |
|          |            |           | Female | 2.6 (2 to 3.3)         | 0.8 (0.6 to 1)        | 0.4 (0.3 to 0.5)            | 1.5 (1.2 to 1.9)       |
|          |            |           | Male   | 63.2 (52.1 to 76)      | 1.3 (1 to 1.5)        | 2.3 (1.8 to 2.8)            | 4.6 (3.7 to 5.7)       |
|          | Deaths     | % Change  | Both   | -58.9 (-67.9 to -39.4) | 15.6 (-8.5 to 33.6)   | -68.8 (-75.1 to -54)        | -34.3 (-48.1 to -9.6)  |
|          |            |           | Female | -36.2 (-63.2 to -14.3) | -17.4 (-35.2 to 6.8)  | -46.8 (-62.2 to -20.8)      | -22.4 (-46.9 to -3.4)  |
|          |            |           | Male   | -60.3 (-69.1 to -41.1) | 22.7 (-7.6 to 44.4)   | -70.9 (-76.9 to -56.8)      | -37.6 (-51.8 to -7.3)  |
|          |            | 2019      | Both   | 0.2 (0.1 to 0.2)       | 0 (0 to 0.1)          | 0 (0 to 0)                  | 0 (0 to 0.1)           |
|          |            |           | Female | 0 (0 to 0)             | 0 (0 to 0)            | 0 (0 to 0)                  | 0 (0 to 0)             |
|          |            |           | Male   | 0.3 (0.3 to 0.4)       | 0.1 (0.1 to 0.1)      | 0.1 (0.1 to 0.1)            | 0.1 (0.1 to 0.1)       |
|          | DALYs      | % Change  | Both   | -43.3 (-54.2 to -27.1) | -6.1 (-18.3 to 5.9)   | -68.3 (-75.1 to -54.3)      | -36.2 (-48 to -17.5)   |
|          |            |           | Female | -24.8 (-45.9 to -11.2) | -12.9 (-29.2 to 11.8) | -48.7 (-63 to -29.6)        | -28.3 (-47.5 to -15.2) |
|          |            |           | Male   | -44.8 (-55.7 to -28.8) | -3.5 (-18.6 to 11.8)  | -70.3 (-76.9 to -56.7)      | -38.5 (-51.3 to -15.2) |
|          |            | 2019      | Both   | 7.9 (6.2 to 10)        | 0.9 (0.7 to 1)        | 0.9 (0.7 to 1.2)            | 1.4 (1.1 to 1.8)       |
|          |            |           | Female | 0.6 (0.5 to 0.8)       | 0.3 (0.2 to 0.4)      | 0.2 (0.1 to 0.2)            | 0.6 (0.5 to 0.8)       |
|          |            |           | Male   | 15.9 (12.6 to 20.1)    | 1.6 (1.2 to 1.9)      | 1.8 (1.3 to 2.3)            | 2.3 (1.8 to 3.1)       |
|          | YLLs       | % Change  | Both   | -63 (-72 to -43.9)     | -7.7 (-21 to 6.3)     | -71.5 (-78.5 to -55)        | -42.1 (-54.8 to -18.2) |
|          |            |           | Female | -44.5 (-69 to -21.6)   | -28.6 (-44.8 to -1.6) | -56.3 (-69.4 to -30.9)      | -32.6 (-56.4 to -13.6) |
|          |            |           | Male   | -63.9 (-72.8 to -44.6) | -2.5 (-18.7 to 15.5)  | -73 (-79.6 to -57.4)        | -44.2 (-57.4 to -14.6) |
|          |            | 2019      | Both   | 3.4 (2.8 to 4.2)       | 0.7 (0.5 to 0.9)      | 0.7 (0.5 to 1)              | 1 (0.8 to 1.3)         |
|          |            |           | Female | 0.2 (0.2 to 0.3)       | 0.2 (0.1 to 0.2)      | 0.1 (0.1 to 0.2)            | 0.4 (0.3 to 0.5)       |
|          |            |           | Male   | 7 (5.7 to 8.7)         | 1.5 (1 to 1.7)        | 1.4 (1 to 2)                | 1.7 (1.2 to 2.4)       |
|          | YLDs       | % Change  | Both   | -4.9 (-17.9 to 6.7)    | 3.1 (-5 to 12.8)      | -47.2 (-51.8 to -42.2)      | -16.8 (-22.4 to -11.8) |
|          |            |           | Female | -3.2 (-11.8 to 5.1)    | 34.6 (22.1 to 47.8)   | -29.2 (-39.1 to -16.9)      | -19.6 (-26.4 to -12.3) |
|          |            |           | Male   | -5.6 (-18.6 to 6.3)    | -10.8 (-20.2 to 0.1)  | -49.9 (-54.7 to -44.7)      | -17.3 (-23.3 to -11.5) |
|          |            | 2019      | Both   | 4.5 (3 to 6.4)         | 0.1 (0.1 to 0.2)      | 0.2 (0.1 to 0.3)            | 0.4 (0.3 to 0.6)       |

| Location | Measure    | Year     | Sex    | Pneumoconiosis         |                        |                             |                        |
|----------|------------|----------|--------|------------------------|------------------------|-----------------------------|------------------------|
|          |            |          |        | Silicosis              | Asbestosis             | Coal workers pneumoconiosis | Other pneumoconiosis   |
|          |            |          | Female | 0.4 (0.2 to 0.6)       | 0.1 (0.1 to 0.2)       | 0.1 (0 to 0.1)              | 0.2 (0.1 to 0.3)       |
| High SDI | Incidence  | % Change | Male   | 8.9 (5.9 to 12.8)      | 0.2 (0.1 to 0.3)       | 0.4 (0.2 to 0.5)            | 0.7 (0.4 to 1)         |
|          |            |          | Both   | -31.8 (-43.8 to -19.2) | -6.5 (-16.3 to 4.7)    | -40.1 (-43.5 to -36.2)      | -32.8 (-41 to -24)     |
|          |            |          | Female | -8.4 (-23.3 to 6)      | -39.7 (-49.8 to -26.4) | -17.6 (-27.7 to -5.3)       | -7.7 (-16.5 to 0.7)    |
|          |            | 2019     | Male   | -36.5 (-47.2 to -24.6) | 2.2 (-7.3 to 12.7)     | -45.2 (-48.5 to -41.5)      | -37.5 (-45.3 to -28.7) |
|          |            |          | Both   | 0.4 (0.4 to 0.5)       | 0.7 (0.6 to 0.9)       | 0.1 (0.1 to 0.1)            | 0.2 (0.1 to 0.2)       |
|          |            |          | Female | 0 (0 to 0)             | 0.3 (0.2 to 0.3)       | 0 (0 to 0)                  | 0 (0 to 0.1)           |
|          |            |          | Male   | 0.8 (0.7 to 1)         | 1.3 (1 to 1.6)         | 0.2 (0.1 to 0.2)            | 0.3 (0.3 to 0.4)       |
|          | Prevalence | % Change | Both   | -24.9 (-41.7 to -11)   | 14.3 (1 to 29.6)       | -42 (-46.5 to -37.5)        | -30.7 (-39.3 to -22.7) |
|          |            |          | Female | -7.8 (-25.4 to 8.2)    | -42 (-52.1 to -28.3)   | -17 (-25.8 to -5.6)         | -10.3 (-19.7 to -1.3)  |
|          |            |          | Male   | -32.5 (-47.1 to -19.5) | 23.4 (10.3 to 37.9)    | -48.4 (-52.5 to -44.1)      | -37.8 (-45.3 to -30.1) |
|          |            | 2019     | Both   | 5.8 (4.9 to 6.9)       | 1.9 (1.5 to 2.3)       | 0.9 (0.7 to 1)              | 2.4 (2 to 3.1)         |
|          |            |          | Female | 0.4 (0.3 to 0.5)       | 0.4 (0.3 to 0.6)       | 0.2 (0.1 to 0.2)            | 0.8 (0.6 to 1)         |
|          |            |          | Male   | 12 (10.2 to 14.2)      | 3.7 (3 to 4.6)         | 1.7 (1.4 to 2)              | 4.6 (3.6 to 5.8)       |
|          | Deaths     | % Change | Both   | -66.2 (-72.1 to -50.1) | 55.4 (-1.3 to 75.8)    | -71 (-74.7 to -66.2)        | -45.2 (-57.5 to 21.9)  |
|          |            |          | Female | -29.4 (-48.8 to 24.8)  | 16.7 (-35.5 to 53.7)   | 0 (-23.5 to 27)             | -1.8 (-18.9 to 22.1)   |
|          |            |          | Male   | -68.9 (-74.3 to -53.9) | 48 (-8.5 to 68.8)      | -74.2 (-77.5 to -70)        | -48.7 (-60.6 to 20.7)  |
|          |            | 2019     | Both   | 0.1 (0.1 to 0.1)       | 0.1 (0.1 to 0.1)       | 0.1 (0 to 0.1)              | 0 (0 to 0)             |
|          |            |          | Female | 0 (0 to 0)             | 0 (0 to 0)             | 0 (0 to 0)                  | 0 (0 to 0)             |
|          |            |          | Male   | 0.2 (0.1 to 0.3)       | 0.2 (0.2 to 0.3)       | 0.1 (0.1 to 0.2)            | 0.1 (0 to 0.1)         |
|          | DALYs      | % Change | Both   | -63.8 (-69.3 to -54.6) | 20.3 (-8.1 to 33.3)    | -73.4 (-76.9 to -68.9)      | -50 (-58.8 to -13.4)   |
|          |            |          | Female | -24.7 (-38.6 to 10.5)  | -18.1 (-40.5 to 0.3)   | -15.7 (-34.5 to 0.7)        | -10 (-19.8 to 0)       |
|          |            |          | Male   | -67.1 (-72.1 to -58.2) | 18.1 (-12.6 to 31.6)   | -76.1 (-79.2 to -72.1)      | -54.8 (-63 to -18.2)   |
|          |            | 2019     | Both   | 2 (1.6 to 2.8)         | 1.8 (1.3 to 2)         | 1.1 (0.8 to 1.2)            | 0.8 (0.7 to 1.1)       |
|          |            |          | Female | 0.2 (0.1 to 0.3)       | 0.2 (0.1 to 0.3)       | 0.1 (0.1 to 0.1)            | 0.2 (0.2 to 0.3)       |
|          |            |          | Male   | 4.2 (3.4 to 6)         | 3.8 (2.7 to 4.2)       | 2.3 (1.8 to 2.6)            | 1.5 (1.2 to 2.1)       |
|          | YLLs       | % Change | Both   | -73.8 (-78.2 to -61.6) | 22.4 (-13.3 to 37.7)   | -75.4 (-78.9 to -70.7)      | -59 (-68.8 to -4.7)    |
|          |            |          | Female | -30.5 (-46.8 to 18.8)  | -2.3 (-38.7 to 23.8)   | -15.1 (-42.7 to 11.3)       | -10.7 (-27.5 to 6.8)   |
|          |            |          | Male   | -75.9 (-79.9 to -64.3) | 18.1 (-17.6 to 33.5)   | -77.7 (-80.8 to -73.5)      | -62.7 (-72.1 to -5.9)  |
|          |            | 2019     | Both   | 1.1 (0.9 to 2)         | 1.5 (1 to 1.7)         | 1 (0.7 to 1.1)              | 0.5 (0.4 to 0.7)       |
|          |            |          | Female | 0.1 (0.1 to 0.2)       | 0.2 (0.1 to 0.2)       | 0.1 (0 to 0.1)              | 0.1 (0.1 to 0.2)       |
|          |            |          | Male   | 2.5 (2 to 4.3)         | 3.2 (2.2 to 3.6)       | 2.1 (1.5 to 2.4)            | 0.9 (0.7 to 1.5)       |
|          | YLDs       | % Change | Both   | -23.8 (-41.8 to -8)    | 9.4 (-3.6 to 24.5)     | -40.2 (-45.6 to -34.1)      | -29.5 (-38 to -21.5)   |
|          |            |          | Female | -8.6 (-27.1 to 8.9)    | -41.8 (-51.9 to -28.1) | -16.9 (-25.7 to -5.5)       | -9.4 (-19 to 0.1)      |
|          |            |          | Male   | -31.2 (-46.8 to -16.7) | 18.5 (4.9 to 33.5)     | -46.7 (-51.7 to -40.8)      | -36.8 (-44.7 to -28.6) |
|          |            | 2019     | Both   | 0.8 (0.6 to 1.2)       | 0.3 (0.2 to 0.4)       | 0.1 (0.1 to 0.2)            | 0.4 (0.2 to 0.5)       |
|          |            |          | Female | 0.1 (0 to 0.1)         | 0.1 (0 to 0.1)         | 0 (0 to 0)                  | 0.1 (0.1 to 0.2)       |

| Location        | Measure    | Year     | Sex    | Pneumoconiosis         |                        |                             |                        |
|-----------------|------------|----------|--------|------------------------|------------------------|-----------------------------|------------------------|
|                 |            |          |        | Silicosis              | Asbestosis             | Coal workers pneumoconiosis | Other pneumoconiosis   |
| High-middle SDI | Incidence  | % Change | Male   | 1.7 (1.2 to 2.4)       | 0.5 (0.4 to 0.8)       | 0.3 (0.2 to 0.4)            | 0.7 (0.4 to 1)         |
|                 |            |          | Both   | -6.1 (-19.4 to 5.6)    | -23.4 (-31.8 to -14.4) | -44.1 (-49.6 to -37.9)      | -10.6 (-18.3 to -5.2)  |
|                 |            |          | Female | 4.5 (-3.4 to 12.7)     | 1.7 (-6.3 to 9.5)      | -22.9 (-34.5 to -11.1)      | -17.8 (-25 to -11.3)   |
|                 |            | 2019     | Male   | -7.6 (-20.5 to 4.2)    | -38.8 (-47.8 to -28.6) | -45.7 (-51 to -39.9)        | -8.8 (-18.8 to -2.4)   |
|                 |            |          | Both   | 2.5 (2.1 to 3)         | 0.3 (0.2 to 0.4)       | 0.1 (0.1 to 0.1)            | 0.2 (0.2 to 0.3)       |
|                 |            |          | Female | 0.2 (0.2 to 0.3)       | 0.3 (0.2 to 0.4)       | 0 (0 to 0)                  | 0.1 (0.1 to 0.2)       |
|                 |            | 2019     | Male   | 4.9 (4 to 5.9)         | 0.3 (0.3 to 0.4)       | 0.2 (0.2 to 0.3)            | 0.4 (0.3 to 0.4)       |
|                 | Prevalence | % Change | Both   | -2.5 (-16.8 to 9.9)    | -17.6 (-26.2 to -8.2)  | -45 (-50.9 to -39.4)        | -8.8 (-16.1 to -3.1)   |
|                 |            |          | Female | 9.2 (-0.5 to 20.3)     | 5.9 (-3.5 to 15)       | -18.9 (-32 to -5.3)         | -15.8 (-23.4 to -8.2)  |
|                 |            |          | Male   | -6.6 (-20.3 to 5.3)    | -33.6 (-43.8 to -22.2) | -48 (-53.8 to -42.6)        | -9.6 (-19.5 to -2.8)   |
|                 |            | 2019     | Both   | 45.8 (37.8 to 55.3)    | 0.6 (0.4 to 0.7)       | 2 (1.6 to 2.5)              | 3.2 (2.6 to 4.1)       |
|                 |            |          | Female | 3.2 (2.5 to 4.2)       | 0.6 (0.5 to 0.8)       | 0.4 (0.3 to 0.5)            | 1.6 (1.2 to 2)         |
|                 |            |          | Male   | 94.2 (77.8 to 113.6)   | 0.6 (0.4 to 0.7)       | 3.8 (3 to 4.7)              | 5.2 (4.1 to 6.6)       |
|                 | Deaths     | % Change | Both   | -66.6 (-74 to -49.3)   | -16 (-31.2 to -0.1)    | -70.1 (-79.3 to -46)        | -42 (-60.7 to -18.3)   |
|                 |            |          | Female | -42.9 (-72.6 to -17.9) | -36.9 (-52.6 to 2.5)   | -55.7 (-75.7 to -21.8)      | -36.2 (-63.7 to -17.2) |
|                 |            |          | Male   | -67.9 (-75 to -51.5)   | -1.4 (-22.8 to 24.2)   | -72.6 (-81.7 to -48.6)      | -46.5 (-63.2 to -19.2) |
|                 |            | 2019     | Both   | 0.2 (0.1 to 0.2)       | 0 (0 to 0)             | 0 (0 to 0)                  | 0 (0 to 0)             |
|                 |            |          | Female | 0 (0 to 0)             | 0 (0 to 0)             | 0 (0 to 0)                  | 0 (0 to 0)             |
|                 |            |          | Male   | 0.4 (0.3 to 0.5)       | 0 (0 to 0)             | 0.1 (0 to 0.1)              | 0 (0 to 0.1)           |
|                 | DALYs      | % Change | Both   | -44 (-54.5 to -31)     | -30.9 (-42.5 to -13.3) | -66 (-75.2 to -47.5)        | -35.3 (-50.9 to -16.9) |
|                 |            |          | Female | -20.7 (-44.6 to -3.7)  | -32.9 (-48.5 to 0.8)   | -52 (-70.7 to -26.2)        | -35 (-55.3 to -22.6)   |
|                 |            |          | Male   | -47.4 (-57.5 to -34.9) | -27.8 (-41.1 to -10.5) | -68.5 (-77.3 to -50.5)      | -37.4 (-53.8 to -15.3) |
|                 |            | 2019     | Both   | 9.5 (7.1 to 12.4)      | 0.4 (0.4 to 0.5)       | 0.9 (0.6 to 1.1)            | 1.1 (0.9 to 1.4)       |
|                 |            |          | Female | 0.7 (0.5 to 1)         | 0.3 (0.2 to 0.3)       | 0.1 (0.1 to 0.2)            | 0.5 (0.4 to 0.6)       |
|                 |            |          | Male   | 19.8 (15 to 25.7)      | 0.7 (0.5 to 0.8)       | 1.7 (1.3 to 2.3)            | 1.8 (1.5 to 2.4)       |
|                 | YLLs       | % Change | Both   | -70.8 (-78.2 to -53.8) | -33.8 (-47 to -12.2)   | -72.2 (-81.7 to -49.3)      | -47.4 (-65.2 to -22)   |
|                 |            |          | Female | -50.1 (-76.8 to -24.8) | -44.5 (-61.1 to -1.2)  | -63.6 (-82 to -31.3)        | -46.4 (-71.6 to -28.4) |
|                 |            |          | Male   | -72.3 (-79.3 to -55.9) | -26.8 (-42 to -6.3)    | -74 (-83.3 to -52.4)        | -49.3 (-66.2 to -19.6) |
|                 |            | 2019     | Both   | 3 (2.4 to 4.7)         | 0.3 (0.3 to 0.4)       | 0.6 (0.4 to 0.8)            | 0.6 (0.5 to 0.9)       |
|                 |            |          | Female | 0.2 (0.1 to 0.3)       | 0.2 (0.1 to 0.2)       | 0.1 (0 to 0.1)              | 0.3 (0.2 to 0.3)       |
|                 |            |          | Male   | 6.5 (5.3 to 10.1)      | 0.6 (0.5 to 0.7)       | 1.1 (0.7 to 1.6)            | 1 (0.8 to 1.5)         |
|                 | YLDs       | % Change | Both   | -2.5 (-17.2 to 11.3)   | -17.9 (-26.6 to -8.4)  | -43.3 (-50.8 to -35.4)      | -8.3 (-15.7 to -1.6)   |
|                 |            |          | Female | 12.3 (-2.4 to 28.5)    | 5.1 (-4.4 to 14.6)     | -18 (-31.5 to -4)           | -16 (-23.9 to -8.3)    |
|                 |            |          | Male   | -6.4 (-20.6 to 7)      | -33.6 (-43.9 to -22.1) | -46.3 (-53.8 to -38.7)      | -8.4 (-17.8 to 0.4)    |
|                 |            | 2019     | Both   | 6.5 (4.3 to 9.3)       | 0.1 (0.1 to 0.1)       | 0.3 (0.2 to 0.4)            | 0.5 (0.3 to 0.7)       |
|                 |            |          | Female | 0.5 (0.3 to 0.7)       | 0.1 (0.1 to 0.1)       | 0.1 (0 to 0.1)              | 0.2 (0.2 to 0.4)       |

| Location   | Measure    | Year     | Sex    | Pneumoconiosis         |                        |                             |                        |
|------------|------------|----------|--------|------------------------|------------------------|-----------------------------|------------------------|
|            |            |          |        | Silicosis              | Asbestosis             | Coal workers pneumoconiosis | Other pneumoconiosis   |
| Middle SDI | Incidence  | % Change | Male   | 13.3 (8.8 to 19.1)     | 0.1 (0.1 to 0.1)       | 0.6 (0.4 to 0.9)            | 0.8 (0.5 to 1.1)       |
|            |            |          | Both   | -32.3 (-41.4 to -24.2) | -9.5 (-18.2 to 1.2)    | -62.7 (-66.9 to -58.8)      | -31 (-35.6 to -25.8)   |
|            |            |          | Female | -25.7 (-32.5 to -19.7) | 75.2 (61 to 91.1)      | -46.7 (-53.9 to -39.3)      | -34.8 (-40.6 to -28.8) |
|            |            |          | Male   | -30.9 (-40.8 to -21.9) | -64.9 (-71.2 to -56.6) | -64.9 (-69.2 to -60.7)      | -27.9 (-33.2 to -22.2) |
|            |            | 2019     | Both   | 2 (1.6 to 2.4)         | 0.3 (0.3 to 0.4)       | 0.1 (0.1 to 0.1)            | 0.2 (0.2 to 0.3)       |
|            |            |          | Female | 0.3 (0.2 to 0.3)       | 0.5 (0.4 to 0.6)       | 0 (0 to 0.1)                | 0.1 (0.1 to 0.2)       |
|            |            |          | Male   | 3.8 (3.1 to 4.5)       | 0.2 (0.1 to 0.2)       | 0.1 (0.1 to 0.2)            | 0.3 (0.2 to 0.4)       |
|            | Prevalence | % Change | Both   | -11.3 (-23.5 to 0.2)   | 15 (3.1 to 29.4)       | -55.6 (-60.5 to -51.1)      | -21.7 (-26.5 to -16.5) |
|            |            |          | Female | -24.8 (-31.4 to -18.2) | 101.4 (85.6 to 119.2)  | -41.6 (-49.7 to -33.5)      | -35.9 (-41.8 to -29.8) |
|            |            |          | Male   | -8.3 (-21.2 to 4.1)    | -57.8 (-65.8 to -47.8) | -57.8 (-62.9 to -52.6)      | -11.5 (-16.9 to -5)    |
|            |            | 2019     | Both   | 52.1 (42.6 to 63.1)    | 0.7 (0.5 to 0.9)       | 1.8 (1.4 to 2.2)            | 3.9 (3.1 to 4.9)       |
|            |            |          | Female | 4 (3.1 to 5.1)         | 1.1 (0.8 to 1.4)       | 0.8 (0.6 to 1)              | 2.4 (1.9 to 3)         |
|            |            |          | Male   | 103.9 (84.9 to 126.1)  | 0.3 (0.2 to 0.4)       | 2.7 (2.2 to 3.4)            | 5.5 (4.3 to 6.9)       |
|            | Deaths     | % Change | Both   | -58.2 (-71.8 to -24.7) | -29 (-46.1 to -7.1)    | -65.2 (-79.3 to -21.3)      | -38.7 (-57.9 to -8)    |
|            |            |          | Female | -47.6 (-77.9 to -16.4) | -43.5 (-59.9 to -7.7)  | -69.3 (-81.9 to -42.6)      | -41.7 (-66.7 to -17.2) |
|            |            |          | Male   | -58 (-72.3 to -22.1)   | -22.3 (-43.9 to 15.1)  | -64.4 (-79.6 to -14.2)      | -37 (-58.3 to 8.8)     |
|            |            | 2019     | Both   | 0.2 (0.2 to 0.3)       | 0 (0 to 0)             | 0 (0 to 0.1)                | 0 (0 to 0.1)           |
|            |            |          | Female | 0 (0 to 0)             | 0 (0 to 0)             | 0 (0 to 0)                  | 0 (0 to 0)             |
|            |            |          | Male   | 0.5 (0.4 to 0.6)       | 0 (0 to 0)             | 0.1 (0 to 0.1)              | 0.1 (0.1 to 0.1)       |
|            | DALYs      | % Change | Both   | -43.5 (-56.8 to -22.7) | -25.7 (-43.9 to -4.4)  | -65.8 (-78 to -37.1)        | -40.2 (-57.6 to -18)   |
|            |            |          | Female | -39.9 (-61.5 to -24.1) | -15.9 (-40 to 29.5)    | -62.1 (-77.8 to -43.6)      | -44.9 (-64.2 to -31)   |
|            |            |          | Male   | -42.5 (-56.5 to -19.7) | -29.2 (-49.7 to 3)     | -65.7 (-79 to -32.2)        | -37.3 (-57.6 to -2.9)  |
|            |            | 2019     | Both   | 12.5 (9.7 to 16.1)     | 0.5 (0.4 to 0.6)       | 1 (0.7 to 1.5)              | 1.6 (1.3 to 2.2)       |
|            |            |          | Female | 0.9 (0.7 to 1.2)       | 0.3 (0.2 to 0.4)       | 0.2 (0.2 to 0.3)            | 0.8 (0.6 to 1)         |
|            |            |          | Male   | 25 (19.5 to 32.2)      | 0.6 (0.5 to 0.9)       | 1.8 (1.2 to 2.9)            | 2.5 (2 to 3.6)         |
|            | YLLs       | % Change | Both   | -62.7 (-75.7 to -33.6) | -32.7 (-50.8 to -8.6)  | -69 (-82.1 to -27.3)        | -47.1 (-65.8 to -15.7) |
|            |            |          | Female | -56.7 (-81.7 to -28)   | -48.3 (-65.9 to -10.2) | -74.2 (-85.6 to -49.5)      | -51.5 (-74.1 to -28.8) |
|            |            |          | Male   | -62.1 (-75.7 to -31.3) | -25.4 (-48.7 to 13.9)  | -68 (-82.3 to -20.4)        | -44.8 (-65.4 to 0.8)   |
|            |            | 2019     | Both   | 5.1 (4 to 6.7)         | 0.4 (0.3 to 0.5)       | 0.7 (0.4 to 1.2)            | 1 (0.8 to 1.6)         |
|            |            |          | Female | 0.3 (0.2 to 0.4)       | 0.2 (0.1 to 0.2)       | 0.1 (0.1 to 0.1)            | 0.4 (0.3 to 0.5)       |
|            |            |          | Male   | 10.4 (7.9 to 13.7)     | 0.6 (0.4 to 0.8)       | 1.3 (0.8 to 2.5)            | 1.7 (1.3 to 2.8)       |
|            | YLDs       | % Change | Both   | -11.8 (-24.2 to 0)     | 13.5 (1.2 to 28.5)     | -53.8 (-59.9 to -47.5)      | -21.7 (-27.8 to -14.8) |
|            |            |          | Female | -23.1 (-32.8 to -12)   | 101.6 (84.4 to 122.7)  | -41.5 (-54.3 to -24.9)      | -35.2 (-43.5 to -25)   |
|            |            |          | Male   | -8.9 (-21.8 to 3.8)    | -57.5 (-65.5 to -47.6) | -55.6 (-62.1 to -48.5)      | -11.8 (-19.9 to -2.8)  |
|            |            | 2019     | Both   | 7.4 (4.8 to 10.7)      | 0.1 (0.1 to 0.2)       | 0.3 (0.2 to 0.4)            | 0.6 (0.4 to 0.8)       |
|            |            |          | Female | 0.6 (0.4 to 0.9)       | 0.2 (0.1 to 0.2)       | 0.1 (0.1 to 0.2)            | 0.4 (0.2 to 0.5)       |

| Location       | Measure    | Year     | Sex    | Pneumoconiosis         |                        |                             |                       |
|----------------|------------|----------|--------|------------------------|------------------------|-----------------------------|-----------------------|
|                |            |          |        | Silicosis              | Asbestosis             | Coal workers pneumoconiosis | Other pneumoconiosis  |
| Low-middle SDI | Incidence  | % Change | Male   | 14.6 (9.6 to 21.2)     | 0 (0 to 0.1)           | 0.4 (0.3 to 0.6)            | 0.8 (0.5 to 1.2)      |
|                |            |          | Both   | -8.4 (-15.6 to -0.9)   | 23.4 (15.6 to 31.9)    | -37.3 (-43.1 to -32.2)      | 2.9 (-1.2 to 7)       |
|                |            |          | Female | -12 (-18.7 to -5.4)    | 81.8 (59.8 to 109.4)   | -31.7 (-42.7 to -16.2)      | 12.8 (4.3 to 20.5)    |
|                |            | 2019     | Male   | -5 (-13.1 to 3.6)      | -44.8 (-51.7 to -37)   | -35.2 (-41.9 to -29.6)      | 1.7 (-2.5 to 6.2)     |
|                |            |          | Both   | 0.8 (0.7 to 1)         | 0.3 (0.3 to 0.4)       | 0 (0 to 0.1)                | 0.2 (0.1 to 0.2)      |
|                |            |          | Female | 0.1 (0.1 to 0.2)       | 0.5 (0.4 to 0.7)       | 0 (0 to 0)                  | 0.1 (0.1 to 0.1)      |
|                |            | 2019     | Male   | 1.5 (1.3 to 1.9)       | 0.1 (0.1 to 0.2)       | 0.1 (0.1 to 0.1)            | 0.2 (0.2 to 0.3)      |
|                | Prevalence | % Change | Both   | -3.5 (-12.5 to 4.3)    | 32.2 (22.3 to 42.5)    | -42.8 (-49.7 to -36.1)      | 4.5 (0 to 9.5)        |
|                |            |          | Female | -12.2 (-18.8 to -4.7)  | 97.9 (75.9 to 125.7)   | -32.6 (-44.6 to -17.7)      | 9 (0.9 to 16.8)       |
|                |            |          | Male   | 1.9 (-8.5 to 10.9)     | -43.3 (-50.7 to -35.3) | -42.3 (-50.1 to -34.3)      | 5.7 (0.5 to 11.4)     |
|                |            | 2019     | Both   | 15.5 (12.9 to 18.4)    | 0.5 (0.4 to 0.6)       | 0.5 (0.4 to 0.6)            | 1.8 (1.5 to 2.2)      |
|                |            |          | Female | 2.6 (2.1 to 3.4)       | 0.8 (0.6 to 1)         | 0.2 (0.1 to 0.2)            | 1.1 (0.9 to 1.4)      |
|                |            |          | Male   | 29.2 (24.3 to 34.9)    | 0.2 (0.2 to 0.3)       | 0.8 (0.7 to 1)              | 2.6 (2.1 to 3.2)      |
|                | Deaths     | % Change | Both   | -51.9 (-63.5 to -13)   | -7 (-32.1 to 43.9)     | -58.8 (-71.4 to -26.5)      | -32.1 (-51.6 to 15.2) |
|                |            |          | Female | -17.2 (-49 to 24.4)    | -2.4 (-31.3 to 51.9)   | -41.6 (-60.5 to -7.3)       | -17.3 (-40.1 to 13.6) |
|                |            |          | Male   | -50 (-62.5 to -6.7)    | -5.1 (-34.9 to 85.5)   | -58.7 (-72.7 to -20.3)      | -32.6 (-53.5 to 40.6) |
|                |            | 2019     | Both   | 0.2 (0.1 to 0.2)       | 0 (0 to 0)             | 0 (0 to 0)                  | 0.1 (0.1 to 0.1)      |
|                |            |          | Female | 0 (0 to 0)             | 0 (0 to 0)             | 0 (0 to 0)                  | 0 (0 to 0)            |
|                |            |          | Male   | 0.3 (0.2 to 0.5)       | 0 (0 to 0.1)           | 0.1 (0 to 0.1)              | 0.1 (0.1 to 0.2)      |
|                | DALYs      | % Change | Both   | -43.8 (-56.5 to -15.2) | -8.2 (-31.8 to 34.1)   | -60.6 (-72.4 to -33.9)      | -33 (-50.8 to 6.8)    |
|                |            |          | Female | -17.5 (-37 to -2.4)    | 9.3 (-20.2 to 60.6)    | -47.8 (-63.9 to -19.2)      | -19.6 (-39.1 to 4.2)  |
|                |            |          | Male   | -42.2 (-55.5 to -10.3) | -11.4 (-37.6 to 56.4)  | -60.3 (-72.9 to -27.9)      | -33.3 (-53.1 to 24.3) |
|                |            | 2019     | Both   | 6 (4.5 to 7.5)         | 0.6 (0.4 to 0.8)       | 0.7 (0.4 to 1)              | 2 (1.3 to 2.9)        |
|                |            |          | Female | 0.7 (0.5 to 0.9)       | 0.4 (0.2 to 0.5)       | 0.2 (0.1 to 0.3)            | 0.8 (0.6 to 1.1)      |
|                |            |          | Male   | 11.7 (8.7 to 14.7)     | 0.9 (0.5 to 1.3)       | 1.3 (0.7 to 1.9)            | 3.2 (1.9 to 5)        |
|                | YLLs       | % Change | Both   | -54.9 (-65.8 to -20.8) | -12.2 (-35.9 to 34.6)  | -62.1 (-74.1 to -32.9)      | -36.7 (-53.8 to 6.8)  |
|                |            |          | Female | -25.1 (-54.9 to 13.4)  | -11.1 (-37.1 to 41.8)  | -49.5 (-65.3 to -16.8)      | -24.8 (-45.7 to 3.2)  |
|                |            |          | Male   | -53.3 (-64.9 to -15.9) | -9.5 (-37.6 to 68.6)   | -61.7 (-74.4 to -26.7)      | -36.6 (-55.6 to 28.1) |
|                |            | 2019     | Both   | 3.7 (2.5 to 4.9)       | 0.5 (0.3 to 0.7)       | 0.6 (0.3 to 0.9)            | 1.7 (1 to 2.6)        |
|                |            |          | Female | 0.3 (0.2 to 0.4)       | 0.2 (0.1 to 0.4)       | 0.2 (0.1 to 0.3)            | 0.6 (0.4 to 0.9)      |
|                |            |          | Male   | 7.5 (4.9 to 10)        | 0.8 (0.4 to 1.3)       | 1.2 (0.6 to 1.7)            | 2.8 (1.5 to 4.6)      |
|                | YLDs       | % Change | Both   | -3.6 (-13.8 to 6.6)    | 31.9 (22.2 to 41.9)    | -41.2 (-49.4 to -31.8)      | 4 (-2 to 10.1)        |
|                |            |          | Female | -11.8 (-19.7 to -2.8)  | 97.5 (75.3 to 125.6)   | -32.3 (-44.2 to -17.6)      | 8 (-0.1 to 15.6)      |
|                |            |          | Male   | 1.7 (-10.2 to 13.5)    | -42.8 (-50.1 to -34.8) | -40.4 (-50.1 to -29.4)      | 5.2 (-2.5 to 12.8)    |
|                |            | 2019     | Both   | 2.2 (1.5 to 3.1)       | 0.1 (0.1 to 0.1)       | 0.1 (0 to 0.1)              | 0.3 (0.2 to 0.4)      |
|                |            |          | Female | 0.4 (0.3 to 0.6)       | 0.1 (0.1 to 0.2)       | 0 (0 to 0)                  | 0.2 (0.1 to 0.2)      |
|                |            |          | Male   | 4.1 (2.8 to 5.9)       | 0 (0 to 0)             | 0.1 (0.1 to 0.2)            | 0.4 (0.3 to 0.6)      |

| Location | Measure    | Year     | Sex    | Pneumoconiosis         |                        |                             |                       |
|----------|------------|----------|--------|------------------------|------------------------|-----------------------------|-----------------------|
|          |            |          |        | Silicosis              | Asbestosis             | Coal workers pneumoconiosis | Other pneumoconiosis  |
| Low SDI  | Incidence  | % Change | Both   | -18 (-23 to -13.7)     | -14.5 (-19.1 to -9.9)  | 1.4 (-6.9 to 11)            | 3.3 (-1.8 to 8.4)     |
|          |            |          | Female | -4.1 (-16.7 to 10.4)   | 67.5 (53.8 to 82.3)    | 29.1 (15.3 to 46)           | 16.7 (8.4 to 26)      |
|          |            |          | Male   | -18.4 (-23.4 to -13.8) | -46.5 (-50.1 to -43)   | -3.4 (-13 to 7.6)           | -3 (-9.6 to 3.9)      |
|          |            | 2019     | Both   | 0.2 (0.1 to 0.2)       | 0.4 (0.3 to 0.5)       | 0 (0 to 0)                  | 0.1 (0.1 to 0.1)      |
|          |            |          | Female | 0.1 (0 to 0.1)         | 0.4 (0.3 to 0.5)       | 0 (0 to 0)                  | 0.1 (0.1 to 0.1)      |
|          |            |          | Male   | 0.3 (0.2 to 0.3)       | 0.3 (0.3 to 0.4)       | 0 (0 to 0)                  | 0.1 (0.1 to 0.1)      |
|          | Prevalence | % Change | Both   | -5.8 (-11.8 to -0.1)   | -10.2 (-14.8 to -5.3)  | 16.2 (4.1 to 29.2)          | 19.6 (13.6 to 25.3)   |
|          |            |          | Female | 0.2 (-13.3 to 18)      | 84.8 (71.4 to 101.2)   | 24.6 (14.1 to 36.6)         | 21.7 (13.2 to 30.5)   |
|          |            |          | Male   | -5.3 (-10.9 to 0.4)    | -44.4 (-48.1 to -40.5) | 11.5 (-4.7 to 31.7)         | 19.3 (11.5 to 27.1)   |
|          |            | 2019     | Both   | 2.4 (1.9 to 3)         | 0.6 (0.5 to 0.7)       | 0.1 (0 to 0.1)              | 0.8 (0.6 to 1)        |
|          |            |          | Female | 1.3 (1 to 1.8)         | 0.6 (0.5 to 0.8)       | 0 (0 to 0.1)                | 0.7 (0.5 to 0.8)      |
|          |            |          | Male   | 3.5 (2.8 to 4.4)       | 0.5 (0.4 to 0.7)       | 0.1 (0.1 to 0.1)            | 1 (0.8 to 1.3)        |
|          | Deaths     | % Change | Both   | -39.5 (-55.9 to 7.8)   | -27 (-43.8 to 7.3)     | -49.4 (-67.2 to -15.4)      | -29.8 (-48.5 to 6.8)  |
|          |            |          | Female | 2.2 (-26.1 to 48.1)    | -6.8 (-33.2 to 57.7)   | -17.9 (-44.3 to 28.5)       | -10.9 (-32.5 to 20.2) |
|          |            |          | Male   | -38.8 (-56.2 to 12.8)  | -28.6 (-49.8 to 13.2)  | -54.8 (-70.3 to -19.6)      | -34.1 (-53 to 12.2)   |
|          |            | 2019     | Both   | 0.1 (0 to 0.2)         | 0.1 (0 to 0.1)         | 0 (0 to 0)                  | 0.1 (0 to 0.1)        |
|          |            |          | Female | 0 (0 to 0)             | 0 (0 to 0)             | 0 (0 to 0)                  | 0 (0 to 0.1)          |
|          |            |          | Male   | 0.2 (0 to 0.3)         | 0.1 (0 to 0.2)         | 0 (0 to 0.1)                | 0.1 (0 to 0.2)        |
|          | DALYs      | % Change | Both   | -38.9 (-55.4 to -0.1)  | -28.5 (-45.2 to 1.9)   | -52 (-68.5 to -20.8)        | -29.9 (-48.2 to 5.1)  |
|          |            |          | Female | 0.6 (-16.5 to 23.3)    | -2.7 (-31.3 to 64.5)   | -23.9 (-46.6 to 23.2)       | -12.1 (-32.8 to 18.3) |
|          |            |          | Male   | -39 (-55.9 to 3.7)     | -31.1 (-51.2 to 1.5)   | -56.3 (-70.7 to -24.1)      | -33.8 (-52.4 to 9)    |
|          |            | 2019     | Both   | 2.5 (1 to 4)           | 1.2 (0.5 to 2.2)       | 0.5 (0.2 to 0.7)            | 1.9 (1.1 to 2.9)      |
|          |            |          | Female | 0.5 (0.3 to 0.7)       | 0.5 (0.2 to 1)         | 0.2 (0.1 to 0.8)            | 1.1 (0.7 to 1.9)      |
|          |            |          | Male   | 4.7 (1.5 to 7.7)       | 2 (0.5 to 4.1)         | 0.7 (0.2 to 1.2)            | 2.8 (1 to 4.7)        |
|          | YLLs       | % Change | Both   | -42.3 (-58.5 to 2.2)   | -29.7 (-46.6 to 4.3)   | -52.6 (-68.9 to -21.6)      | -31.9 (-49.9 to 3.5)  |
|          |            |          | Female | 1.2 (-26.6 to 47.2)    | -12.9 (-39.1 to 50.7)  | -24.8 (-47.4 to 23.3)       | -14.6 (-35.2 to 17.2) |
|          |            |          | Male   | -41.7 (-58.5 to 5.5)   | -30.4 (-51.6 to 9.8)   | -56.7 (-71 to -24.6)        | -35.5 (-54.3 to 7.3)  |
|          |            | 2019     | Both   | 2.2 (0.6 to 3.6)       | 1.1 (0.4 to 2.1)       | 0.4 (0.2 to 0.7)            | 1.8 (1 to 2.8)        |
|          |            |          | Female | 0.2 (0.1 to 0.5)       | 0.4 (0.1 to 0.8)       | 0.2 (0.1 to 0.8)            | 1 (0.6 to 1.8)        |
|          |            |          | Male   | 4.2 (0.9 to 7.1)       | 1.9 (0.4 to 4.1)       | 0.7 (0.2 to 1.2)            | 2.6 (0.9 to 4.6)      |
|          | YLDs       | % Change | Both   | -5.1 (-13.7 to 3.5)    | -10.3 (-14.8 to -5.6)  | 16 (4.2 to 29)              | 18.9 (12.9 to 25.1)   |
|          |            |          | Female | -0.1 (-13.8 to 19.7)   | 84.3 (70.9 to 100.1)   | 24.4 (14 to 36)             | 21.6 (12.3 to 31.4)   |
|          |            |          | Male   | -4.3 (-14 to 6.2)      | -43.6 (-47.3 to -39.7) | 11.4 (-4.6 to 31.4)         | 18.4 (10.6 to 26.5)   |
|          |            | 2019     | Both   | 0.4 (0.2 to 0.5)       | 0.1 (0.1 to 0.1)       | 0 (0 to 0)                  | 0.1 (0.1 to 0.2)      |
|          |            |          | Female | 0.2 (0.1 to 0.3)       | 0.1 (0.1 to 0.1)       | 0 (0 to 0)                  | 0.1 (0.1 to 0.2)      |
|          |            |          | Male   | 0.5 (0.3 to 0.8)       | 0.1 (0.1 to 0.1)       | 0 (0 to 0)                  | 0.2 (0.1 to 0.2)      |

\* % Change (1990 to 2019). Data in parentheses are 95% Uncertainty Intervals (95% UIs)

DALYs= Disability-Adjusted Life Years; YLLs= Years of Life Lost; YLDs= Years Lived with Disability





























## Chronic obstructive pulmonary disease

[illegible]







## Chronic obstructive pulmonary disease

| 7 GB region                  | 21 GB region                 | Location | Deaths | Age              | Female                 |                        | Male                 |                        | Female                 |                         | Male                |                  | Percent change (1990 to 1985) |                 |  |
|------------------------------|------------------------------|----------|--------|------------------|------------------------|------------------------|----------------------|------------------------|------------------------|-------------------------|---------------------|------------------|-------------------------------|-----------------|--|
|                              |                              |          |        |                  | Both                   | 15 to 19               | Both                 | 15 to 19               | Both                   | 15 to 19                | Both                | 15 to 19         |                               |                 |  |
| North Africa and Middle East | North Africa and Middle East | Kuwait   | Deaths | All Ages         | 9.6 (8 to 11)          | 6.4 (4 to 7)           | 13 (10 to 15)        | 8.1 (5 to 13)          | 4.5 (3 to 6.1)         | 10.8 (8 to 13.8)        | 12.7 (10 to 16)     | 24.5 (17 to 32)  | 16.6 (16 to 18)               |                 |  |
|                              |                              | Kuwait   | Deaths | All Ages         | 1,850 (1,594 to 2,098) | 696 (585 to 806)       | 1,155 (970 to 1,328) | 6,186 (5,236 to 6,971) | 2,343 (1,955 to 2,727) | 8,884 (7,620 to 10,488) | 23,6 (19,9 to 27.8) | 236 (203 to 269) | 1,242 (1,045 to 1,438)        |                 |  |
| North Africa and Middle East | North Africa and Middle East | Kuwait   | Deaths | Age-standardized | 121 (111 to 134)       | 79 (70 to 92)          | 115 (101 to 130)     | 515 (438 to 592)       | 193 (163 to 223)       | 634 (538 to 730)        | 137 (117 to 157)    | 132 (112 to 152) | 12.7 (10.7 to 14.7)           | 16.6 (16 to 18) |  |
|                              |                              | Kuwait   | Deaths | YLLs             | 1,673 (1,428 to 1,918) | 2,488 (2,079 to 2,927) | 1,185 (974 to 1,398) | 6,186 (5,236 to 6,971) | 2,343 (1,955 to 2,727) | 8,884 (7,620 to 10,488) | 23,6 (19,9 to 27.8) | 236 (203 to 269) | 1,242 (1,045 to 1,438)        |                 |  |
| North Africa and Middle East | North Africa and Middle East | Kuwait   | Deaths | YLLs             | 1,673 (1,428 to 1,918) | 2,488 (2,079 to 2,927) | 1,185 (974 to 1,398) | 6,186 (5,236 to 6,971) | 2,343 (1,955 to 2,727) | 8,884 (7,620 to 10,488) | 23,6 (19,9 to 27.8) | 236 (203 to 269) | 1,242 (1,045 to 1,438)        |                 |  |
|                              |                              | Kuwait   | Deaths | YLLs             | 1,673 (1,428 to 1,918) | 2,488 (2,079 to 2,927) | 1,185 (974 to 1,398) | 6,186 (5,236 to 6,971) | 2,343 (1,955 to 2,727) | 8,884 (7,620 to 10,488) | 23,6 (19,9 to 27.8) | 236 (203 to 269) | 1,242 (1,045 to 1,438)        |                 |  |
| North Africa and Middle East | North Africa and Middle East | Kuwait   | Deaths | YLLs             | 1,673 (1,428 to 1,918) | 2,488 (2,079 to 2,927) | 1,185 (974 to 1,398) | 6,186 (5,236 to 6,971) | 2,343 (1,955 to 2,727) | 8,884 (7,620 to 10,488) | 23,6 (19,9 to 27.8) | 236 (203 to 269) | 1,242 (1,045 to 1,438)        |                 |  |
|                              |                              | Kuwait   | Deaths | YLLs             | 1,673 (1,428 to 1,918) | 2,488 (2,079 to 2,927) | 1,185 (974 to 1,398) | 6,186 (5,236 to 6,971) | 2,343 (1,955 to 2,727) | 8,884 (7,620 to 10,488) | 23,6 (19,9 to 27.8) | 236 (203 to 269) | 1,242 (1,045 to 1,438)        |                 |  |
| North Africa and Middle East | North Africa and Middle East | Kuwait   | Deaths | YLLs             | 1,673 (1,428 to 1,918) | 2,488 (2,079 to 2,927) | 1,185 (974 to 1,398) | 6,186 (5,236 to 6,971) | 2,343 (1,955 to 2,727) | 8,884 (7,620 to 10,488) | 23,6 (19,9 to 27.8) | 236 (203 to 269) | 1,242 (1,045 to 1,438)        |                 |  |
|                              |                              | Kuwait   | Deaths | YLLs             | 1,673 (1,428 to 1,918) | 2,488 (2,079 to 2,927) | 1,185 (974 to 1,398) | 6,186 (5,236 to 6,971) | 2,343 (1,955 to 2,727) | 8,884 (7,620 to 10,488) | 23,6 (19,9 to 27.8) | 236 (203 to 269) | 1,242 (1,045 to 1,438)        |                 |  |
| North Africa and Middle East | North Africa and Middle East | Kuwait   | Deaths | YLLs             | 1,673 (1,428 to 1,918) | 2,488 (2,079 to 2,927) | 1,185 (974 to 1,398) | 6,186 (5,236 to 6,971) | 2,343 (1,955 to 2,727) | 8,884 (7,620 to 10,488) | 23,6 (19,9 to 27.8) | 236 (203 to 269) | 1,242 (1,045 to 1,438)        |                 |  |
|                              |                              | Kuwait   | Deaths | YLLs             | 1,673 (1,428 to 1,918) | 2,488 (2,079 to 2,927) | 1,185 (974 to 1,398) | 6,186 (5,236 to 6,971) | 2,343 (1,955 to 2,727) | 8,884 (7,620 to 10,488) | 23,6 (19,9 to 27.8) | 236 (203 to 269) | 1,242 (1,045 to 1,438)        |                 |  |
| North Africa and Middle East | North Africa and Middle East | Kuwait   | Deaths | YLLs             | 1,673 (1,428 to 1,918) | 2,488 (2,079 to 2,927) | 1,185 (974 to 1,398) | 6,186 (5,236 to 6,971) | 2,343 (1,955 to 2,727) | 8,884 (7,620 to 10,488) | 23,6 (19,9 to 27.8) | 236 (203 to 269) | 1,242 (1,045 to 1,438)        |                 |  |
|                              |                              | Kuwait   | Deaths | YLLs             | 1,673 (1,428 to 1,918) | 2,488 (2,079 to 2,927) | 1,185 (974 to 1,398) | 6,186 (5,236 to 6,971) | 2,343 (1,955 to 2,727) | 8,884 (7,620 to 10,488) | 23,6 (19,9 to 27.8) | 236 (203 to 269) | 1,242 (1,045 to 1,438)        |                 |  |
| North Africa and Middle East | North Africa and Middle East | Kuwait   | Deaths | YLLs             | 1,673 (1,428 to 1,918) | 2,488 (2,079 to 2,927) | 1,185 (974 to 1,398) | 6,186 (5,236 to 6,971) | 2,343 (1,955 to 2,727) | 8,884 (7,620 to 10,488) | 23,6 (19,9 to 27.8) | 236 (203 to 269) | 1,242 (1                      |                 |  |



## Chronic obstructive pulmonary disease

[illegible]



































































































## Chronic respiratory diseases





























## Chronic respiratory diseases

[illegible]















## Chronic respiratory diseases

[illegible]











## Chronic respiratory diseases

<









## Chronic respiratory diseases

| GDP | Year | Region | Location | Risk factor | Measure | Age | Birth | 1990 | Male | Birth | 1990 | Female | Birth | 1990 | Male | Birth | 1990 | Female | Birth | 1990 | Male | Birth | 1990 | Female | Birth | 1990 | Male | Birth | 1990 | Female | Birth | 1990 | Male | Birth | 1990 | Female | Birth | 1990 | Male | Birth | 1990 | Female | Birth | 1990 | Male | Birth | 1990 | Female | Birth | 1990 | Male | Birth | 1990 | Female | Birth | 1990 | Male | Birth | 1990 | Female | Birth | 1990 | Male | Birth | 1990 | Female | Birth | 1990 | Male | Birth | 1990 | Female | Birth | 1990 | Male | Birth | 1990 | Female | Birth | 1990 | Male | Birth | 1990 | Female | Birth | 1990 | Male | Birth | 1990 | Female | Birth | 1990 | Male | Birth | 1990 | Female | Birth | 1990 | Male | Birth | 1990 | Female | Birth | 1990 | Male | Birth | 1990 | Female | Birth | 1990 | Male | Birth | 1990 | Female | Birth | 1990 | Male | Birth | 1990 | Female | Birth | 1990 | Male | Birth | 1990 | Female | Birth | 1990 | Male | Birth | 1990 | Female | Birth | 1990 | Male | Birth | 1990 | Female | Birth | 1990 | Male | Birth | 1990 | Female | Birth | 1990 | Male | Birth | 1990 | Female | Birth | 1990 | Male | Birth | 1990 | Female | Birth | 1990 | Male | Birth | 1990 | Female | Birth | 1990 | Male | Birth | 1990 | Female | Birth | 1990 | Male | Birth | 1990 | Female | Birth | 1990 | Male | Birth | 1990 | Female | Birth | 1990 | Male | Birth | 1990 | Female | Birth | 1990 | Male | Birth | 1990 | Female | Birth | 1990 | Male | Birth | 1990 | Female | Birth | 1990 | Male | Birth | 1990 | Female | Birth | 1990 | Male | Birth | 1990 | Female | Birth | 1990 | Male | Birth | 1990 | Female | Birth | 1990 | Male | Birth | 1990 | Female | Birth | 1990 | Male | Birth | 1990 | Female | Birth | 1990 | Male | Birth | 1990 | Female | Birth | 1990 | Male | Birth |
|-----|------|--------|----------|-------------|---------|-----|-------|------|------|-------|------|--------|-------|------|------|-------|------|--------|-------|------|------|-------|------|--------|-------|------|------|-------|------|--------|-------|------|------|-------|------|--------|-------|------|------|-------|------|--------|-------|------|------|-------|------|--------|-------|------|------|-------|------|--------|-------|------|------|-------|------|--------|-------|------|------|-------|------|--------|-------|------|------|-------|------|--------|-------|------|------|-------|------|--------|-------|------|------|-------|------|--------|-------|------|------|-------|------|--------|-------|------|------|-------|------|--------|-------|------|------|-------|------|--------|-------|------|------|-------|------|--------|-------|------|------|-------|------|--------|-------|------|------|-------|------|--------|-------|------|------|-------|------|--------|-------|------|------|-------|------|--------|-------|------|------|-------|------|--------|-------|------|------|-------|------|--------|-------|------|------|-------|------|--------|-------|------|------|-------|------|--------|-------|------|------|-------|------|--------|-------|------|------|-------|------|--------|-------|------|------|-------|------|--------|-------|------|------|-------|------|--------|-------|------|------|-------|------|--------|-------|------|------|-------|------|--------|-------|------|------|-------|------|--------|-------|------|------|-------|------|--------|-------|------|------|-------|------|--------|-------|------|------|-------|------|--------|-------|------|------|-------|------|--------|-------|------|------|-------|------|--------|-------|------|------|-------|------|--------|-------|------|------|-------|
|-----|------|--------|----------|-------------|---------|-----|-------|------|------|-------|------|--------|-------|------|------|-------|------|--------|-------|------|------|-------|------|--------|-------|------|------|-------|------|--------|-------|------|------|-------|------|--------|-------|------|------|-------|------|--------|-------|------|------|-------|------|--------|-------|------|------|-------|------|--------|-------|------|------|-------|------|--------|-------|------|------|-------|------|--------|-------|------|------|-------|------|--------|-------|------|------|-------|------|--------|-------|------|------|-------|------|--------|-------|------|------|-------|------|--------|-------|------|------|-------|------|--------|-------|------|------|-------|------|--------|-------|------|------|-------|------|--------|-------|------|------|-------|------|--------|-------|------|------|-------|------|--------|-------|------|------|-------|------|--------|-------|------|------|-------|------|--------|-------|------|------|-------|------|--------|-------|------|------|-------|------|--------|-------|------|------|-------|------|--------|-------|------|------|-------|------|--------|-------|------|------|-------|------|--------|-------|------|------|-------|------|--------|-------|------|------|-------|------|--------|-------|------|------|-------|------|--------|-------|------|------|-------|------|--------|-------|------|------|-------|------|--------|-------|------|------|-------|------|--------|-------|------|------|-------|------|--------|-------|------|------|-------|------|--------|-------|------|------|-------|------|--------|-------|------|------|-------|------|--------|-------|------|------|-------|------|--------|-------|------|------|-------|------|--------|-------|------|------|-------|























Chronic respiratory diseases

| 7000 user region |  |  | 21 000 region |  |  | Location |  | Risk factor |  | Measure | Age | Both |  | 1990   |  | 2019 |  | Percent change (1990 to 2019) |  | Percent change (1990 to 2019) |  |
|------------------|--|--|---------------|--|--|----------|--|-------------|--|---------|-----|------|--|--------|--|------|--|-------------------------------|--|-------------------------------|--|
|                  |  |  |               |  |  |          |  |             |  |         |     |      |  | Female |  | Male |  |                               |  |                               |  |
|                  |  |  |               |  |  |          |  |             |  |         |     |      |  |        |  |      |  |                               |  |                               |  |
|                  |  |  |               |  |  |          |  |             |  |         |     |      |  |        |  |      |  |                               |  |                               |  |
|                  |  |  |               |  |  |          |  |             |  |         |     |      |  |        |  |      |  |                               |  |                               |  |
|                  |  |  |               |  |  |          |  |             |  |         |     |      |  |        |  |      |  |                               |  |                               |  |
|                  |  |  |               |  |  |          |  |             |  |         |     |      |  |        |  |      |  |                               |  |                               |  |
|                  |  |  |               |  |  |          |  |             |  |         |     |      |  |        |  |      |  |                               |  |                               |  |
|                  |  |  |               |  |  |          |  |             |  |         |     |      |  |        |  |      |  |                               |  |                               |  |
|                  |  |  |               |  |  |          |  |             |  |         |     |      |  |        |  |      |  |                               |  |                               |  |
|                  |  |  |               |  |  |          |  |             |  |         |     |      |  |        |  |      |  |                               |  |                               |  |
|                  |  |  |               |  |  |          |  |             |  |         |     |      |  |        |  |      |  |                               |  |                               |  |
|                  |  |  |               |  |  |          |  |             |  |         |     |      |  |        |  |      |  |                               |  |                               |  |
|                  |  |  |               |  |  |          |  |             |  |         |     |      |  |        |  |      |  |                               |  |                               |  |
|                  |  |  |               |  |  |          |  |             |  |         |     |      |  |        |  |      |  |                               |  |                               |  |
|                  |  |  |               |  |  |          |  |             |  |         |     |      |  |        |  |      |  |                               |  |                               |  |
|                  |  |  |               |  |  |          |  |             |  |         |     |      |  |        |  |      |  |                               |  |                               |  |
|                  |  |  |               |  |  |          |  |             |  |         |     |      |  |        |  |      |  |                               |  |                               |  |
|                  |  |  |               |  |  |          |  |             |  |         |     |      |  |        |  |      |  |                               |  |                               |  |
|                  |  |  |               |  |  |          |  |             |  |         |     |      |  |        |  |      |  |                               |  |                               |  |
|                  |  |  |               |  |  |          |  |             |  |         |     |      |  |        |  |      |  |                               |  |                               |  |
|                  |  |  |               |  |  |          |  |             |  |         |     |      |  |        |  |      |  |                               |  |                               |  |
|                  |  |  |               |  |  |          |  |             |  |         |     |      |  |        |  |      |  |                               |  |                               |  |
|                  |  |  |               |  |  |          |  |             |  |         |     |      |  |        |  |      |  |                               |  |                               |  |
|                  |  |  |               |  |  |          |  |             |  |         |     |      |  |        |  |      |  |                               |  |                               |  |
|                  |  |  |               |  |  |          |  |             |  |         |     |      |  |        |  |      |  |                               |  |                               |  |
|                  |  |  |               |  |  |          |  |             |  |         |     |      |  |        |  |      |  |                               |  |                               |  |
|                  |  |  |               |  |  |          |  |             |  |         |     |      |  |        |  |      |  |                               |  |                               |  |
|                  |  |  |               |  |  |          |  |             |  |         |     |      |  |        |  |      |  |                               |  |                               |  |
|                  |  |  |               |  |  |          |  |             |  |         |     |      |  |        |  |      |  |                               |  |                               |  |
|                  |  |  |               |  |  |          |  |             |  |         |     |      |  |        |  |      |  |                               |  |                               |  |
|                  |  |  |               |  |  |          |  |             |  |         |     |      |  |        |  |      |  |                               |  |                               |  |
|                  |  |  |               |  |  |          |  |             |  |         |     |      |  |        |  |      |  |                               |  |                               |  |
|                  |  |  |               |  |  |          |  |             |  |         |     |      |  |        |  |      |  |                               |  |                               |  |
|                  |  |  |               |  |  |          |  |             |  |         |     |      |  |        |  |      |  |                               |  |                               |  |
|                  |  |  |               |  |  |          |  |             |  |         |     |      |  |        |  |      |  |                               |  |                               |  |
|                  |  |  |               |  |  |          |  |             |  |         |     |      |  |        |  |      |  |                               |  |                               |  |
|                  |  |  |               |  |  |          |  |             |  |         |     |      |  |        |  |      |  |                               |  |                               |  |
|                  |  |  |               |  |  |          |  |             |  |         |     |      |  |        |  |      |  |                               |  |                               |  |
|                  |  |  |               |  |  |          |  |             |  |         |     |      |  |        |  |      |  |                               |  |                               |  |
|                  |  |  |               |  |  |          |  |             |  |         |     |      |  |        |  |      |  |                               |  |                               |  |
|                  |  |  |               |  |  |          |  |             |  |         |     |      |  |        |  |      |  |                               |  |                               |  |
|                  |  |  |               |  |  |          |  |             |  |         |     |      |  |        |  |      |  |                               |  |                               |  |
|                  |  |  |               |  |  |          |  |             |  |         |     |      |  |        |  |      |  |                               |  |                               |  |
|                  |  |  |               |  |  |          |  |             |  |         |     |      |  |        |  |      |  |                               |  |                               |  |
|                  |  |  |               |  |  |          |  |             |  |         |     |      |  |        |  |      |  |                               |  |                               |  |
|                  |  |  |               |  |  |          |  |             |  |         |     |      |  |        |  |      |  |                               |  |                               |  |
|                  |  |  |               |  |  |          |  |             |  |         |     |      |  |        |  |      |  |                               |  |                               |  |
|                  |  |  |               |  |  |          |  |             |  |         |     |      |  |        |  |      |  |                               |  |                               |  |
|                  |  |  |               |  |  |          |  |             |  |         |     |      |  |        |  |      |  |                               |  |                               |  |
|                  |  |  |               |  |  |          |  |             |  |         |     |      |  |        |  |      |  |                               |  |                               |  |
|                  |  |  |               |  |  |          |  |             |  |         |     |      |  |        |  |      |  |                               |  |                               |  |
|                  |  |  |               |  |  |          |  |             |  |         |     |      |  |        |  |      |  |                               |  |                               |  |
|                  |  |  |               |  |  |          |  |             |  |         |     |      |  |        |  |      |  |                               |  |                               |  |
|                  |  |  |               |  |  |          |  |             |  |         |     |      |  |        |  |      |  |                               |  |                               |  |
|                  |  |  |               |  |  |          |  |             |  |         |     | </   |  |        |  |      |  |                               |  |                               |  |





## Chronic respiratory diseases

[illegible]

### Appendix 3: Authors' Contributions

#### Providing data or critical feedback on data sources

Amirali Aali, Deldar M Abdullah, Abu Yousuf Md Abdullah, Aidin Abedi, Hassan Abolhassani, Denberu E A Adane, Tigist D Adane, Mohammad Adnan, Qorinah E S Adnani, Sajjad Ahmad, Ali Ahmadi, Ali Ahmed, Ayman Ahmed, Tarik Ahmed Rashid, Hanadi Al Hamad, Fares Alahdab, Astawus Alemayehu, Sheikh M Alif, Syed M Aljunid, Sami Almustanyir, Khalid A Altirkawi, Nelson Alvis-Guzman, Jalal Arabloo, Judie Arulappan, Tahira Ashraf, Seyyed Shamsadin Athari, Sara Bagherieh, Ovidiu C Baltatu, Maciej Banach, Mainak Bardhan, Amadou Barrow, Nebiyu S Bayileyeegn, Ajay N Bhat, Souad Bouaoud, Dejana Braithwaite, Michael Brauer, Muhammad Hammad Butt, Luis A Cámara, Gashaw S Chanie, Vijay Kumar Chattu, Dinh-Toi Chu, Aaron J Cohen, Natália Cruz-Martins, Aso M Darwesh, Mostafa Dianatinasab, Paul N Doku, Abdel Douiri, Haneil L Dsouza, Ebrahim Eini, Michael Ekholuenetale, Temitope C Ekundayo, Adeniyi F Fagbamigbe, Ali Fatehizadeh, Irina Filip, Richard C Franklin, Peter A Gaal, Santosh Gaihre, Mansour Ghafourifard, Reza Ghanbari, Ahmad Ghashghaee, Mahaveer Golechha, Pouya Goleij, Habtamu A Guadie, Sapna Gupta, Mostafa Hadei, Rabih Halwani, Claudiu Herteliu, Nobuyuki Horita, Mehdi Hosseinzadeh, Salman Hussain, Segun E Ibitoye, Sufyan Ibrahim, Nahlah Elkudssiah Ismail, Linda Merin J, Mihajlo Jakovljevic, Tahereh Javaheri, Sathish Kumar Jayapal, Shubha Jayaram, Tamas Joo, Jacek J Jozwiak, Billingsley Kaambwa, Zubair Kabir, Laleh R Kalankesh, Himal Kandel, Bekalu G Kassa, Himanshu Khajuria, Imteyaz A Khan, Moien AB Khan, Yusra H Khan, Haneen Khreis, Adnan Kisa, Sezer Kisa, Luke D Knibbs, Kewal Krishan, Om P Kurmi, Judit Lám, Savita Lasrado, Sang-woong Lee, Yo Han Lee, Samson M Legesse, Gang Liu, Wei Liu, László Lorenzovici, Narayan B Mahotra, Tauqeer Hussain Mallhi, Borhan Mansouri, Entezar Mehrabi Nasab, Ritesh G Menezes, Dechasa Adare Mengistu, Mahboobeh Meshkat, Erkin M Mirrakhimov, Awoke Misganaw, Prasanna Mithra, Mokhtar Mohammadi, Shafiu Mohammed, Syam Mohan, Nagabhishek Moka, Sara Momtazmanesh, Lorenzo Monasta, Mohammad Ali Moni, Maryam Moradi, Ebrahim Mostafavi, Christine Mpundu-Kaambwa, Efrén Murillo-Zamora, Sreenivas Narasimha Swamy, Aparna I Narayana, Zuhair S Natto, Biswa P Nayak, Sandhya Neupane Kandel, Robina K Niazi, Chimezie I Nzoputam, Ogochukwu J Nzoputam, Bogdan Oancea, Osaretin C Okonji, Andrew T Olagunju, Sergej M Ostojic, Mahesh P A, Jagadish Rao Padubidri, Mohammad Taha Pahlevan Fallahy, Adrian Pana, Jay Patel, Uttam Paudel, Paolo Pedersini, Renato B Pereira, Maarten J Postma, Mohammad Rabiee, Amir Radfar, Sima Rafiei, Fakher Rahim, Amir Masoud Rahmani, Juwel Rana, Chythra R Rao, Sowmya J Rao, Salman Rawaf, Lal Rawal, Reza Rawassizadeh, Maryam Rezaei, Nima Rezaei, Mónica Rodrigues, Jefferson A B Rodriguez, Leonardo Roeber, David Rojas-Rueda, Aly M A

Saad, Siamak Sabour, Basema Saddik, Umar Saeed, Sahar Saeedi Moghaddam, Harihar Sahoo, Mirza R Sajid, Abdallah M Samy, Milena M Santric-Milicevic, Bruno P Sao Jose, Brijesh Sathian, Maheswar Satpathy, Ganesh Kumar Saya, Allen Seylani, Masood A Shaikh, Mohd Shanawaz, Mohammed Shannawaz, Rahim Ali Sheikhi, Parnian Shobeiri, Jasvinder A Singh, Valentin Y Skryabin, Anna A Skryabina, Ireneous N Soyiri, Ker-Kan Tan, Pugazhenthathangaraju, Amir Tiyyuri, Mai T N Tran, Irfan Ullah, Pascual R Valdez, Job F M van Boven, Tommi J Vasankari, Bay Vo, Ronny Westerman, Suowen Xu, Yazachew Yismaw, Dong Keon Yon, Naohiro Yonemoto, Chuanhua Yu, Ismaeel Yunusa, Zahra Zareshahrabadi, and Mikhail S Zastrozhin

### **Developing methods or computational machinery**

Abu Yousuf Md Abdullah, Qorinah E S Adnani, Sajjad Ahmad, Ali Ahmadi, Tarik Ahmed Rashid, Mehrdad Amir-Behghadami, Souad Bouaoud, Michael Brauer, Aso M Darwesh, Mostafa Dianatinasab, Adeniyi F Fagbamigbe, Ali Fatehizadeh, Mehdi Hosseinzadeh, Tahereh Javaheri, Rohollah Kalhor, Adnan Kisa, Sezer Kisa, Sang-woong Lee, Borhan Mansouri, Mahboobeh Meshkat, Mokhtar Mohammadi, Sara Momtazmanesh, Mohammad Rabiee, Amir Masoud Rahmani, Reza Rawassizadeh, Maryam Rezaei, Negar Rezaei, Jefferson A B Rodriguez, Umar Saeed, Sahar Saeedi Moghaddam, Abdallah M Samy, Maheswar Satpathy, Ganesh Kumar Saya, Parnian Shobeiri, Bay Vo, Ronny Westerman, and Dong Keon Yon

### **Providing critical feedback on methods or results**

Amirali Aali, Michael Abdelmasseh, Meriem Abdoun, Deldar M Abdulah, Abu Yousuf Md Abdullah, Aidin Abedi, Hassan Abolhassani, Zahra Abrehdari-Tafreshi, Basavaprabhu Achappa, Denberu E A Adane, Tigist D Adane, Isaac Y Addo, Mohammad Adnan, Qorinah E S Adnani, Sajjad Ahmad, Ali Ahmadi, Keivan Ahmadi, Ali Ahmed, Ayman Ahmed, Tarik Ahmed Rashid, Hanadi Al Hamad, Fares Alahdab, Astawus Alemayehu, Sheikh M Alif, Syed M Aljunid, Sami Almustanyir, Khalid A Altirkawi, Nelson Alvis-Guzman, Javad Aminian Dehkordi, Mehrdad Amir-Behghadami, Robert Ancuceanu, Catalina Liliana Andrei, Tudorel Andrei, Jalal Arabloo, Judie Arulappan, Tahira Ashraf, Seyyed Shamsadin Athari, Engi F Attia, Sina Azadnajafabad, Abraham S Babu, Sara Bagherieh, Ovidiu C Baltatu, Maciej Banach, Mainak Bardhan, Amadou Barrow, Saurav Basu, Nebiyu S Bayileyeegn, Nikha Bhardwaj, Pankaj Bhardwaj, Ajay N Bhat, Kritika Bhattacharyya, Souad Bouaoud, Dejana Braithwaite, Muhammad Hammad Butt, Zahid A Butt, Gashaw S Chanie, Periklis Charalampous, Vijay Kumar Chattu, Odgerel Chimed-Ochir, Dinh-Toi Chu, Aaron J Cohen, Natália Cruz-Martins, Omid Dadras, Aso M Darwesh, Saswati Das, Sisay Abebe Debela, Laura Delgado-Ortiz, Mostafa

Dianatinasab, Nancy Diao, Daniel Diaz, Lankamo E Digesa, Gebisa Dirirsa, Paul N Doku, Deepa Dongarwar, Abdel Douiri, Haneil L Dsouza, Ebrahim Eini, Michael Ekholuenetale, Temitope C Ekundayo, Ahmed E M Elagali, Muhammed Elhadi, Daniel B Enyew, Rychindorj Erkhembayar, Farshid Etaee, Adeniyi F Fagbamigbe, Andre Faro, Farshad Farzadfar, Ali Fatehizadeh, Ginenus Fekadu, Irina Filip, Florian Fischer, Masoud Foroutan, Richard C Franklin, Peter A Gaal, Santosh Gaihre, Abduzhappar Gaipov, Urge Gerema, Motuma E Getachew, Tamiru Getachew, Mansour Ghafourifard, Seyyed-Hadi Ghamari, Reza Ghanbari, Ahmad Ghashghaee, Ali Gholami, Mahaveer Golechha, Davide Golinelli, Habtamu A Guadie, Bhawna Gupta, Sapna Gupta, Vivek K Gupta, Mostafa Hadei, Rabih Halwani, Asif Hanif, Arief Hargono, Mehdi Harorani, Risky K Hartono, Hamidreza Hasani, Abdiwahab Hashi, Mohammad Heidari, Claudiu Herteliu, Ramesh Holla, Nobuyuki Horita, Mohammad Hoseini, Mehdi Hosseinzadeh, Salman Hussain, Bing-Fang Hwang, Segun E Ibitoye, Sufyan Ibrahim, Olayinka S Ilesanmi, Irena M Ilic, Milena D Ilic, Mustapha Immurana, Nahlah Elkudssiah Ismail, Linda Merin J, Mihajlo Jakovljevic, Elham Jamshidi, Manthan D Janodia, Tahereh Javaheri, Sathish Kumar Jayapal, Shubha Jayaram, Ravi P Jha, Olatunji Johnson, Tamas Joo, Nitin Joseph, Jacek J Jozwiak, Vaishali K, Billingsley Kaambwa, Zubair Kabir, Rohollah Kalhor, Himal Kandel, Shama D Karanth, Ibraheem M Karaye, Bekalu G Kassa, Gizat M Kassie, Leila Keikavoosi-Arani, Mohammad Keykhaei, Himanshu Khajuria, Imteyaz A Khan, Moien AB Khan, Yusra H Khan, Haneen Khreis, Min Seo Kim, Adnan Kisa, Sezer Kisa, Pavel Kolkhir, Somayeh Komaki, Farzad Kompani, Hamid Reza Koohestani, Ali Koolivand, Oleksii Korzh, Ai Koyanagi, Kewal Krishan, Naveen Kumar, Nithin Kumar, Om P Kurmi, Ambily Kuttikkattu, Carlo La Vecchia, Judit Lám, Qing Lan, Bagher Larijani, Savita Lasrado, Kamaluddin Latief, Paolo Lauriola, Sang-woong Lee, Yo Han Lee, Samson M Legesse, Jacopo Lenzi, Ming-Chieh Li, Ro-Ting Lin, Gang Liu, Wei Liu, Chun-Han Lo, László Lorenzovici, Yifei Lu, Soundarya Mahalingam, Elham Mahmoudi, Elaheh Malakan Rad, Mohammad-Reza Malekpour, Ahmad A Malik, Tauqeer Hussain Mallhi, Deborah C Malta, Borhan Mansouri, Elezebeth Mathews, Sazan Q Maulud, Enkeleint A Mechili, Entezar Mehrabi Nasab, Ritesh G Menezes, Dechasa Adare Mengistu, Alexios-Fotios A Mentis, Mahboobeh Meshkat, Tomislav Mestrovic, Erkin M Mirrakhimov, Awoke Misganaw, Prasanna Mithra, Javad Moghadas, Mokhtar Mohammadi, Marita Mohammadshahi, Shafiu Mohammed, Syam Mohan, Nagabhishek Moka, Sara Momtazmanesh, Mohammad Ali Moni, Fateme Montazeri, Maryam Moradi, Ebrahim Mostafavi, Christine Mpundu-Kaambwa, Efrén Murillo-Zamora, Mohsen Naghavi, Tapas S Nair, Vinay Nangia, Sreenivas Narasimha Swamy, Aparna I Narayana, Zuhair S Natto, Biswa P Nayak, Wogene W Negash, Evangelia Nena, Sandhya Neupane Kandel, Robina K Niazi, Ali Nowroozi, Chimezie I Nzoputam, Ogochukwu J Nzoputam, Bogdan Oancea, Rahman Md Obaidur, Hassan Okati-Aliabad, Akinkunmi P Okekunle, Osaretin C Okonji, Andrew T Olagunju, Ahmed Omar Bali, Sergej M Ostojic, Mahesh P A, Jagadish Rao Padubidri, Mohammad Taha

Pahlevan Fallahy, Tamás Palicz, Adrian Pana, Eun-Kee Park, Jay Patel, Rajan Paudel, Uttam Paudel, Paolo Pedersini, Marcos Pereira, Renato B Pereira, Ionela-Roxana Petcu, Majid Pirestani, Maarten J Postma, Akila Prashant, Mohammad Rabiee, Amir Radfar, Fakher Rahim, Mosiur Rahman, Muhammad Aziz Rahman, Amir Masoud Rahmani, Shayan Rahmani, Vahid Rahmanian, Prashant Rajput, Juwel Rana, Chythra R Rao, Sowmya J Rao, Sina Rashedi, Mohammad-Mahdi Rashidi, Zubair Ahmed Ratan, David L Rawaf, Salman Rawaf, Lal Rawal, Reza Rawassizadeh, Mohammad Sadegh Razeghinia, Elrashdy M M Redwan, Maryam Rezaei, Nazila Rezaei, Negar Rezaei, Nima Rezaei, Mohsen Rezaeian, Mónica Rodrigues, Leonardo Roever, Kristina E Rudd, Aly M A Saad, Siamak Sabour, Basema Saddik, Erfan Sadeghi, Umar Saeed, Sahar Saeedi Moghaddam, Maryam Sahebazzamani, Harihar Sahoo, Mirza R Sajid, Sateesh Sakhamuri, Sana Salehi, Abdallah M Samy, Milena M Santric-Milicevic, Bruno P Sao Jose, Brijesh Sathian, Maheswar Satpathy, Ganesh Kumar Saya, Subramanian Senthilkumaran, Saeed Shahabi, Masood A Shaikh, Mohd Shanawaz, Mohammed Shannawaz, Shashank Shekhar, Parnian Shobeiri, Migbar M Sibhat, Jasvinder A Singh, Paramdeep Singh, Valentin Y Skryabin, Anna A Skryabina, Suhang Song, Ireneous N Soyiri, Leo Stockfelt, Jing Sun, Ken Takahashi, Iman M Talaat, Ker-Kan Tan, Birhan T Taye, Pugazhenthana Thangaraju, Rekha Thapar, Friedrich Thienemann, Amir Tiyyuri, Mai T N Tran, Jaya P Tripathy, Lorainne Tudor Car, Irfan Ullah, Sana Ullah, Pascual R Valdez, Rohollah Valizadeh, Job F M van Boven, Siavash Vaziri, Francesco S Violante, Bay Vo, Ning Wang, Melissa Y Wei, Ronny Westerman, Nuwan D Wickramasinghe, Suowen Xu, Xiaoyue Xu, Lalit Yadav, Yazachew Yismaw, Dong Keon Yon, Naohiro Yonemoto, Yong Yu, Ismaeel Yunusa, Mazyar Zahir, Moein Zangiabadian, Armin Zarrintan, Mikhail S Zastrozhin, Zelalem B Zegeye, and Yunquan Zhang

### **Drafting the work or revising is critically for important intellectual content**

Amirali Aali, Mohsen Abbasi-Kangevari, Zeinab Abbasi-Kangevari, Michael Abdelmasseh, Aidin Abedi, Hassan Abolhassani, Denberu E A Adane, Isaac Y Addo, Qorinah E S Adnani, Ali Ahmadi, Ayman Ahmed, Fares Alahdab, Sami Almustanyir, Nelson Alvis-Guzman, Mehrdad Amir-Behghadami, Robert Ancuceanu, Catalina Liliana Andrei, Tudorel Andrei, Anayochukwu E Anyasodor, Jalal Arabloo, Judie Arulappan, Engi F Attia, Meshesha T Ayele, Sina Azadnajafabad, Abraham S Babu, Sara Bagherieh, Ovidiu C Baltatu, Maciej Banach, Mainak Bardhan, Francesco Barone-Adesi, Amadou Barrow, Saurav Basu, Isabela M Bensenor, Ajay N Bhat, Kritika Bhattacharyya, Souad Bouaoud, Dejana Braithwaite, Muhammad Hammad Butt, Daniela Calina, Vijay Kumar Chattu, Dinh-Toi Chu, Aaron J Cohen, Natália Cruz-Martins, Saswati Das, Diriba Dereje, Mostafa Dianatinasab, Nancy Diao, Daniel Diaz, Gebisa Dirirsa, Paul N Doku, Deepa Dongarwar, Abdel Douiri, Haneil L Dsouza, Ebrahim Eini, Ahmed E M Elagali, Muhammed Elhadi, Rychindorj Erkhembayar,

Farshid Etaee, Adeniyi F Fagbamigbe, Andre Faro, Farshad Farzadfar, Ali Fatehizadeh, Irina Filip, Florian Fischer, Masoud Foroutan, Peter A Gaal, Santosh Gaihre, Abduzhappar Gaipov, Mesfin Gebrehiwot, Motuma E Getachew, Mansour Ghafourifard, Seyyed-Hadi Ghamari, Reza Ghanbari, Ali Gholami, Artyom U Gil, Davide Golinelli, Habtamu A Guadie, Bhawna Gupta, Sapna Gupta, Veer Bala Gupta, Vivek K Gupta, Mostafa Hadei, Rabih Halwani, Abdiwahab Hashi, Mohammad Heidari, Merel E Hellemons, Claudiu Herteliu, Ramesh Holla, Nobuyuki Horita, Junjie Huang, Salman Hussain, Ivo Iavicoli, Segun E Ibitoye, Olayinka S Ilesanmi, Irena M Ilic, Milena D Ilic, Mustapha Immurana, Nahlah Elkudssiah Ismail, Linda Merin J, Mihajlo Jakovljevic, Sathish Kumar Jayapal, Shubha Jayaram, Ravi P Jha, Tamas Joo, Nitin Joseph, Jacek J Jozwiak, Laleh R Kalankesh, Rohollah Kalhor, Himal Kandel, Shama D Karanth, Bekalu G Kassa, Himanshu Khajuria, Moien AB Khan, Yusra H Khan, Haneen Khreis, Adnan Kisa, Sezer Kisa, Luke D Knibbs, Pavel Kolkhir, Farzad Kompani, Oleksii Korzh, Ai Koyanagi, Kewal Krishan, Naveen Kumar, Om P Kurmi, Carlo La Vecchia, Judit Lám, Bagher Larijani, Savita Lasrado, Kamaluddin Latief, Samson M Legesse, Jacopo Lenzi, Wei Liu, Chun-Han Lo, Soundarya Mahalingam, Elham Mahmoudi, Elaheh Malakan Rad, Mohammad-Reza Malekpour, Ahmad A Malik, Tauqeer Hussain Mallhi, Deborah C Malta, Borhan Mansouri, Elezebeth Mathews, Sazan Q Maulud, Ritesh G Menezes, Dechasa Adare Mengistu, Alexios-Fotios A Mentis, Mahboobeh Meshkat, Tomislav Mestrovic, Ana C Micheletti Gomide Nogueira de Sá, Awoke Misganaw, Marita Mohammadshahi, Shafiu Mohammed, Sara Momtazmanesh, Lorenzo Monasta, Mohammad Ali Moni, Md Moniruzzaman, Fateme Montazeri, Maryam Moradi, Ebrahim Mostafavi, Mohsen Naghavi, Sreenivas Narasimha Swamy, Aparna I Narayana, Zuhair S Natto, Biswa P Nayak, Wogene W Negash, Evangelia Nena, Sandhya Neupane Kandel, Robina K Niazi, Antonio T Nogueira de Sá, Ali Nowroozi, Chimezie I Nzoputam, Ogochukwu J Nzoputam, Bogdan Oancea, Oluwakemi O Odukoya, Akinkunmi P Okekunle, Osaretin C Okonji, Andrew T Olagunju, Ahmed Omar Bali, Sergej M Ostojic, Mahesh P A, Alicia Padron-Monedero, Jagadish Rao Padubidri, Mohammad Taha Pahlevan Fallahy, Tamás Palicz, Adrian Pana, Jay Patel, Uttam Paudel, Paolo Pedersini, Marcos Pereira, Renato B Pereira, Ionela-Roxana Petcu, Maarten J Postma, Akila Prashant, Mohammad Rabiee, Amir Radfar, Fakher Rahim, Mohammad Hifz Ur Rahman, Shayan Rahmani, Prashant Rajput, Chythra R Rao, Sowmya J Rao, Sina Rashedi, Zubair Ahmed Ratan, David L Rawaf, Salman Rawaf, Lal Rawal, Elrashdy M M Redwan, Maryam Rezaei, Nazila Rezaei, Negar Rezaei, Nima Rezaei, Mónica Rodrigues, Jefferson A B Rodriguez, Leonardo Roeber, David Rojas-Rueda, Kristina E Rudd, Aly M A Saad, Siamak Sabour, Basema Saddik, Masoumeh Sadeghi, Umar Saeed, Sahar Saeedi Moghaddam, Amirhossein Sahebkar, Mirza R Sajid, Sateesh Sakhamuri, Abdallah M Samy, Milena M Santric-Milicevic, Maheswar Satpathy, Ganesh Kumar Saya, Allen Seylani, Saeed Shahabi, Mohd Shanawaz, Mohammed Shannawaz, Shashank Shekhar, Parnian Shobeiri, Colin R Simpson, Jasvinder A Singh,

Paramdeep Singh, Surjit Singh, Valentin Y Skryabin, Anna A Skryabina, Mohammad Sadegh Soltani-Zangbar, Ireneous N Soyiri, Paschalis Steiropoulos, Leo Stockfelt, Iman M Talaat, Ker-Kan Tan, Nathan Y Tat, Vivian Y Tat, Pugazhenthath Thangaraju, Friedrich Thienemann, Mai T N Tran, Jaya P Tripathy, Lorainne Tudor Car, Biruk S Tusa, Irfan Ullah, Marco Vacante, Job F M van Boven, Tommi J Vasankari, Melissa Y Wei, Ronny Westerman, Nuwan D Wickramasinghe, Lalit Yadav, Dong Keon Yon, Naohiro Yonemoto, Mazyar Zahir, Armin Zarrintan, and Mikhail S Zastrozhin

### **Managing the estimation or publications process**

Ali Ahmadi, Ali Fatehizadeh, Simon I Hay, Borhan Mansouri, Sara Momtazmanesh, Mahesh P A, Mohammad Rabiee, Maryam Rezaei, Nazila Rezaei, Negar Rezaei, Jefferson A B Rodriguez, Aly M A Saad, Sahar Saeedi Moghaddam, Abdallah M Samy, Pugazhenthath Thangaraju, Dong Keon Yon, and Mikhail S Zastrozhin
